# Supplementary material
Source: PubMed Central journal article supplement (PMC5896313)

## **Supporting Information**

Spin-Center Shift-Enabled Direct Enantioselective  $\alpha$ -Benzylation of  
Aldehydes with Alcohols

**Eric D. Nacsa and David W. C. MacMillan\***

*Corresponding Author: [dmacmill@princeton.edu](mailto:dmacmill@princeton.edu)*

*Merck Center for Catalysis at Princeton University, Princeton, New Jersey 08544*

## TABLE OF CONTENTS

|                                                                                                     |            |
|-----------------------------------------------------------------------------------------------------|------------|
| <b>I. General Information</b> .....                                                                 | <b>3</b>   |
| <b>II. Apparatus for Controlled Cooling Under Blue LED Irradiation</b> .....                        | <b>4</b>   |
| <b>III. Optimization Studies (Table 1)</b> .....                                                    | <b>6</b>   |
| <b>IV. General Procedures</b> .....                                                                 | <b>14</b>  |
| <b>V. Data for Enantioenriched <math>\alpha</math>-Alkylated Aldehydes (Tables 2 &amp; 3)</b> ..... | <b>16</b>  |
| <b>VI. Enantioselective Synthesis of PK-14067 (44) (Figure 2)</b> .....                             | <b>42</b>  |
| <b>VII. Synthesis of Aldehyde Substrates</b> .....                                                  | <b>46</b>  |
| <b>VIII. Synthesis of Benzylic Electrophile Substrates</b> .....                                    | <b>47</b>  |
| <b>IX. Synthesis of <math>\alpha</math>-Acetoxyacetophenone Electrophile Substrates</b> .....       | <b>69</b>  |
| <b>X. Synthesis of Catalysts</b> .....                                                              | <b>70</b>  |
| <b>XI. Photophysical Properties of Photocatalysts (Figure 3)</b> .....                              | <b>86</b>  |
| <b>XII. Electrochemical Properties of Photocatalysts (Figure 3)</b> .....                           | <b>95</b>  |
| <b>XIII. Comprehensive Summary of Photocatalyst Properties (Figure 3)</b> .....                     | <b>103</b> |
| <b>XIV. Electrochemical Properties of Substrates (Table 4)</b> .....                                | <b>105</b> |
| <b>XV. Electrochemical Properties of Catalytically-Generated Enamine (Scheme 2)</b> .....           | <b>110</b> |
| <b>XVI. Stern-Volmer Fluorescence Quenching Studies (Table 4)</b> .....                             | <b>114</b> |
| <b>XVII. Quantum Yield Determination (Figure 4)</b> .....                                           | <b>118</b> |
| <b>XVIII. Determination of Stereochemical Outcome</b> .....                                         | <b>123</b> |
| <b>XIX. Further Discussion of Table 4</b> .....                                                     | <b>125</b> |
| <b>XX. Effect of Alcohol Electrophile Aromatic Structure on Reactivity</b> .....                    | <b>128</b> |
| <b>XXI. Preliminary Kinetic Studies to Evaluate Organocatalytic Cycle</b> .....                     | <b>132</b> |
| <b>XXII. References</b> .....                                                                       | <b>140</b> |
| <b>XXIII. Chiral HPLC Chromatograms</b> .....                                                       | <b>144</b> |
| <b>XXIV. NMR Spectra</b> .....                                                                      | <b>199</b> |

## I. General Information

Commercial aldehydes and 2,6-lutidine were distilled at reduced pressure before use. Methanol, acetonitrile, dimethylformamide, 1,4-dioxane, 1,2-dimethoxyethane, CH<sub>2</sub>Cl<sub>2</sub>, tetrahydrofuran, ether, and dimethylsulfoxide were dried using a J. C. Meyer solvent purification system. All other commercial reagents and solvents were used as received. Organic solutions were concentrated under reduced pressure on a Büchi rotary evaporator. Chromatographic purification of products was accomplished by flash chromatography on Silicycle F60 silica gel. Thin-layer chromatography was performed on Analtech 250 micron silica gel F-254 plates and preparative thin-layer chromatography was performed on analogous 1000 micron silica gel plates. <sup>1</sup>H NMR spectra were recorded on a Bruker Ultrashield Plus Avance III 500 MHz spectrometer, and are internally referenced to residual protic solvent signals of CDCl<sub>3</sub> (7.26 ppm), DMSO-*d*<sub>6</sub> (2.50 ppm), or CD<sub>2</sub>Cl<sub>2</sub> (5.32 ppm). Data for <sup>1</sup>H NMR are reported as follows: chemical shift ( $\delta$  ppm), integration, multiplicity (s = singlet, d = doublet, t = triplet, q = quartet, m = multiplet, br = broad, app = apparent), and coupling constant (Hz). <sup>13</sup>C NMR spectra are internally referenced to CDCl<sub>3</sub> (77.16 ppm), DMSO-*d*<sub>6</sub> (39.52 ppm), or CD<sub>2</sub>Cl<sub>2</sub> (53.84 ppm). Data for <sup>13</sup>C NMR are reported in terms of chemical shift and, if coupled to fluorine, multiplicity and coupling constant (Hz). High-resolution mass spectra were obtained at the Princeton University Mass Spectrometry Facilities. IR spectra were recorded on a Perkin Elmer Paragon 1000 spectrometer and peaks are reported in terms of frequency of absorption (cm<sup>-1</sup>). HPLC was performed on an Agilent 1260 Infinity instrument using chiral columns as noted for each compound. Optical rotations were measured on a Jasco P-1010 polarimeter with  $[\alpha]_D$  values reported in degrees and concentration (c) in g/100 mL. UV-Vis spectra were recorded on an Agilent 8453 UV-Vis spectrometer. Fluorescence emission spectra were recorded on an Agilent Cary Eclipse fluorescence spectrometer. CV experiments were performed using a CH Instruments electrochemical analyzer.

## II. Apparatus for Controlled Cooling Under Blue LED Irradiation

A large crystallizing dish filled with isopropanol was placed on a stir plate. Four 34 W blue Kessil LED lamps were held next to the dish using a system of metal bars and clamps. 8 mL vials (up to two vials per LED lamp) were suspended at the edge of the dish and immersed in the isopropanol bath using copper wire. Both the isopropanol bath and the reaction vials were stirred using Teflon-coated stir bars at 200–300 rpm. Cooling was achieved by using the clamp system to hold the coils of a Neslab CC 100 Immersion Cooler in the isopropanol bath. To achieve temperatures of 0 °C, the system was cooled to  $\sim -10$  °C over  $\sim 1$  hour, the desired number of LED lamps were switched on, and the cooling system was iteratively adjusted so the bath temperature was held at  $(0 \pm 2)$  °C as judged by a thermometer positioned in the bath directly in front of a working LED lamp (the LED lamps produce a substantial amount of heat) before exposing the reactions to light. Although ice collects on the sides of the dish, the heat from the lamps tends to prevent ice or water from obstructing the incident light, ensuring reliable photon penetration into the reaction medium.

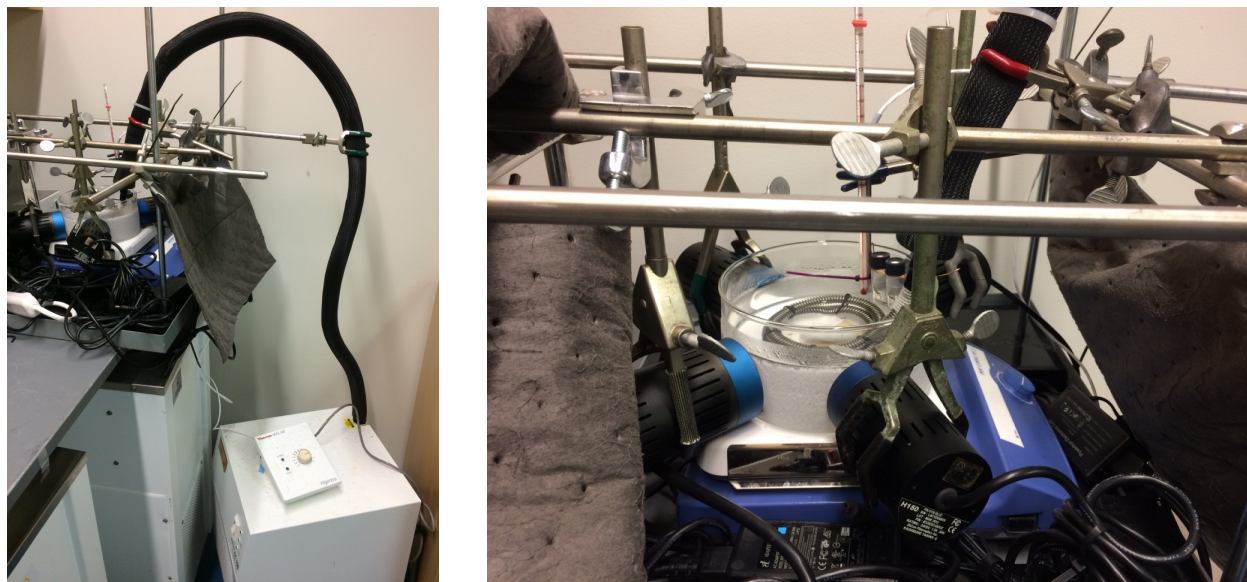

**Figure S1.** Photographs of the irradiation setup with controlled cooling.



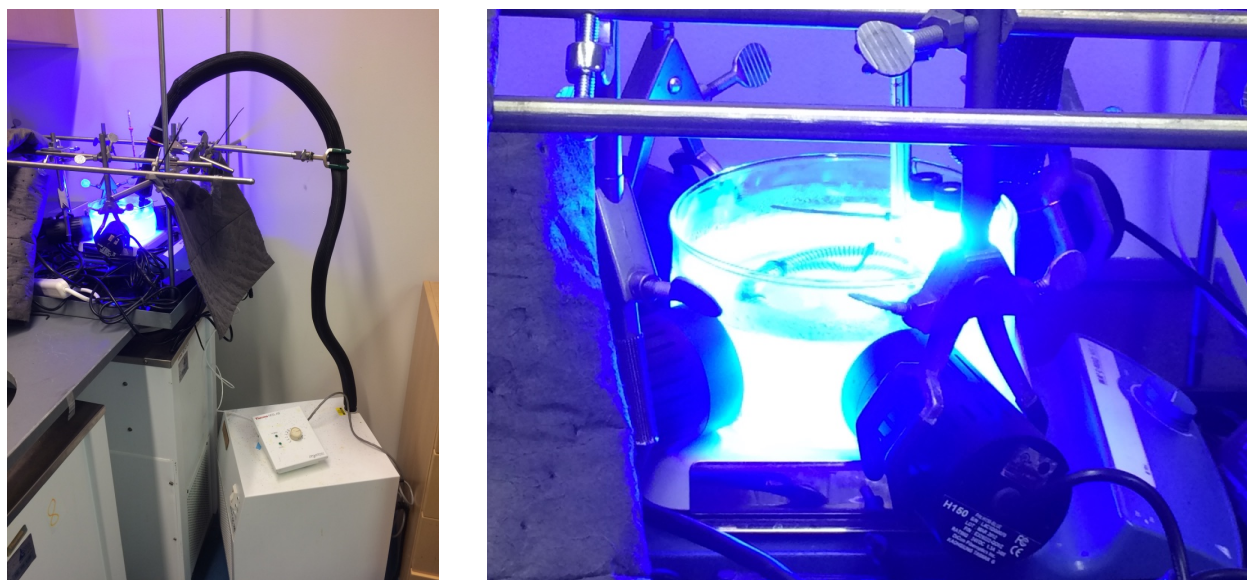

**Figure S2.** Photographs of the irradiation setup (lights switched on) with controlled cooling.

### III. Optimization Studies (Table 1)

A stock solution of 4-(hydroxymethyl)pyridine (**3**), photocatalyst, organocatalyst, and any other materials such as hydrocinnamaldehyde (**13**), 2,6-lutidine, water, and acids used in constant amounts throughout each experiment in the indicated solvent was prepared and transferred to 8 mL vials such that 0.1 mmol of 4-(hydroxymethyl)pyridine was added. Any materials used in varying quantities throughout an experiment were then added to each reaction vial. The solutions were sparged with nitrogen for 15 minutes while stirring at 150 rpm, and the vials were sealed with parafilm and stirred next to a 34 W blue LED lamp in an ice water bath or cooled by a fan. After the indicated time, an aliquot of the reaction ( $\sim 25 \mu\text{L}$ ) was dissolved in  $\sim 5:1$   $\text{CDCl}_3/\text{DMSO-}d_6$  (0.6 mL) in an NMR tube and the yield of the desired aldehyde, the 4-methylpyridine byproduct, and consumption of 4-(hydroxymethyl)pyridine was determined relative to an internal standard (typically the 2,6-lutidine present in the reaction, which is not consumed). The remaining mixture was diluted with saturated  $\text{NaHCO}_3$  (5 mL) and extracted with ether ( $3 \times 5$  mL). The combined organic extracts were dried over  $\text{Na}_2\text{SO}_4$  and concentrated. The crude material was dissolved in  $\text{CH}_2\text{Cl}_2$  (1 mL) and methanol (0.2 mL) and treated with sodium borohydride (39 mg, 1.0 mmol, 10 equiv). After 1 hour, the reaction was quenched with water (5 mL), the mixture was extracted with  $\text{CH}_2\text{Cl}_2$  ( $3 \times 5$  mL), and the combined organic extracts were dried over  $\text{Na}_2\text{SO}_4$  and concentrated. The residue was purified by chromatography on silica gel (0  $\rightarrow$  1% methanol/ $\text{CH}_2\text{Cl}_2$  + 0.5% triethylamine), and the enantiopurity of the alcohol was determined by chiral HPLC.

**Chiral HPLC:** AD-H column, 10% ethanol/hexanes, 1.0 mL/min.  $t_R = 15.0$  min (major (*R*)-enantiomer), 18.6 min (minor (*S*)-enantiomer).

**Table S1.** Initial discovery of enantioselective  $\alpha$ -alkylation of aldehydes with alcohols and its dependence of trifluoroacetic acid (TFA) and 2,6-lutidine stoichiometry.

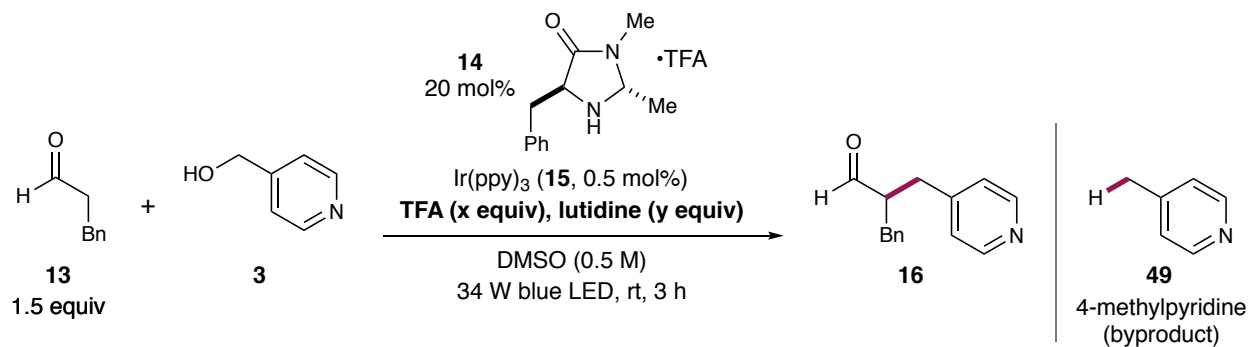

| equiv TFA | equiv lutidine | conversion (%) | 4-methylpyridine (%) | yield (%) | ee (%) |
|-----------|----------------|----------------|----------------------|-----------|--------|
| 0         | 0              | 42             | 0                    | 0         | nd     |
| 0.5       | 0              | 58             | 18                   | 24        | 66     |
| 1.0       | 0              | 77             | 25                   | 37        | 62     |
| 1.5       | 0              | 84             | 22                   | 44        | 60     |
| 2.0       | 0              | 92             | 21                   | 55        | 57     |
| 1.0       | 3.0            | 51             | 0                    | 0         | nd     |
| 0         | 2.0            | 39             | 0                    | 0         | nd     |

**Table S2.** Effect of water content on the enantioselective  $\alpha$ -alkylation of aldehydes with alcohols.

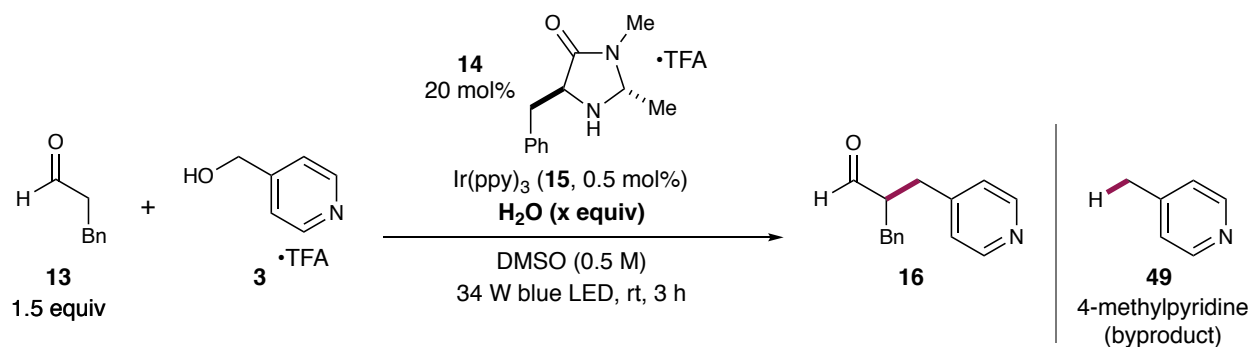

| equiv H <sub>2</sub> O | conversion (%) | 4-methylpyridine (%) | yield (%) | ee (%) |
|------------------------|----------------|----------------------|-----------|--------|
| 0                      | 60             | 22                   | 34        | 66     |
| 1                      | 60             | 23                   | 32        | 73     |
| 2                      | 59             | 21                   | 35        | 76     |
| 3                      | 61             | 23                   | 37        | 78     |
| 5                      | 65             | 26                   | 38        | 80     |
| 10                     | 71             | 23                   | 38        | 82     |
| 15                     | 75             | 23                   | 36        | 86     |
| 25                     | nd             | nd                   | 27        | 90     |
| 50                     | nd             | nd                   | 24        | 90     |
| 100                    | nd             | nd                   | 4         | nd     |

**Table S3.** Effect of acid additive on the enantioselective  $\alpha$ -alkylation of aldehydes with alcohols.

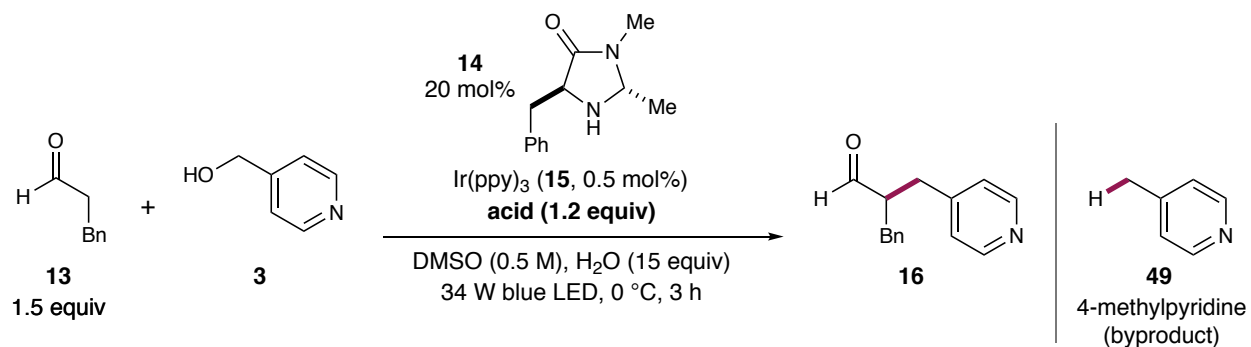

| acid                                | conversion (%) | 4-methylpyridine (%) | yield (%) | ee (%) |
|-------------------------------------|----------------|----------------------|-----------|--------|
| AcOH                                | 37             | 8                    | 13        | nd     |
| ClH <sub>2</sub> CCO <sub>2</sub> H | 72             | 18                   | 32        | 75     |
| Cl <sub>2</sub> HCCO <sub>2</sub> H | 70             | 10                   | 28        | 86     |
| TFA                                 | 71             | 8                    | 22        | 92     |
| HBr                                 | 81             | 6                    | 17        | 90     |
| HBF <sub>4</sub>                    | 82             | 6                    | 15        | 94     |
| TsOH                                | 79             | 11                   | 18        | 93     |
| HOTf                                | 84             | 6                    | 21        | 92     |
| <b>lutidine•HOTf*</b>               | 91             | 17                   | 47        | 88     |

\*Prepared by addition of trifluoromethanesulfonic acid (1 equiv) to a solution of 2,6-lutidine (1 equiv) in ether (1 M) at 0 °C. The precipitate was collected and recrystallized from 5:1 ether/acetone.

**Table S4.** Effect of HOTf and 2,6-lutidine stoichiometry on the enantioselective  $\alpha$ -alkylation of aldehydes with alcohols.

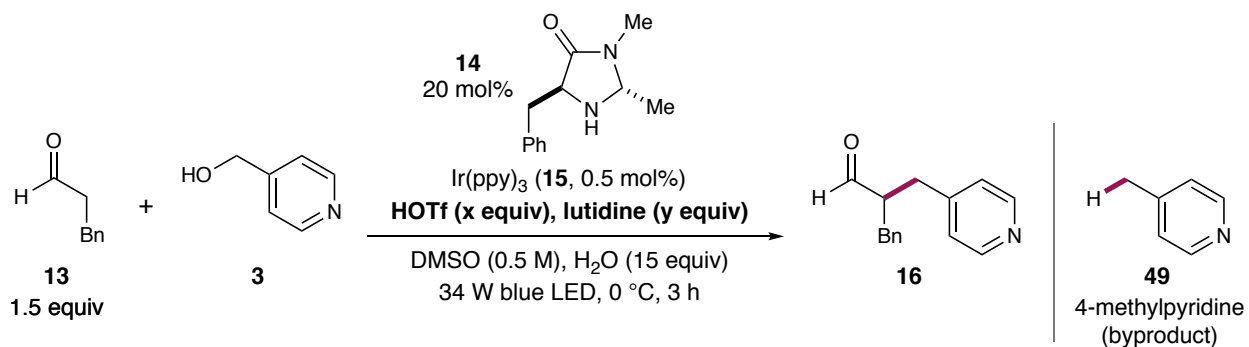

| equiv HOTf | equiv lutidine | conversion (%) | 4-methylpyridine (%) | yield (%) | ee (%) |
|------------|----------------|----------------|----------------------|-----------|--------|
| 0.25       | 0.25           | 86             | 23                   | 46        | 87     |
| 0.50       | 0.50           | 88             | 23                   | 50        | 88     |
| 1.00       | 1.00           | 88             | 18                   | 51        | 89     |
| 1.20       | 1.20           | nd             | 17                   | 47        | 88     |
| 1.50       | 1.50           | 87             | 15                   | 48        | 89     |
| 0.50       | 1.00           | 69             | 22                   | 40        | 89     |
| 1.00       | 0.50           | 91             | 17                   | 56        | 90     |
| 1.00       | 0.25           | 93             | 14                   | 65        | 90     |
| 1.00       | 0.00           | nd             | 4                    | 27        | 92     |

**Table S5.** Effect of acid additive on enantioselective  $\alpha$ -alkylation of aldehydes with alcohols with 2,6-lutidine present.

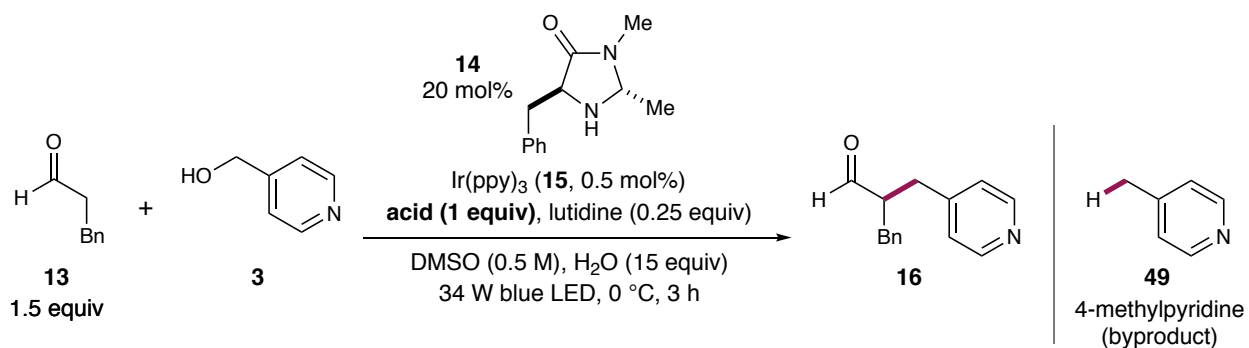

| acid              | conversion (%) | 4-methylpyridine (%) | yield (%) | ee (%) |
|-------------------|----------------|----------------------|-----------|--------|
| TFA               | 78             | 20                   | 48        | 88     |
| TsOH              | 87             | 13                   | 59        | 89     |
| HClO <sub>4</sub> | 84             | 15                   | 60        | 89     |
| HBF <sub>4</sub>  | 89             | 15                   | 61        | 90     |
| HOTf              | 93             | 14                   | 65        | 90     |
| HBr               | 91             | 14                   | 66        | 90     |

**Table S6.** Effect of concentration and water content on enantioselective  $\alpha$ -alkylation of aldehydes with alcohols.

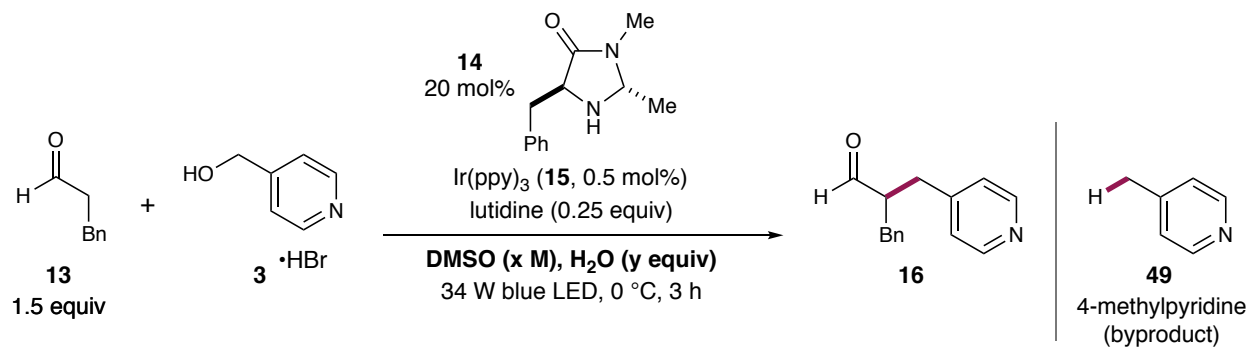

| concentration (M) | equiv. $\text{H}_2\text{O}$ | conversion (%) | 4-methylpyridine (%) | yield (%) | ee (%) |
|-------------------|-----------------------------|----------------|----------------------|-----------|--------|
| 0.05              | 15                          | 45             | 24                   | 11        | nd     |
| 0.10              | 15                          | 47             | 27                   | 14        | 93     |
| 0.25              | 15                          | 72             | 24                   | 39        | 90     |
| 0.50              | 15                          | 80             | 15                   | 51        | 87     |
| 0.25              | 30                          | 84             | 18                   | 48        | 90     |
| 0.25              | 50                          | 88             | 12                   | 53        | 89     |
| 0.25              | 75                          | 60             | 5                    | 41        | 88     |
| 0.25              | 100                         | 36             | 6                    | 24        | 88     |

**Table S7.** Effect of photocatalyst on enantioselective  $\alpha$ -alkylation of aldehydes with alcohols.

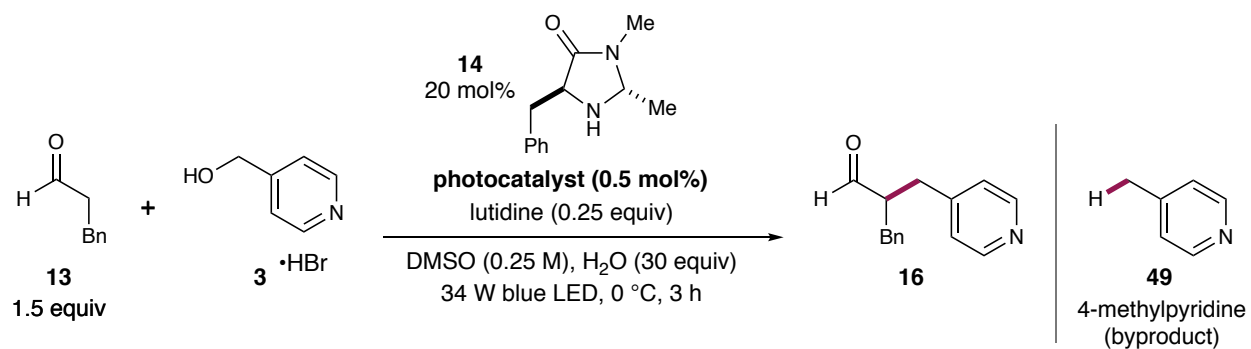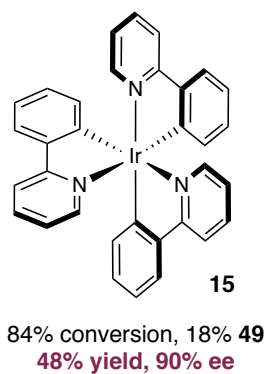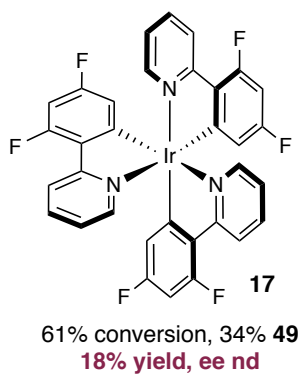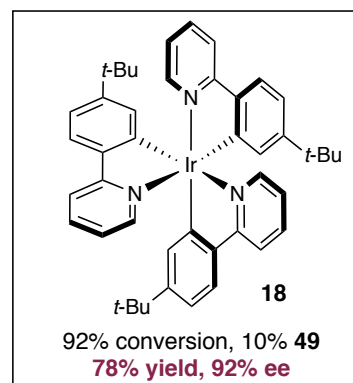



**Table S8.** Effect of solvent on enantioselective  $\alpha$ -alkylation of aldehydes with alcohols.

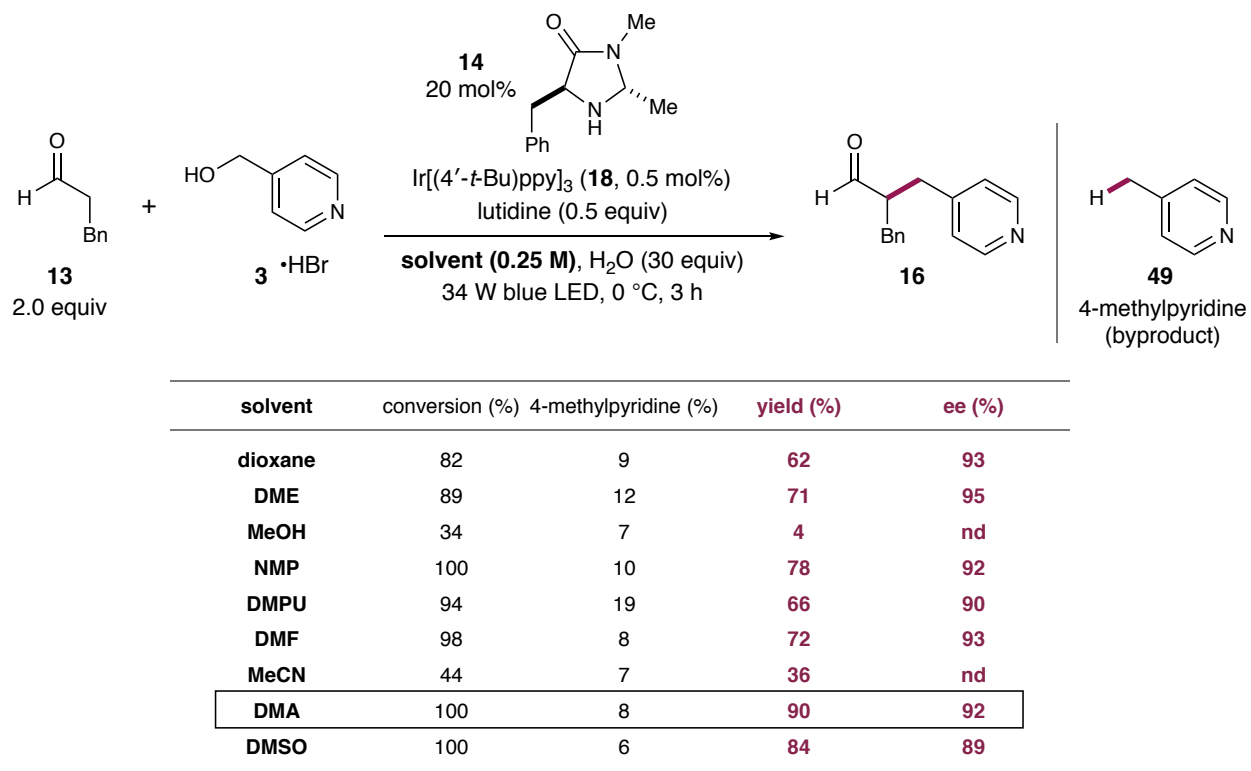

**Table S9.** Effect of organocatalyst on enantioselective  $\alpha$ -alkylation of aldehydes with alcohols.

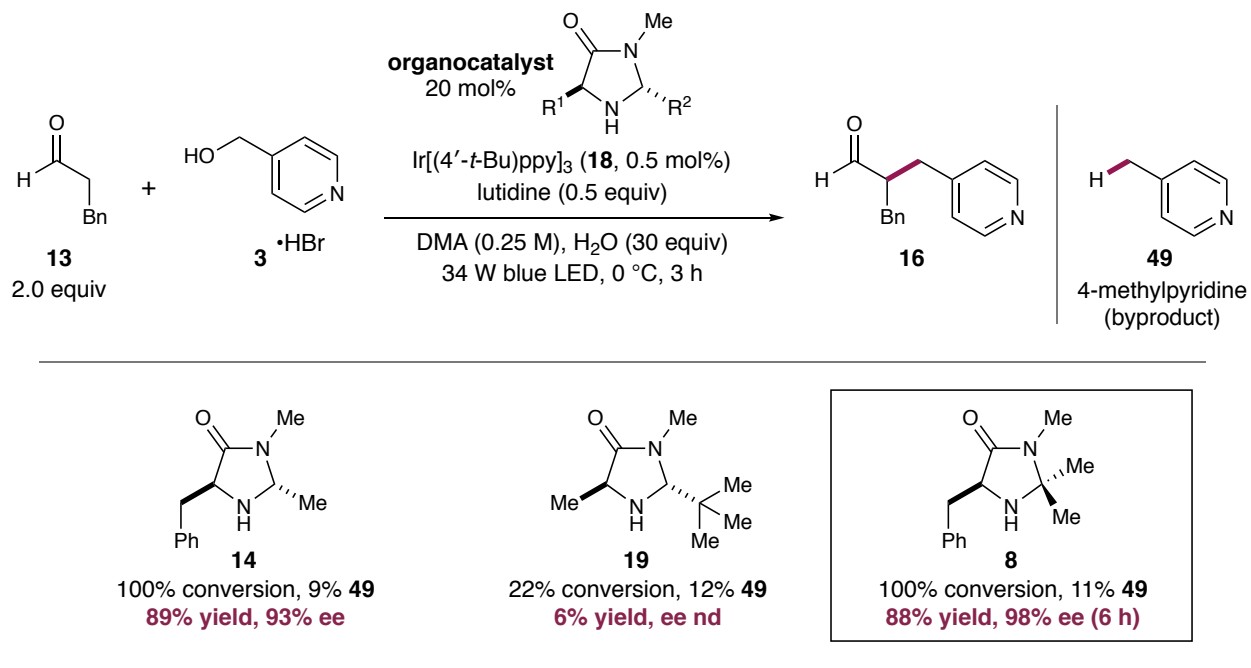

## IV. General Procedures

### General Procedure A. Enantioselective $\alpha$ -Benzylation of Aldehydes with 4-(Hydroxymethyl)-substituted Pyridines and Quinolines (Tables 2 & 4, Figure 3).

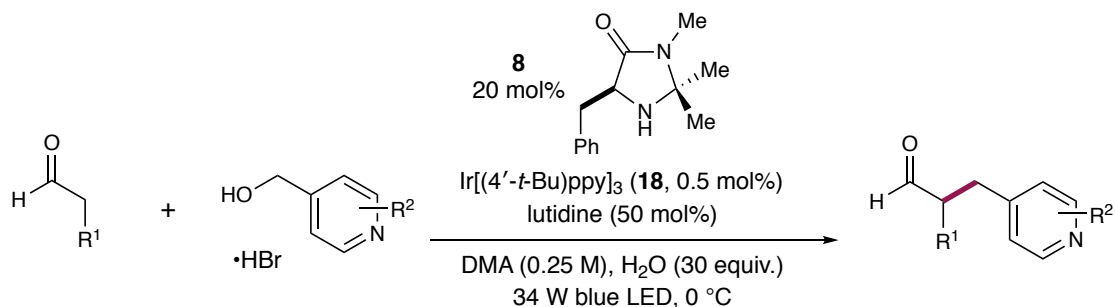

Photocatalyst **18** (2.1 mg, 2.6  $\mu$ mol, 0.5 mol%), organocatalyst **8** (22 mg, 0.10 mmol, 20 mol%), and starting alcohol (0.50 mmol, 1.0 equiv) were added to an 8 mL vial, followed by dimethylacetamide (2.0 mL), 2,6-lutidine (29  $\mu$ L, 0.25 mmol, 0.50 equiv), water (0.27 mL, 15 mmol, 30 equiv), and aldehyde (1.0 mmol, 2.0 equiv). The mixture was sparged with nitrogen for 15 minutes while stirring at 250 rpm, and the vial was sealed with parafilm and stirred in an isopropanol bath maintained at 0 °C with an immersion cooler next to a 34 W blue LED lamp. Once the alcohol was consumed, the mixture was diluted with saturated NaHCO<sub>3</sub> (10 mL) and extracted with ether (3  $\times$  10 mL). The combined organic extracts were dried over Na<sub>2</sub>SO<sub>4</sub> and concentrated. The residue was purified by flash chromatography on silica gel. The aldehyde product, itself, was characterized, except for optical rotation and chiral HPLC analysis, since these aldehydes are prone to racemization. Products which could not be isolated cleanly were characterized as the corresponding alcohols.

To assess the enantiopurity of the products, a duplicate experiment was performed, except the crude material was dissolved in CH<sub>2</sub>Cl<sub>2</sub> (5 mL) and methanol (1 mL) and treated with sodium borohydride (190 mg, 5.0 mmol, 10 equiv). After 1 hour, the reaction was quenched with water (10 mL), the mixture was extracted with CH<sub>2</sub>Cl<sub>2</sub> (3  $\times$  10 mL), and the combined organic extracts were dried over Na<sub>2</sub>SO<sub>4</sub> and concentrated. The residue was purified by flash chromatography on silica gel, and often purified further by preparative thin layer chromatography. The optical rotation

was measured and the enantiopurity was determined by chiral HPLC. Racemic alcohols to develop chiral HPLC assays were obtained by conducting the reaction with racemic organocatalyst.

Reactions in Table 4 were performed on 0.25 mmol scale and yields were determined by  $^1\text{H}$  NMR. The crude residue was then reduced with  $\text{NaBH}_4$  and assessed for product enantiopurity, as for optimization experiments. Reactions in Figure 3 were also performed on 0.25 mmol scale, employed racemic organocatalyst, and yields were determined by  $^1\text{H}$  NMR, as for optimization experiments.

### General Procedure B. Enantioselective $\alpha$ -Alkylation of Aldehydes with $\alpha$ -acetoxy-substituted Acetophenones (Table 3).

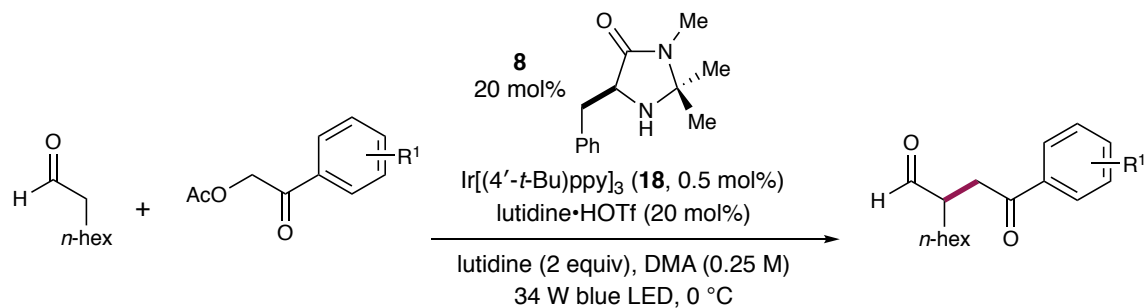

Photocatalyst **18** (2.1 mg, 2.6  $\mu\text{mol}$ , 0.5 mol%), organocatalyst **8** (22 mg, 0.10 mmol, 20 mol%), 2,6-lutidine•HOTf (26 mg, 0.10 mmol, 20 mol%) and starting acetate (0.50 mmol, 1.0 equiv) were added to an 8 mL vial, followed by dimethylacetamide (2.0 mL), 2,6-lutidine (117  $\mu\text{L}$ , 1.00 mmol, 2.00 equiv), and octanal (**45**) (156  $\mu\text{L}$ , 1.0 mmol, 2.0 equiv). The mixture was sparged with nitrogen for 15 minutes while stirring at 250 rpm, and the vial was sealed with parafilm and stirred in an isopropanol bath maintained at 0 °C with an immersion cooler next to a 34 W blue LED lamp. Once the acetate was consumed, the mixture was diluted with saturated  $\text{NaHCO}_3$  (10 mL) and extracted with ether ( $3 \times 10$  mL). The combined organic extracts were dried over  $\text{Na}_2\text{SO}_4$  and concentrated. The residue was purified by flash chromatography on silica gel. Racemic products to develop chiral HPLC assays were obtained by conducting the reaction with racemic organocatalyst.

## V. Data for Enantioenriched $\alpha$ -Alkylated Aldehydes (Tables 2 & 3)

### (*R*)-2-benzyl-3-(4-pyridinyl)propionaldehyde (16)

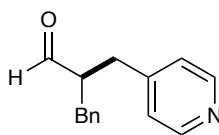

Prepared according to General Procedure A, irradiating for 5 hours. The aldehyde was purified by flash chromatography using an ethyl acetate/hexanes eluent (10  $\rightarrow$  25%) containing 1% triethylamine to afford a clear, colorless oil (95 mg, 84% yield). The corresponding alcohol was purified by flash chromatography using a methanol/CH<sub>2</sub>Cl<sub>2</sub> eluent (0  $\rightarrow$  1%) containing 0.5% triethylamine followed by preparative thin layer chromatography (50% ethyl acetate/hexanes + 1% triethylamine) to afford a pale yellow oil.

**<sup>1</sup>H NMR (500 MHz, CDCl<sub>3</sub>):**  $\delta$  9.71 (s, 1H), 8.47 (d,  $J$  = 5.3 Hz, 2H), 7.28 (app t, 2H), 7.22 (app t, 1H), 7.13 (d,  $J$  = 7.6 Hz, 2H), 7.04 (d,  $J$  = 5.2 Hz, 2H), 3.10 – 2.92 (m, 3H), 2.79 – 2.62 (m, 2H).

**<sup>13</sup>C NMR (126 MHz, CDCl<sub>3</sub>):**  $\delta$  202.8, 149.9, 148.0, 137.8, 129.0, 128.8, 126.8, 124.4, 53.9, 35.0, 33.7.

**IR (film):**  $\nu$  3065, 3028, 2925, 2845, 2726, 1722, 1601, 1558, 1497, 1454, 1416, 1394, 1221, 1070, 1030, 993, 916, 880, 835, 789, 749, 701 cm<sup>-1</sup>.

**HRMS (ESI-TOF):**  $m/z$  calculated for C<sub>15</sub>H<sub>16</sub>NO [M+H]<sup>+</sup> 226.1226, found 226.1227.

**Chiral HPLC (alcohol):** AD-H column, 10% ethanol/hexanes, 1.0 mL/min, 98% ee.  $t_R$  = 15.0 min (major (*R*)-enantiomer), 18.6 min (minor (*S*)-enantiomer).

**$[\alpha]_D^{20}$  (alcohol):** -3.0 (c = 1.0, CH<sub>2</sub>Cl<sub>2</sub>), -3.1 (c = 1.0, CHCl<sub>3</sub>), lit<sup>1</sup>  $[\alpha]_D^{23}$  -3.42 (c = 1.0, CHCl<sub>3</sub>).

**(S)-2-(3,4-dimethoxybenzyl)-3-(pyridin-4-yl)propan-1-ol (alcohol of aldehyde 20)**

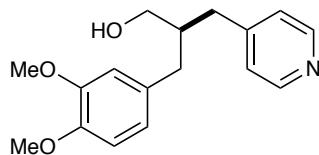

Prepared according to General Procedure A, irradiating for 5 hours. Following workup, the crude aldehyde was reduced without purification, and the resulting alcohol was purified by flash chromatography using a methanol/CH<sub>2</sub>Cl<sub>2</sub> eluent (0 → 0.5%) containing 0.5% triethylamine to afford a clear, colorless oil (123 mg, 86% yield).

**<sup>1</sup>H NMR (500 MHz, CDCl<sub>3</sub>):** δ 8.44 (d, *J* = 5.1 Hz, 2H), 7.10 (d, *J* = 5.2 Hz, 2H), 3.49 (m, 2H), 2.82 (dd, *J* = 13.4, 6.0 Hz, 2H), 2.38 (dd, *J* = 13.4, 8.5 Hz, 1H), 1.96 (dq, *J* = 12.9, 6.6 Hz, 1H), 0.88 (d, *J* = 6.9 Hz, 3H).

**<sup>13</sup>C NMR (126 MHz, CDCl<sub>3</sub>):** δ 150.3, 149.5, 124.8, 67.0, 39.0, 37.2, 16.4.

**IR (film):** ν 3252, 3000, 2927, 2835, 1603, 1558, 1514, 1464, 1451, 1417, 1333, 1260, 1235, 1192, 1155, 1139, 1090, 1070, 1027, 1004, 956, 945, 912, 859, 841, 807, 791, 765, 727 cm<sup>-1</sup>.

**HRMS (ESI-TOF):** *m/z* calculated for C<sub>17</sub>H<sub>21</sub>NO<sub>3</sub> [M+H]<sup>+</sup> 288.1594, found 288.1592.

**Chiral HPLC:** OD-H column, 15% isopropanol/hexanes, 1.0 mL/min, 98% ee. *t*<sub>R</sub> = 29.6 min (minor (*R*)-enantiomer), 32.9 min (major (*S*)-enantiomer).

**[α]<sub>D</sub><sup>20</sup>:** -4.6 (*c* = 1.0, CH<sub>2</sub>Cl<sub>2</sub>).

**(S)-2-cyclohexyl-3-(pyridin-4-yl)propanal (21)**

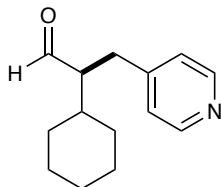

Prepared according to General Procedure A, irradiating for 12 hours, and using 5 equiv of cyclohexylacetaldehyde. The aldehyde was purified by flash chromatography using an ethyl acetate/toluene eluent (20%) to afford a clear, colorless oil (93 mg, 86% yield). The corresponding alcohol was purified by flash chromatography using an ethyl acetate/hexanes eluent (60%) containing 1% triethylamine followed by preparative thin layer chromatography (70% ethyl acetate/hexanes + 1% triethylamine) to afford a pale yellow oil.

**<sup>1</sup>H NMR (500 MHz, CDCl<sub>3</sub>):** δ 9.68 (d, *J* = 2.3 Hz, 1H), 8.46 (m, 2H), 7.07 (m, 2H), 3.00 (dd, *J* = 14.1, 9.2 Hz, 1H), 2.69 (dd, *J* = 14.2, 4.6 Hz, 1H), 2.55 (dtd, *J* = 9.3, 4.7, 2.3 Hz, 1H), 1.87 – 1.60 (m, 6H), 1.35 – 1.07 (m, 5H).

**<sup>13</sup>C NMR (126 MHz, CDCl<sub>3</sub>):** δ 203.9, 150.0, 149.3, 124.4, 58.6, 38.6, 31.1, 30.6, 30.3, 26.5, 26.5, 26.3

**IR (film):** ν 3068, 3026, 2924, 2853, 2716, 1721, 1600, 1559, 1496, 1448, 1416, 1396, 1371, 1351, 1264, 1220, 1172, 1070, 1047, 993, 913, 890, 878, 855, 837, 799, 731, 668 cm<sup>-1</sup>.

**HRMS (ESI-TOF):** *m/z* calculated for C<sub>14</sub>H<sub>19</sub>NO [M+H]<sup>+</sup> 218.1539, found 218.1541.

**Chiral HPLC (alcohol):** AS-H column, 5% isopropanol/hexanes, 1.0 mL/min, 96% ee. *t<sub>R</sub>* = 20.7 min (major (*R*)-enantiomer), 27.1 min (minor (*S*)-enantiomer).

**[α]<sub>D</sub><sup>20</sup> (alcohol):** -13.0 (c = 1.0, CH<sub>2</sub>Cl<sub>2</sub>).

***tert*-butyl (*S*)-4-(1-hydroxy-3-(pyridin-4-yl)propan-2-yl)piperidine-1-carboxylate (alcohol of aldehyde 22)**

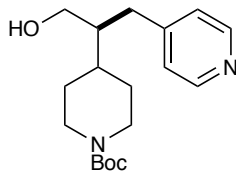

Prepared according to General Procedure A, irradiating for 12 hours, and using 5 equiv of *tert*-butyl 4-(2-oxoethyl)-1-carboxylate. Following workup, the crude aldehyde was reduced without purification, and the resulting alcohol was purified by flash chromatography using a methanol/CH<sub>2</sub>Cl<sub>2</sub> eluent (2.5 → 5%) to afford a clear, colorless oil (127 mg, 80% yield).

**<sup>1</sup>H NMR (500 MHz, CDCl<sub>3</sub>):** δ 8.47 (m, 2H), 7.11 (m, 2H), 4.15 (br s, 2H), 3.53 (m, 2H), 2.78 – 2.50 (m, 4H), 1.67 (m, 4H), 1.45 (s, 9H), 1.28 (m, 2H).

**<sup>13</sup>C NMR (126 MHz, CDCl<sub>3</sub>):** δ 154.9, 150.65, 150.58, 149.79, 149.75, 124.71, 124.69, 79.5, 61.51, 61.46, 46.8, 44.20, 44.10, 36.8, 33.9, 29.4, 28.6.

**IR (film):** ν 3382, 2978, 2930, 2860, 2241, 1647, 1603, 1559, 1476, 1467, 1421, 1393, 1365, 1297, 1280, 1264, 1240, 1164, 1143, 1070, 1039, 1003, 980, 913, 865, 829, 809, 770, 728 cm<sup>-1</sup>.

**HRMS (ESI-TOF):** m/z calculated for C<sub>18</sub>H<sub>28</sub>N<sub>2</sub>O<sub>3</sub> [M+H]<sup>+</sup> 321.2173, found 321.2173.

**Chiral HPLC:** AD-H column, 10% isopropanol/hexanes, 1.0 mL/min, 94% ee. *t*<sub>R</sub> = 13.5 min (major (*S*)-enantiomer), 19.8 min (minor (*R*)-enantiomer).

**[α]<sub>D</sub><sup>20</sup>:** +7.7 (c = 1.0, CH<sub>2</sub>Cl<sub>2</sub>).

**(R)-2-(pyridin-4-ylmethyl)octanal (23)<sup>1</sup>**

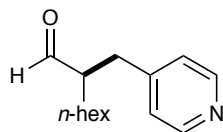

Prepared according to General Procedure A, irradiating for 5 hours. The aldehyde was purified by flash chromatography using an ethyl acetate/hexanes eluent (40%) to afford a clear, colorless oil (99 mg, 90% yield). The corresponding alcohol was purified by flash chromatography using an ethyl acetate/hexanes eluent (65%) containing 1% triethylamine followed by preparative thin layer chromatography (75% ethyl acetate/hexanes + 1% triethylamine) to afford a clear, colorless oil.

**<sup>1</sup>H NMR (500 MHz, CDCl<sub>3</sub>):**  $\delta$  9.64 (t,  $J$  = 1.7 Hz, 1H), 8.48 (dt,  $J$  = 4.4, 1.5 Hz, 2H), 7.08 (d,  $J$  = 5.5 Hz, 2H), 2.98 (m, 1H), 2.66 (m, 2H), 1.65 (m, 1H), 1.46 (m, 1H), 1.40 – 1.16 (m, 8H), 0.85 (t,  $J$  = 6.9 Hz, 3H).

**<sup>13</sup>C NMR (126 MHz, CDCl<sub>3</sub>):**  $\delta$  203.6, 150.0, 148.3, 124.4, 52.6, 34.0, 31.6, 29.3, 28.7, 26.9, 22.6, 14.1.

**IR (film):**  $\nu$  3068, 3028, 2927, 2857, 2716, 1724, 1601, 1559, 1497, 1461, 1415, 1391, 1378, 1220, 1123, 1090, 1071, 1047, 993, 961, 850, 833, 792, 724 cm<sup>-1</sup>.

**HRMS (ESI-TOF):**  $m/z$  calculated for C<sub>14</sub>H<sub>21</sub>NO [M+H]<sup>+</sup> 220.1696, found 220.1695.

**Chiral HPLC (alcohol):** OD-H column, 5% isopropanol/hexanes, 1.0 mL/min, 96% ee.  $t_R$  = 16.2 min (minor (*S*)-enantiomer), 18.8 min (major (*R*)-enantiomer).

**$[\alpha]_D^{20}$  (alcohol):** +7.4 ( $c$  = 1.0, CH<sub>2</sub>Cl<sub>2</sub>).



**(*R*)-2-methyl-3-(pyridin-4-yl)propan-1-ol (alcohol of aldehyde 24)**

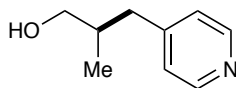

Prepared according to General Procedure A, irradiating for 5 hours.  $^1\text{H}$  NMR analysis of an aliquot of the reaction showed 93% yield of the aldehyde vs. 2,6-lutidine. Following workup, the crude aldehyde was reduced without purification, and the resulting alcohol was purified by flash chromatography using a ethyl acetate/hexanes eluent (65%) containing 1% triethylamine followed by preparative thin layer chromatography (ethyl acetate + 1% triethylamine) to afford a pale yellow oil. The alcohol remained contaminated with  $\sim 10\%$  of the organocatalyst which proved inseparable, so this material was fully characterized. NMR signals attributable to the organocatalyst are not listed.

$^1\text{H}$  NMR (500 MHz,  $\text{CDCl}_3$ ):  $\delta$  8.44 (d,  $J = 5.1$  Hz, 2H), 7.10 (d,  $J = 5.2$  Hz, 2H), 3.49 (m, 2H), 2.82 (dd,  $J = 13.4, 6.0$  Hz, 2H), 2.38 (dd,  $J = 13.4, 8.5$  Hz, 1H), 1.96 (dq,  $J = 12.9, 6.6$  Hz, 1H), 0.88 (d,  $J = 6.9$  Hz, 3H).

$^{13}\text{C}$  NMR (126 MHz,  $\text{CDCl}_3$ ):  $\delta$  150.3, 149.5, 124.8, 67.0, 39.0, 37.2, 16.4.

IR (film):  $\nu$  3276, 3063, 3028, 2958, 2925, 2872, 1679, 1603, 1558, 1497, 1455, 1417, 1382, 1262, 1221, 1186, 1134, 1094, 1041, 1002, 991, 916, 887, 848, 837, 827, 787, 730, 701  $\text{cm}^{-1}$ .

HRMS (ESI-TOF):  $m/z$  calculated for  $\text{C}_9\text{H}_{13}\text{NO}$   $[\text{M}+\text{H}]^+$  152.1070, found 152.1071.

Chiral HPLC: AS-H column, 10% isopropanol/hexanes, 1.0 mL/min, 96% ee.  $t_R = 13.7$  min (minor (*S*)-enantiomer), 16.4 min (major (*R*)-enantiomer).

$[\alpha]_D^{21}$ : +12.1 ( $c = 0.5$ ,  $\text{CH}_2\text{Cl}_2$ ).

**(*R,Z*)-2-(pyridin-4-ylmethyl)non-6-enal (25)**

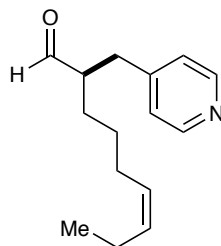

Prepared according to General Procedure A, irradiating for 5 hours. The aldehyde was purified by flash chromatography using an ethyl acetate/hexanes eluent (40%) to afford a clear, colorless oil (98 mg, 85% yield). Quantitative  $^{13}\text{C}$  NMR analysis of the aldehyde showed a 4.5:1 *Z/E* mixture of alkene isomers. The corresponding alcohol was purified by flash chromatography using an ethyl acetate/hexanes eluent (70%) containing 1% triethylamine followed by preparative thin layer chromatography (75% ethyl acetate/hexanes + 1% triethylamine) to afford a pale yellow oil. The 4 stereoisomers could not be separated by HPLC, so the alkenyl alcohol (50 mg) was dissolved in methanol (1 mL), palladium (10 wt% on carbon, 5 mg) was added, and the mixture was stirred under hydrogen (balloon, 1 atm). After 12 hours, the mixture was filtered through Celite®, washed with methanol (20 mL), and concentrated. The resulting (*R*)-2-(pyridin-4-ylmethyl)nonan-1-ol was sufficiently pure for determination of optical properties.

**$^1\text{H}$  NMR (500 MHz,  $\text{CDCl}_3$ ):**  $\delta$  9.65 (s, 1H), 8.49 (d,  $J = 6.0$  Hz, 2H), 7.08 (d,  $J = 6.0$  Hz, 2H), 5.48 – 5.16 (m, 2H), 2.98 (m, 1H), 2.67 (m, 2H), 1.99 (m, 4H), 1.65 (m, 1H), 1.56 – 1.29 (m, 3H), 0.93 (t,  $J = 7.6$  Hz, 3H).

**$^{13}\text{C}$  NMR (126 MHz,  $\text{CDCl}_3$ ):** 4.5:1 mixture of isomers; *Z* isomer  $\delta$  203.37, 149.99, 148.20, 132.63, 127.95, 124.38, 52.45, 33.98, 28.23, 26.97, 26.90, 20.6, 14.40; *E* isomer  $\delta$  203.43, 149.97, 148.25, 133.08, 128.03, 124.38, 52.41, 33.93, 32.38, 28.04, 26.72, 25.62, 13.98.

**IR (film):**  $\nu$  3004, 2962, 2932, 2859, 2716, 1724, 1601, 1559, 1497, 1458, 1415, 1372, 1304, 1220, 1070, 993, 968, 912, 855, 828, 792, 731  $\text{cm}^{-1}$ .

**HRMS (ESI-TOF):**  $m/z$  calculated for  $C_{15}H_{21}NO$   $[M+H]^+$  232.1696, found 232.1698.

**Chiral HPLC (alcohol, alkene reduced):** OD-H column, 3% isopropanol/hexanes, 1.0 mL/min, 95% ee.  $t_R$  = 29.3 min (minor (*S*)-enantiomer), 33.6 min (major (*R*)-enantiomer).

**$[\alpha]_D^{21}$  (alcohol, alkene reduced):**  $-5.2$  ( $c = 1.0$ ,  $CH_2Cl_2$ ).

**(*R*)-2-(pyridin-4-ylmethyl)dodec-9-ynal (26)**

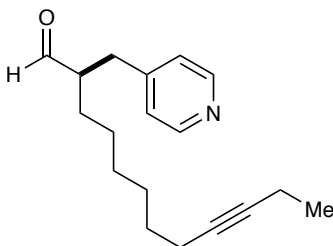

Prepared according to General Procedure A, irradiating for 5 hours. The aldehyde was purified by flash chromatography using an ethyl acetate/hexanes eluent (40%) to afford a clear, colorless oil (121 mg, 89% yield). The corresponding alcohol was purified by flash chromatography using an ethyl acetate/hexanes eluent (50%) containing 1% triethylamine followed by preparative thin layer chromatography (60% ethyl acetate/hexanes + 1% triethylamine) to afford a pale yellow oil.

**<sup>1</sup>H NMR (500 MHz, CDCl<sub>3</sub>):** δ 9.64 (s, 1H), 8.48 (d, *J* = 5.0 Hz, 2H), 7.08 (d, *J* = 5.1 Hz, 2H), 2.98 (m, 1H), 2.65 (m, 2H), 2.12 (m, 4H), 1.65 (m, 1H), 1.54 – 1.38 (m, 3H), 1.38 – 1.19 (m, 6H), 1.08 (t, *J* = 7.4 Hz, 3H).

**<sup>13</sup>C NMR (126 MHz, CDCl<sub>3</sub>):** δ 203.5, 150.0, 148.3, 124.4, 81.9, 79.4, 52.5, 34.0, 29.2, 29.0, 28.7, 28.6, 26.8, 18.7, 14.5, 12.5.

**IR (film):** ν 2975, 2931, 2857, 2715, 1724, 1601, 1559, 1497, 1461, 1416, 1320, 1220, 1070, 993, 912, 847, 832, 791, 730 cm<sup>-1</sup>.

**HRMS (ESI-TOF):** *m/z* calculated for C<sub>18</sub>H<sub>25</sub>NO [M+H]<sup>+</sup> 272.2009, found 272.2009.

**Chiral HPLC (alcohol):** OD-H column, 5% isopropanol/hexanes, 1.0 mL/min, 96% ee. *t*<sub>R</sub> = 21.1 min (minor (*S*)-enantiomer), 26.0 min (major (*R*)-enantiomer).

**[α]<sub>D</sub><sup>22</sup> (alcohol):** -1.7 (c = 0.5, CH<sub>2</sub>Cl<sub>2</sub>).

**(*R*)-2-benzyl-3-(2-methylpyridin-4-yl)propionaldehyde (27)**

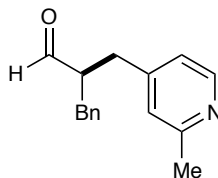

Prepared according to General Procedure A, irradiating for 5 hours. The aldehyde was purified by flash chromatography using an ethyl acetate/hexanes eluent (25 → 40%) containing 1% triethylamine to afford a clear, colorless oil (98 mg, 82% yield). The corresponding alcohol was purified by flash chromatography using an ethyl acetate/hexanes eluent (35 → 75%) containing 1% triethylamine followed by preparative thin layer chromatography (60% ethyl acetate/hexanes + 1% triethylamine) to afford a pale yellow oil.

**<sup>1</sup>H NMR (500 MHz, CDCl<sub>3</sub>):** δ 9.71 (d, *J* = 1.4 Hz, 1H), 8.37 (d, *J* = 5.1 Hz, 1H), 7.29 (app t, 2H), 7.23 (m, 1H), 7.14 (m, 2H), 6.91 (s, 1H), 6.86 (d, *J* = 4.4 Hz, 1H), 3.01 (m, 2H), 2.94 (dd, *J* = 13.8, 7.3 Hz, 1H), 2.75 (m, 1H), 2.65 (dd, *J* = 14.0, 5.3 Hz, 1H), 2.50 (s, 3H).

**<sup>13</sup>C NMR (126 MHz, CDCl<sub>3</sub>):** δ 203.0, 158.7, 149.4, 148.23, 138.0, 129.1, 128.8, 126.9, 124.0, 121.5, 54.02, 35.2, 33.9, 24.5.

**IR (film):** ν 3062, 3027, 2923, 2854, 2725, 1723, 1603, 1561, 1496, 1454, 1406, 1295, 1195, 1168, 1076, 1031, 997, 911, 845, 822, 745, 731, 700 cm<sup>-1</sup>.

**HRMS (ESI-TOF):** *m/z* calculated for C<sub>16</sub>H<sub>17</sub>NO [M+H]<sup>+</sup> 239.1383, found 239.1381.

**Chiral HPLC (alcohol):** AD-H column, 5% ethanol/hexanes, 1.0 mL/min, 98% ee. *t<sub>R</sub>* = 25.4 min (minor (*S*)-enantiomer), 27.4 min (major (*R*)-enantiomer).

**[α]<sub>D</sub><sup>20</sup> (alcohol):** +0.29 (c = 1.0, CH<sub>2</sub>Cl<sub>2</sub>).

**(R)-2-benzyl-3-(2,6-dimethylpyridin-4-yl)propionaldehyde (28)**

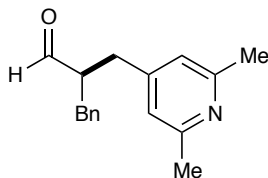

Prepared according to General Procedure A, irradiating for 5 hours. The aldehyde was purified by flash chromatography using an ethyl acetate/hexanes eluent (25%) containing 1% triethylamine to afford a clear, colorless oil (92 mg, 73% yield). The corresponding alcohol was purified by flash chromatography using an ethyl acetate/hexanes eluent (30 → 50%) containing 1% triethylamine followed by preparative thin layer chromatography (50% ethyl acetate/hexanes + 1% triethylamine) to afford a pale yellow oil.

**<sup>1</sup>H NMR (500 MHz, CDCl<sub>3</sub>):** δ 9.70 (d, *J* = 1.5 Hz, 1H), 7.29 (m, 2H), 7.22 (m, 1H), 7.14 (m, 2H), 6.72 (s, 2H), 3.04 – 2.95 (m, 2H), 2.89 (m, 1H), 2.78 – 2.69 (m, 1H), 2.65 – 2.58 (m, 1H), 2.47 (s, 6H).

**<sup>13</sup>C NMR (126 MHz, CDCl<sub>3</sub>):** δ 203.2, 158.0, 148.4, 138.1, 129.1, 128.8, 126.8, 120.9, 54.0, 35.2, 33.9, 24.5.

**IR (film):** ν 3029, 2925, 2853, 2727, 2253, 2204, 1725, 1608, 1568, 1497, 1449, 1382, 1223, 1077, 1030, 996, 908, 867, 727, 700 cm<sup>-1</sup>.

**HRMS (ESI-TOF):** *m/z* calculated for C<sub>17</sub>H<sub>19</sub>NO [M+H]<sup>+</sup> 254.1539, found 254.1540.

**Chiral HPLC (alcohol):** AS-H column, 5% isopropanol/hexanes, 1.0 mL/min, 98% ee. *t<sub>R</sub>* = 11.0 min (major (*R*)-enantiomer), 17.8 min (minor (*S*)-enantiomer).

**[α]<sub>D</sub><sup>20</sup> (alcohol):** –8.3 (c = 1.0, CH<sub>2</sub>Cl<sub>2</sub>).

**(*R*)-2-benzyl-3-(2-phenylpyridin-4-yl)propionaldehyde (29)**

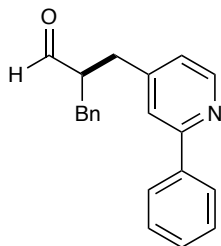

Prepared according to General Procedure A, irradiating for 24 hours. The aldehyde was purified by flash chromatography using an ethyl acetate/hexanes eluent (10 → 20%) containing 1% triethylamine to afford a clear, colorless oil (112 mg, 74% yield). The corresponding alcohol was purified by flash chromatography using an ethyl acetate/hexanes eluent (50 → 100%) containing 1% triethylamine followed by preparative thin layer chromatography (ethyl acetate + 1% triethylamine) to afford a pale yellow oil.

**<sup>1</sup>H NMR (500 MHz, CDCl<sub>3</sub>):** δ 9.71 (s, 1H), 8.54 (d, *J* = 5.0 Hz, 1H), 7.92 (d, *J* = 7.5 Hz, 2H), 7.44 (m, 3H), 7.38 (t, *J* = 7.3 Hz, 1H), 7.27 (t, *J* = 7.5 Hz, 2H), 7.20 (t, *J* = 7.5 Hz, 1H), 7.12 (d, *J* = 7.5 Hz, 2H), 6.96 (d, *J* = 4.3 Hz, 1H), 3.13 – 2.97 (overlapping signals, 3H), 2.74 (m, 2H).

**<sup>13</sup>C NMR (126 MHz, CDCl<sub>3</sub>):** δ 202.9, 157.7, 149.8, 148.8, 139.2, 137.9, 129.1, 129.1, 128.8, 128.8, 127.0, 126.9, 122.8, 121.3, 54.0, 35.1, 33.9.

**IR (film):** ν 3061, 3029, 2924, 2833, 2723, 1723, 1599, 1581, 1556, 1496, 1475, 1446, 1405, 1074, 1029, 991, 906, 847, 776, 735, 696 cm<sup>-1</sup>.

**HRMS (ESI-TOF):** *m/z* calculated for C<sub>21</sub>H<sub>19</sub>NO [M+H]<sup>+</sup> 302.1539, found 302.1538.

**Chiral HPLC (alcohol):** AD-H column, 8% ethanol/hexanes, 1.0 mL/min, 97% ee. *t<sub>R</sub>* = 13.0 min (minor (*S*)-enantiomer), 15.0 min (major (*R*)-enantiomer).

**[α]<sub>D</sub><sup>20</sup> (alcohol):** +2.2 (c = 1.0, CH<sub>2</sub>Cl<sub>2</sub>).

**(R)-N-(4-(2-benzyl-3-oxopropyl)pyridin-2-yl)acetamide (30)**

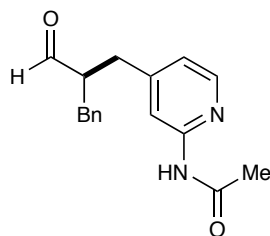

Prepared according to General Procedure A, irradiating for 24 hours. The aldehyde was purified by flash chromatography using an ethyl acetate/hexanes eluent (25 → 60%) containing 1% triethylamine to afford a white semisolid (102 mg, 72% yield). The corresponding alcohol was purified by flash chromatography using an ethyl acetate/hexanes eluent (15 → 35%) containing 1% triethylamine followed by preparative thin layer chromatography (ethyl acetate + 1% triethylamine) to afford a pale yellow oil.

**<sup>1</sup>H NMR (500 MHz, CDCl<sub>3</sub>):** δ 9.71 (s, 1H), 8.88 (s, 1H), 8.12 (m, 2H), 7.35 – 7.19 (m, 3H), 7.15 (d, *J* = 5.0 Hz, 2H), 6.83 (s, 1H), 3.13 – 2.93 (m, 3H), 2.85 – 2.65 (m, 2H), 2.18 (d, *J* = 2.9 Hz, 3H).

**<sup>13</sup>C NMR (126 MHz, CDCl<sub>3</sub>):** δ 203.1, 169.0, 152.0, 151.0, 147.7, 137.9, 129.1, 128.8, 126.9, 120.7, 114.4, 53.8, 35.2, 34.3, 24.9.

**IR (film):** ν 3211, 3030, 2929, 1725, 1696, 1611, 1567, 1533, 1497, 1422, 1368, 1296, 1264, 1239, 1163, 1025, 966, 909, 844, 736, 701 cm<sup>-1</sup>.

**HRMS (ESI-TOF):** *m/z* calculated for C<sub>17</sub>H<sub>18</sub>N<sub>2</sub>O<sub>2</sub> [M+H]<sup>+</sup> 282.1441, found 282.1442.

**Chiral HPLC (alcohol):** AS-H column, 5% ethanol/hexanes, 1.0 mL/min, 98% ee. *t*<sub>R</sub> = 10.8 min (major (*R*)-enantiomer), 24.2 min (minor (*S*)-enantiomer).

**[α]<sub>D</sub><sup>20</sup> (alcohol):** -1.8 (c = 1.0, CH<sub>2</sub>Cl<sub>2</sub>).



**(R)-2-benzyl-3-(3-methylpyridin-4-yl)propionaldehyde (31)**

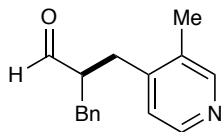

Prepared according to General Procedure A, irradiating for 5 hours. The aldehyde was purified by flash chromatography using an ethyl acetate/hexanes eluent (20 → 40%) containing 1% triethylamine to afford a clear, colorless oil (90 mg, 75% yield). The corresponding alcohol was purified by flash chromatography using a methanol/CH<sub>2</sub>Cl<sub>2</sub> eluent (0 → 0.5%) containing 0.5% triethylamine to afford a pale yellow oil.

**<sup>1</sup>H NMR (500 MHz, CDCl<sub>3</sub>):** δ 9.71 (s, 1H), 8.32 (overlapping signals, 2H), 7.28 (app t, 2H), 7.22 (t, *J* = 7.5 Hz, 1H), 7.14 (d, *J* = 7.5 Hz, 2H), 6.99 (d, *J* = 5.1 Hz, 1H), 3.06 (dd, *J* = 13.7, 6.5 Hz, 1H), 3.01 – 2.91 (m, 2H), 2.73 (dd, *J* = 13.8, 6.3 Hz, 1H), 2.64 (q, *J* = 9.3 Hz, 1H), 2.12 (s, 3H).

**<sup>13</sup>C NMR (126 MHz, CDCl<sub>3</sub>):** δ 202.8, 151.1, 147.6, 146.2, 137.9, 131.9, 129.1, 128.8, 126.9, 124.0, 53.1, 35.4, 30.9, 16.2.

**IR (film):** ν 3062, 3027, 2925, 2855, 2727, 1723, 1594, 1561, 1495, 1454, 1404, 1309, 1195, 1076, 1064, 1031, 1000, 913, 880, 845, 819, 747, 732, 700 cm<sup>-1</sup>.

**HRMS (ESI-TOF):** *m/z* calculated for C<sub>16</sub>H<sub>17</sub>NO [M+H]<sup>+</sup> 239.1383, found 239.1382.

**Chiral HPLC (alcohol):** AD-H column, 10% ethanol/hexanes, 1.0 mL/min, 98% ee. *t*<sub>R</sub> = 11.6 min (minor (*S*)-enantiomer), 13.8 min (major (*R*)-enantiomer).

**[α]<sub>D</sub><sup>21</sup> (alcohol):** -8.3 (c = 0.33, CH<sub>2</sub>Cl<sub>2</sub>).

**(R)-2-benzyl-3-(3-methoxypyridin-4-yl)propionaldehyde (32)**

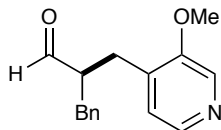

Prepared according to General Procedure A, irradiating for 24 hours. The aldehyde was purified by flash chromatography using an ethyl acetate/hexanes eluent (30 → 50%) containing 1% triethylamine to afford a pale orange oil (90 mg, 71% yield). The corresponding alcohol was purified by flash chromatography using an ethyl acetate/hexanes eluent (40 → 70%) containing 1% triethylamine followed by preparative thin layer chromatography (80% ethyl acetate/hexanes + 1% triethylamine) to afford a pale orange oil.

**<sup>1</sup>H NMR (500 MHz, CDCl<sub>3</sub>):** δ 9.68 (d, *J* = 1.6 Hz, 1H), 8.19 (s, 1H), 8.15 (d, *J* = 4.7 Hz, 1H), 7.29 (t, *J* = 7.3 Hz, 2H), 7.21 (t, *J* = 7.3 Hz, 1H), 7.14 (d, *J* = 6.8 Hz, 2H), 7.00 (d, *J* = 4.6 Hz, 1H), 3.86 (s, 3H), 3.09 – 2.92 (m, 3H), 2.78 – 2.67 (m, 2H).

**<sup>13</sup>C NMR (126 MHz, CDCl<sub>3</sub>):** δ 203.3, 153.9, 142.7, 138.3, 135.9, 133.0, 129.1, 128.7, 126.7, 125.4, 55.9, 52.6, 35.2, 29.1.

**IR (film):** ν 3027, 2931, 2841, 2719, 1725, 1595, 1567, 1498, 1455, 1417, 1269, 1212, 1182, 1073, 1025, 910, 840, 824, 731, 701 cm<sup>-1</sup>.

**HRMS (ESI-TOF):** *m/z* calculated for C<sub>16</sub>H<sub>17</sub>NO<sub>2</sub> [M+H]<sup>+</sup> 256.1332, found 256.1332.

**Chiral HPLC (alcohol):** AS-H column, 5% ethanol/hexanes, 1.0 mL/min, 98% ee. *t*<sub>R</sub> = 15.9 min (major (*R*)-enantiomer), 18.9 min (minor (*S*)-enantiomer).

**[α]<sub>D</sub><sup>21</sup> (alcohol):** +1.1 (c = 1.0, CH<sub>2</sub>Cl<sub>2</sub>).

**(R)-2-benzyl-3-(3-fluoropyridin-4-yl)propionaldehyde (33)**

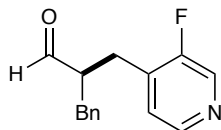

Prepared according to General Procedure A, irradiating for 36 hours, and using 5 equiv of hydrocinnamaldehyde. The aldehyde was purified by flash chromatography using an ethyl acetate/hexanes eluent (10 → 25%) containing 1% triethylamine, followed by preparative thin layer chromatography (50% ethyl acetate/hexanes + 1% triethylamine) to afford a pale yellow oil (95 mg, 78% yield). The corresponding alcohol was purified by flash chromatography using an ethyl acetate/hexanes eluent (25 → 40%) containing 1% triethylamine followed by preparative thin layer chromatography (60% ethyl acetate/hexanes + 1% triethylamine) to afford an oil.

**<sup>1</sup>H NMR (500 MHz, CDCl<sub>3</sub>):** δ 9.70 (s, 1H), 8.36 (d, *J* = 1.7 Hz, 1H), 8.28 (d, *J* = 4.9 Hz, 1H), 7.29 (t, *J* = 7.5 Hz, 2H), 7.23 (m, 1H), 7.15 (d, *J* = 7.2 Hz, 2H), 7.09 (m, 1H), 3.13 – 2.97 (m, 3H), 2.77 (m, 2H).

**<sup>13</sup>C NMR (126 MHz, CDCl<sub>3</sub>):** δ 202.4, 158.4 (d, *J* = 254.9 Hz), 145.8 (d, *J* = 5.1 Hz), 138.1 (d, *J* = 24.6 Hz), 137.6, 134.8 (d, *J* = 13.1 Hz), 128.9 (d, *J* = 21.7 Hz), 127.0, 125.8 (d, *J* = 1.9 Hz), 52.8, 35.4, 27.4 (d, *J* = 2.0 Hz).

**IR (film):** ν 3058, 3029, 2925, 2832, 2727, 1724, 1606, 1562, 1494, 1455, 1415, 1246, 1237, 1196, 1142, 1076, 1057, 1030, 913, 881, 841, 778, 747, 699 cm<sup>-1</sup>.

**HRMS (ESI-TOF):** *m/z* calculated for C<sub>15</sub>H<sub>14</sub>FNO [M+H]<sup>+</sup> 244.1132, found 244.1128.

**Chiral HPLC (alcohol):** AS-H column, 10% isopropanol/hexanes, 1.0 mL/min, 96% ee. *t<sub>R</sub>* = 9.6 min (major (*R*)-enantiomer), 13.2 min (minor (*S*)-enantiomer).

**[α]<sub>D</sub><sup>21</sup> (alcohol):** -0.13 (c = 1.0, CH<sub>2</sub>Cl<sub>2</sub>).

**(*R*)-2-benzyl-3-(3-chloropyridin-4-yl)propionaldehyde (34)**

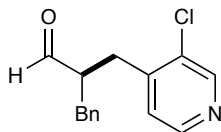

Prepared according to General Procedure A, irradiating for 36 hours, and using 5 equiv of hydrocinnamaldehyde. The aldehyde was purified by flash chromatography using an ethyl acetate/hexanes eluent (10 → 20%) containing 1% triethylamine, followed by preparative thin layer chromatography (50% ethyl acetate/hexanes + 1% triethylamine) to afford a clear, colorless oil (89 mg, 69% yield). The corresponding alcohol was purified by flash chromatography using an ethyl acetate/hexanes eluent (20 → 35%) containing 1% triethylamine followed by preparative thin layer chromatography (50% ethyl acetate/hexanes + 1% triethylamine) to afford a pale yellow oil.

**<sup>1</sup>H NMR (500 MHz, CDCl<sub>3</sub>):** δ 9.71 (s, 1H), 8.51 (s, 1H), 8.35 (d, *J* = 5.0 Hz, 1H), 7.30 (t, *J* = 7.4 Hz, 2H), 7.24 (t, *J* = 7.3 Hz, 1H), 7.17 (d, *J* = 7.5 Hz, 2H), 7.12 (d, *J* = 5.0 Hz, 1H), 3.18 – 3.01 (m, 3H), 2.86 – 2.74 (m, 2H).

**<sup>13</sup>C NMR (126 MHz, CDCl<sub>3</sub>):** δ 202.5, 149.7, 147.8, 145.8, 137.6, 132.2, 129.1, 128.9, 127.0, 126.0, 52.5, 35.6, 31.7.

**IR (ATR):** ν 3059, 3028, 2926, 2834, 2728, 1724, 1601, 1585, 1497, 1479, 1455, 1399, 1294, 1221, 1176, 1095, 1077, 1035, 915, 881, 842, 818, 751, 735, 700 cm<sup>-1</sup>.

**HRMS (ESI-TOF):** *m/z* calculated for C<sub>15</sub>H<sub>14</sub>ClNO [M+H]<sup>+</sup> 260.0837, found 260.0835.

**Chiral HPLC (alcohol):** AS-H column, 10% isopropanol/hexanes, 1.0 mL/min, 94% ee. *t<sub>R</sub>* = 8.6 min (major (*R*)-enantiomer), 10.5 min (minor (*S*)-enantiomer).

**[α]<sub>D</sub><sup>20</sup> (alcohol):** −14.0 (c = 1.0, CH<sub>2</sub>Cl<sub>2</sub>).

**(*R*)-2-benzyl-3-(4-quinolinyl)propan-1-ol (alcohol of aldehyde 35)**

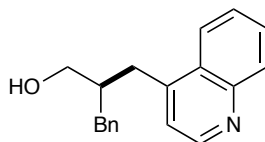

Prepared according to General Procedure A, irradiating for 24 hours. Following workup, the crude aldehyde was reduced without purification, and the resulting alcohol was purified by flash chromatography using a methanol/CH<sub>2</sub>Cl<sub>2</sub> eluent (0 → 0.5%) containing 0.5% triethylamine to afford a pale yellow syrup (114 mg, 83% yield).

**<sup>1</sup>H NMR (500 MHz, CDCl<sub>3</sub>):** δ 8.65 (d, *J* = 4.5 Hz, 1H), 8.05 (d, *J* = 8.5 Hz, 1H), 7.76 (d, *J* = 8.5 Hz, 1H), 7.63 (t, *J* = 7.3 Hz, 1H), 7.41 (t, *J* = 7.7 Hz, 1H), 7.29 (t, *J* = 7.4 Hz, 2H), 7.24 – 7.13 (m, 4H), 3.54 (d, *J* = 4.9 Hz, 2H), 3.29 (br s, 1H), 3.17 (dd, *J* = 13.8, 8.4 Hz, 1H), 3.04 (dd, *J* = 13.7, 5.8 Hz, 1H), 2.90 (dd, *J* = 13.6, 7.3 Hz, 1H), 2.68 (dd, *J* = 13.6, 7.3 Hz, 1H), 2.25 (tdd, *J* = 12.7, 7.3, 4.9 Hz, 1H).

**<sup>13</sup>C NMR (126 MHz, CDCl<sub>3</sub>):** δ 149.7, 148.2, 147.5, 140.2, 129.8, 129.3, 129.2, 128.5, 127.8, 126.4, 126.3, 123.9, 122.2, 63.6, 44.0, 38.1, 33.4.

**IR (film):** ν 3237, 3062, 3027, 2921, 2861, 1590, 1573, 1509, 1495, 1453, 1424, 1393, 1359, 1308, 1242, 1151, 1089, 1044, 1028, 1012, 952, 907, 854, 825, 813, 762, 728, 699 cm<sup>-1</sup>.

**HRMS (ESI-TOF):** *m/z* calculated for C<sub>19</sub>H<sub>19</sub>NO [M+H]<sup>+</sup> 278.1539, found 278.1537.

**Chiral HPLC:** AS-H column, 10% isopropanol/hexanes, 1.0 mL/min, 96% ee. *t*<sub>R</sub> = 10.3 min (major (*R*)-enantiomer), 15.1 min (minor (*S*)-enantiomer).

**[α]<sub>D</sub><sup>20</sup>:** +8.2 (c = 1.0, CH<sub>2</sub>Cl<sub>2</sub>).

**(*R*)-2-benzyl-3-(2-methylquinolin-4-yl)propionaldehyde (36)**

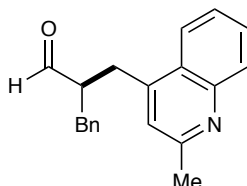

Prepared according to General Procedure A, irradiating for 24 hours. The aldehyde was purified by flash chromatography using an ethyl acetate/hexanes eluent (10 → 25%) containing 1% triethylamine to afford a clear, colorless syrup (109 mg, 75% yield). The corresponding alcohol was purified by flash chromatography using an ethyl acetate/hexanes eluent (50%) containing 1% triethylamine to afford a white solid.

**<sup>1</sup>H NMR (500 MHz, CDCl<sub>3</sub>):** δ 9.75 (s, 1H), 8.01 (d, *J* = 8.4 Hz, 1H), 7.64 (t, *J* = 7.6 Hz, 1H), 7.57 (d, *J* = 8.4 Hz, 1H), 7.40 (m, 1H), 7.33 (t, *J* = 7.4 Hz, 2H), 7.27 (m, 1H), 7.18 (d, *J* = 7.1 Hz, 2H), 7.09 (s, 1H), 3.39 (dd, *J* = 13.4, 6.7 Hz, 1H), 3.19 – 3.05 (m, 3H), 2.79 (m, 1H), 2.68 (s, 3H).

**<sup>13</sup>C NMR (126 MHz, CDCl<sub>3</sub>):** δ 202.9, 158.6, 148.3, 144.8, 138.0, 129.7, 129.3, 129.3, 128.9, 127.0, 125.9, 125.5, 123.0, 53.6, 35.8, 30.6, 25.4.

**IR (film):** ν 3062, 3028, 2921, 2839, 2725, 1723, 1601, 1562, 1510, 1497, 1454, 1414, 1377, 1338, 1192, 1156, 1126, 1079, 1028, 960, 876, 833, 762, 744, 701 cm<sup>-1</sup>.

**HRMS (ESI-TOF):** *m/z* calculated for C<sub>20</sub>H<sub>19</sub>NO [M+H]<sup>+</sup> 290.1539, found 290.1544.

**Chiral HPLC (alcohol):** AS-H column, 5% isopropanol/hexanes, 1.0 mL/min, 98% ee. *t<sub>R</sub>* = 14.3 min (major (*R*)-enantiomer), 21.4 min (minor (*S*)-enantiomer).

**[α]<sub>D</sub><sup>21</sup> (alcohol):** +9.2 (c = 1.0, CH<sub>2</sub>Cl<sub>2</sub>).

**(*R*)-2-benzyl-3-(6-fluoro-2-methylquinolin-4-yl)propionaldehyde (37)**

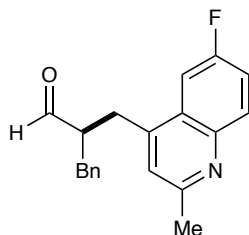

Prepared according to General Procedure A, irradiating for 24 hours. The aldehyde was purified by flash chromatography using an ethyl acetate/hexanes eluent (10 → 25%) containing 1% triethylamine to afford a white solid (97 mg, 63% yield). The corresponding alcohol was purified by flash chromatography using an ethyl acetate/hexanes eluent (50%) containing 1% triethylamine to afford a colorless semisolid.

**<sup>1</sup>H NMR (500 MHz, CDCl<sub>3</sub>):** δ 9.76 (d, *J* = 1.6 Hz, 1H), 7.99 (dd, *J* = 9.2, 5.6 Hz, 1H), 7.40 (ddd, *J* = 9.2, 8.0, 2.8 Hz, 1H), 7.35 (m, 2H), 7.31 – 7.27 (m, 1H), 7.21 (m, 2H), 7.11 (overlapping signals, 2H), 3.33 (dd, *J* = 14.3, 8.3 Hz, 1H), 3.16 (dd, *J* = 13.6, 6.5 Hz, 1H), 3.13 – 3.06 (m, 1H), 3.01 (dd, *J* = 14.3, 5.0 Hz, 1H), 2.77 (dd, *J* = 13.6, 7.7 Hz, 1H), 2.66 (s, 3H).

**<sup>13</sup>C NMR (126 MHz, CDCl<sub>3</sub>):** δ 202.6, 161.2, 159.2, 157.9, 145.4, 144.4 (d, *J* = 5.5 Hz), 137.8, 132.1 (d, *J* = 9.1 Hz), 129.1 (d, *J* = 25.9 Hz), 127.2, 126.2 (d, *J* = 9.2 Hz), 123.6, 119.3 (d, *J* = 25.3 Hz), 106.7 (d, *J* = 22.5 Hz), 53.5, 35.8, 30.4, 25.3.

**IR (film):** ν 3064, 3028, 2923, 2853, 2728, 1723, 1625, 1605, 1564, 1511, 1498, 1471, 1454, 1392, 1379, 1342, 1232, 1199, 1177, 1114, 1079, 1030, 1002, 967, 930, 869, 833, 773, 747, 701, 678 cm<sup>-1</sup>.

**HRMS (ESI-TOF):** *m/z* calculated for C<sub>20</sub>H<sub>18</sub>FNO [M+H]<sup>+</sup> 308.1445, found 308.1446.

**Chiral HPLC (alcohol):** AS-H column, 10% isopropanol/hexanes, 1.0 mL/min, 97% ee. *t<sub>R</sub>* = 6.5 min (major (*R*)-enantiomer), 9.6 min (minor (*S*)-enantiomer).

**[α]<sub>D</sub><sup>21</sup> (alcohol):** +11.7 (c = 1.0, CH<sub>2</sub>Cl<sub>2</sub>).

**(*R*)-2-benzyl-3-(6-bromo-2-methylquinolin-4-yl)propionaldehyde (38)**

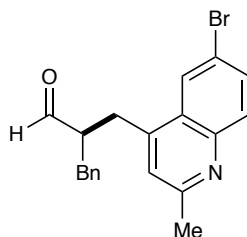

Prepared according to General Procedure A, irradiating for 24 hours. The aldehyde was purified by flash chromatography using an ethyl acetate/hexanes eluent (15 → 30%) containing 1% triethylamine to afford an off-white solid (111 mg, 60% yield). The corresponding alcohol was purified by flash chromatography using an ethyl acetate/hexanes eluent (30 → 60%) containing 1% triethylamine followed by preparative thin layer chromatography (65% ethyl acetate/hexanes + 1% triethylamine) to afford an off-white solid.

**<sup>1</sup>H NMR (500 MHz, CDCl<sub>3</sub>):** δ 9.75 (d, *J* = 1.5 Hz, 1H), 7.84 (d, *J* = 8.9 Hz, 1H), 7.68 (dd, *J* = 8.9, 2.2 Hz, 1H), 7.65 (d, *J* = 2.1 Hz, 1H), 7.36 (m, 2H), 7.29 (m, 1H), 7.21 (m, 2H), 7.09 (s, 1H), 3.29 (dd, *J* = 14.2, 8.6 Hz, 1H), 3.16 (dd, *J* = 13.5, 6.2 Hz, 1H), 3.10 (dddd, *J* = 14.8, 8.3, 6.2, 1.6 Hz, 1H), 3.02 (dd, *J* = 14.2, 4.8 Hz, 1H), 2.73 (dd, *J* = 13.5, 8.0 Hz, 1H), 2.64 (s, 3H).

**<sup>13</sup>C NMR (126 MHz, CDCl<sub>3</sub>):** δ 202.3, 159.1, 146.9, 144.0, 137.7, 132.7, 131.4, 129.1, 129.1, 127.2, 126.8, 125.4, 123.7, 119.9, 53.566 35.7, 30.1, 25.4.

**IR (film):** ν 3063, 3027, 2922, 2852, 2727, 1723, 1600, 1557, 1495, 1471, 1454, 1379, 1339, 1316, 1256, 1221, 1191, 1153, 1074, 1030, 997, 966, 877, 829, 785, 746, 701, 685, 655 cm<sup>-1</sup>.

**HRMS (ESI-TOF):** *m/z* calculated for C<sub>20</sub>H<sub>18</sub>BrNO [M+H]<sup>+</sup> 368.0645, found 368.0639.

**Chiral HPLC (alcohol):** OD-H column, 10% isopropanol/hexanes, 1.0 mL/min, 99% ee. *t<sub>R</sub>* = 14.3 min (minor (*S*)-enantiomer), 20.5 min (major (*R*)-enantiomer).

**[α]<sub>D</sub><sup>22</sup> (alcohol):** +14.2 (*c* = 1.0, CH<sub>2</sub>Cl<sub>2</sub>).



**(*R*)-2-benzyl-3-(6-mesyloxy-2-methylquinolin-4-yl)propionaldehyde (39)**

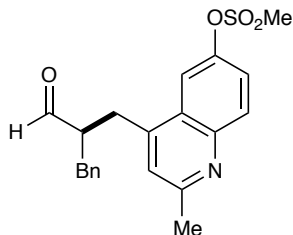

Prepared according to General Procedure A, irradiating for 24 hours. The aldehyde was purified by flash chromatography using an ethyl acetate/hexanes eluent (40 → 60%) containing 1% triethylamine to afford a pale yellow oil (134 mg, 70% yield). The corresponding alcohol was purified by flash chromatography using an ethyl acetate/hexanes eluent (40 → 65 → 80%) containing 1% triethylamine followed by preparative thin layer chromatography (80% ethyl acetate/hexanes + 1% triethylamine) to afford a white solid.

**<sup>1</sup>H NMR (500 MHz, CDCl<sub>3</sub>):** δ 9.73 (d, *J* = 1.5 Hz, 1H), 8.04 (d, *J* = 9.1 Hz, 1H), 7.55 (dd, *J* = 9.1, 2.6 Hz, 1H), 7.49 (d, *J* = 2.6 Hz, 1H), 7.35 (t, *J* = 7.5 Hz, 2H), 7.29 (t, *J* = 7.0 Hz, 1H), 7.22 (d, *J* = 6.9 Hz, 2H), 7.13 (s, 1H), 3.35 (dd, *J* = 14.2, 8.4 Hz, 1H), 3.21 – 3.10 (overlapping signals, 5H), 3.04 (dd, *J* = 14.2, 4.3 Hz, 1H), 2.76 (dd, *J* = 12.9, 7.3 Hz, 1H), 2.67 (s, 3H).

**<sup>13</sup>C NMR (126 MHz, CDCl<sub>3</sub>):** <sup>13</sup>C NMR (126 MHz, CDCl<sub>3</sub>) δ 202.5, 159.5, 146.7, 146.4, 145.2, 137.67, 131.9, 129.3, 129.0, 127.2, 126.0, 124.0, 115.7, 53.6, 37.6, 35.8, 30.4, 25.3.

**IR (film):** ν 3029, 2939, 2836, 2731, 1723, 1605, 1562, 1504, 1464, 1454, 1416, 1366, 1281, 1225, 1184, 1143, 1100, 1030, 968, 929, 909, 886, 855, 839, 798, 728, 701, 667 cm<sup>-1</sup>.

**HRMS (ESI-TOF):** *m/z* calculated for C<sub>21</sub>H<sub>21</sub>NO<sub>4</sub>S [M+H]<sup>+</sup> 384.1264, found 384.1261.

**Chiral HPLC (alcohol):** OD-H column, 20% isopropanol/hexanes, 1.0 mL/min, 98% ee. *t*<sub>R</sub> = 15.6 min (minor (*S*)-enantiomer), 18.3 min (major (*R*)-enantiomer).

**[α]<sub>D</sub><sup>20</sup> (alcohol):** +3.7 (c = 1.0, CH<sub>2</sub>Cl<sub>2</sub>).

**(*R*)-2-benzyl-3-(7-chloro-2-methylquinolin-4-yl)propionaldehyde (40)**

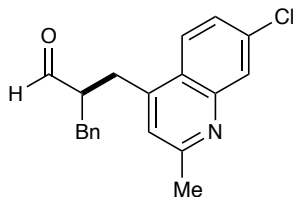

Prepared according to General Procedure A, irradiating for 24 hours. The aldehyde was purified by flash chromatography using an ethyl acetate/hexanes eluent (8 → 15%) containing 1% triethylamine to afford a pale yellow oil (122 mg, 76% yield). The corresponding alcohol was purified by flash chromatography using an ethyl acetate/hexanes eluent (25 → 50%) containing 1% triethylamine followed by preparative thin layer chromatography (60% ethyl acetate/hexanes + 1% triethylamine) to afford an off-white solid.

**<sup>1</sup>H NMR (500 MHz, CDCl<sub>3</sub>):** δ 9.74 (d, *J* = 1.5 Hz, 1H), 7.98 (d, *J* = 2.1 Hz, 1H), 7.41 (d, *J* = 8.9 Hz, 1H), 7.36 – 7.32 (m, 2H), 7.32 – 7.30 (m, 1H), 7.29 – 7.26 (m, 1H), 7.19 (m, 2H), 7.06 (s, 1H), 3.40 – 3.33 (m, 1H), 3.14 (dd, *J* = 13.7, 6.2 Hz, 1H), 3.09 – 3.01 (m, 2H), 2.78 – 2.72 (m, 1H), 2.65 (s, 3H).

**<sup>13</sup>C NMR (126 MHz, CDCl<sub>3</sub>):** δ 202.5, 160.0, 148.8, 145.0, 137.8, 135.1, 129.3, 129.0, 128.7, 127.1, 126.7, 124.4, 123.9, 123.1, 53.8, 35.7, 30.2, 25.4.

**IR (film):** ν 3064, 3028, 2927, 2857, 2728, 1724, 1602, 1561, 1498, 1454, 1435, 1407, 1377, 1338, 1319, 1257, 1185, 1154, 1116, 1074, 1043, 1002, 970, 900, 883, 839, 815, 774, 747, 700 cm<sup>-1</sup>.

**HRMS (ESI-TOF):** *m/z* calculated for C<sub>20</sub>H<sub>18</sub>ClNO [M+H]<sup>+</sup> 324.1150, found 324.1153.

**Chiral HPLC (alcohol):** AS-H column, 10% isopropanol/hexanes, 1.0 mL/min, 99% ee. *t<sub>R</sub>* = 5.9 min (major (*R*)-enantiomer), 7.2 min (minor (*S*)-enantiomer).

**[α]<sub>D</sub><sup>20</sup> (alcohol):** +26.1 (c = 0.50, MeOH).

**(R)-2-(2-oxo-2-phenylethyl)octanal (46)<sup>2</sup>**

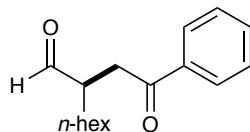

Prepared according to General Procedure B, irradiating for 16 hours. The aldehyde was purified by flash chromatography using an ethyl acetate/hexanes eluent (4%) to afford a clear, colorless oil (96 mg, 78% yield).

**<sup>1</sup>H NMR (500 MHz, CDCl<sub>3</sub>):**  $\delta$  9.82 (s, 1H), 7.97 (d,  $J = 7.7$  Hz, 2H), 7.57 (t,  $J = 7.4$  Hz, 1H), 7.47 (t,  $J = 7.6$  Hz, 2H), 3.48 (dd,  $J = 17.8, 7.8$  Hz, 1H), 3.11 (dt,  $J = 14.1, 6.5$  Hz, 1H), 3.02 (dd,  $J = 17.8, 4.8$  Hz, 1H), 1.79 (m, 1H), 1.54 (m, 1H), 1.43 – 1.22 (m, 8H), 0.88 (t,  $J = 6.7$  Hz, 3H).

**<sup>13</sup>C NMR (126 MHz, CDCl<sub>3</sub>):**  $\delta$  203.8, 198.2, 136.7, 133.4, 128.8, 128.2, 46.9, 37.8, 31.7, 29.5, 29.0, 27.2, 22.7, 14.2.

**IR (film):**  $\nu$  2955, 2927, 2857, 2719, 1724, 1683, 1598, 1581, 1464, 1449, 1405, 1391, 1359, 1279, 1247, 1219, 1181, 1075, 1002, 969, 903, 887, 850, 754, 725, 690, 655 cm<sup>-1</sup>.

**HRMS (ESI-TOF):**  $m/z$  calculated for C<sub>16</sub>H<sub>22</sub>O<sub>2</sub> [M+H]<sup>+</sup> 247.1693, found 247.1692.

**Chiral HPLC (alcohol):** OD-H column, 5% isopropanol/hexanes, 1.0 mL/min, 93% ee.  $t_R = 8.9$  min (major (*R*)-enantiomer), 10.2 min (minor (*S*)-enantiomer).

**$[\alpha]_D^{21}$  (alcohol):** +68.4 (c = 1.0, CH<sub>2</sub>Cl<sub>2</sub>), +65.2 (c = 1.0, CHCl<sub>3</sub>), lit<sup>2</sup>  $[\alpha]_D^{23}$  +66.9 (c = 1.30, CHCl<sub>3</sub>).

**(R)-2-(2-(benzo[d][1,3]dioxol-5-yl)-2-oxoethyl)octanal (47)**

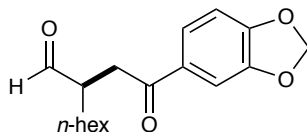

Prepared according to General Procedure B, irradiating for 48 hours. The aldehyde was purified by flash chromatography using an ethyl acetate/hexanes eluent (4%) to afford a clear, colorless oil (106 mg, 73% yield).

**<sup>1</sup>H NMR (500 MHz, CDCl<sub>3</sub>):** δ 9.80 (d, *J* = 1.1 Hz, 1H), 7.57 (dd, *J* = 8.1, 1.8 Hz, 1H), 7.42 (d, *J* = 1.8 Hz, 1H), 6.84 (d, *J* = 8.2 Hz, 1H), 6.03 (s, 2H), 3.38 (dd, *J* = 17.6, 7.9 Hz, 1H), 3.06 (m, 1H), 2.94 (dd, *J* = 17.6, 4.7 Hz, 1H), 1.76 (m, 1H), 1.51 (m, 1H), 1.41 – 1.20 (m, 8H), 0.86 (t, *J* = 6.8 Hz, 3H).

**<sup>13</sup>C NMR (126 MHz, CDCl<sub>3</sub>):** δ 203.9, 196.1, 152.0, 148.3, 131.5, 124.5, 108.0, 108.0, 102.0, 47.0, 37.6, 31.7, 29.5, 29.0, 27.2, 22.7, 14.2.

**IR (film):** ν 2952, 2926, 2857, 2719, 1724, 1675, 1604, 1505, 1488, 1443, 1361, 1250, 1140, 1107, 1096, 1037, 1004, 934, 893, 878, 810, 722 cm<sup>-1</sup>.

**HRMS (ESI-TOF):** *m/z* calculated for C<sub>17</sub>H<sub>22</sub>O<sub>4</sub> [M+H]<sup>+</sup> 291.1591, found 291.1591.

**Chiral HPLC (alcohol):** OD-H column, 5% isopropanol/hexanes, 1.0 mL/min, 92% ee. *t<sub>R</sub>* = 14.3 min (major (*R*)-enantiomer), 17.6 min (minor (*S*)-enantiomer).

**[α]<sub>D</sub><sup>21</sup>:** +54.7 (c = 1.0, CH<sub>2</sub>Cl<sub>2</sub>).

**(R)-2-(2-(4-fluorophenyl)-2-oxoethyl)octanal (48)**

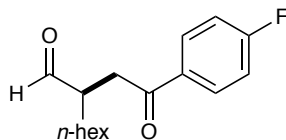

Prepared according to General Procedure B, irradiating for 16 hours. The aldehyde was purified by flash chromatography using an ethyl acetate/hexanes eluent (4%) to afford a white solid (106 mg, 80% yield).

**<sup>1</sup>H NMR (500 MHz, CDCl<sub>3</sub>):** δ 9.79 (s, 1H), 7.98 (dd, *J* = 8.6, 5.5 Hz, 2H), 7.11 (t, *J* = 8.5 Hz, 2H), 3.43 (dd, *J* = 17.8, 8.1 Hz, 1H), 3.08 (dt, *J* = 12.0, 6.0 Hz, 1H), 2.95 (dd, *J* = 17.8, 4.6 Hz, 1H), 1.77 (dq, *J* = 13.6, 6.9 Hz, 1H), 1.52 (dq, *J* = 14.5, 7.2 Hz, 1H), 1.42 – 1.19 (m, 8H), 0.86 (t, *J* = 6.8 Hz, 3H).

**<sup>13</sup>C NMR (126 MHz, CDCl<sub>3</sub>):** δ 203.6, 196.5, 165.9 (d, *J* = 255.0 Hz), 133.1 (d, *J* = 3.0 Hz), 130.8 (d, *J* = 9.3 Hz), 115.8 (d, *J* = 21.9 Hz), 46.8, 37.6, 31.7, 29.4, 28.9, 27.1, 22.6, 14.1.

**IR (film):** ν 3076, 2956, 2928, 2858, 2719, 1724, 1683, 1597, 1507, 1464, 1409, 1359, 1299, 1282, 1228, 1156, 1100, 999, 969, 834, 724 cm<sup>-1</sup>.

**HRMS (ESI-TOF):** *m/z* calculated for C<sub>16</sub>H<sub>21</sub>FO<sub>2</sub> [M+H]<sup>+</sup> 265.1598, found 265.1599.

**Chiral HPLC (alcohol):** OD-H column, 0.5% isopropanol/hexanes, 1.0 mL/min, 87% ee. *t*<sub>R</sub> = 17.5 min (minor (*S*)-enantiomer), 19.2 min (major (*R*)-enantiomer).

**[α]<sub>D</sub><sup>20</sup>:** +59.0 (c = 1.0, CH<sub>2</sub>Cl<sub>2</sub>).

## VI. Enantioselective Synthesis of PK-14067 (44) (Figure 2)

### Step 1: (*R*)-2-methyl-3-(quinolin-4-yl)propionaldehyde

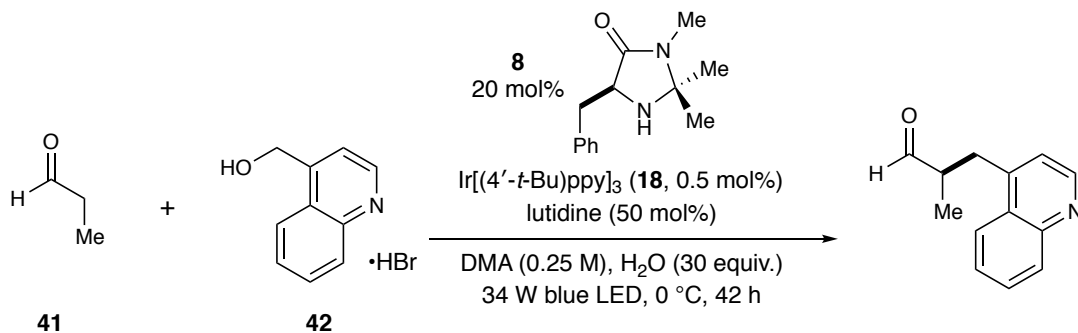

4-(Hydroxymethyl)quinoline (**42**)•HBr (480 mg, 2.00 mmol, 1.00 equiv) and propionaldehyde (**41**) (0.72 mL, 10 mmol, 5.0 equiv) were subjected to General Procedure A, with the reaction volume split evenly between two 8 mL vials, irradiating for 42 hours. <sup>1</sup>H NMR analysis of the reaction mixture indicated that no starting alcohol remained, with 84% yield of the desired aldehyde. Following workup, the crude material was used in the next step without further purification.

### Steps 2 & 3: *N,N*-diethyl-(*R*)-2-methyl-3-(quinolin-4-yl)propionamide (**43**)

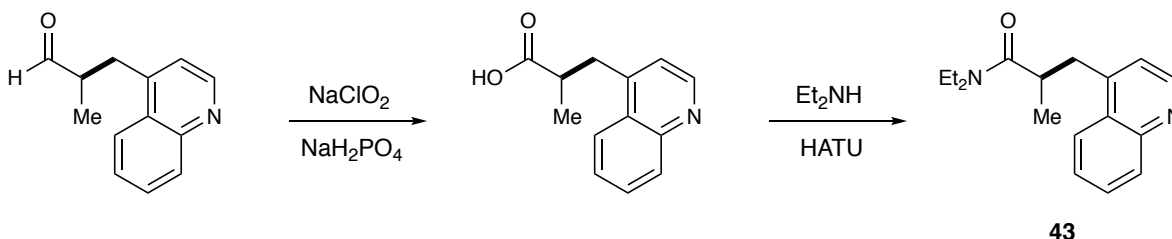

Sodium chlorite (80 wt%, 1.13 g, 10.0 mmol, 5.00 equiv vs. starting alcohol **42**) was added in one portion to a mixture of the crude aldehyde from step 1 (1.00 equiv), sodium dihydrogen phosphate monohydrate (2.76 g, 20.00 mmol, 10.0 equiv) and 2-methyl-2-butene (90 wt%, 4.70 mL, 40.0 mmol, 20.0 equiv) in 2:1 *tert*-butanol/water (20 mL) at 0 °C, and the mixture was allowed to warm to room temperature. After 2 hours, water (75 mL) was added, the mixture was extracted with 4:1

CH<sub>2</sub>Cl<sub>2</sub>/isopropanol (50, 2 × 25 mL), and the combined organic extracts were dried over Na<sub>2</sub>SO<sub>4</sub> and concentrated. The residue was used immediately without further purification.

Diethylamine (0.62 mL, 6.0 mmol, 3.0 equiv vs. starting alcohol **42**) was added to a mixture of the crude acid from step 1 (1.00 equiv) and HATU (1.14 g, 3.00 mmol, 1.50 equiv) in dimethylformamide (10 mL) at 0 °C, and the mixture was allowed to warm to room temperature. After 2 hours, saturated NaHCO<sub>3</sub> (50 mL) and saturated Na<sub>2</sub>CO<sub>3</sub> (50 mL) were added, the mixture was extracted with ethyl acetate (3 × 50 mL), and the combined organic extracts were dried over Na<sub>2</sub>SO<sub>4</sub> and concentrated. The residue was purified by flash chromatography on silica gel (1 → 3% methanol/CH<sub>2</sub>Cl<sub>2</sub>) to afford a brown oil (426 mg, 79% yield over 3 steps).

**<sup>1</sup>H NMR (500 MHz, CDCl<sub>3</sub>):** δ 8.76 (d, *J* = 4.3 Hz, 1H), 8.09 (d, *J* = 9.0 Hz, 1H), 8.04 (d, *J* = 9.0 Hz, 1H), 7.68 (ddd, *J* = 8.3, 6.8, 1.4 Hz, 1H), 7.56 (ddd, *J* = 8.3, 6.9, 1.3 Hz, 1H), 7.24 (d, *J* = 4.4 Hz, 1H), 3.43 (dd, *J* = 13.5, 8.9 Hz, 1H), 3.30 (dq, *J* = 14.1, 7.1 Hz, 1H), 3.22 – 3.12 (m, 2H), 3.07 (m, 1H), 2.87 (ddt, *J* = 19.2, 15.0, 7.5 Hz, 2H), 1.26 (d, *J* = 6.7 Hz, 3H), 0.92 (t, *J* = 7.1 Hz, 3H), 0.76 (t, *J* = 7.1 Hz, 3H).

**<sup>13</sup>C NMR (126 MHz, CDCl<sub>3</sub>):** δ 174.4, 150.2, 148.4, 146.2, 130.4, 129.2, 127.6, 126.6, 123.5, 122.3, 41.8, 40.6, 36.8, 36.7, 19.0, 14.6, 13.0.

**IR (film):** ν 3467, 2972, 2933, 2872, 1630, 1591, 1568, 1509, 1482, 1463, 1446, 1431, 1380, 1362, 1345, 1308, 1257, 1219, 1160, 1138, 1096, 1072, 1024, 945, 907, 879, 841, 814, 764, 753 cm<sup>-1</sup>.

**HRMS (ESI-TOF):** *m/z* calculated for C<sub>17</sub>H<sub>22</sub>N<sub>2</sub>O [M+H]<sup>+</sup> 271.1805, found 271.1807.

**Chiral HPLC (alcohol):** AS-H column, 5% isopropanol/hexanes, 1.0 mL/min, 95% ee. *t*<sub>R</sub> = 11.7 min (minor (*S*)-enantiomer), 14.0 min (major (*R*)-enantiomer).

**[α]<sub>D</sub><sup>21</sup>:** -109 (c = 1.0, CH<sub>2</sub>Cl<sub>2</sub>).

**Step 4: *N,N*-diethyl-(*R*)-2-methyl-3-(2-phenylquinolin-4-yl)propionamide (PK-14067, 44)<sup>3,4</sup>**

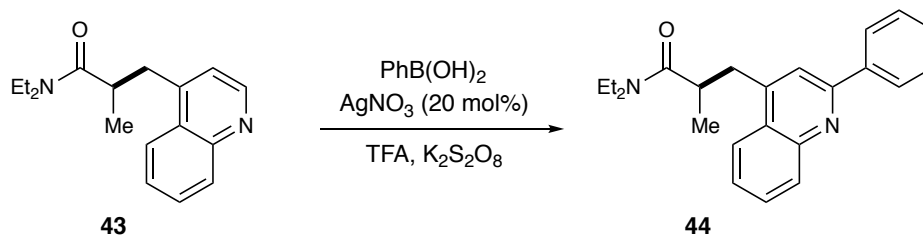

Based on the method of Baran,<sup>5</sup> trifluoroacetic acid (76  $\mu\text{L}$ , 0.99 mmol, 2.0 equiv) was added to a solution of *N,N*-diethyl-(*R*)-2-methyl-3-(2-phenylquinolin-4-yl)propionamide (**43**) (135 mg, 0.499 mmol, 1.00 equiv) in  $\text{CH}_2\text{Cl}_2$  (2.5 mL), followed by phenylboronic acid (91 mg, 0.75 mmol, 1.5 equiv), water (2.5 mL), silver(I) nitrate (17 mg, 0.10 mmol, 0.20 equiv), and potassium persulfate (405 mg, 1.50 mmol, 3.00 equiv) under air. After stirring vigorously for 12 hours, sat.  $\text{NaHCO}_3$  (15 mL) was added, the mixture was extracted with  $\text{CH}_2\text{Cl}_2$  ( $3 \times 10$  mL), and the combined organic extracts were dried over  $\text{Na}_2\text{SO}_4$  and concentrated. The residue was purified by flash chromatography on silica gel (20  $\rightarrow$  30% ethyl acetate/hexanes) to afford a pale yellow oil (90 mg, 52% yield).

**$^1\text{H}$  NMR (500 MHz,  $\text{CDCl}_3$ ):**  $\delta$  8.17 (d,  $J = 8.4$  Hz, 1H), 8.14 (d,  $J = 7.0$  Hz, 2H), 8.05 (d,  $J = 8.3$  Hz, 1H), 7.75 (s, 1H), 7.70 (t,  $J = 7.6$  Hz, 1H), 7.55 (d,  $J = 8.0$  Hz, 1H), 7.50 (app t, 2H), 7.44 (t,  $J = 7.2$  Hz, 1H), 3.51 (dd,  $J = 13.5, 9.0$  Hz, 1H), 3.28 (m, 2H), 3.14 (m, 2H), 2.88 (m, 2H), 1.31 (d,  $J = 6.7$  Hz, 3H), 0.88 (t,  $J = 7.1$  Hz, 3H), 0.76 (t,  $J = 7.1$  Hz, 3H).

**$^{13}\text{C}$  NMR (126 MHz,  $\text{CDCl}_3$ ):**  $\delta$  174.5, 157.0, 148.6, 146.7, 139.7, 130.778, 129.4, 129.4, 128.9, 127.6, 126.6, 126.3, 123.3, 120.1, 41.8, 40.7, 37.2, 36.8, 19.1, 14.6, 13.1.

**HRMS (ESI-TOF):**  $m/z$  calculated for  $\text{C}_{23}\text{H}_{26}\text{N}_2\text{O}$   $[\text{M}+\text{H}]^+$  347.2118, found 347.2116.

**Chiral HPLC (alcohol):** AD-H column, 1% isopropanol/hexanes, 1.0 mL/min, 95% ee.  $t_{\text{R}} = 15.5$  min (minor (*S*)-enantiomer), 19.6 min (major (*R*)-enantiomer).



$[\alpha]_{\text{D}}^{21}$ : -88 (c = 1.0, EtOH), lit<sup>3b</sup>  $[\alpha]_{\text{D}}^{18}$  -90 (c = 2.86, EtOH, 99% ee).

## VII. Synthesis of Aldehyde Substrates

Hydrocinnamaldehyde (**13**), octanal (**45**), propionaldehyde (**41**), and *cis*-non-6-enal were commercially available and distilled before use.

All of the remaining aldehydes were obtained by PCC oxidation of the corresponding alcohols. Pyridinium chlorochromate (6.48 g, 30.0 mmol, 1.50 equiv) was added in one portion to a solution of alcohol (20.0 mmol) in CH<sub>2</sub>Cl<sub>2</sub> (100 mL) at 0 °C. The bath was removed after 15 minutes, and after a total of 3 hours, silica gel (7.5 g) and ether (150 mL) were added. After stirring for 1 hour further, the mixture was concentrated and the solid residue was loaded directly onto a silica gel column and eluted with ethyl acetate/hexanes. The purified material was distilled before use.

These alcohols were all commercially available, except 3-(3',4'-dimethoxyphenyl)propan-1-ol, which was prepared by the method of Doyle.<sup>6</sup>

## VIII. Synthesis of Benzylic Electrophile Substrates

### 4-(hydroxymethyl)pyridine (3)•HBr

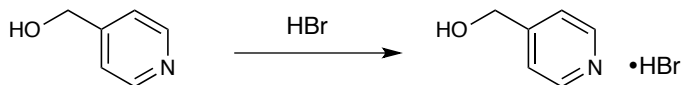

Hydrobromic acid (48% aqueous solution, 5.70 mL, 50.0 mmol, 1.00 equiv) was added dropwise to a solution of 4-(hydroxymethyl)pyridine (5.46 g, 50.0 mmol, 1.00 equiv) in warm acetone (125 mL) and a minimum of ethanol (5–10 mL). After storage at  $-20\text{ }^{\circ}\text{C}$  for 1 hour, the solid was collected by filtration and recrystallized from  $> 10:1$  ethanol/water to provide the salt as a white solid (6.86 g, 72% yield).

**$^1\text{H}$  NMR (500 MHz, DMSO- $d_6$ ):**  $\delta$  15.22 (br s, 1H), 8.90 (d,  $J = 6.8$  Hz, 2H), 8.00 (d,  $J = 6.1$  Hz, 2H), 5.91 (br s, 1H), 4.81 (s, 2H).

**$^{13}\text{C}$  NMR (126 MHz, DMSO- $d_6$ ):**  $\delta$  163.8, 141.3, 123.6, 61.3.

**IR (ATR):**  $\nu$  3299, 3210, 3120, 3103, 3079, 3043, 2981, 2929, 2894, 2810, 2776, 2011, 1990, 1923, 1906, 1849, 1796, 1712, 1639, 1605, 1515, 1508, 1456, 1435, 1370, 1332, 1268, 1247, 1210, 1185, 1095, 1052, 1007, 987, 922, 872, 789, 698  $\text{cm}^{-1}$ .

**HRMS (ESI-TOF):**  $m/z$  calculated for  $\text{C}_6\text{H}_7\text{NO}$   $[\text{M}+\text{H}]^+$  110.0600, found 110.0601.

### 4-(hydroxymethyl)-2-methylpyridine•HBr

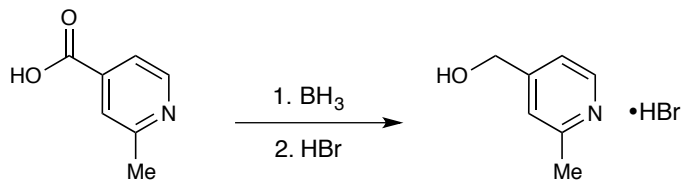

Based on the method of Birch *et al.*,<sup>7</sup> borane-THF adduct (1.0 M solution in tetrahydrofuran, 21.0

mL, 21.0 mmol, 2.10 equiv) was added dropwise to a solution of 2-methylisonicotinic acid (1.37 g, 9.99 mmol, 1.00 equiv) in tetrahydrofuran (10 mL) at 0 °C, and the mixture was warmed to ambient temperature. After 16 hours, the solution was re-cooled to 0 °C and excess borane was quenched with methanol (40 mL) and 1 M HCl (60 mL). The resulting mixture was basified with saturated NaHCO<sub>3</sub> (75 mL), saturated with solid NaCl, and extracted with CH<sub>2</sub>Cl<sub>2</sub> (4 × 25 mL) and EtOAc (6 × 25 mL). The combined organic extracts were dried over MgSO<sub>4</sub> and concentrated. The residue was purified by flash chromatography on silica gel (5% methanol/CH<sub>2</sub>Cl<sub>2</sub>) to afford a white solid (1.18 g, 96% yield).

Hydrobromic acid (48% aqueous solution, 1.09 mL, 9.58 mmol, 1.00 equiv) was added dropwise to a solution of 4-(hydroxymethyl)-2-methylpyridine (1.18 g, 9.58 mmol, 1.00 equiv) in ether (5 mL) and acetone (25 mL), immediately forming a white precipitate. The mixture was stored overnight at -20 °C, and the precipitate was collected by filtration and recrystallized from 2:1 ethanol/ether to provide the salt as a white solid (1.48 g, 76% yield).

**<sup>1</sup>H NMR (500 MHz, DMSO-*d*<sub>6</sub>):** δ 15.49 (br s, 1H), 8.75 (d, *J* = 6.2 Hz, 1H), 7.86 (s, 1H), 7.79 (d, *J* = 5.9 Hz, 1H), 5.82 (br s, 1H), 4.75 (s, 2H), 2.72 (s, 3H).

**<sup>13</sup>C NMR (126 MHz, DMSO-*d*<sub>6</sub>):** δ 163.2, 152.8, 140.3, 123.9, 121.1, 61.2, 19.2.

**IR (ATR):** ν 3314, 3244, 3079, 3057, 3028, 2988, 2897, 2801, 1942, 1874, 1851, 1741, 1638, 1622, 1519, 1490, 1421, 1407, 1389, 1363, 1302, 1271, 1230, 1216, 1156, 1118, 1064, 1009, 982, 938, 927, 824, 749, 668 cm<sup>-1</sup>.

**HRMS (ESI-TOF):** *m/z* calculated for C<sub>7</sub>H<sub>9</sub>NO [M+H]<sup>+</sup> 124.0757, found 124.0758.

#### 4-(hydroxymethyl)-2,6-dimethylpyridine•HBr

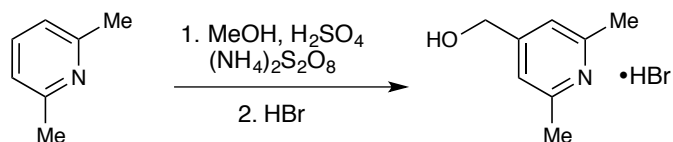

Based on the method of Minisci,<sup>8</sup> sulfuric acid (2.3 mL, 43 mmol, 1.0 equiv), methanol (60 mL), and 2,6-lutidine (5.0 mL, 43 mmol, 1.0 equiv) were successively added to a solution of ammonium persulfate (19.3 g, 85 mmol, 2.0 equiv) in water (30 mL), and the mixture was heated to 100 °C. After 24 hours, the methanol was evaporated, the aqueous solution was basified with 1 M NaOH (200 mL) and extracted with CH<sub>2</sub>Cl<sub>2</sub> (4 × 75 mL), and the combined organic extracts were dried over MgSO<sub>4</sub> and concentrated. The residue was purified by flash chromatography on silica gel (50% ethyl acetate/hexanes + 1% triethylamine) to afford a white solid (590 mg, 10% yield).

Hydrobromic acid (48% aqueous solution, 0.50 mL, 4.4 mmol, 1.0 equiv) was added dropwise to a solution of 4-(hydroxymethyl)-2,6-dimethylpyridine (590 mg, 4.3 mmol, 1.0 equiv) in acetone (10 mL), immediately forming a light yellow precipitate. Ether was diffused into the solution for 3 hours and the mixture was stored at -20 °C for 3 hours further. The precipitate was collected by filtration and recrystallized from ethanol, diffusing ether into the mixture to provide the salt as an off-white solid (722 mg, 77% yield).

**<sup>1</sup>H NMR (500 MHz, DMSO-*d*<sub>6</sub>):** δ 15.10 (br s, 1H), 7.64 (s, 2H), 5.78 (br s, 1H), 4.70 (s, 2H), 2.69 (s, 6H).

**<sup>13</sup>C NMR (126 MHz, DMSO-*d*<sub>6</sub>):** δ 162.8, 152.2, 121.1, 61.2, 19.0.

**IR (ATR):** ν 3297, 3070, 3030, 2986, 2850, 2762, 2734, 2701, 2587, 1997, 1882, 1630, 1439, 1399, 1374, 1355, 1325, 1267, 1228, 1216, 1156, 1081, 1044, 991, 950, 920, 869, 713 cm<sup>-1</sup>.

**HRMS (ESI-TOF):** *m/z* calculated for C<sub>8</sub>H<sub>11</sub>NO [M+H]<sup>+</sup> 138.0913, found 138.0914.

#### 4-(hydroxymethyl)-2-phenylpyridine•HBr

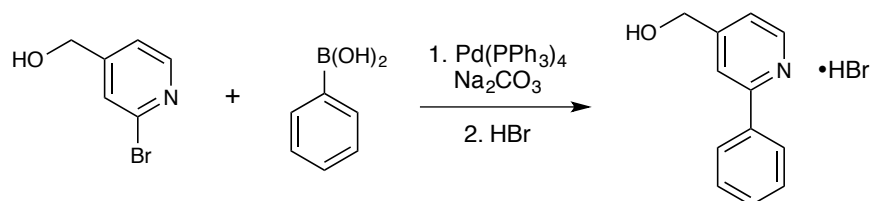

Based on the method of Sadler,<sup>9</sup> a mixture of 2-bromo-4-(hydroxymethyl)pyridine (1.88 g, 10.0 mmol, 1.00 equiv), phenylboronic acid (1.71 g, 14.0 mmol, 1.40 equiv), and sodium carbonate (3.97 g, 37.5 mmol, 3.75 equiv) in water (75 mL) and tetrahydrofuran (38 mL) was sparged with nitrogen for 15 minutes, then Pd(PPh<sub>3</sub>)<sub>4</sub> (231 mg, 0.20 mmol, 2 mol%) was added and the mixture was heated to 100 °C. After 38 hours, the mixture was extracted with CH<sub>2</sub>Cl<sub>2</sub> (3 × 75 mL), and the combined organic extracts were dried over MgSO<sub>4</sub> and concentrated. The residue was purified by flash chromatography on silica gel (40% ethyl acetate/hexanes) to afford a pale yellow oil (810 mg, 44% yield).

Hydrobromic acid (48% aqueous solution, 0.50 mL, 4.4 mmol, 1.0 equiv) was added dropwise to a solution of 4-(hydroxymethyl)-2-phenylpyridine (810 mg, 4.4 mmol, 1.0 equiv) in 3:1 acetone/ether (20 mL), immediately forming a white precipitate. The mixture was stored at -20 °C overnight, and the precipitate was collected by filtration and recrystallized from 10:1 ethanol/water provide the salt as a white solid (1.11 g, 95% yield).

**<sup>1</sup>H NMR (500 MHz, DMSO-*d*<sub>6</sub>):** δ 8.83 (d, *J* = 6.0 Hz, 1H), 8.24 (s, 1H), 8.02 (m, 2H), 7.86 (d, *J* = 6.1 Hz, 1H), 7.66 (m, 3H), 4.83 (s, 2H).

**<sup>13</sup>C NMR (126 MHz, DMSO-*d*<sub>6</sub>):** δ 163.2, 150.9, 142.4, 131.9, 131.5, 129.5, 128.2, 122.0, 121.7, 61.5.

**IR (ATR):** ν 3315, 3215, 3082, 2995, 2880, 2843, 1983, 1911, 1832, 1800, 1633, 1606, 1582, 1521, 1491, 1475, 1426, 1402, 1378, 1338, 1314, 1263, 1230, 1168, 1159, 1109, 1061, 1054, 1035, 998, 986, 920, 812, 772, 731, 715, 683 cm<sup>-1</sup>.

**HRMS (ESI-TOF):**  $m/z$  calculated for  $C_{12}H_{11}NO$   $[M+H]^+$  186.0913, found 186.0915.

***N*-4-(hydroxymethyl)pyridin-2-yl)acetamide•HBr**

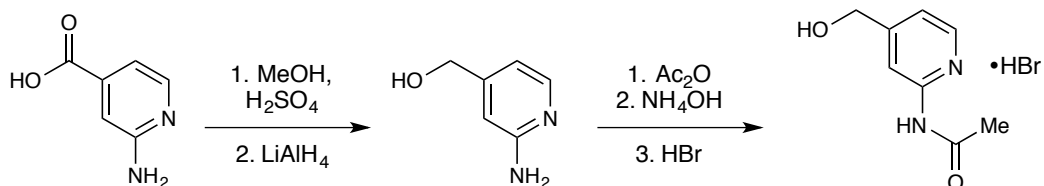

Based on the method of Lünig,<sup>10</sup> sulfuric acid (20.0 mL, 375 mmol, 10.4 equiv) was added to a suspension of 2-aminoisonicotinic acid (5.00 g, 36.2 mmol, 1.00 equiv) in methanol (200 mL) and the mixture was heated to 80 °C. After 3 days, the solution was diluted with water (200 mL), basified with NaHCO<sub>3</sub> (52 g), extracted with ethyl acetate (6 × 120 mL), and the combined organic extracts were dried over MgSO<sub>4</sub> and concentrated to provide the methyl ester a pale yellow solid (4.89 g, 89% yield).

Based on the method of Bilodeau *et al.*,<sup>11</sup> lithium aluminum hydride (1.0 M solution in tetrahydrofuran, 35.0 mL, 35.0 mmol, 1.09 equiv) was added over 15 minutes at -78 °C to a solution of methyl 2-aminoisonicotinate (4.89 g, 32.1 mmol, 1.00 equiv) in tetrahydrofuran (55 mL). After 30 minutes, the mixture was warmed to ambient temperature, and after 3 hours further, cooled to 0 °C and quenched with methanol (50 mL). The suspension was filtered through Celite, washed with methanol (50 mL), and the filtrate was concentrated. The crude material (~ 10 g) was used without further purification.

Based on the method of Honda *et al.*,<sup>12</sup> acetic anhydride (10.0 mL, 106 mmol, ≥ 3.30 equiv) was added to a suspension of the crude 2-amino-4-(hydroxymethyl)pyridine (≤ 32.1 mmol, 1.00 equiv) in pyridine (36.0 mL, 445 mmol, 13.9 equiv). After 4 hours, the mixture was diluted with ethyl acetate (300 mL), washed with saturated NaHCO<sub>3</sub> (300 mL), water (100 mL) and brine (50 mL), dried over Na<sub>2</sub>SO<sub>4</sub>, and concentrated to provide the bis(acetylated) compound as a yellow oil (4.30 g, 64% yield over 2 steps).

Based on the method of Guo *et al.*,<sup>13</sup> ammonium hydroxide (28% ammonia, 14.5 M solution in water, 10 mL, 145 mmol, 7.0 equiv) was added to a solution of the *N*-(4-(acetoxymethyl)pyridin-2-yl)acetamide (4.30 g, 20.7 mmol, 1.0 equiv) in methanol (50 mL). After 24 hours, the mixture was concentrated, and the residue was purified by flash chromatography on silica gel (ethyl acetate) to afford a white solid (1.45 g, 42% yield).

Hydrobromic acid (48% aqueous solution, 0.99 mL, 8.7 mmol, 1.0 equiv) was added dropwise to a solution of *N*-(4-(hydroxymethyl)pyridin-2-yl)acetamide (1.45 g, 8.7 mmol, 1.0 equiv) in 1:1 acetone/ethanol (20 mL), forming an off-white precipitate. The mixture was stored at  $-20\text{ }^{\circ}\text{C}$  overnight, and the precipitate was collected by filtration and recrystallized from ethanol to provide the salt as an off-white solid (1.27 g, 48% yield).

**<sup>1</sup>H NMR (500 MHz, DMSO-*d*<sub>6</sub>):**  $\delta$  12.16 (s, 1H), 8.33 (d,  $J = 6.3$  Hz, 1H), 7.62 (s, 1H), 7.44 (d,  $J = 6.4$  Hz, 1H), 4.69 (s, 2H), 2.26 (s, 3H).

**<sup>13</sup>C NMR (126 MHz, DMSO-*d*<sub>6</sub>):**  $\delta$  172.3, 163.3, 147.6, 138.3, 117.5, 111.2, 61.3, 24.2.

**IR (ATR):**  $\nu$  3308, 3084, 3023, 2909, 2810, 1687, 1647, 1607, 1559, 1555, 1507, 1437, 1413, 1372, 1352, 1322, 1309, 1270, 1227, 1208, 1162, 1107, 1070, 1035, 1020, 997, 982, 917, 823, 796, 782, 681  $\text{cm}^{-1}$ .

**HRMS (ESI-TOF):**  $m/z$  calculated for  $\text{C}_8\text{H}_{10}\text{N}_2\text{O}_2$   $[\text{M}+\text{H}]^+$  167.0815, found 167.0817.

#### 4-(hydroxymethyl)-3-methylpyridine•HBr

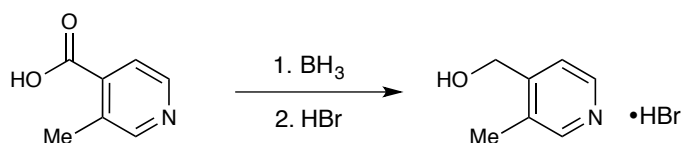

Based on the method of Birch *et al.*,<sup>7</sup> borane-THF adduct (1.0 M solution in tetrahydrofuran, 15.5



mL, 15.5 mmol, 2.13 equiv) was added dropwise to a solution of 3-methylisonicotinic acid (1.00 g, 7.26 mmol, 1.00 equiv) in tetrahydrofuran (8 mL) at 0 °C, and the mixture was warmed to ambient temperature. After 16 hours, the solution was re-cooled to 0 °C and excess borane was quenched with 1 M HCl (20 mL), and the solution was basified with 1 M NaOH (40 mL). The resulting mixture was extracted with CH<sub>2</sub>Cl<sub>2</sub> (8 × 25 mL), and the combined organic extracts were dried over MgSO<sub>4</sub> and concentrated. The residue was purified by flash chromatography on silica gel (10% methanol/CH<sub>2</sub>Cl<sub>2</sub>) to afford a white solid (900 mg, 100% yield).

Hydrobromic acid (48% aqueous solution, 0.83 mL, 7.3 mmol, 1.0 equiv) was added dropwise to a solution of 4-(hydroxymethyl)-3-methylpyridine (900 mg, 7.3 mmol, 1.0 equiv) in acetone (15 mL), immediately forming a white precipitate. The mixture was stored for 2 days at -20 °C, and the precipitate was collected by filtration and recrystallized from ethanol to provide the salt as a white solid (1.05 g, 71% yield).

**<sup>1</sup>H NMR (500 MHz, DMSO-*d*<sub>6</sub>):** δ 15.39 (sbr, 1H), 8.79 (d, *J* = 5.9 Hz, 1H), 8.73 (s, 1H), 8.03 (s, 1H), 5.84 (br s, 1H), 4.75 (s, 2H), 2.34 (s, 3H).

**<sup>13</sup>C NMR (126 MHz, DMSO-*d*<sub>6</sub>):** δ 162.1, 139.7, 139.3, 134.3, 122.3, 59.8, 14.8.

**IR (ATR):** ν 3303, 3180, 3109, 3057, 3009, 2897, 1633, 1591, 1508, 1478, 1452, 1423, 1403, 1366, 1326, 1278, 1235, 1219, 1177, 1145, 1069, 1049, 1017, 993, 950, 905, 830, 772, 699 cm<sup>-1</sup>.

**HRMS (ESI-TOF):** *m/z* calculated for C<sub>7</sub>H<sub>9</sub>NO [M+H]<sup>+</sup> 124.0757, found 124.0758.

#### 4-(hydroxymethyl)-3-methoxypyridine•HBr

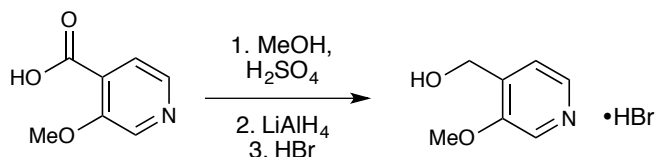

Sulfuric acid (1.4 mL, 26 mmol, 2.0 equiv) was added to a suspension of 3-methoxyisonicotinic acid (1.99 g, 13.0 mmol, 1.0 equiv) in methanol (40 mL) and the mixture was heated to 85 °C. After 12 hours, the solution was basified with saturated NaHCO<sub>3</sub> (100 mL), extracted with CH<sub>2</sub>Cl<sub>2</sub> (3 × 75 mL), and the combined organic extracts were dried over MgSO<sub>4</sub> and concentrated to provide the methyl ester as a white solid (1.55 g, 71% yield).

Based on the method of Martell,<sup>14</sup> lithium aluminum hydride (1.0 M solution in tetrahydrofuran, 15.0 mL, 15.0 mmol, 1.62 equiv) was added dropwise at 0 °C to a solution of methyl 3-methoxyisonicotinate (1.55 g, 9.27 mmol, 1.00 equiv) in tetrahydrofuran (15 mL). After 2 hours, saturated potassium sodium tartrate (15 mL) was added and the mixture was stirred at 1000 rpm. After 30 minutes, the tetrahydrofuran was evaporated, the mixture was basified with 1 M NaOH (25 mL) and extracted with CH<sub>2</sub>Cl<sub>2</sub> (7 × 50 mL), and the combined organic extracts were dried over Na<sub>2</sub>SO<sub>4</sub> and concentrated. The residue was purified by flash chromatography on silica gel (2.5 → 5% methanol/CH<sub>2</sub>Cl<sub>2</sub>) to afford a pale yellow solid (277 mg, 22% yield).

Hydrobromic acid (48% aqueous solution, 0.22 mL, 1.9 mmol, 0.95 equiv) was added dropwise to a solution of 4-(hydroxymethyl)-3-methoxypyridine (277 mg, 2.0 mmol, 1.0 equiv) in hot ethanol (2 mL), forming a white precipitate. Ether was diffused into the mixture for 1 day, the suspension was stored overnight at -20 °C, and the precipitate was collected by filtration and recrystallized from ethanol to provide the salt as a light brown solid (261 mg, 59% yield).

**<sup>1</sup>H NMR (500 MHz, DMSO-*d*<sub>6</sub>):** δ 8.60 (overlapping signals, 2H), 7.98 (d, *J* = 5.3 Hz, 1H), 5.76 (br s, 1H), 4.68 (s, 2H), 4.01 (s, 3H).

$^{13}\text{C}$  NMR (126 MHz, DMSO- $d_6$ ):  $\delta$  153.9, 150.8, 135.2, 124.1, 123.0, 57.6, 57.4.

IR (ATR):  $\nu$  3322, 3205, 3123, 3059, 2981, 2949, 2904, 2796, 2012, 1947, 1884, 1626, 1604, 1521, 1492, 1463, 1441, 1411, 1385, 1370, 1340, 1297, 1247, 1202, 1177, 1069, 1055, 1002, 979, 944, 884, 822, 778, 700  $\text{cm}^{-1}$ .

HRMS (ESI-TOF):  $m/z$  calculated for  $\text{C}_7\text{H}_9\text{NO}_2$   $[\text{M}+\text{H}]^+$  140.0706, found 140.0707.

### 3-fluoro-4-(hydroxymethyl)pyridine•HBr

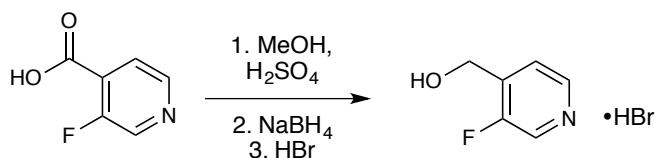

Sulfuric acid (4.5 mL, 84 mmol, 3.3 equiv) was added to a suspension of 3-fluoroisonicotinic acid (3.56 g, 25.2 mmol, 1.0 equiv) in methanol (55 mL) and the mixture was heated to 85 °C. After 40 hours, the solution was concentrated, basified with saturated NaHCO<sub>3</sub> (100 mL), and extracted with CH<sub>2</sub>Cl<sub>2</sub> (3 × 75 mL). The combined organic extracts were dried over MgSO<sub>4</sub> and concentrated to provide the methyl ester as a yellow oil (2.70 g, 69% yield).

Sodium borohydride (2.02 g, 53.4 mmol, 3.13 equiv) was added in one portion to a solution of methyl 3-fluoroisonicotinate (2.65 g, 17.1 mmol, 1.00 equiv) in methanol (60 mL). After 1 hour, the reaction was quenched with saturated NaHCO<sub>3</sub> (100 mL) and extracted with CH<sub>2</sub>Cl<sub>2</sub> (16 × 50 mL), and the combined organic extracts were dried over MgSO<sub>4</sub> and concentrated. The residue was purified by flash chromatography on silica gel (3% methanol/CH<sub>2</sub>Cl<sub>2</sub>) to afford a white solid (1.96 g, 90% yield).

Hydrobromic acid (48% aqueous solution, 1.7 mL, 15 mmol, 1.0 equiv) was added dropwise to a solution of 3-fluoro-4-(hydroxymethyl)pyridine (1.96 g, 15.4 mmol, 1.0 equiv) in warm acetone (15 mL), forming a yellow solution. Ether was diffused into the mixture for 1 hour, the suspension was stored at -20 °C for 4 hours, and the precipitate was collected by filtration and recrystallized

from ethanol to provide the salt as a white solid (1.89 g, 59% yield).

**<sup>1</sup>H NMR (500 MHz, DMSO-*d*<sub>6</sub>):** δ 9.00 (d, *J* = 3.1 Hz, 1H), 8.75 (d, *J* = 5.5 Hz, 1H), 8.71 (br s, 2H), 7.98 (t, *J* = 6.1 Hz, 1H), 4.77 (s, 2H).

**<sup>13</sup>C NMR (126 MHz, DMSO-*d*<sub>6</sub>):** δ 156.7 (d, *J* = 251.4 Hz), 148.0 (d, *J* = 12.3 Hz), 140.7 (d, *J* = 4.4 Hz), 131.7 (d, *J* = 32.7 Hz), 124.9 (d, *J* = 4.4 Hz), 56.2 (d, *J* = 3.3 Hz).

**IR (ATR):** ν 3283, 3062, 2987, 2896, 2787, 1643, 1602, 1514, 1482, 1422, 1368, 1336, 1276, 1223, 1178, 1140, 1074, 1043, 1015, 985, 953, 895, 878, 849, 830, 781, 688, 668 cm<sup>-1</sup>.

**HRMS (ESI-TOF):** *m/z* calculated for C<sub>6</sub>H<sub>6</sub>FNO [M+H]<sup>+</sup> 128.0506, found 128.0506.

### 3-chloro-4-(hydroxymethyl)pyridine•HBr

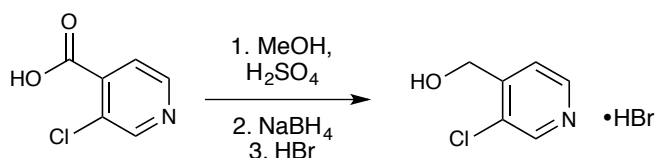

Sulfuric acid (4.5 mL, 84 mmol, 3.2 equiv) was added to a suspension of 3-chloroisonicotinic acid (4.14 g, 26.3 mmol, 1.0 equiv) in methanol (55 mL) and the mixture was heated to 85 °C. After 40 hours, the solution was concentrated, basified with saturated NaHCO<sub>3</sub> (100 mL), and extracted with CH<sub>2</sub>Cl<sub>2</sub> (3 × 50 mL). The combined organic extracts were dried over MgSO<sub>4</sub> and concentrated to provide the methyl ester as a yellow oil (3.15 g, 70% yield).

Sodium borohydride (1.91 g, 50.5 mmol, 3.03 equiv) was added in one portion to a solution of methyl 3-chloroisonicotinate (2.86 g, 16.7 mmol, 1.00 equiv) in methanol (60 mL). After 1.5 hours, the reaction was quenched with saturated NaHCO<sub>3</sub> (100 mL) and extracted with CH<sub>2</sub>Cl<sub>2</sub> (6 × 50 mL), and the combined organic extracts were dried over Na<sub>2</sub>SO<sub>4</sub> and concentrated. The residue was purified by flash chromatography on silica gel (3% methanol/CH<sub>2</sub>Cl<sub>2</sub>) to afford a white

solid (2.31 g, 96% yield).

Hydrobromic acid (48% aqueous solution, 1.8 mL, 16 mmol, 1.0 equiv) was added dropwise to a solution of 3-chloro-4-(hydroxymethyl)pyridine (2.31 g, 16.1 mmol, 1.0 equiv) in warm acetone (20 mL), forming a white precipitate. The suspension was stored at  $-20\text{ }^{\circ}\text{C}$  for 4 hours, and the precipitate was collected by filtration and recrystallized from ethanol to provide the salt as a white solid (3.09 g, 85% yield).

**$^1\text{H}$  NMR (500 MHz, DMSO- $d_6$ ):**  $\delta$  10.29 (br s, 2H), 9.03 (s, 1H), 8.84 (d,  $J = 5.7$  Hz, 1H), 7.97 (d,  $J = 5.7$  Hz, 1H), 4.70 (s, 2H).

**$^{13}\text{C}$  NMR (126 MHz, DMSO- $d_6$ ):**  $\delta$  157.6, 142.8, 142.6, 130.1, 123.8, 59.8.

**IR (ATR):**  $\nu$  3312, 3046, 2713, 1621, 1582, 1491, 1466, 1414, 1368, 1321, 1260, 1234, 1197, 1145, 1120, 1095, 1075, 1042, 1025, 962, 891, 837, 812, 723, 689, 668  $\text{cm}^{-1}$ .

**HRMS (ESI-TOF):**  $m/z$  calculated for  $\text{C}_6\text{H}_6\text{ClNO}$   $[\text{M}+\text{H}]^+$  144.0211, found 144.0209.

#### 4-(hydroxymethyl)quinoline (42)•HBr

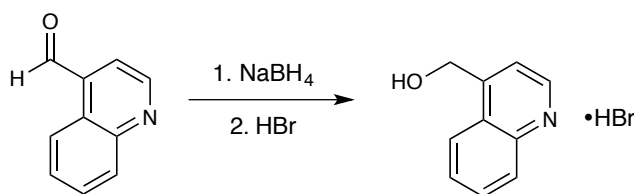

Sodium borohydride (420 mg, 11.1 mmol, 1.11 equiv) was added in small portions to a solution of quinoline-4-carboxaldehyde (1.57 g, 9.99 mmol, 1.00 equiv) in methanol (40 mL). After 12 hours, the reaction was quenched with saturated  $\text{NH}_4\text{Cl}$  (100 mL) and extracted with ethyl acetate ( $3 \times 25$  mL), and the combined organic extracts were dried over  $\text{Na}_2\text{SO}_4$  and concentrated. The residue was purified by flash chromatography on silica gel (40  $\rightarrow$  100% ethyl acetate/hexanes) to afford a white solid (1.26 g, 79% yield).

Hydrobromic acid (48% aqueous solution, 0.90 mL, 8.0 mmol, 1.0 equiv) was added dropwise to a solution of 4-(hydroxymethyl)quinoline (1.26 g, 7.91 mmol, 1.0 equiv) in acetone (25 mL), forming a white precipitate. The suspension was stored at  $-20\text{ }^{\circ}\text{C}$  for 3 days, and the precipitate was collected by filtration and recrystallized from 4:1 ethanol/water to provide the salt as light yellow needles (1.66 g, 87% yield).

**$^1\text{H}$  NMR (500 MHz, DMSO- $d_6$ ):**  $\delta$  9.36 (d,  $J$  = 5.6 Hz, 1H), 8.35 (d,  $J$  = 8.6 Hz, 1H), 8.31 (d,  $J$  = 8.6 Hz, 1H), 8.20 – 8.07 (m, 2H), 7.94 (t,  $J$  = 7.7 Hz, 1H), 5.30 (s, 2H).

**$^{13}\text{C}$  NMR (126 MHz, DMSO- $d_6$ ):**  $\delta$  160.9, 145.0, 136.7, 134.2, 129.5, 125.2, 124.7, 121.3, 118.0, 59.9.

**IR (ATR):**  $\nu$  3278, 3102, 3037, 2890, 2807, 2576, 2678, 2021, 1933, 1847, 1761, 1632, 1600, 1543, 1493, 1456, 1408, 1388, 1378, 1348, 1283, 1257, 1216, 1186, 1166, 1140, 1090, 1004, 996, 973, 931, 877, 853, 830, 807, 771  $\text{cm}^{-1}$ .

**HRMS (ESI-TOF):**  $m/z$  calculated for  $\text{C}_{10}\text{H}_9\text{NO}$   $[\text{M}+\text{H}]^+$  160.0757, found 160.0756.

#### 4-(hydroxymethyl)-2-methylquinoline•HBr

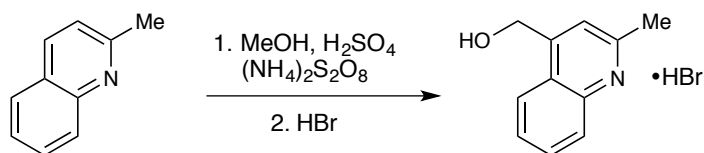

Based on the method of Minisci,<sup>8</sup> sulfuric acid (2.3 mL, 43 mmol, 1.0 equiv), methanol (60 mL), and 2-methylquinoline (5.8 mL, 43 mmol, 1.0 equiv) were successively added to a solution of ammonium persulfate (19.3 g, 85.0 mmol, 2.0 equiv) in water (30 mL), and the mixture was heated to  $100\text{ }^{\circ}\text{C}$ . After 38 hours, the methanol was evaporated, the aqueous solution was basified with 25% saturated  $\text{K}_2\text{CO}_3$  (800 mL) and extracted with  $\text{CH}_2\text{Cl}_2$  ( $4 \times 75\text{ mL}$ ), and the combined organic

extracts were dried over  $\text{MgSO}_4$  and concentrated. The residue was purified by flash chromatography on silica gel (2  $\rightarrow$  5% methanol/ $\text{CH}_2\text{Cl}_2$ ) to afford a brown solid (2.71 g, 36% yield).

Hydrobromic acid (48% aqueous solution, 1.75 mL, 15.4 mmol, 0.99 equiv) was added dropwise to a solution of 4-(hydroxymethyl)-2-methylquinoline (2.71 g, 15.6 mmol, 1.00 equiv) in hot ethanol (25 mL), immediately forming a beige precipitate, and the mixture was stored at  $-20\text{ }^\circ\text{C}$  for 5 hours further. The precipitate was collected by filtration and recrystallized twice from ethanol and a small amount of water, diffusing ether into the suspensions, to provide the salt as a brown solid (3.03 g, 76% yield).

**$^1\text{H}$  NMR (500 MHz,  $\text{DMSO}-d_6$ ):**  $\delta$  8.27 (t,  $J = 9.7$  Hz, 2H), 8.10 (t,  $J = 7.8$  Hz, 1H), 7.99 (s, 1H), 7.88 (t,  $J = 7.7$  Hz, 1H), 5.93 (br s, 1H), 5.25 (s, 2H), 2.98 (s, 3H).

**$^{13}\text{C}$  NMR (126 MHz,  $\text{DMSO}-d_6$ ):**  $\delta$  159.5, 157.5, 136.7, 133.9, 128.8, 124.5, 123.6, 120.5, 119.6, 59.7, 20.8.

**IR (ATR):**  $\nu$  3283, 2967, 2828, 2778, 2746, 2719, 2582, 1833, 1793, 1641, 1607, 1533, 1495, 1466, 1433, 1413, 1403, 1393, 1364, 1341, 1324, 1244, 1234, 1184, 1137, 1091, 1031, 1000, 980, 965, 917, 879, 864, 763  $\text{cm}^{-1}$ .

**HRMS (ESI-TOF):**  $m/z$  calculated for  $\text{C}_{11}\text{H}_{11}\text{NO}$   $[\text{M}+\text{H}]^+$  174.0913, found 174.0913.

#### 6-fluoro-4-(hydroxymethyl)-2-methylquinoline•HBr

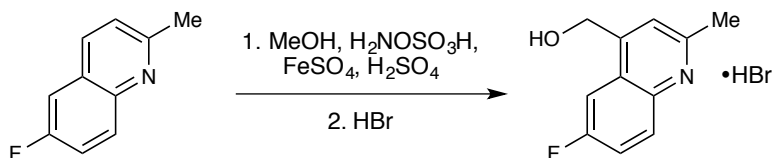

Based on the method of Minisci,<sup>15</sup> iron(II) sulfate heptahydrate (2.41 g, 8.67 mmol, 30 mol%) and hydroxylamine *O*-sulfonic acid (9.78 g, 86.5 mmol, 3.00 equiv) were added to a solution of 6-

fluoro-2-methylquinoline (4.65 g, 28.9 mmol, 1.00 equiv) and sulfuric acid (1.55 mL, 29.1 mmol, 1.01 equiv) in methanol (60 mL) and water (30 mL), stirred in a water bath to minimize temperature rise from the exothermic process. After 3 hours, the methanol was evaporated, the aqueous solution was basified with 75% saturated NaHCO<sub>3</sub> (400 mL) containing sodium citrate dihydrate (6 g) and extracted with 4:1 CH<sub>2</sub>Cl<sub>2</sub>/isopropanol (150, 5 × 75 mL), and the combined organic extracts were dried over Na<sub>2</sub>SO<sub>4</sub> and concentrated. The residue was purified by flash chromatography on silica gel (1 → 2.5% methanol/CH<sub>2</sub>Cl<sub>2</sub>) to afford an off-white solid (2.89 g, 52% yield).

Hydrobromic acid (48% aqueous solution, 1.7 mL, 15 mmol, 1.0 equiv) was added dropwise to a solution of 6-fluoro-4-(hydroxymethyl)-2-methylquinoline (4.63 g, 15.1 mmol, 1.0 equiv) in hot acetone (50 mL), forming a white precipitate, and the mixture was stored at -20 °C for 4 hours. The precipitate was collected by filtration and recrystallized from > 20:1 ethanol/water to provide the salt as a golden powder (3.56 g, 87% yield).

**<sup>1</sup>H NMR (500 MHz, DMSO-*d*<sub>6</sub>):** δ 8.36 (dd, *J* = 9.4, 5.0 Hz, 1H), 8.09 (dd, *J* = 9.7, 2.8 Hz, 1H), 8.02 (m, 1H), 7.99 (s, 1H), 5.94 (br s, 1H), 5.16 (s, 2H), 2.98 (s, 3H).

**<sup>13</sup>C NMR (126 MHz, DMSO-*d*<sub>6</sub>):** δ 160.4 (d, *J* = 249.1 Hz), 158.9 (d, *J* = 5.2 Hz), 157.1 (d, *J* = 2.1 Hz), 134.0, 124.9 (d, *J* = 10.3 Hz), 123.6, 123.4 (d, *J* = 16.1 Hz), 120.4, 109.1 (d, *J* = 23.7 Hz), 59.8, 20.6.

**IR (ATR):** ν 3269, 3067, 2721, 2603, 1950, 1888, 1834, 1643, 1615, 1526, 1496, 1465, 1420, 1392, 1369, 1321, 1243, 1203, 1170, 1136, 1127, 1087, 1033, 1011, 973, 953, 925, 883, 841, 734 cm<sup>-1</sup>.

**HRMS (ESI-TOF):** *m/z* calculated for C<sub>11</sub>H<sub>10</sub>FNO [M+H]<sup>+</sup> 192.0819, found 192.0820.



### 6-bromo-4-(hydroxymethyl)-2-methylquinoline•HBr

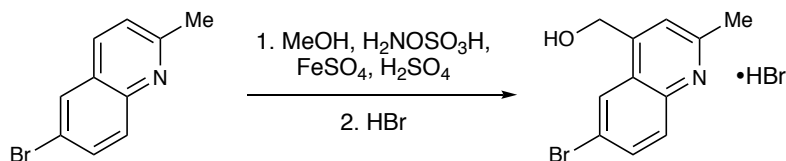

Based on the method of Minisci,<sup>15</sup> iron(II) sulfate heptahydrate (1.91 g, 6.87 mmol, 30 mol%) and hydroxylamine *O*-sulfonic acid (7.77 g, 68.7 mmol, 3.00 equiv) were added to a solution of 6-bromo-2-methylquinoline (5.08 g, 22.9 mmol, 1.00 equiv) and sulfuric acid (1.25 mL, 23.5 mmol, 1.03 equiv) in methanol (50 mL) and water (25 mL), stirred in a water bath to minimize temperature rise from the exothermic process. After 8 hours, the methanol was evaporated, the aqueous solution was basified with 75% saturated NaHCO<sub>3</sub> (400 mL) containing sodium citrate dihydrate (6 g) and extracted with 4:1 CH<sub>2</sub>Cl<sub>2</sub>/isopropanol (150, 5 × 75 mL), and the combined organic extracts were dried over Na<sub>2</sub>SO<sub>4</sub> and concentrated. The residue was purified by flash chromatography on silica gel (1 → 3% methanol/CH<sub>2</sub>Cl<sub>2</sub>) to afford an off-white solid (1.80 g, 31% yield).

Hydrobromic acid (48% aqueous solution, 0.81 mL, 7.1 mmol, 1.0 equiv) was added dropwise to a solution of 6-bromo-4-(hydroxymethyl)-2-methylquinoline (1.80 g, 7.14 mmol, 1.0 equiv) in hot acetone (50 mL), forming an off-white precipitate, and the mixture was stored at -20 °C for 30 minutes. The precipitate was collected by filtration and recrystallized from 10:1 ethanol/water to provide the salt as a light golden solid (2.00 g, 84% yield).

**<sup>1</sup>H NMR (500 MHz, DMSO-*d*<sub>6</sub>):** δ 8.50 (d, *J* = 2.0 Hz, 1H), 8.24 – 8.14 (m, 2H), 7.99 (s, 1H), 6.04 (s, 2H), 5.20 (s, 2H), 2.95 (s, 3H).

**<sup>13</sup>C NMR (126 MHz, DMSO-*d*<sub>6</sub>):** δ 158.2, 158.1, 136.4, 136.2, 126.8, 125.0, 123.1, 121.9, 120.6, 59.7, 21.1.

**IR (ATR):** ν 3312, 3052, 2965, 2901, 2698, 1966, 1851, 1741, 1643, 1599, 1521, 1479, 1453,

1429, 1397. 1381, 1365, 1320, 1226, 1141, 1100, 1072, 1031, 1002, 988, 934, 886, 868, 839, 810, 675  $\text{cm}^{-1}$ .

**HRMS (ESI-TOF):**  $m/z$  calculated for  $\text{C}_{11}\text{H}_{10}\text{BrNO}$   $[\text{M}+\text{H}]^+$  252.0019, found 252.0014.

### 6-mesyloxy-4-(hydroxymethyl)-2-methylquinoline•HBr

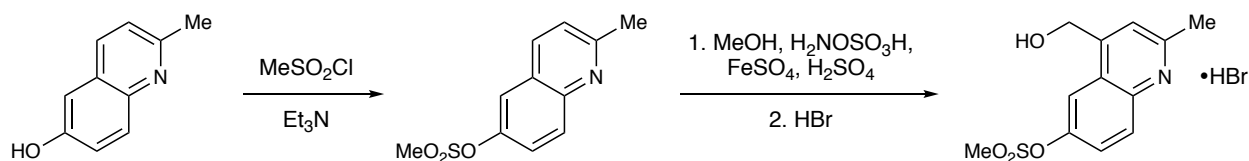

Methanesulfonyl chloride (0.93 mL, 12 mmol, 1.2 equiv) was added to a solution of 6-hydroxy-2-methylquinoline (1.59 g, 9.99 mmol, 1.00 equiv) and triethylamine (2.1 mL, 15 mmol, 1.5 equiv) in ethyl acetate (50 mL) at 0 °C. After 1 hour, water (50 mL) was added, the layers were separated, the aqueous layer was extracted with ethyl acetate (50 mL), and the combined organic layers were dried over  $\text{Na}_2\text{SO}_4$  and concentrated. The solid residue (2.25 g, 95% yield) was used directly in the next step.

Based on the method of Minisci,<sup>15</sup> iron(II) sulfate heptahydrate (791 mg, 2.85 mmol, 30 mol%) and hydroxylamine *O*-sulfonic acid (3.22 g, 28.5 mmol, 3.00 equiv) were added to a solution of crude 6-mesyloxy-2-methylquinoline (2.25 g, 9.48 mmol, 1.00 equiv) and sulfuric acid (0.51 mL, 9.6 mmol, 1.0 equiv) in methanol (23 mL) and water (11.5 mL), stirred in a water bath to minimize temperature rise from the exothermic process. After 12 hours, the methanol was evaporated, the aqueous solution was basified with 75% saturated  $\text{NaHCO}_3$  (200 mL) containing sodium citrate dihydrate (3 g) and extracted with 4:1  $\text{CH}_2\text{Cl}_2$ /isopropanol (75, 5  $\times$  40 mL), and the combined organic extracts were dried over  $\text{Na}_2\text{SO}_4$  and concentrated. The residue was purified by flash chromatography on silica gel (4  $\rightarrow$  8% methanol/ $\text{CH}_2\text{Cl}_2$ ) to afford an off-white solid (1.88 g, 74% yield).

Hydrobromic acid (48% aqueous solution, 0.80 mL, 7.0 mmol, 1.0 equiv) was added dropwise to a solution of 6-mesyloxy-4-(hydroxymethyl)-2-methylquinoline (1.88 g, 7.03 mmol, 1.0 equiv) in

hot acetone (125 mL) and a minimum of ethanol (< 5 mL), ether (50 mL) was added so that the solution remained cloudy. The resulting mixture was stored at  $-20\text{ }^{\circ}\text{C}$  overnight. The precipitate was collected by filtration and recrystallized from ethanol and a few drops of water to provide the salt as a white solid (1.49 g, 61% yield).

**$^1\text{H}$  NMR (500 MHz, DMSO- $d_6$ ):**  $\delta$  8.34 (d,  $J = 9.2$  Hz, 1H), 8.24 (d,  $J = 2.5$  Hz, 1H), 8.05 (dd,  $J = 9.2, 2.5$  Hz, 1H), 8.02 (s, 1H), 5.27 (br s overlapping with the following signal, 2H), 5.22 (d,  $J = 1.3$  Hz, 2H), 3.56 (s, 3H), 2.97 (s, 3H).

**$^{13}\text{C}$  NMR (126 MHz, DMSO- $d_6$ ):**  $\delta$  158.6, 158.4, 147.7, 136.2, 128.7, 124.5, 123.7, 120.4, 117.2, 59.8, 21.2.

**IR (ATR):**  $\nu$  3358, 3028, 3000, 2704, 1837, 1798, 1649, 1613, 1529, 1500, 1469, 1446, 1427, 1399, 1371, 1342, 1285, 1238, 1198, 1178, 1157, 1137, 1088, 1028, 982, 930, 898, 877, 861, 835, 800, 762, 705, 665  $\text{cm}^{-1}$ .

**HRMS (ESI-TOF):**  $m/z$  calculated for  $\text{C}_{12}\text{H}_{13}\text{NO}_4\text{S}$   $[\text{M}+\text{H}]^+$  268.0638, found 268.0637.

### 7-chloro-4-(hydroxymethyl)-2-methylquinoline•HBr

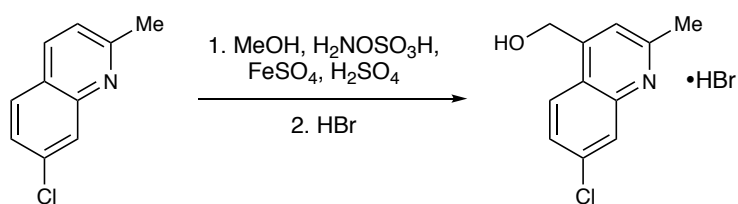

Based on the method of Minisci,<sup>15</sup> iron(II) sulfate heptahydrate (2.09 g, 7.52 mmol, 30 mol%) and hydroxylamine *O*-sulfonic acid (8.49 g, 75.1 mmol, 3.00 equiv) were added to a solution of 7-chloro-2-methylquinoline (4.44 g, 25.0 mmol, 1.00 equiv) and sulfuric acid (1.35 mL, 25.3 mmol, 1.01 equiv) in methanol (50 mL) and water (25 mL), stirred in a water bath to minimize temperature rise from the exothermic process. After 3 hours, the methanol was evaporated, the aqueous solution was basified with 75% saturated NaHCO<sub>3</sub> (400 mL) containing sodium citrate

dihydrate (6 g) and extracted with 4:1 CH<sub>2</sub>Cl<sub>2</sub>/isopropanol (150, 5 × 75 mL), and the combined organic extracts were dried over Na<sub>2</sub>SO<sub>4</sub> and concentrated. The residue was purified by flash chromatography on silica gel (0.5 → 3% methanol/CH<sub>2</sub>Cl<sub>2</sub>) to afford an off-white solid (4.02 g, 78% yield).

Hydrobromic acid (48% aqueous solution, 2.2 mL, 19 mmol, 1.0 equiv) was added dropwise to a solution of 7-chloro-4-(hydroxymethyl)-2-methylquinoline (1.80 g, 19.4 mmol, 1.0 equiv) in hot ethanol (75 mL), forming a yellow precipitate, and the mixture was stored at -20 °C for 30 minutes. The precipitate was collected by filtration and recrystallized from > 15:1 ethanol/water to provide the salt a cream solid (2.00 g, 84% yield).

**<sup>1</sup>H NMR (500 MHz, DMSO-*d*<sub>6</sub>):** δ 14.89 (br s, 1H), 8.30 (d, *J* = 9.0 Hz, 1H), 8.28 (d, *J* = 2.0 Hz, 1H), 7.97 (s, 1H), 7.90 (dd, *J* = 9.0, 2.1 Hz, 1H), 6.48 (br s, 1H), 5.21 (s, 2H), 2.97 (s, 3H).

**<sup>13</sup>C NMR (126 MHz, DMSO-*d*<sub>6</sub>):** δ 159.0, 158.8, 137.9, 137.8, 129.1, 126.8, 122.40, 120.0, 119.8, 59.7, 21.0.

**IR (ATR):** ν 3265, 3064, 3032, 2965, 2900, 2851, 2815, 2748, 2696, 2638, 1953, 1847, 1796, 1643, 1603, 1528, 1486, 1434, 1407, 1370, 1334, 1321, 1255, 1213, 1191, 1164, 1095, 1082, 1034, 1001, 989, 969, 929, 913, 893, 857, 819, 781, 760, 688, 662 cm<sup>-1</sup>.

**HRMS (ESI-TOF):** *m/z* calculated for C<sub>11</sub>H<sub>10</sub>ClNO [M+H]<sup>+</sup> 208.0524, found 208.0526.

#### 4-(acetoxymethyl)pyridine•HBr

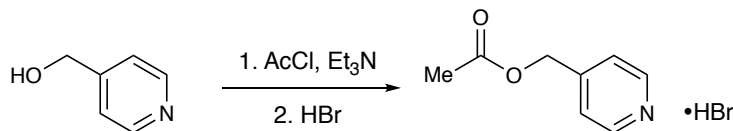

Acetyl chloride (0.78 mL, 11 mmol, 1.1 equiv) was added dropwise to a solution of 4-(hydroxymethyl)pyridine (1.09 g, 9.99 mmol, 1.00 equiv) and triethylamine (1.70 mL, 12.2 mmol,

1.22 equiv) in CH<sub>2</sub>Cl<sub>2</sub> (50 mL) at 0 °C. The mixture was then allowed to warm slowly to room temperature. After 20 hours, sat. NaHCO<sub>3</sub> (75 mL) was added, the layers were separated, the aqueous layer was extracted with CH<sub>2</sub>Cl<sub>2</sub> (2 × 30 mL), and the combined organic extracts were dried over Na<sub>2</sub>SO<sub>4</sub> and concentrated. The residue was purified by flash chromatography on silica gel (40% ethyl acetate/hexanes + 1% triethylamine) to afford a yellow oil (577 mg, 38% yield).

Hydrobromic acid (48% aqueous solution, 0.43 mL, 3.8 mmol, 1.0 equiv) was added dropwise to a solution of 4-(acetoxymethyl)pyridine (577 mg, 3.81 mmol, 1.0 equiv) in 1:1 ether/acetone (20 mL), forming a white precipitate, and the mixture was stored at -20 °C overnight. The precipitate was collected by filtration and recrystallized from 1:1 ether/acetone to provide the salt as a beige solid (580 mg, 66% yield).

**<sup>1</sup>H NMR (500 MHz, DMSO-*d*<sub>6</sub>):** δ 14.81 (br s, 1H), 9.00 (d, *J* = 6.9 Hz, 2H), 8.07 (d, *J* = 7.0 Hz, 2H), 5.41 (s, 2H), 2.16 (s, 3H).

**<sup>13</sup>C NMR (126 MHz, DMSO-*d*<sub>6</sub>):** δ 170.1, 156.9, 141.8, 124.3, 63.3, 20.7.

**IR (ATR):** ν 3055, 2574, 2073, 1976, 1888, 1736, 1635, 1596, 1512, 1433, 1388, 1369, 1332, 1308, 1238, 1208, 1192, 1046, 1003, 947, 926, 825, 798, 707, 656 cm<sup>-1</sup>.

**HRMS (ESI-TOF):** *m/z* calculated for C<sub>8</sub>H<sub>9</sub>NO<sub>2</sub> [M+H]<sup>+</sup> 152.0706, found 152.0703.

#### ***N*-(pyridin-4-ylmethyl)-*N,N,N*-trimethylammonium bromide•HBr**

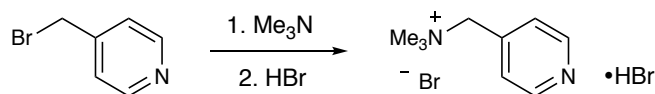

4-Bromomethylpyridine hydrobromide (1.02 g, 4.03 mmol, 1.00 equiv) was added to sat. NaHCO<sub>3</sub> (40 mL), and the resulting free base was extracted with ether (2 × 25 mL). The combined organic extracts were quickly dried over Na<sub>2</sub>SO<sub>4</sub> and concentrated to a volume of ~ 20 mL. Trimethylamine (1 M solution in tetrahydrofuran, 20 mL, 20 mmol, 5.0 equiv) was added to the

ethereal solution, forming a white precipitate. After 18 hours, the mixture was filtered, and the resulting off-white solid was washed with acetone to provide trimethylammonium salt (852 mg, 91% yield).

Hydrobromic acid (48% aqueous solution, 0.42 mL, 3.7 mmol, 1.0 equiv) was added dropwise to a solution of *N*-(pyridin-4-ylmethyl)-*N,N,N*-trimethylammonium bromide (582 mg, 3.67 mmol, 1.00 equiv) in ethanol (30 mL), forming a white precipitate within ~ 5 minutes, and the mixture was stored at -20 °C for 4 hours. The precipitate was collected by filtration and recrystallized from ethanol and a few drops of water to provide the dicationic salt as white prisms (858 mg, 75% yield).

**<sup>1</sup>H NMR (500 MHz, DMSO-*d*<sub>6</sub>):** δ 11.89 (br s, 1H), 9.09 (d, *J* = 6.5 Hz, 2H), 8.22 (d, *J* = 6.6 Hz, 2H), 5.00 (s, 2H), 3.19 (s, 9H).

**<sup>13</sup>C NMR (126 MHz, DMSO-*d*<sub>6</sub>):** δ 145.1, 143.9, 130.5, 64.6, 52.3.

**IR (ATR):** ν 3002, 2957, 2599, 2045, 1967, 1834, 1639, 1603, 1515, 1493, 1483, 1474, 1420, 1404, 1363, 1337, 1309, 1247, 1228, 1199, 1189, 1138, 1092, 1066, 1026, 1006, 972, 931, 910, 866, 850, 807, 758, 714 cm<sup>-1</sup>.

**HRMS (ESI-TOF):** *m/z* calculated for C<sub>9</sub>H<sub>15</sub>N<sub>2</sub><sup>+</sup> [M]<sup>+</sup> 151.1230, found 151.1230.

#### 4-(methoxymethyl)pyridine•HBr

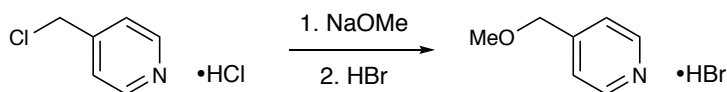

Based on the method of Walsh,<sup>16</sup> methanol (8 mL) was added to freshly cut sodium (1.00 g, 43.5 mmol, 2.50 equiv) at 0 °C. The mixture was allowed to warm slowly to room temperature and stirred for 11 hours, at which point the solid had completely dissolved. 4-(Chloromethyl)pyridine hydrochloride (2.85 g, 17.4 mmol, 1.00 equiv) was added in one portion and the suspension was

heater to 90 °C. After 12 hours, sat. NaHCO<sub>3</sub> (75 mL) was added, the mixture was extracted with CH<sub>2</sub>Cl<sub>2</sub> (3 × 40 mL), and the combined organic extracts were dried over Na<sub>2</sub>SO<sub>4</sub> and concentrated. The residue was purified by flash chromatography on silica gel (70% ether/hexanes + 1% triethylamine) to afford a pale yellow oil (2.13 g, 100% yield).

Hydrobromic acid (48% aqueous solution, 1.90 mL, 16.7 mmol, 0.97 equiv) was added dropwise to a solution of 4-(methoxymethyl)pyridine (2.13 g, 17.3 mmol, 1.00 equiv) in 1:1 ether/acetone (50 mL), forming a white precipitate, and the mixture was stored at -20 °C for 6 hours. The precipitate was collected by filtration and recrystallized from ethanol to provide the salt as a white solid (2.42 g, 68% yield).

**<sup>1</sup>H NMR (500 MHz, DMSO-*d*<sub>6</sub>):** δ 14.57 (s, 1H), 8.95 (d, *J* = 6.8 Hz, 2H), 7.99 (d, *J* = 6.9 Hz, 2H), 4.76 (s, 2H), 3.41 (s, 3H).

**<sup>13</sup>C NMR (126 MHz, DMSO-*d*<sub>6</sub>):** δ 159.4, 141.6, 124.1, 71.3, 58.5.

**IR (ATR):** ν 3075, 2742, 2035, 1938, 1854, 1719, 1639, 1603, 1511, 1469, 1456, 1443, 1384, 1364, 1344, 1322, 1303, 1248, 1215, 1189, 1153, 1107, 1086, 1054, 1020, 1005, 988, 973, 933, 832, 785, 704 cm<sup>-1</sup>.

**HRMS (ESI-TOF):** *m/z* calculated for C<sub>7</sub>H<sub>9</sub>NO [M+H]<sup>+</sup> 124.0757, found 124.0759.

#### 4-(*tert*-butyldiphenylsiloxymethyl)pyridine•HBr

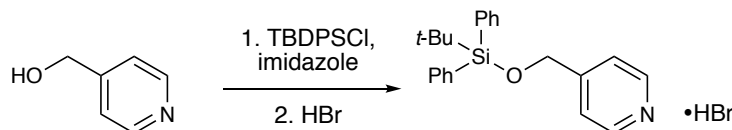

Based on a published procedure,<sup>17</sup> *tert*-butylchlorodiphenylsilane (2.60 mL, 9.99 mmol, 1.00 equiv) was added dropwise to a mixture of 4-(hydroxymethyl)pyridine (1.09 g, 9.99 mmol, 1.00 equiv) and imidazole (1.02 g, 15.0 mmol, 1.50 equiv) in CH<sub>2</sub>Cl<sub>2</sub> (50 mL) at 0 °C. After 2 hours,

water (75 mL) was added, the layers were separated, the aqueous layer was extracted with CH<sub>2</sub>Cl<sub>2</sub> (2 × 40 mL), and the combined organic extracts were dried over Na<sub>2</sub>SO<sub>4</sub> and concentrated. The residue was purified by flash chromatography on silica gel (40% ethyl acetate/hexanes) to afford a white solid (2.28 g, 66% yield).

Hydrobromic acid (48% aqueous solution, 0.75 mL, 6.6 mmol, 1.0 equiv) was added dropwise to a solution of 4-(*tert*-butyldiphenylsiloxymethyl)pyridine (2.28 g, 6.56 mmol, 1.00 equiv) in 3:1 ether/acetone (40 mL), forming a white precipitate, and the mixture was stored at –20 °C overnight. The precipitate was collected by filtration and recrystallized from 1:1 ether/acetone to provide the salt as a colorless solid (1.16 g, 41% yield).

**<sup>1</sup>H NMR (500 MHz, DMSO-*d*<sub>6</sub>):** δ 14.63 (br s, 1H), 8.95 (d, *J* = 6.7 Hz, 2H), 8.05 (d, *J* = 6.2 Hz, 2H), 7.64 (m, 4H), 7.48 (m, 2H), 7.44 (m, 4H), 5.08 (s, 2H), 1.07 (s, 9H).

**<sup>13</sup>C NMR (126 MHz, DMSO-*d*<sub>6</sub>):** δ 160.879 141.8, 135.0, 132.0, 130.3, 128.2, 123.2, 63.7, 26.6, 18.9.

**IR (ATR):** ν 3053, 2930, 2890, 2856, 2471, 2073, 1975, 1739, 1636, 1605, 1589, 1520, 1471, 1426, 1388, 1367, 1326, 1306, 1253, 1235, 1214, 1189, 1157, 1108, 1083, 1006, 997, 938, 850, 838, 823, 806, 778, 742, 701, 691 cm<sup>-1</sup>.

**HRMS (ESI-TOF):** *m/z* calculated for C<sub>22</sub>H<sub>25</sub>NOSi [M+H]<sup>+</sup> 348.1778, found 348.1776.



## IX. Synthesis of $\alpha$ -Acetoxyacetophenone Electrophile Substrates

$\alpha$ -Acetoxyacetophenone was prepared according to the method of Mioskowski,<sup>18</sup> and the resulting white solid was recrystallized from ether/hexanes.  $\alpha$ -Acetoxy-4-fluoroacetophenone<sup>19</sup> was prepared according to the method of Hou,<sup>20</sup> and the white solid obtained was recrystallized from ethyl acetate/hexanes.  $\alpha$ -Acetoxy-3,4-(methylenedioxy)acetophenone<sup>21</sup> was prepared over 2 steps according to the method of Zhang,<sup>22</sup> using the crude intermediate material without purification, and the white solid was recrystallized from ethyl acetate/hexanes.

## X. Synthesis of Catalysts

### Organocatalyst 8

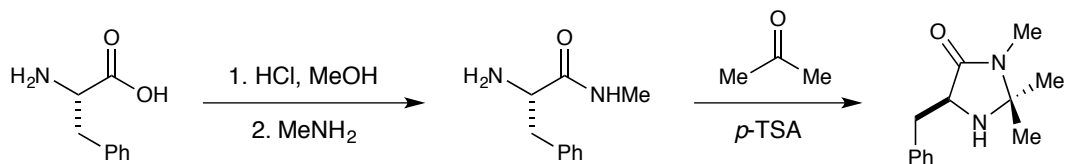

A modification to our original procedure<sup>23</sup> was made to avoid recrystallization of the catalyst as the HCl salt, which can promote hydrolysis due to adventitious water in isopropanol.

Acetyl chloride (31 mL, 440 mmol, 1.7 equiv) was added to methanol (325 mL) at 0 °C. After 10 minutes, *L*-phenylalanine (41.2 g, 249 mmol, 1.0 equiv) was added and the mixture was heated to 75 °C. After 3 hours, the solution was concentrated, and the residue basified with saturated NaHCO<sub>3</sub> (500 mL) and extracted with CH<sub>2</sub>Cl<sub>2</sub> (200, 3 × 100 mL). The combined organic extracts were dried over Na<sub>2</sub>SO<sub>4</sub> and concentrated to afford a yellow oil (39.5 g, 88% yield).

The crude methyl ester (39.5 g, 220 mmol, 1.0 equiv) was treated with methylamine (33% solution in ethanol, 55 mL, 440 mmol, 2.0 equiv) at 0 °C and allowed to warm to room temperature. After 14 hours, the solution was concentrated, and the residue dissolved in saturated NaHCO<sub>3</sub> (150 mL) and extracted with CH<sub>2</sub>Cl<sub>2</sub> (200, 3 × 100 mL). The combined organic extracts were dried over Na<sub>2</sub>SO<sub>4</sub> and concentrated. The resulting off-white solid was recrystallized from 2:1 ethyl acetate/hexanes (400 mL) to afford the pure amide as a fluffy, off-white solid (23.7 g, 60% yield). This purification simplifies the isolation of the catalyst in the following step.

A mixture of the amide (23.7 g, 133 mmol, 1.0 equiv), acetone (50 mL, 680 mmol, 5.1 equiv) and *para*-toluenesulfonic acid monohydrate (260 mg, 1.37 mmol, 1 mol%) in methanol (400 mL) was heated to 85 °C. After 36 hours, the solution was concentrated, and the residue was dissolved in 50% saturated K<sub>2</sub>CO<sub>3</sub> (200 mL) and extracted with CH<sub>2</sub>Cl<sub>2</sub> (200, 2 × 75 mL). The combined organic extracts were dried over K<sub>2</sub>CO<sub>3</sub> and concentrated to afford an orange oil. This material was purified by flash chromatography on silica gel (700 mL SiO<sub>2</sub>), eluting with 75% ethyl

acetate/hexanes (discarding 1 L and collecting the next 4 L), providing a clear, nearly colorless oil. This imidazolidinone free base (20.6 g, 94 mmol, 1.0 equiv) was dissolved in ether (500 mL) and treated with trifluoroacetic acid (7.2 mL, 94 mmol, 1.0 equiv), forming a white precipitate. After standing at  $-20\text{ }^{\circ}\text{C}$  for 6 hours, the solid was collected by filtration and air-dried overnight to afford the imidazolidinone as the trifluoroacetate salt (32.4 g, 73% yield from the amino amide).

This salt was stored under nitrogen at  $-20\text{ }^{\circ}\text{C}$  and periodically liberated in batches (1 – 2 g) to afford the free base which was used in these studies. The trifluoroacetate salt was dissolved in 50% saturated  $\text{K}_2\text{CO}_3$  (50 mL/g) and extracted with  $\text{CH}_2\text{Cl}_2$  ( $3 \times 50\text{ mL/g}$ ). The combined organic extracts were dried over  $\text{K}_2\text{CO}_3$  and concentrated to afford a low-melting white solid in quantitative yields. The free base was stored under nitrogen at  $-20\text{ }^{\circ}\text{C}$ .

**$^1\text{H}$  NMR (500 MHz,  $\text{CDCl}_3$ ):**  $\delta$  7.22 (m, 2H), 7.15 (m, 3H), 3.71 (t,  $J = 5.6\text{ Hz}$ , 1H), 3.07 (dd,  $J = 14.2, 4.5\text{ Hz}$ , 1H), 2.93 (dd,  $J = 14.2, 6.9\text{ Hz}$ , 1H), 2.68 (s, 3H), 1.59 (s, 1H), 1.18 (s, 3H), 1.08 (s, 3H).

**$^{13}\text{C}$  NMR (126 MHz,  $\text{CDCl}_3$ ):**  $\delta$  173.4, 137.2, 129.5, 128.6, 126.8, 75.6, 59.3, 37.3, 27.3, 25.4, 25.3.

**IR (ATR):**  $\nu$  3062, 3028, 2974, 2927, 1681, 1496, 1476, 1453, 1425, 1397, 1367, 1320, 1263, 1204, 1182, 1147, 1090, 1072, 1030, 922, 800, 744,  $700\text{ cm}^{-1}$ .

**HRMS (ESI-TOF):**  $m/z$  calculated for  $\text{C}_{13}\text{H}_{18}\text{N}_2\text{O}$   $[\text{M}+\text{H}]^+$  219.1492, found 219.1491.

**$[\alpha]_{\text{D}}^{20}$ :**  $-81.3$  ( $c = 1.0, \text{CH}_2\text{Cl}_2$ ).

The 3-step sequence was also performed starting from *D*-phenylalanine to provide the amino amide (24.1 g, 54% yield over 2 steps) and ultimately the trifluoroacetate salt of the imidazolidinone (41.5 g, 92% yield).

Racemic quantities of the imidazolidinone free base were obtained by liberating 1:1 mixtures of

(*R*)- and (*S*)-enantiomers of the trifluoroacetate salt with  $K_2CO_3$  as described for the (*S*)-organocatalyst. Attempts to prepare the racemic catalyst starting from *DL*-phenylalanine were complicated by the lower crystallinity of the intermediate amino amide, which impeded its recrystallization.

## Photocatalyst Ligand Synthesis

### 4-methoxy-2-(3'-methoxy-4'-methylphenyl)pyridine

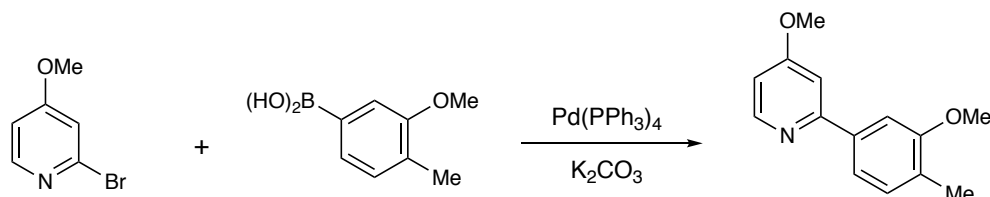

A mixture of 3-methoxy-4-*tert*-butylbenzeneboronic acid (4.54 g, 27.4 mmol, 1.18 equiv), 2-bromo-4-methoxypyridine (4.35 g, 23.1 mmol, 1.00 equiv), K<sub>2</sub>CO<sub>3</sub> (12.8 g, 92.6 mmol, 4.00 equiv), and Pd(PPh<sub>3</sub>)<sub>4</sub> (0.53 g, 0.46 mmol, 2.0 mol%) in ethanol (25 mL), water (50 mL), and toluene (100 mL) was sparged with nitrogen for 10 minutes, then heated to 70 °C. After 16 hours, the layers were separated, the upper, organic layer was washed with brine (25 mL), the original lower, aqueous layer was extracted with ether (2 × 25 mL), both ethereal extracts were also each washed with brine (25 mL), and the organic solutions were combined, dried over MgSO<sub>4</sub>, and concentrated. The residue was purified by flash chromatography on silica gel (400 mL SiO<sub>2</sub>, 10 → 15 → 25% ethyl acetate/hexanes) and recrystallized from hexanes (25 mL), to afford a white solid (2.61 g, 49% yield).

**<sup>1</sup>H NMR (500 MHz, CDCl<sub>3</sub>):** δ 8.51 (d, *J* = 5.7 Hz, 1H), 7.55 (s, 1H), 7.39 (dd, *J* = 7.6, 1.7 Hz, 1H), 7.21 (m, 2H), 6.76 (dd, *J* = 5.7, 2.4 Hz, 1H), 3.94 (s, 3H), 3.90 (s, 3H), 2.27 (s, 3H).

**<sup>13</sup>C NMR (126 MHz, CDCl<sub>3</sub>):** δ 166.5, 159.4, 158.2, 150.9, 138.5, 130.8, 127.9, 118.8, 108.7, 108.0, 106.8, 55.6, 55.3, 16.3.

**IR (ATR):** ν 3088, 3018, 2973, 2947, 2918, 2834, 1591, 1565, 1507, 1477, 1441, 1421, 1390, 1375, 1328, 1312, 1298, 1265, 1236, 1209, 1185, 1163, 1140, 1060, 1041, 1032, 997, 990, 917, 881, 860, 821, 803, 769, 742, 714, 666 cm<sup>-1</sup>.

**HRMS (ESI-TOF):** *m/z* calculated for C<sub>14</sub>H<sub>15</sub>NO<sub>2</sub> [M+H]<sup>+</sup> 230.1176, found 230.1176.

All other substituted phenylpyridine ligands used in this study were prepared analogously, and have been previously described. Following chromatography, 5-*tert*-butyl-2-phenylpyridine,<sup>24</sup> 4-*tert*-butyl-2-phenylpyridine,<sup>5</sup> 2-(3'-*tert*-butylphenyl)pyridine,<sup>25</sup> 2-(4'-*tert*-butylphenyl)pyridine,<sup>26</sup> 2-(3'-methoxyphenyl)pyridine,<sup>27</sup> and 2-(4'-methoxyphenyl)pyridine<sup>26</sup> were liquid compounds that were distilled under reduced pressure (~ 100 mTorr), while 4-methoxy-2-phenylpyridine<sup>28</sup> was a low-melting solid which was used without further purification.

### **Iridium(III) acetylacetonate**

Prepared according to the method of Stoessel *et al.*,<sup>29</sup> using acetylacetonate (16 equiv) and NaHCO<sub>3</sub> (10 equiv) as described in Example 7 of the patent, to provide 30–40% yields of the desired complex on 10–30 mmol scales.

## Photocatalyst Synthesis: Method A<sup>30</sup>

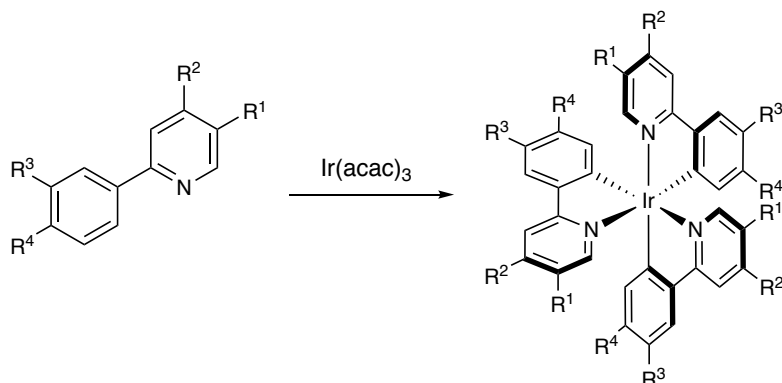

A mixture of iridium(III) acetylacetonate (1.0 equiv) and phenylpyridine ligand (6.0 equiv) in glycerol (0.02 M iridium) was sparged with nitrogen for 10 minutes and heated between 210 °C and 240 °C for 12 to 18 hours. After cooling to room temperature, the mixture was diluted with 1 M HCl (3 volumes with respect to glycerol), filtered, and the filtrate was discarded. The solid was filtered in a minimum of warm CH<sub>2</sub>Cl<sub>2</sub> and the filtrate was purified by flash chromatography on silica gel (CH<sub>2</sub>Cl<sub>2</sub>/hexanes eluent). The resulting yellow solids were dissolved in a minimum of hot CH<sub>2</sub>Cl<sub>2</sub>, methanol (1-2 volumes) was added, causing a solid to precipitate, and the solvent was boiled down to a minimum workable volume such that no CH<sub>2</sub>Cl<sub>2</sub> remained. After standing for several hours at -20 °C, the solid was collected and washed with methanol.

**Tris(5-*tert*-butyl-2-phenylpyridinato)iridium(III) (Figure 3, R<sup>1</sup> = *t*-Bu)**

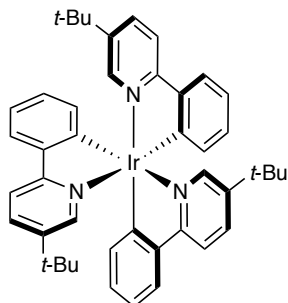

Prepared from iridium(III) acetylacetonate (2.7 mmol), heating at 210 °C for 18 hours. Chromatography was performed using a 30 → 50% CH<sub>2</sub>Cl<sub>2</sub>/hexanes eluent, but instead of subsequent precipitation with methanol, further chromatography was performed using an 0 → 30% CH<sub>2</sub>Cl<sub>2</sub>/hexanes eluent. The title compound was obtained as a yellow solid (220 mg, 55% yield).

**<sup>1</sup>H NMR (500 MHz, CDCl<sub>3</sub>):** δ 7.78 (d, *J* = 8.6 Hz, 3H), 7.61 (m, 6H), 7.44 (d, *J* = 2.3 Hz, 3H), 7.00 (m, 3H), 6.90 (m, 6H), 1.09 (s, 27H).

**<sup>13</sup>C NMR (126 MHz, CDCl<sub>3</sub>):** δ 164.5, 160.7, 144.3, 144.2, 143.6, 137.3, 133.6, 129.6, 123.7, 119.6, 118.3, 33.4, 30.9.

**HRMS (ESI-TOF):** *m/z* calculated for C<sub>45</sub>H<sub>48</sub>IrN<sub>3</sub> [M+Na]<sup>+</sup> 844.3346, found 844.3355.



**Tris(4-*tert*-butyl-2-phenylpyridinato)iridium(III) (Figure 3, R<sup>2</sup> = *t*-Bu)**

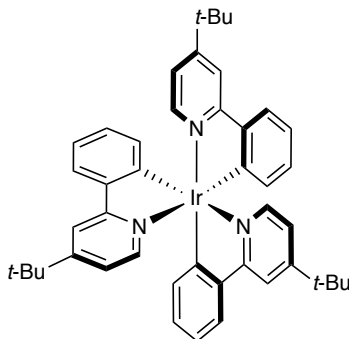

Prepared from iridium(III) acetylacetonate (0.34 mmol), heating at 230 °C for 12 hours. Chromatography was performed using a 50% CH<sub>2</sub>Cl<sub>2</sub>/hexanes eluent. The title compound was obtained as a yellow solid (121 mg, 44% yield).

**<sup>1</sup>H NMR (500 MHz, CD<sub>2</sub>Cl<sub>2</sub>):** δ 7.91 (d, *J* = 2.0 Hz, 3H), 7.70 (d, *J* = 7.7 Hz, 3H), 7.43 (d, *J* = 5.9 Hz, 3H), 6.96 (dd, *J* = 5.9, 2.0 Hz, 3H), 6.86 (td, *J* = 7.4, 1.4 Hz, 3H), 6.79 (td, *J* = 7.3, 1.4 Hz, 3H), 6.71 (d, *J* = 7.5 Hz, 3H), 1.35 (s, 27H).

**<sup>13</sup>C NMR (126 MHz, CD<sub>2</sub>Cl<sub>2</sub>):** δ 166.2, 161.5, 160.7, 147.0, 144.9, 137.4, 129.6, 123.9, 120.2, 120.1, 116.0, 35.3, 30.6.

**HRMS (ESI-TOF):** *m/z* calculated for C<sub>45</sub>H<sub>48</sub>IrN<sub>3</sub> [M+Na]<sup>+</sup> 844.3346, found 844.3345.

**Tris(2-(5'-*tert*-butylphenyl)pyridinato)iridium(III) (Figure 3, R<sup>3</sup> = *t*-Bu)<sup>31</sup>**

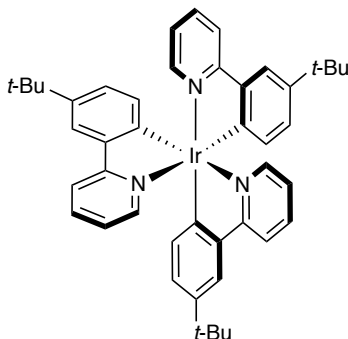

Prepared from iridium(III) acetylacetonate (0.15 mmol), heating at 240 °C for 12 hours. Chromatography was performed using a 50% CH<sub>2</sub>Cl<sub>2</sub>/hexanes eluent. The title compound was obtained as a yellow solid (17 mg, 13% yield).

**<sup>1</sup>H NMR (500 MHz, CDCl<sub>3</sub>):** δ 7.89 (d, *J* = 8.1 Hz, 3H), 7.63 (d, *J* = 2.1 Hz, 3H), 7.56 (m, 6H), 6.92 (dd, *J* = 8.0, 2.1 Hz, 3H), 6.84 (td, *J* = 5.6, 2.7 Hz, 3H), 6.68 (d, *J* = 8.0 Hz, 3H), 1.29 (s, 27H).

**<sup>13</sup>C NMR (126 MHz, CDCl<sub>3</sub>):** δ 167.4, 157.7, 147.3, 143.0, 141.9, 136.3, 135.6, 128.0, 121.6, 120.5, 118.8, 34.2, 31.6.

**HRMS (ESI-TOF):** *m/z* calculated for C<sub>45</sub>H<sub>48</sub>IrN<sub>3</sub> [M+Na]<sup>+</sup> 844.3346, found 844.3348.

**Tris(2-(4'-*tert*-butylphenyl)pyridinato)iridium(III) (Figure 3, R<sup>4</sup> = *t*-Bu)<sup>30</sup>**

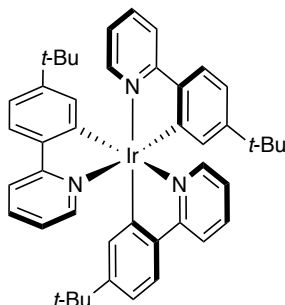

Prepared from iridium(III) acetylacetonate (3.9 mmol), heating at 210 °C for 17 hours. Chromatography was performed using a 50% CH<sub>2</sub>Cl<sub>2</sub>/hexanes eluent. The title compound was obtained as a yellow solid (1.77 g, 55% yield).

**<sup>1</sup>H NMR (500 MHz, CDCl<sub>3</sub>):** δ 7.79 (d, *J* = 8.1 Hz, 3H), 7.55 (m, 9H), 6.85 (d, *J* = 8.1 Hz, 3H), 6.81 (t, *J* = 6.5 Hz, 3H), 6.73 (s, 3H), 1.09 (s, 27H).

**<sup>13</sup>C NMR (126 MHz, CDCl<sub>3</sub>):** δ 167.0, 160.3, 151.6, 147.3, 141.9, 135.7, 135.0, 122.8, 121.6, 118.5, 117.7, 34.5, 31.4.

**HRMS (ESI-TOF):** *m/z* calculated for C<sub>45</sub>H<sub>48</sub>IrN<sub>3</sub> [M+Na]<sup>+</sup> 844.3346, found 844.3341.

**Tris(2-(4'-methoxyphenyl)pyridinato)iridium(III) (Figure 3, R<sup>4</sup> = MeO)<sup>30</sup>**

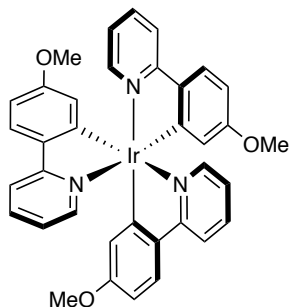

Prepared from iridium(III) acetylacetonate (1.8 mmol), heating at 210 °C for 12 hours. Chromatography was performed using a CH<sub>2</sub>Cl<sub>2</sub> eluent, but instead of subsequent precipitation with methanol, the solid was triturated with ethyl acetate and hexanes. The title compound was obtained as a yellow solid (645 mg, 48% yield).

**<sup>1</sup>H NMR (500 MHz, CDCl<sub>3</sub>):** δ 7.73 (d, *J* = 8.4 Hz, 3H), 7.55 (m, 3H), 7.51 (ddd, *J* = 8.4, 7.4, 1.7 Hz, 3H), 7.46 (ddd, *J* = 5.5, 1.6, 0.8 Hz, 3H), 6.77 (ddd, *J* = 7.0, 5.5, 1.3 Hz, 3H), 6.45 (m, 6H), 3.55 (s, 9H).

**<sup>13</sup>C NMR (126 MHz, CDCl<sub>3</sub>):** δ 166.5, 164.0, 160.8, 147.1, 137.1, 135.8, 125.3, 120.8, 120.7, 118.2, 106.7, 54.8.

**HRMS (ESI-TOF):** *m/z* calculated for C<sub>36</sub>H<sub>30</sub>IrN<sub>3</sub>O<sub>3</sub> [M+Na]<sup>+</sup> 766.1785, found 766.1779.

## Photocatalyst Synthesis: Method B<sup>32</sup>

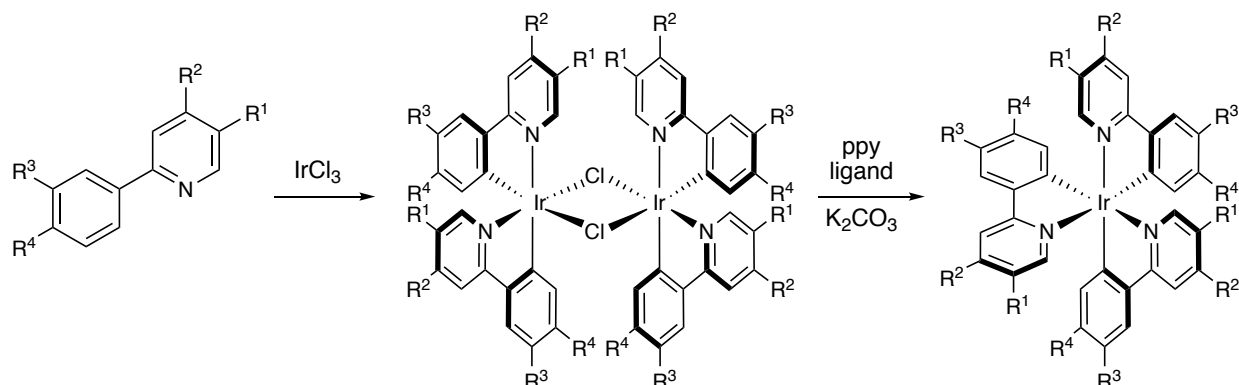

A mixture of iridium(III) chloride monohydrate (1.0 equiv) and phenylpyridine ligand (3.0 equiv) in 3:1 2-ethoxyethanol/water (0.05 M iridium) was sparged with nitrogen for 10 minutes and heated at 130 °C for 8 to 13 hours. After cooling to  $-20$  °C, the mixture was filtered, the solid was washed with cold methanol and ether, and the filtrate was discarded. The solid chloro-bridged dimer was in the next step without further purification.

A mixture of the iridium(III) chloro-bridged dimer (0.50 equiv), phenylpyridine ligand (2.0 equiv), and  $\text{K}_2\text{CO}_3$  (5.0 equiv) in glycerol (0.05 M iridium dimer) was sparged with nitrogen for 10 minutes and heated between 200 °C and 300 °C for 12 to 24 hours. After cooling to room temperature, the mixture was diluted with 1 M HCl (3 volumes with respect to glycerol), filtered, and the filtrate was discarded. The solid was filtered in a minimum of warm  $\text{CH}_2\text{Cl}_2$  and the filtrate was purified by flash chromatography on silica gel ( $\text{CH}_2\text{Cl}_2$ /hexanes eluent). The resulting yellow or orange solids were dissolved in a minimum of hot  $\text{CH}_2\text{Cl}_2$ , methanol (1-2 volumes) was added, causing a solid to precipitate, and the solvent was boiled down to a minimum workable volume such that no  $\text{CH}_2\text{Cl}_2$  remained. After standing for several hours at  $-20$  °C, the solid was collected and washed with methanol.

**Tris(4-methoxy-2-phenylpyridinato)iridium(III) (Figure 3, R<sup>2</sup> = MeO)**

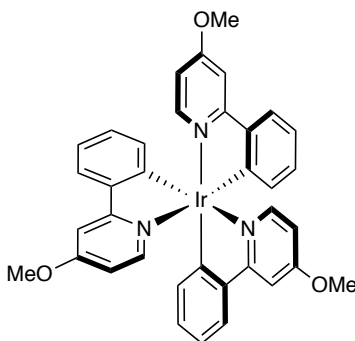

The dimer was prepared from iridium(III) chloride monohydrate (0.41 mmol), heating for 8 hours, and obtained as a yellow solid (180 mg, 74% yield). The photocatalyst was prepared from this dimer (0.075 mmol), heating at 230 °C for 12 hours. Chromatography was performed using a 50% CH<sub>2</sub>Cl<sub>2</sub>/hexanes eluent, and the title compound was obtained as a yellow solid (18 mg, 16% yield).

**<sup>1</sup>H NMR (500 MHz, CDCl<sub>3</sub>):** δ 7.59 (m, 3H), 7.37 (dd, *J* = 6.3, 1.0 Hz, 3H), 7.34 (d, *J* = 2.6 Hz, 3H), 6.85 (m, 9H), 6.46 (dd, *J* = 6.4, 2.6 Hz, 3H), 3.87 (s, 9H).

**<sup>13</sup>C NMR (126 MHz, CDCl<sub>3</sub>):** δ 168.3, 166.980 162.1, 148.1, 144.2, 137.4, 129.8, 123.7, 119.6, 109.2, 103.7, 55.5.

**HRMS (ESI-TOF):** *m/z* calculated for C<sub>36</sub>H<sub>30</sub>IrN<sub>3</sub>O<sub>3</sub> [M+Na]<sup>+</sup> 766.1785, found 766.1783.

**Tris(2-(5'-methoxyphenyl)pyridinato)iridium(III) (Figure 3, R<sup>3</sup> = MeO)<sup>30</sup>**

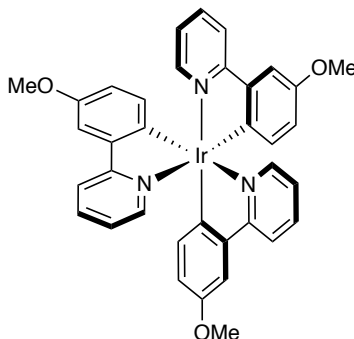

The dimer was prepared from iridium(III) chloride monohydrate (1.5 mmol), heating for 12 hours, and obtained as an orange solid (625 mg, 69% yield). The photocatalyst was prepared from this dimer (0.10 mmol), heating at 300 °C for 14 hours. Chromatography was performed using an 80 → 95% CH<sub>2</sub>Cl<sub>2</sub>/hexanes eluent, and the title compound was obtained as an orange solid (18 mg, 12% yield).

**<sup>1</sup>H NMR (500 MHz, CDCl<sub>3</sub>):** δ 7.81 (d, *J* = 8.2 Hz, 3H), 7.57 (td, *J* = 7.8, 1.7 Hz, 3H), 7.54 (d, *J* = 5.7 Hz, 3H), 7.24 (d, *J* = 2.7 Hz, 3H), 6.85 (ddd, *J* = 7.1, 5.5, 1.3 Hz, 3H), 6.71 (d, *J* = 8.3 Hz, 3H), 6.58 (dd, *J* = 8.4, 2.7 Hz, 3H), 3.77 (s, 9H).

**<sup>13</sup>C NMR (126 MHz, CDCl<sub>3</sub>):** δ 166.7, 154.4, 150.7, 147.3, 144.0, 137.3, 135.9, 122.2, 119.0, 116.9, 109.7, 55.4.

**HRMS (ESI-TOF):** *m/z* calculated for C<sub>36</sub>H<sub>30</sub>IrN<sub>3</sub>O<sub>3</sub> [M+Na]<sup>+</sup> 766.1785, found 766.1772.

**Tris(4-methoxy-2-(3'-methoxy-4'-methylphenyl)pyridinato)iridium(III) (Figure 3, R<sup>2</sup>, R<sup>3</sup> = MeO, R<sup>4</sup> = Me)**

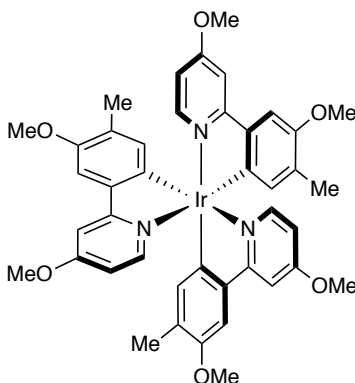

The dimer was prepared from iridium(III) chloride monohydrate (2.0 mmol), heating for 13 hours, and obtained as an orange solid (1.04 g, 75% yield). The photocatalyst was prepared from this dimer (0.10 mmol), heating at 200 °C for 24 hours. Chromatography was performed using an 80 → 95% CH<sub>2</sub>Cl<sub>2</sub>/hexanes eluent, and the title compound was obtained as an orange solid (23 mg, 13% yield).

**<sup>1</sup>H NMR (500 MHz, CD<sub>2</sub>Cl<sub>2</sub>):** δ 7.29 (m, 6H), 7.10 (s, 3H), 6.43 (m, 6H), 3.90 (s, 9H), 3.85 (s, 9H), 1.97 (s, 9H).

**<sup>13</sup>C NMR (126 MHz, CD<sub>2</sub>Cl<sub>2</sub>):** δ 168.2, 166.3, 154.0, 151.8, 148.4, 142.7, 139.3, 129.0, 108.72, 105.9, 103.8, 16.8.

**HRMS (ESI-TOF):** m/z calculated for C<sub>42</sub>H<sub>42</sub>IrN<sub>3</sub>O<sub>6</sub> [M]<sup>+</sup>• 877.2697, found 877.2712.



### Note on Photocatalyst Selection

While photocatalysts Ir[(4,5'-(MeO)<sub>2</sub>-4'-Me)ppy]<sub>3</sub> (R<sup>2</sup>, R<sup>3</sup> = MeO, R<sup>4</sup> = Me), Ir[(5'-MeO)ppy]<sub>3</sub> (R<sup>3</sup> = MeO), and Ir[(5'-*t*-Bu)ppy]<sub>3</sub> (R<sup>3</sup> = *t*-Bu) are the three most chemoselective (see Figure 3 of the manuscript), we favored photocatalyst Ir[(4'-*t*-Bu)ppy]<sub>3</sub> (R<sup>4</sup> = *t*-Bu), despite its slightly lower selectivity, because (1) it was the only photocatalyst that consistently consumed the starting alcohols completely, and (2) it could be prepared in useful yields (> 50%), whereas we were unable to obtain any of the three of the more selective photocatalysts even in 15% yields, despite efforts to improve reaction conditions or increase the scale in their synthesis.

## XI. Photophysical Properties of Photocatalysts (Figure 3)

Photocatalyst ( $\sim 3 \mu\text{mol}$ ) was dissolved in acetonitrile or  $\text{CH}_2\text{Cl}_2$  (10 mL) to prepare a  $\sim 0.3 \text{ mM}$  solution. This solution (0.10 mL) was then diluted 100-fold by adding further solvent (9.9 mL). The resulting  $\sim 3 \mu\text{M}$  solution (4 mL) was added to a screw-top 1.0 cm quartz cuvette and sparged with nitrogen for 10 minutes before obtaining UV-Vis absorption and fluorescence emission spectra, the latter obtained by irradiation at 400 nm. Wavelengths of the near-UV and visible maxima are noted, as are the high-energy wavelengths in the emission spectra corresponding to 10% of the intensity at the maximum to approximate  $E^{0-0}$ .

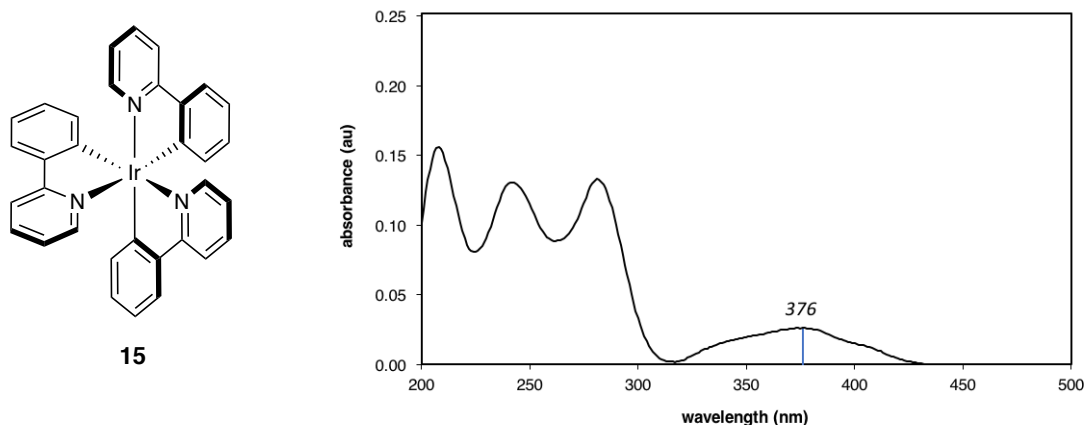

**Figure S3.** UV-Vis absorption spectrum of Ir(ppy)<sub>3</sub> (**15**) in acetonitrile.

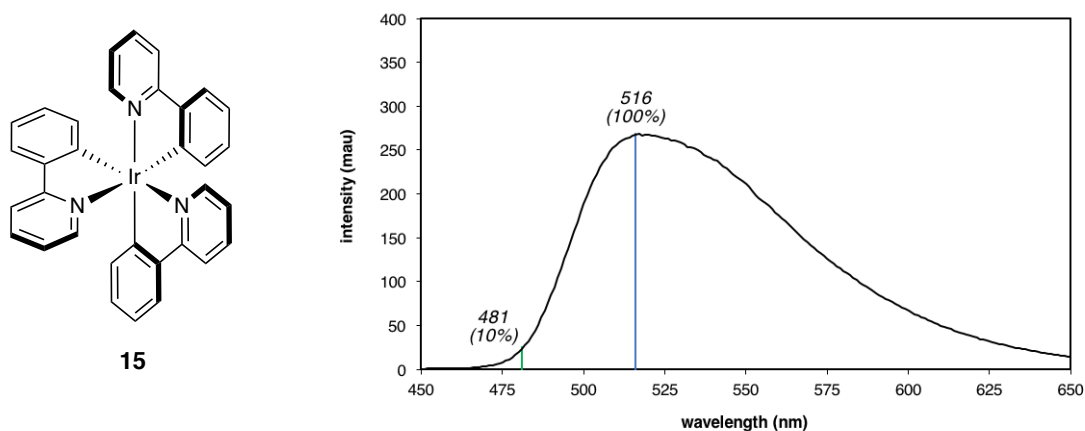

**Figure S4.** Fluorescence emission spectrum of Ir(ppy)<sub>3</sub> (**15**) in acetonitrile.

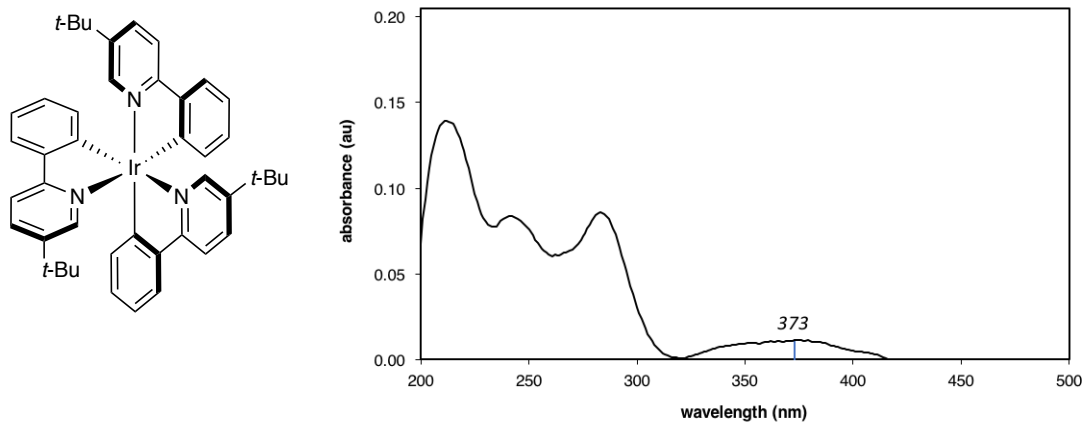

**Figure S5.** UV-Vis absorption spectrum of  $\text{Ir}[(5-t\text{-Bu})\text{ppy}]_3$  ( $R^1 = t\text{-Bu}$ ) in acetonitrile.

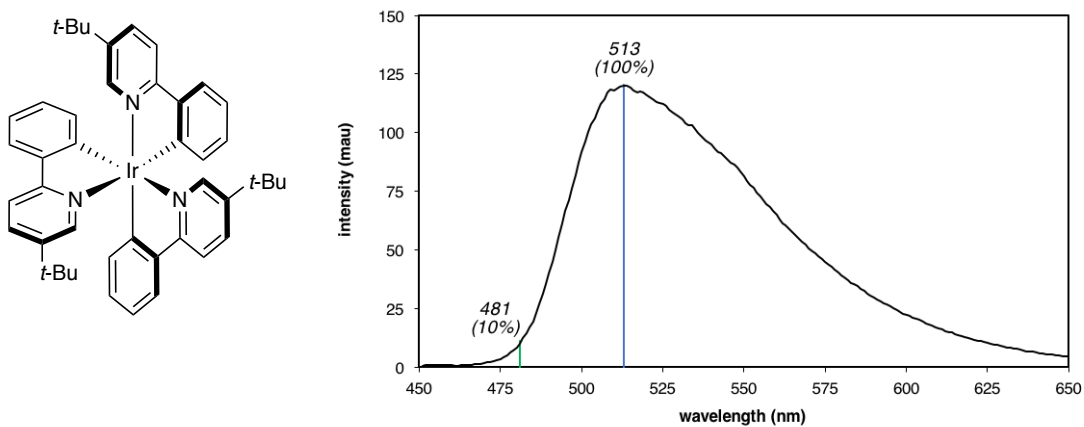

**Figure S6.** Fluorescence emission spectrum of  $\text{Ir}[(5-t\text{-Bu})\text{ppy}]_3$  ( $R^1 = t\text{-Bu}$ ) in acetonitrile.

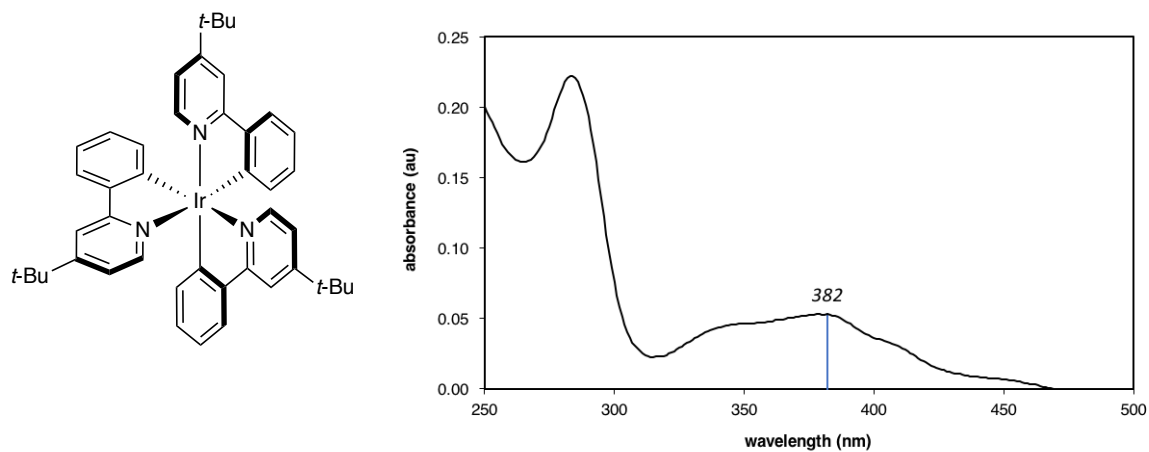

**Figure S7.** UV-Vis absorption spectrum of Ir[(4-*t*-Bu)ppy]<sub>3</sub> ( $R^2 = t$ -Bu) in CH<sub>2</sub>Cl<sub>2</sub>.

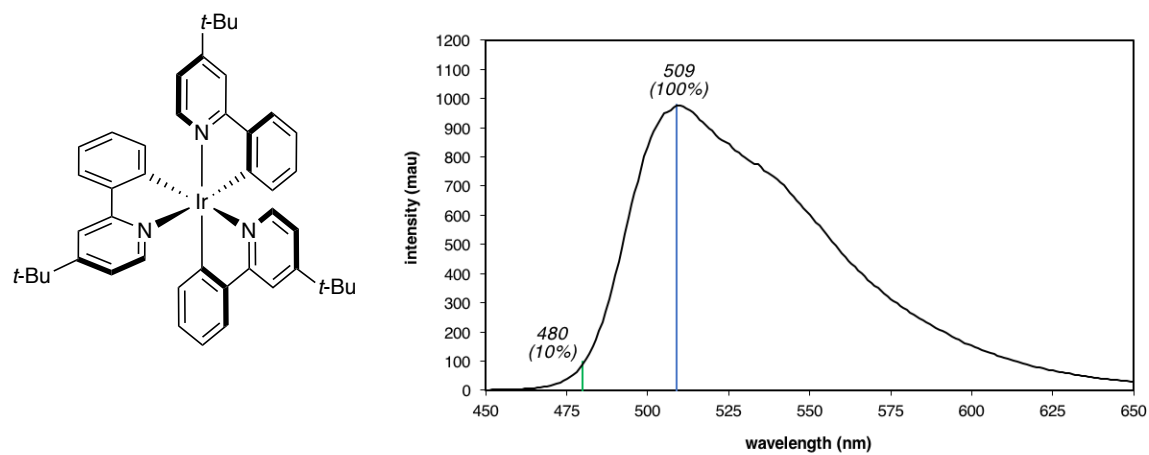

**Figure S8.** Fluorescence emission spectrum of Ir[(4-*t*-Bu)ppy]<sub>3</sub> ( $R^2 = t$ -Bu) in CH<sub>2</sub>Cl<sub>2</sub>.

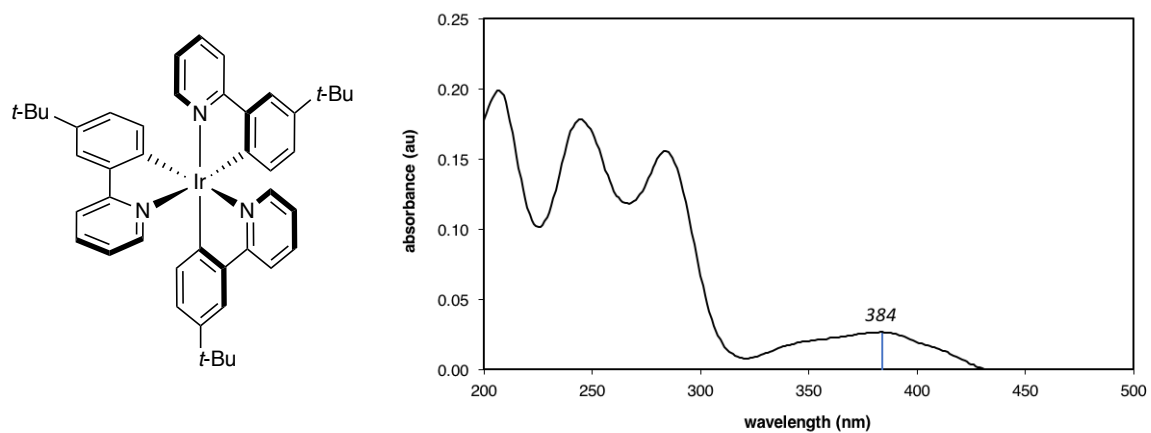

**Figure S9.** UV-Vis absorption spectrum of Ir[(5'-*t*-Bu)ppy]<sub>3</sub> (R<sup>3</sup> = *t*-Bu) in acetonitrile.

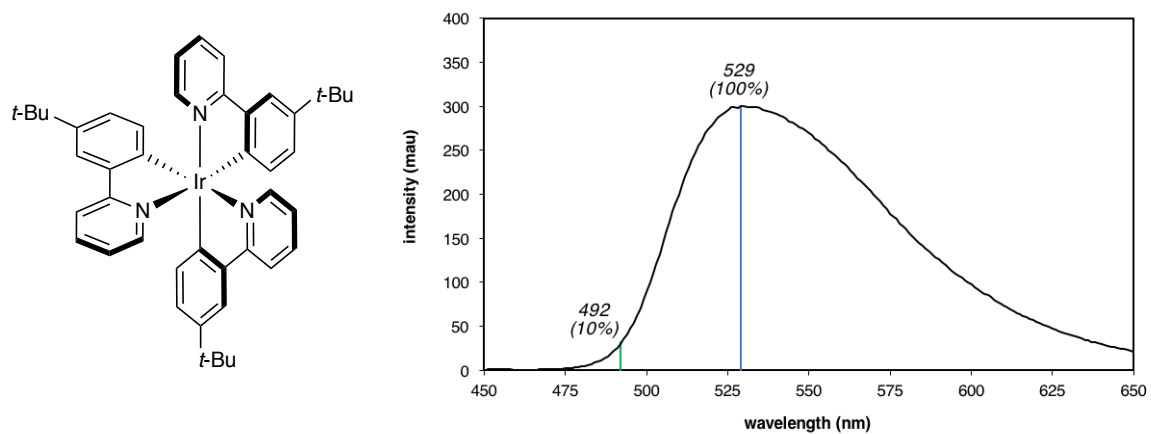

**Figure S10.** Fluorescence emission spectrum of Ir[(5'-*t*-Bu)ppy]<sub>3</sub> (R<sup>3</sup> = *t*-Bu) in acetonitrile.

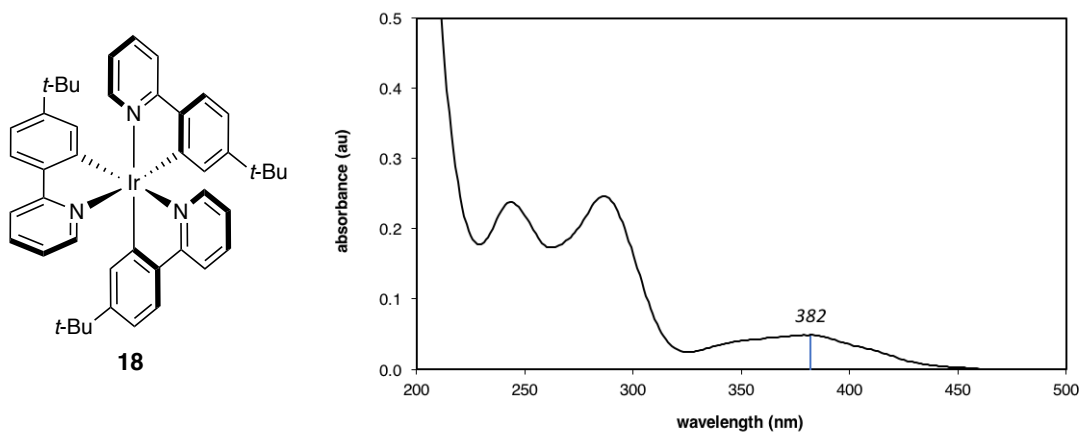

**Figure S11.** UV-Vis absorption spectrum of Ir[(4'-*t*-Bu)ppy]<sub>3</sub> (**18**, R<sup>4</sup> = *t*-Bu) in acetonitrile.

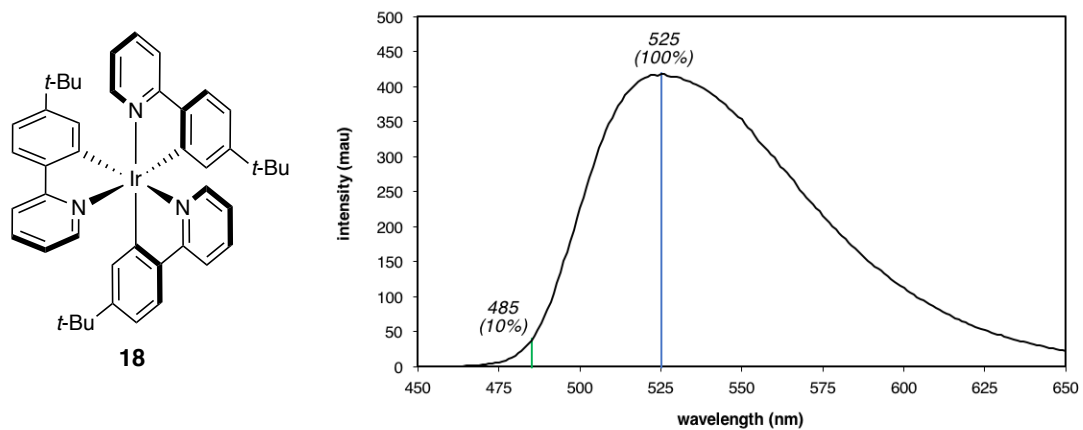

**Figure S12.** Fluorescence emission spectrum of Ir[(4'-*t*-Bu)ppy]<sub>3</sub> (**18**, R<sup>4</sup> = *t*-Bu) in acetonitrile.

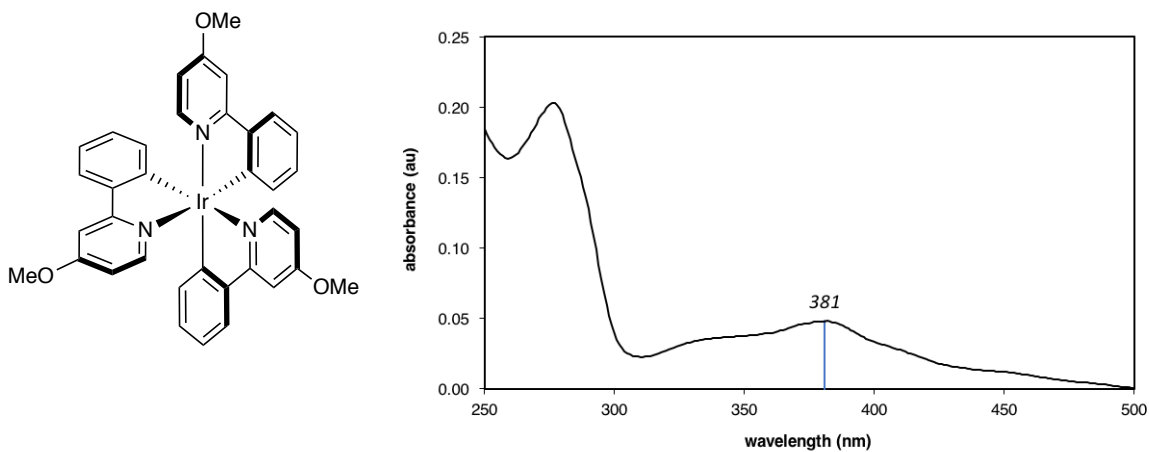

**Figure S13.** UV-Vis absorption spectrum of Ir[(4-MeO)ppy]<sub>3</sub> (R<sup>2</sup> = MeO) in CH<sub>2</sub>Cl<sub>2</sub>.

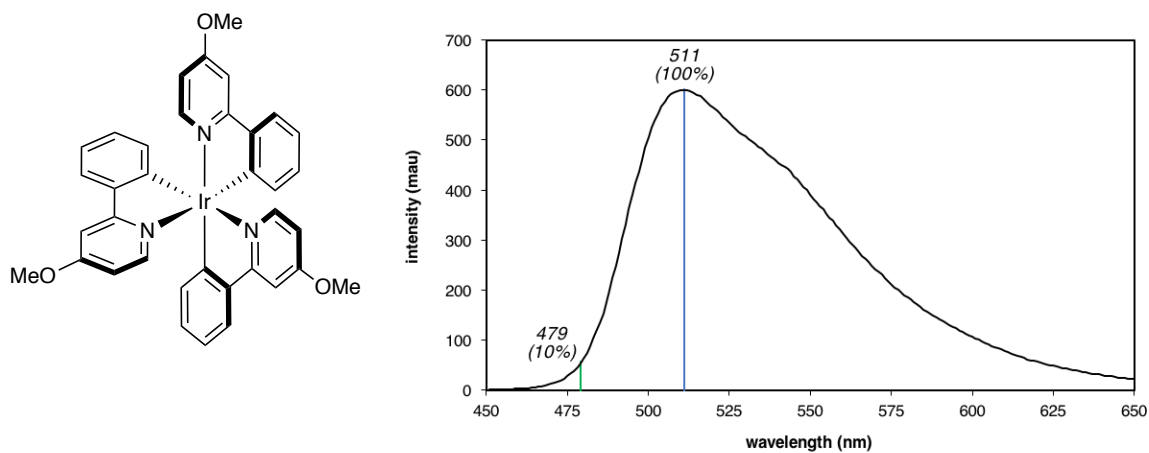

**Figure S14.** Fluorescence emission spectrum of Ir[(4-MeO)ppy]<sub>3</sub> (R<sup>2</sup> = MeO) in CH<sub>2</sub>Cl<sub>2</sub>.

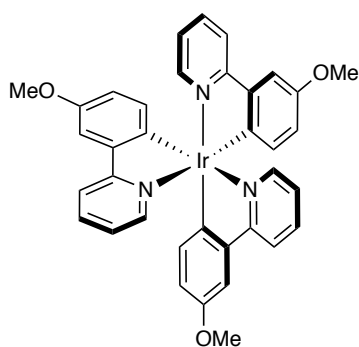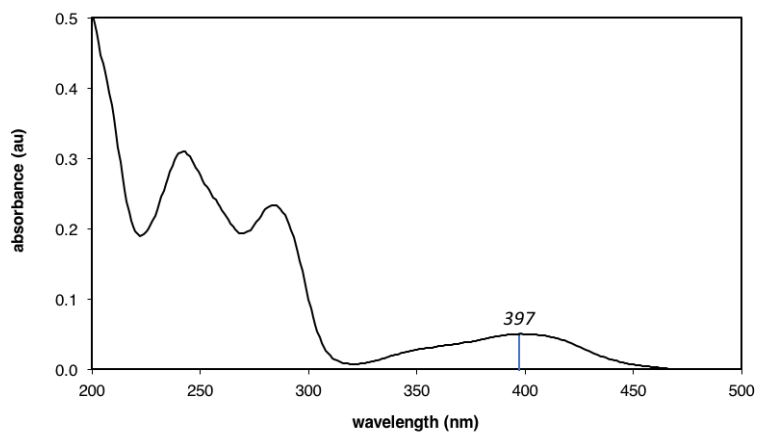

**Figure S15.** UV-Vis absorption spectrum of Ir[(5'-MeO)ppy]<sub>3</sub> (R<sup>3</sup> = MeO) in acetonitrile.

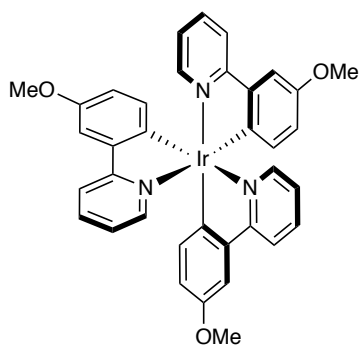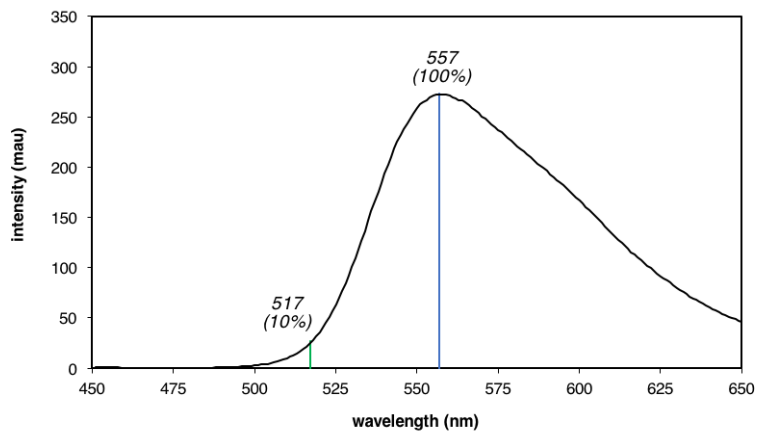

**Figure S16.** Fluorescence emission spectrum of Ir[(5'-MeO)ppy]<sub>3</sub> (R<sup>3</sup> = MeO) in acetonitrile.



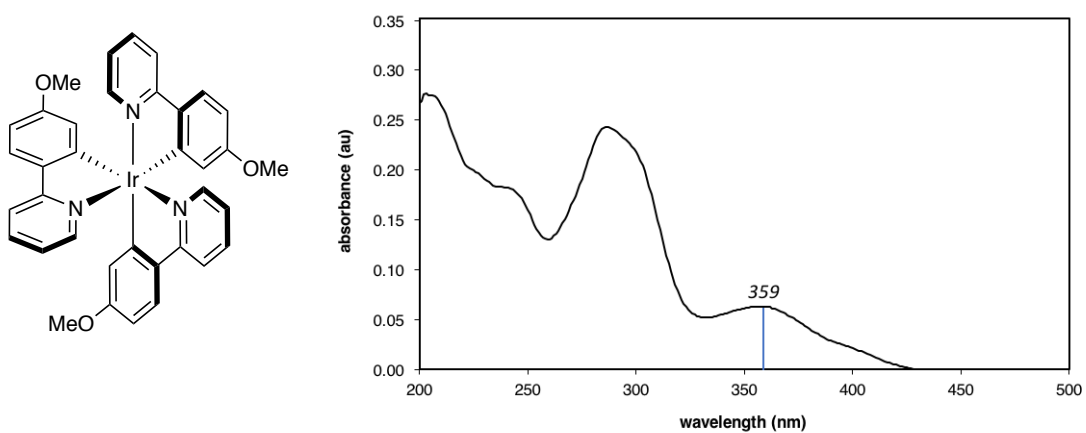

**Figure S17.** UV-Vis absorption spectrum of Ir[(4'-MeO)ppy]<sub>3</sub> (R<sup>4</sup> = MeO) in acetonitrile.

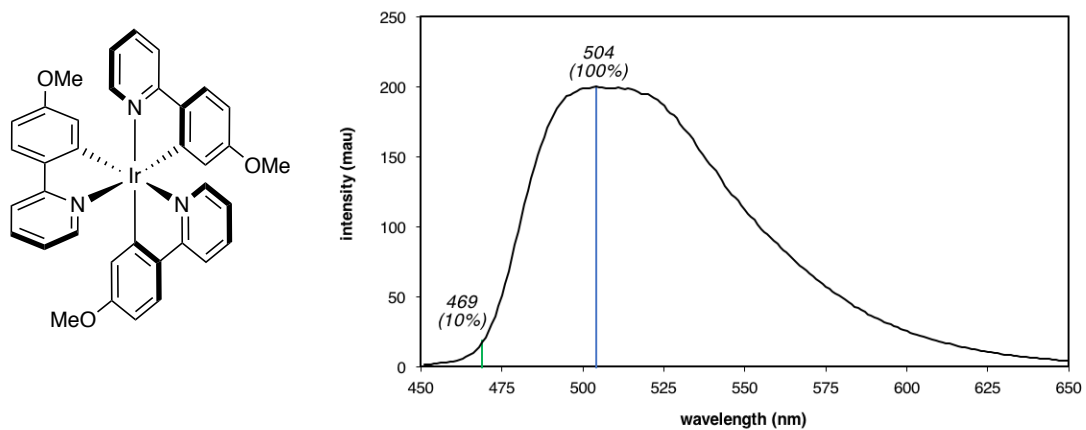

**Figure S18.** Fluorescence emission spectrum of Ir[(4'-MeO)ppy]<sub>3</sub> (R<sup>4</sup> = MeO) in acetonitrile.

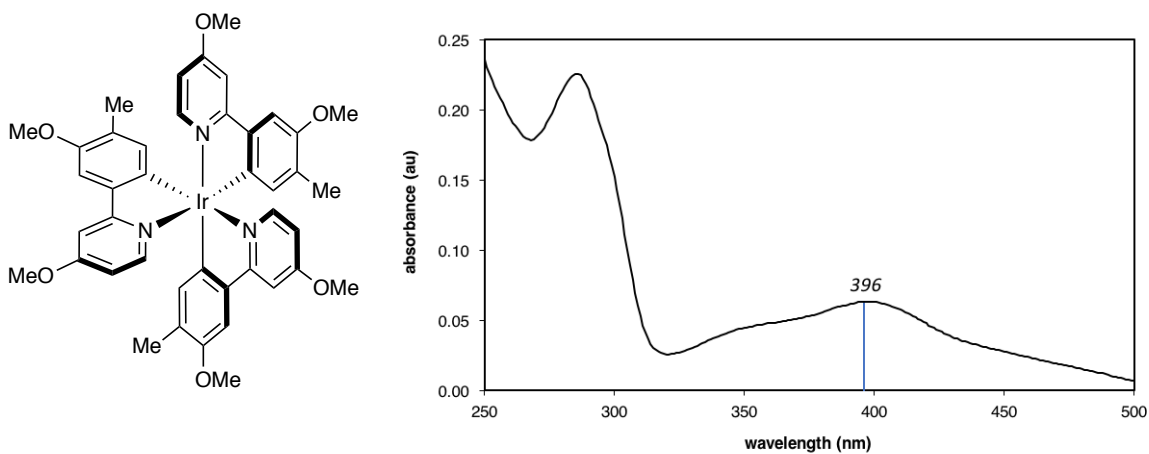

**Figure S19.** UV-Vis absorption spectrum of  $\text{Ir}[(4,5'-(\text{MeO})_2-4'\text{-Me})\text{ppy}]_3$  ( $R^2, R^3 = \text{MeO}, R^4 = \text{Me}$ ) in  $\text{CH}_2\text{Cl}_2$ .

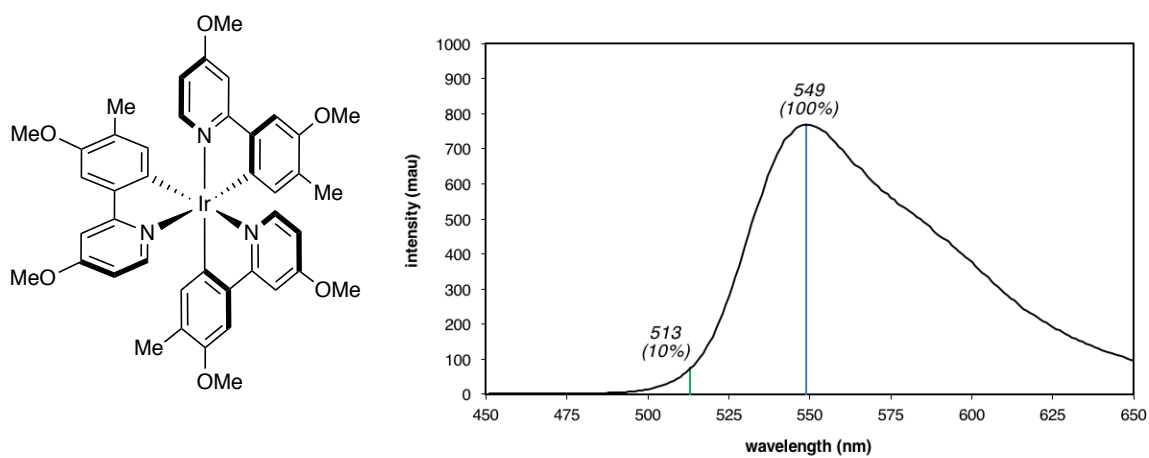

**Figure S20.** Fluorescence emission spectrum of  $\text{Ir}[(4,5'-(\text{MeO})_2-4'\text{-Me})\text{ppy}]_3$  ( $R^2, R^3 = \text{MeO}, R^4 = \text{Me}$ ) in  $\text{CH}_2\text{Cl}_2$ .

## XII. Electrochemical Properties of Photocatalysts (Figure 3)

Photocatalyst (0.020 mmol) and tetrabutylammonium hexafluorophosphate (775 mg, 2.0 mmol) were dissolved in acetonitrile or  $\text{CH}_2\text{Cl}_2$  (20 mL) in a 25 mL 3-neck flask (as little as 1/5 of this scale was used for photocatalysts obtained in small quantities). The solution was sparged with nitrogen for 10 minutes and analyzed by cyclic voltammetry.

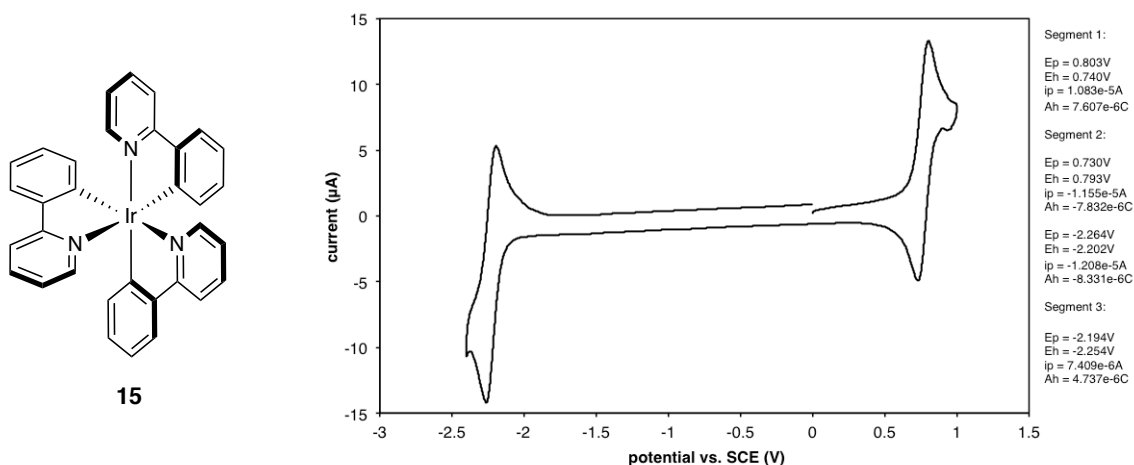

**Figure S21.** Cyclic voltammogram of Ir(ppy)<sub>3</sub> (**15**) in acetonitrile. Scanned from 0 V to +1 V to –2.5 V to 0 V at 0.1 V/s.

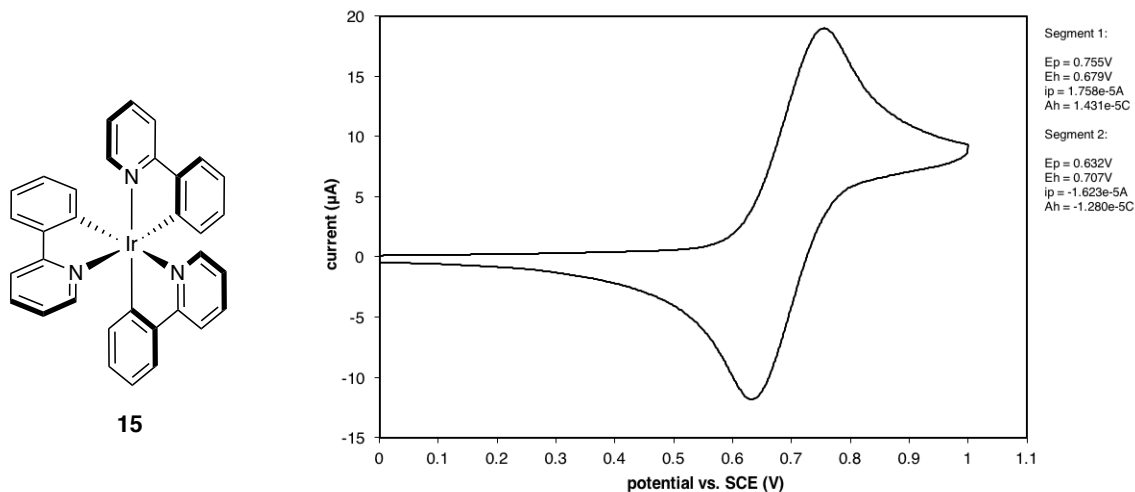

**Figure S22.** Cyclic voltammogram of Ir(ppy)<sub>3</sub> (**15**) in  $\text{CH}_2\text{Cl}_2$ . Scanned from 0 V to +1 V to 0 V at 0.1 V/s.

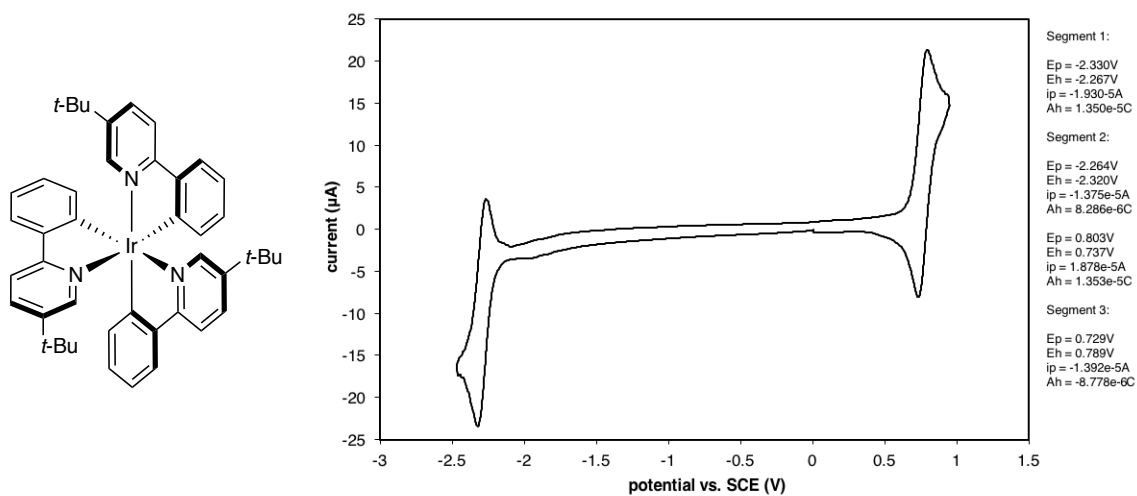

**Figure S23.** Cyclic voltammogram of  $\text{Ir}[(5-t\text{-Bu})\text{ppy}]_3$  ( $R^1 = t\text{-Bu}$ ) in acetonitrile. Scanned from 0 V to  $-2.47$  V to  $+0.95$  V to 0 V at  $0.1$  V/s.

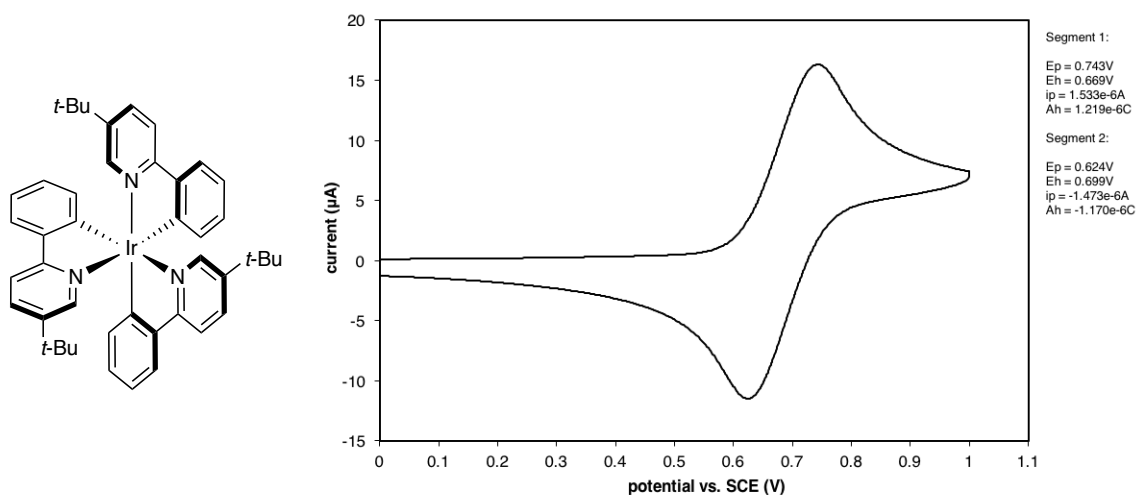

**Figure S24.** Cyclic voltammogram of  $\text{Ir}[(5-t\text{-Bu})\text{ppy}]_3$  ( $R^1 = t\text{-Bu}$ ) in  $\text{CH}_2\text{Cl}_2$ . Scanned from 0 V to  $+1$  V to 0 V at  $0.1$  V/s.

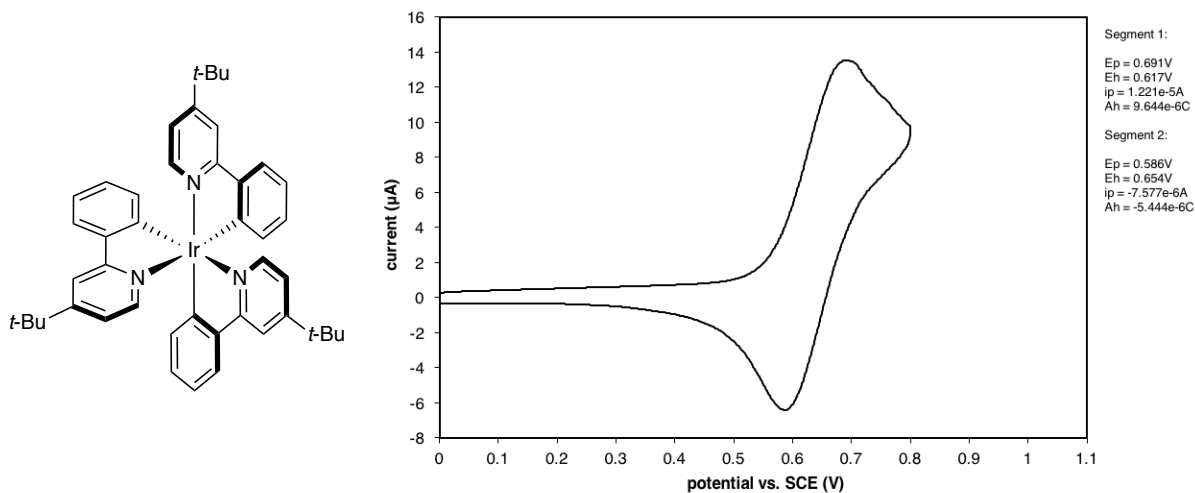

**Figure S25.** Cyclic voltammogram of Ir[(4-*t*-Bu)ppy]<sub>3</sub> (R<sup>2</sup> = *t*-Bu) in CH<sub>2</sub>Cl<sub>2</sub>. Scanned from 0 V to +0.8 V to 0 V at 0.1 V/s.

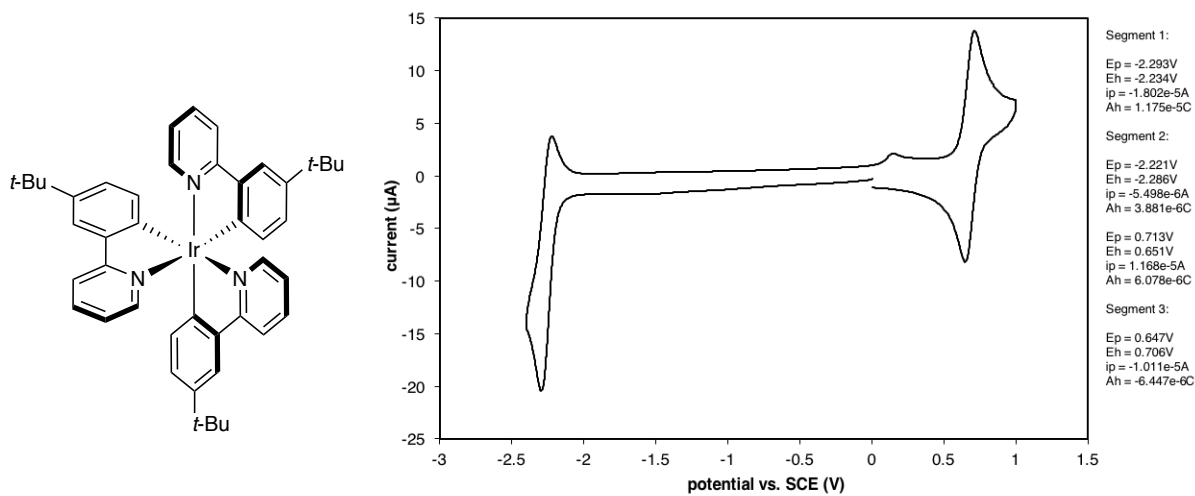

**Figure S26.** Cyclic voltammogram of Ir[(5'-*t*-Bu)ppy]<sub>3</sub> (R<sup>3</sup> = *t*-Bu) in acetonitrile. Scanned from 0 V to -2.4 V to +1 V to 0 V at 0.1 V/s.

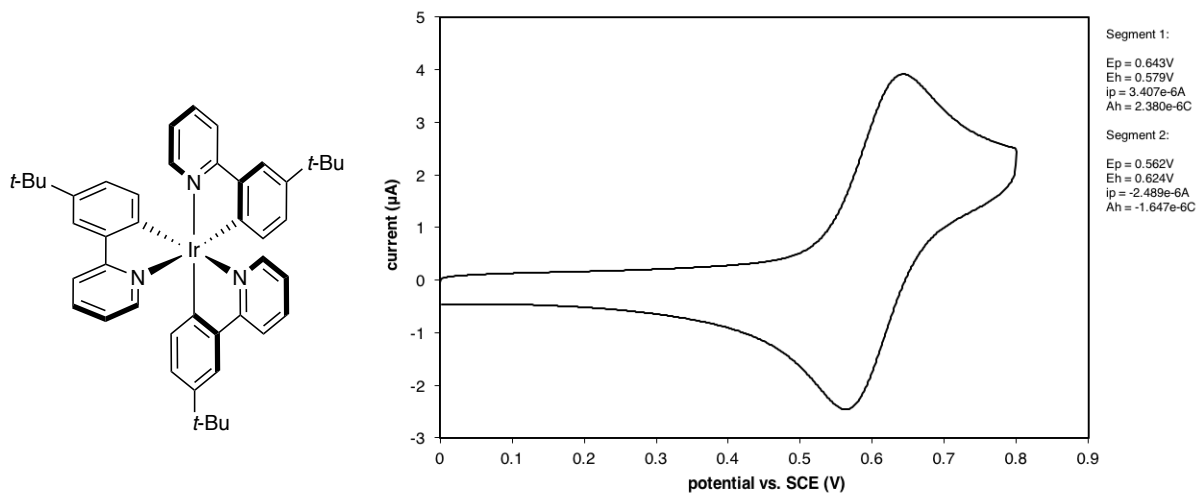

**Figure S27.** Cyclic voltammogram of Ir[(5'-*t*-Bu)ppy]<sub>3</sub> ( $R^3 = t\text{-Bu}$ ) in CH<sub>2</sub>Cl<sub>2</sub>. Scanned from 0 V to +0.8 V to 0 V at 0.1 V/s.

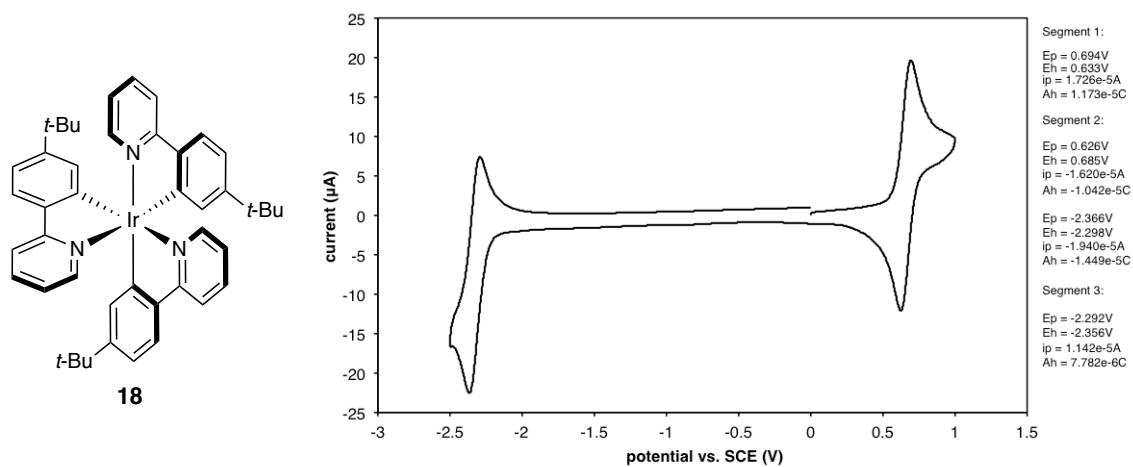

**Figure S28.** Cyclic voltammogram of Ir[(4'-*t*-Bu)ppy]<sub>3</sub> ( $R^4 = t\text{-Bu}$ ) in acetonitrile. Scanned from 0 V to +1 V to -2.5 V to 0 V at 0.1 V/s.

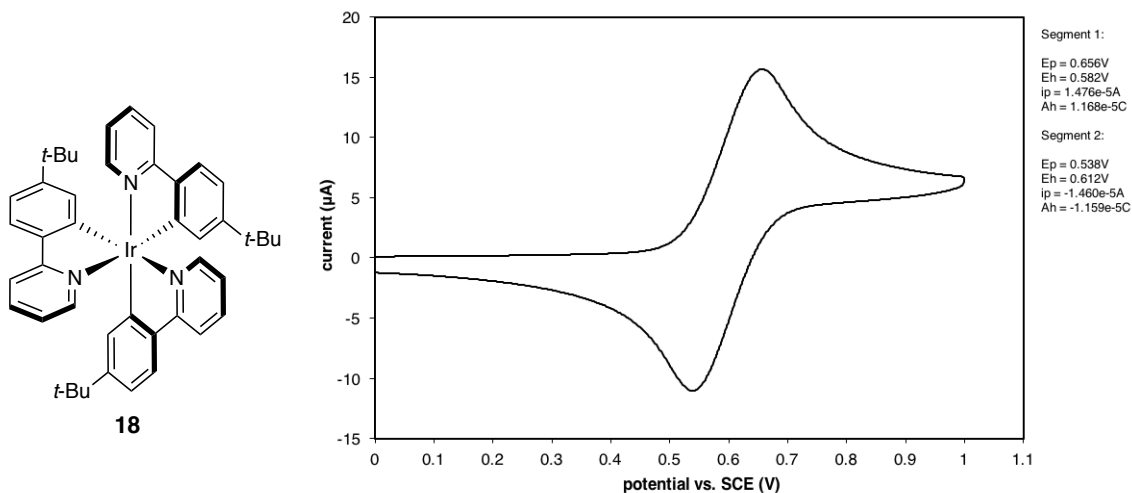

**Figure S29.** Cyclic voltammogram of  $\text{Ir}[(4'\text{-}t\text{-Bu})\text{ppy}]_3$  ( $R^4 = t\text{-Bu}$ ) in  $\text{CH}_2\text{Cl}_2$ . Scanned from 0 V to +1 V to 0 V at 0.1 V/s.

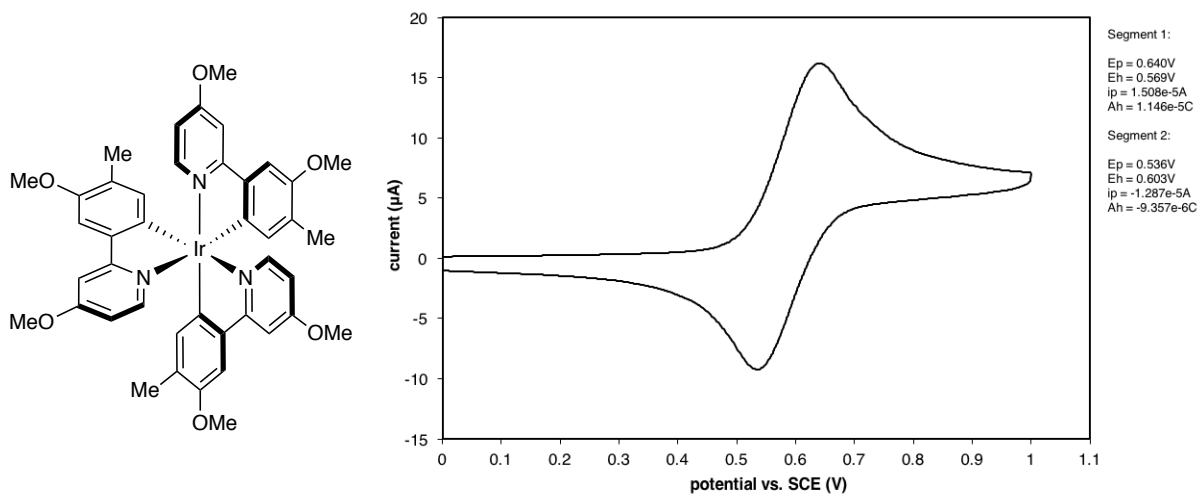

**Figure S30.** Cyclic voltammogram of  $\text{Ir}[(4\text{-MeO})\text{ppy}]_3$  ( $R^2 = \text{MeO}$ ) in  $\text{CH}_2\text{Cl}_2$ . Scanned from 0 V to +1 V to 0 V at 0.1 V/s.

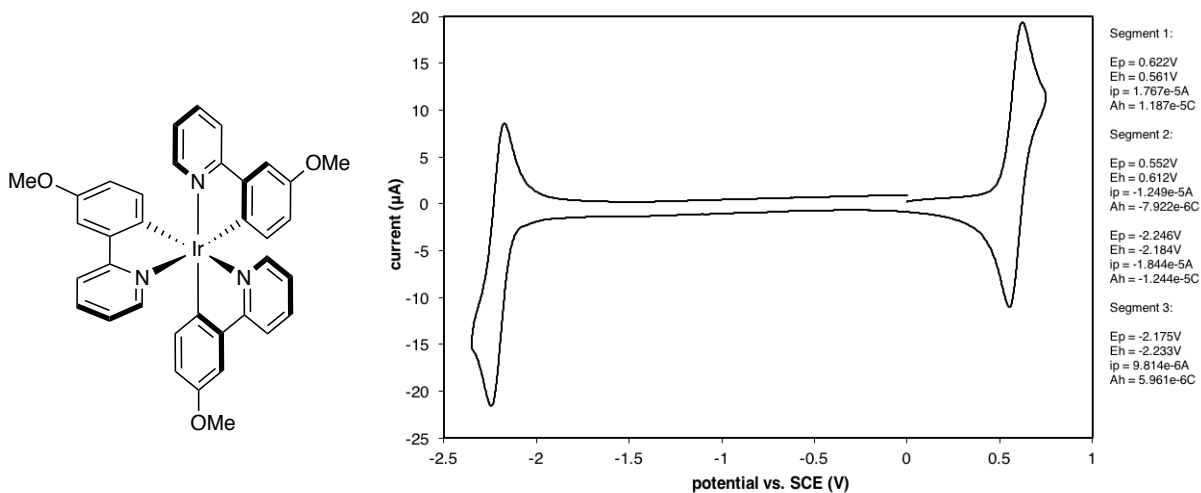

**Figure S31.** Cyclic voltammogram of  $\text{Ir}[(5'\text{-MeO})\text{ppy}]_3$  ( $\text{R}^3 = \text{MeO}$ ) in acetonitrile. Scanned from 0 V to +0.75 V to -2.35 V to 0 V at 0.1 V/s.

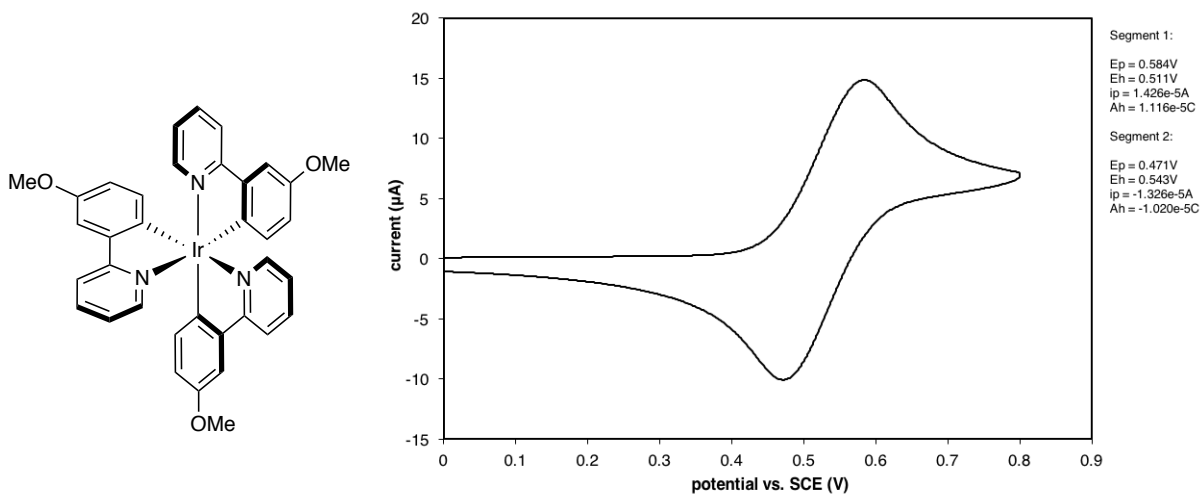

**Figure S32.** Cyclic voltammogram of  $\text{Ir}[(5'\text{-MeO})\text{ppy}]_3$  ( $\text{R}^3 = \text{MeO}$ ) in  $\text{CH}_2\text{Cl}_2$ . Scanned from 0 V to +0.8 V to 0 V at 0.1 V/s.



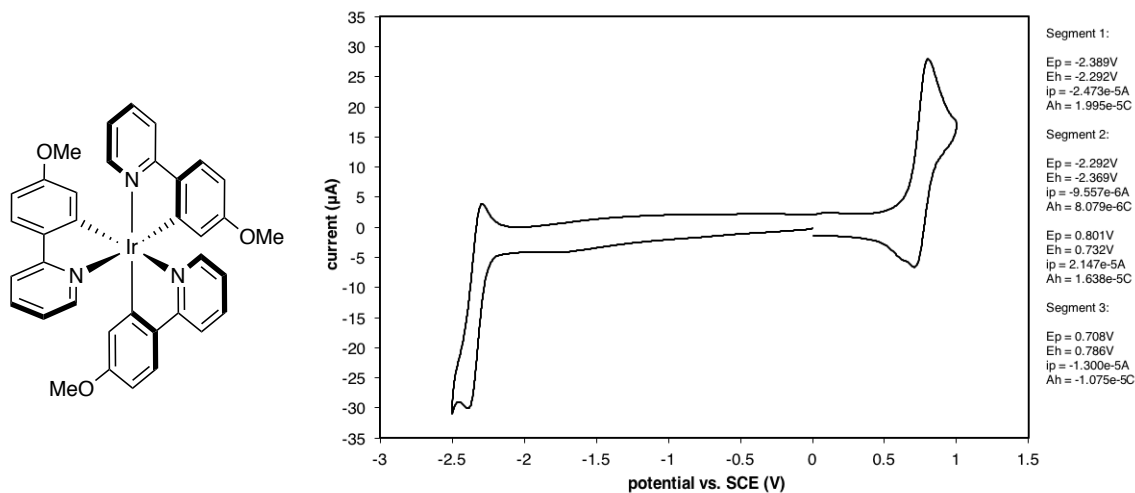

**Figure S33.** Cyclic voltammogram of  $\text{Ir}[(4'\text{-MeO})\text{ppy}]_3$  ( $\text{R}^4 = \text{MeO}$ ) in acetonitrile. Scanned from 0 V to -2.45 V to +1 V to 0 V at 0.1 V/s.

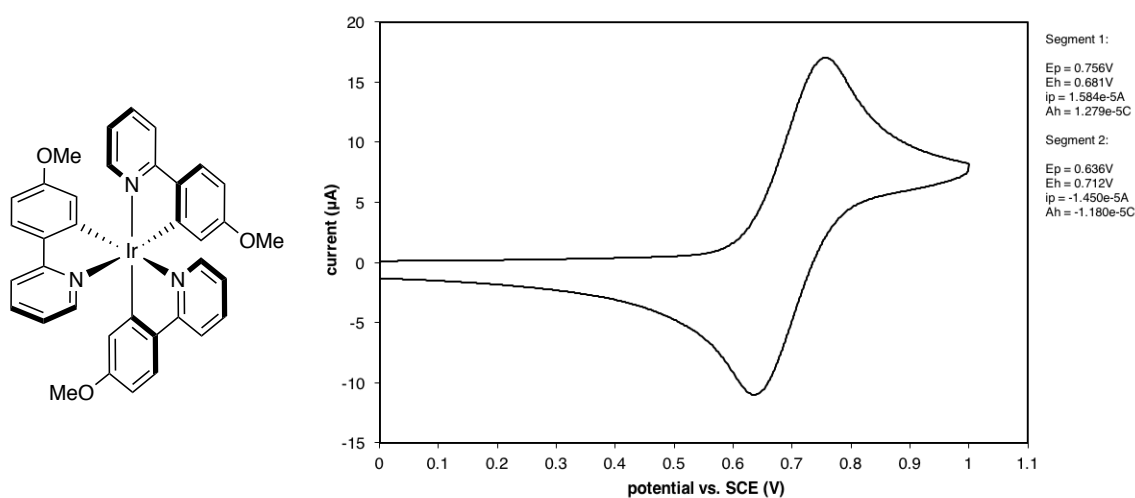

**Figure S34.** Cyclic voltammogram of  $\text{Ir}[(4'\text{-MeO})\text{ppy}]_3$  ( $\text{R}^4 = \text{MeO}$ ) in  $\text{CH}_2\text{Cl}_2$ . Scanned from 0 V to +1 V to 0 V at 0.1 V/s.

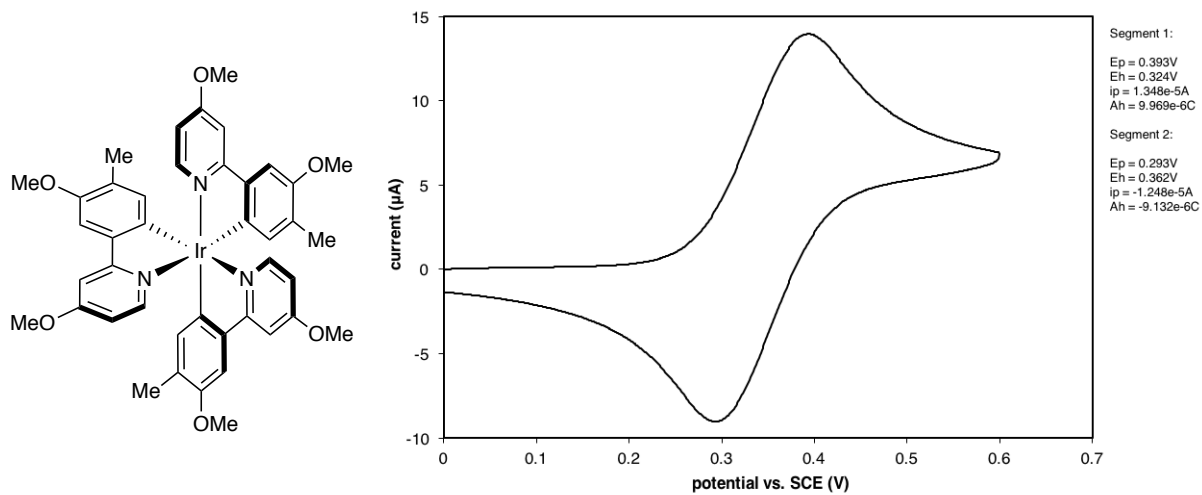

**Figure S35.** Cyclic voltammogram of  $\text{Ir}[(4,5'-(\text{MeO})_2-4'\text{-Me})\text{ppy}]_3$  ( $R^2, R^3 = \text{MeO}, R^4 = \text{Me}$ ) in  $\text{CH}_2\text{Cl}_2$ . Scanned from 0 V to +0.6 V to 0 V at 0.1 V/s.

### XIII. Comprehensive Summary of Photocatalyst Properties (Figure 3)

**Table S10.** Complete list of properties of all photocatalysts used in this investigation.

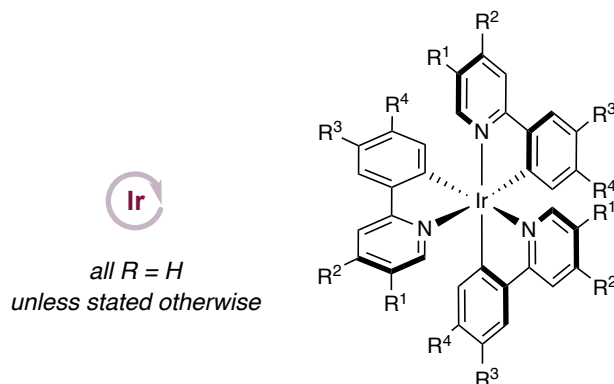

|  | $E_{1/2}^{\text{red}}$ vs. SCE in $\text{CH}_2\text{Cl}_2$ (V) |                              | $E_{1/2}^{\text{red}}$ vs. SCE in $\text{CH}_3\text{CN}$ (V) |                              |                             |                              | absorbance & emission (nm)          |                                      |                                    | $E^{0-0}$ (eV) |
|-----------------------------------------------------------------------------------|----------------------------------------------------------------|------------------------------|--------------------------------------------------------------|------------------------------|-----------------------------|------------------------------|-------------------------------------|--------------------------------------|------------------------------------|----------------|
|                                                                                   | $\text{Ir}^{\text{IV/III}}$                                    | $\text{Ir}^{\text{IV/*III}}$ | $\text{Ir}^{\text{IV/III}}$                                  | $\text{Ir}^{\text{IV/*III}}$ | $\text{Ir}^{\text{III/II}}$ | $\text{Ir}^{\text{*III/II}}$ | $\lambda_{\text{max}}^{\text{abs}}$ | $\lambda_{\text{onset}}^{\text{em}}$ | $\lambda_{\text{max}}^{\text{em}}$ |                |
| $\text{Ir}(\text{ppy})_3$                                                         | +0.69                                                          | -1.88                        | +0.77                                                        | -1.81                        | -2.23                       | +0.35                        | 376                                 | 481                                  | 516                                | 2.58           |
| $R^1 = t\text{-Bu}$                                                               | +0.68                                                          | -1.89                        | +0.77                                                        | -1.81                        | -2.30                       | +0.28                        | 373                                 | 481                                  | 513                                | 2.58           |
| $R^2 = t\text{-Bu}$                                                               | +0.64                                                          | -1.94                        | <i>insoluble</i>                                             |                              |                             |                              | 382                                 | 480                                  | 509                                | 2.58           |
| $R^3 = t\text{-Bu}$                                                               | +0.60                                                          | -1.92                        | +0.68                                                        | -1.84                        | -2.26                       | +0.26                        | 384                                 | 492                                  | 529                                | 2.52           |
| $R^4 = t\text{-Bu}$                                                               | +0.60                                                          | -1.96                        | +0.66                                                        | -1.90                        | -2.33                       | +0.23                        | 382                                 | 485                                  | 525                                | 2.56           |
| $R^2 = \text{MeO}$                                                                | +0.59                                                          | -2.00                        | <i>insoluble</i>                                             |                              |                             |                              | 381                                 | 479                                  | 511                                | 2.59           |
| $R^3 = \text{MeO}$                                                                | +0.53                                                          | -1.87                        | +0.59                                                        | -1.81                        | -2.21                       | +0.19                        | 397                                 | 517                                  | 557                                | 2.40           |
| $R^4 = \text{MeO}$                                                                | +0.70                                                          | -1.95                        | +0.76                                                        | -1.89                        | -2.34                       | +0.26                        | 359                                 | 469                                  | 504                                | 2.64           |
| $R^2, R^3 = \text{MeO},$<br>$R^4 = \text{Me}$                                     | +0.34                                                          | -2.07                        | <i>insoluble</i>                                             |                              |                             |                              | 396                                 | 513                                  | 549                                | 2.42           |

To be consistent with much of the electrochemical literature, we attempted to acquire all the data in  $\text{CH}_3\text{CN}$  whenever possible. Three photocatalysts were insoluble in all solvents we evaluated except for  $\text{CH}_2\text{Cl}_2$ , however, necessitating their study in this solvent. Thus, in our attempt to correlate the photocatalysts' performance in the enantioselective  $\alpha$ -benzylation reaction with their electrochemical potentials, we also obtained all  $\text{Ir}^{\text{IV/III}}$  data (and estimated the associated excited state potential for  $\text{Ir}^{\text{IV/*III}}$ ) in this medium to be consistent throughout our analysis, so these data are presented in Figure 3. Solvent reduction occurred in  $\text{CH}_2\text{Cl}_2$  before an  $\text{Ir}^{\text{III/II}}$  signal was observed, so for these values (and the associated excited state potential for  $\text{Ir}^{\text{*III/II}}$ ), data in  $\text{CH}_3\text{CN}$  are provided in Figure 3, with no measurements available for the three insoluble photocatalysts.

The Ir<sup>IV/III</sup> and Ir<sup>IV/\*III</sup> potentials in CH<sub>3</sub>CN, obtained where possible but not listed in Figure 3, are also provided in Table S10 for completeness.

The excited state potentials were estimated using the Rehm-Weller equations,<sup>33</sup>

$$E_{\text{ox}}^{\circ*} = E_{\text{ox}}^{\circ'} - E^{0-0}, \text{ and}$$

$$E_{\text{red}}^{\circ*} = E_{\text{red}}^{\circ'} + E^{0-0},$$

where  $E^{\circ*}$  is the excited state potential,  $E^{\circ'}$  is the ground state potential, and  $E^{0-0}$  is the energy gap between the zero-level vibrational levels of the ground and excited states.  $E^{\text{ox}}$  is to the Ir<sup>IV/III</sup> reduction potential and  $E^{\text{red}}$  is the Ir<sup>III/II</sup> potential.  $E^{0-0}$  is approximated as the high-energy onset of phosphorescence where the emission intensity is 10% of that observed at the maximum emission wavelength.<sup>34</sup>

#### XIV. Electrochemical Properties of Substrates (Table 4)

Substrate (0.020 mmol) and tetrabutylammonium hexafluorophosphate (775 mg, 2.0 mmol) were dissolved in acetonitrile (20 mL) in a 25 mL 3-neck flask. The solution was sparged with nitrogen for 10 minutes and studied by cyclic voltammetry.

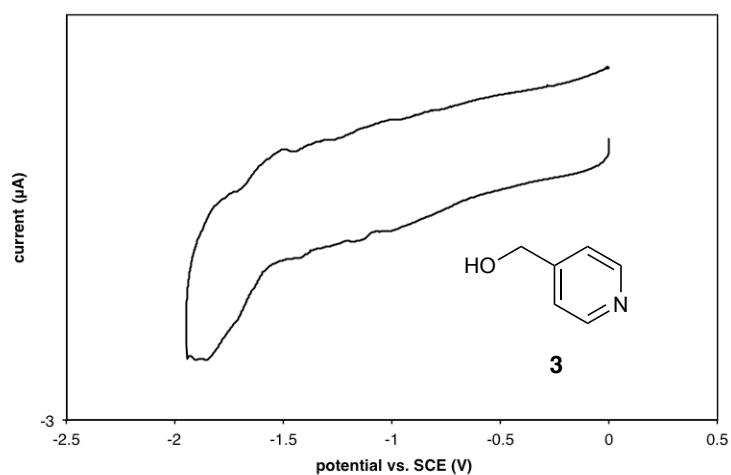

**Figure S36.** Cyclic voltammogram of 4-(hydroxymethyl)pyridine (**3**). Scanned from 0 V to -2.0 V to 0 V at 0.1 V/s.

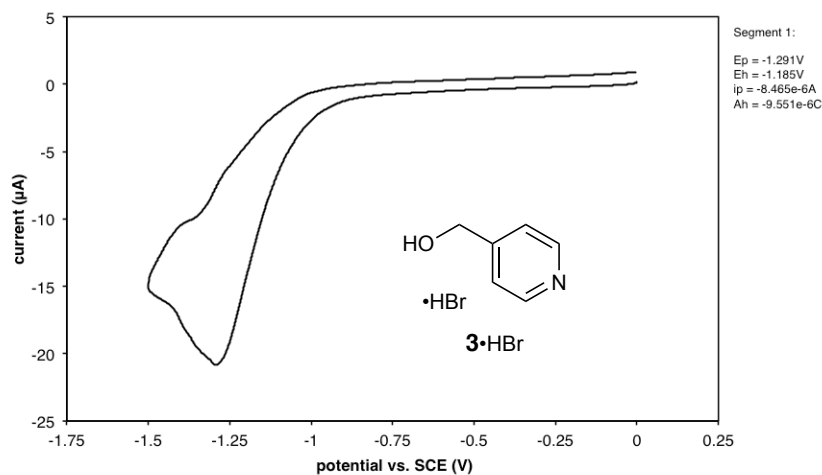

**Figure S37.** Cyclic voltammogram of 4-(hydroxymethyl)pyridine (**3**)•HBr. Scanned from 0 V to -1.5 V to 0 V at 0.1 V/s.

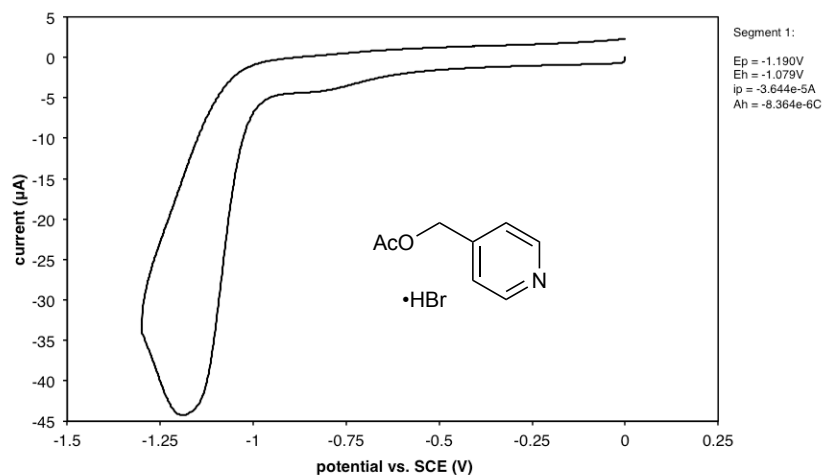

**Figure S38.** Cyclic voltammogram of 4-(acetoxymethyl)pyridine•HBr. Scanned from 0 V to – 1.25 V to 0 V at 0.1 V/s.

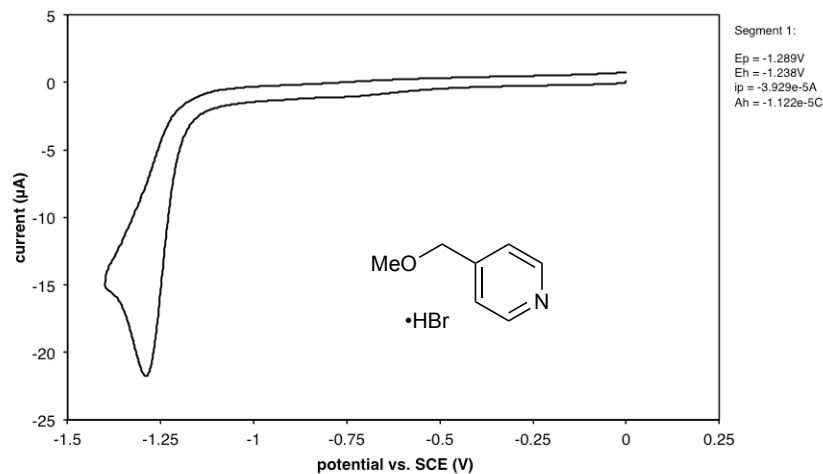

**Figure S39.** Cyclic voltammogram of 4-(methoxymethyl)pyridine•HBr. Scanned from 0 V to – 1.4 V to 0 V at 0.1 V/s.

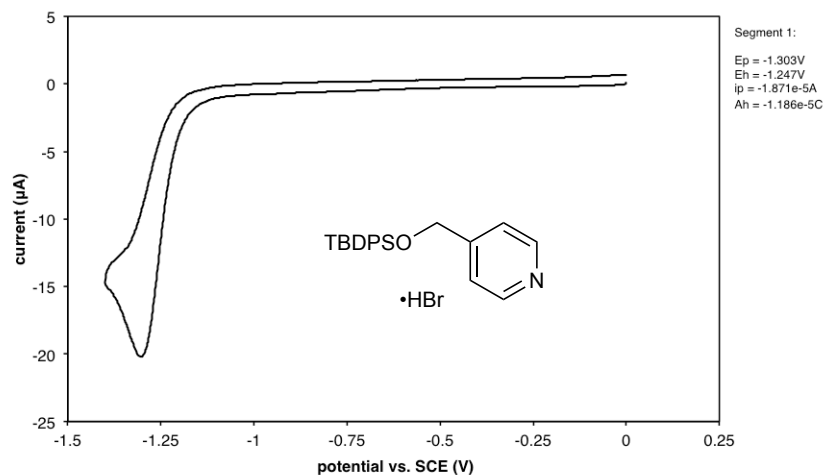

**Figure S40.** Cyclic voltammogram of 4-(*tert*-butyldimethylsiloxymethyl)pyridine•HBr. Scanned from 0 V to -1.4 V to 0 V at 0.1 V/s.

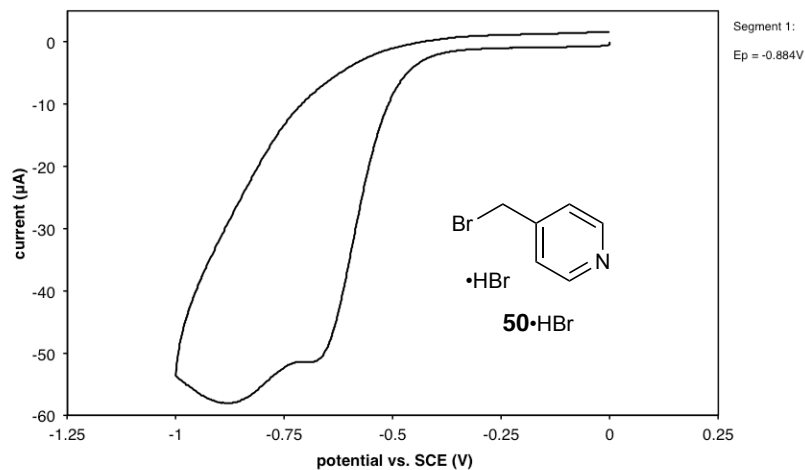

**Figure S41.** Cyclic voltammogram of 4-(bromomethyl)pyridine (**50**)•HBr. Scanned from 0 V to -1.0 V to 0 V at 0.1 V/s.

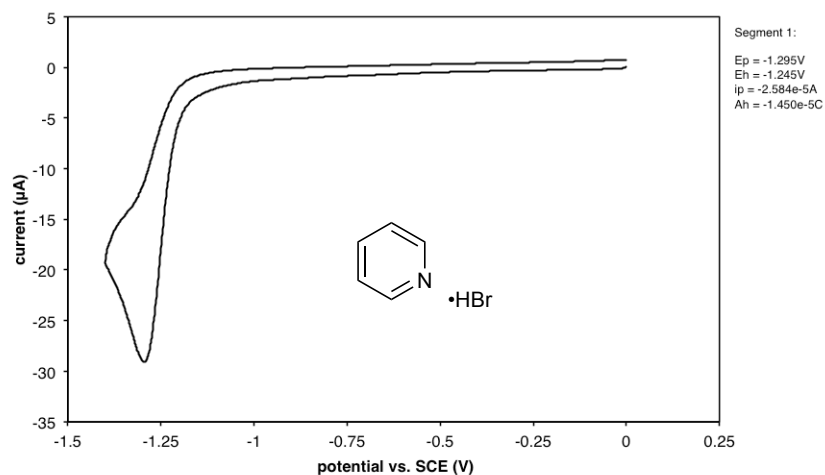

**Figure S42.** Cyclic voltammogram of pyridine•HBr. Scanned from 0 V to -1.4 V to 0 V at 0.1 V/s.

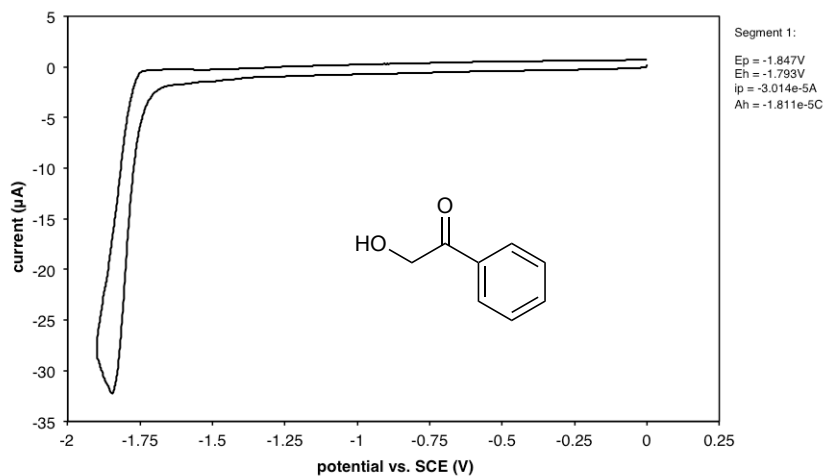

**Figure S43.** Cyclic voltammogram of  $\alpha$ -hydroxyacetophenone. Scanned from 0 V to -1.9 V to 0 V at 0.1 V/s.



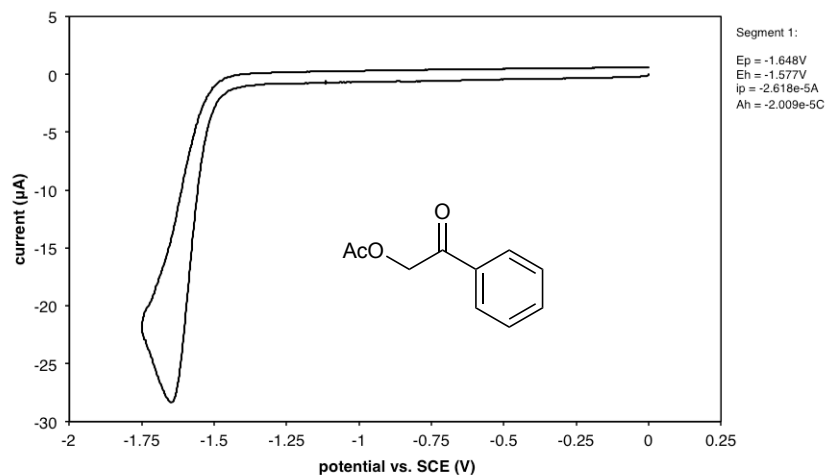

**Figure S44.** Cyclic voltammogram of  $\alpha$ -acetoxyacetophenone. Scanned from 0 V to -1.75 V to 0 V at 0.1 V/s.

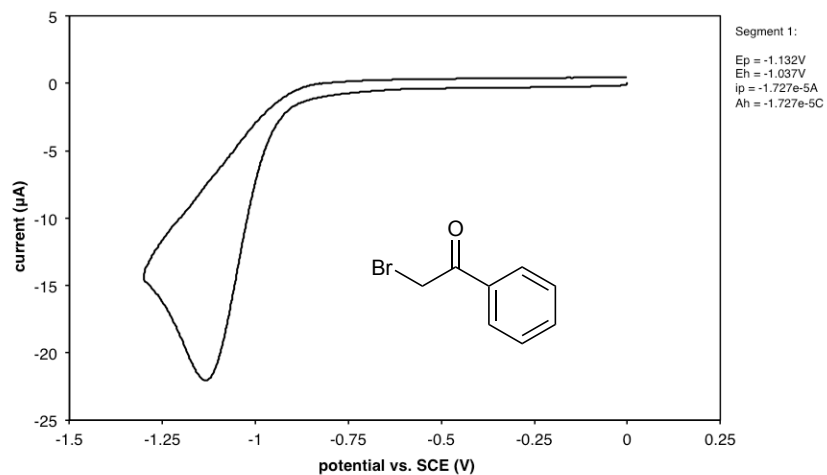

**Figure S45.** Cyclic voltammogram of  $\alpha$ -bromoacetophenone. Scanned from 0 V to -1.3 V to 0 V at 0.1 V/s.

## XV. Electrochemical Properties of Catalytically-Generated Enamine (Scheme 2)

Solutions of either octanal (**45**) (31  $\mu\text{L}$ , 0.20 mmol), organocatalyst **8** (22 mg, 0.10 mmol), or of a 2:1 mixture of both octanal (**45**) (31  $\mu\text{L}$ , 0.20 mmol) and organocatalyst **8** (22 mg, 0.10 mmol), each with tetrabutylammonium hexafluorophosphate (775 mg, 2.0 mmol), were prepared in acetonitrile (20 mL) in a 25 mL 3-neck flask under air. The solutions were studied by cyclic voltammetry. Since no signals beyond those corresponding to the oxidation of octanal or the organocatalyst were observed in the mixture, 2,6-lutidine•HOTf (13 mg, 0.10 mmol) was added to each of the three solutions, and they were each analyzed again by cyclic voltammetry. A new signal below +1 V was now observed in the mixture, and was assigned to enamine oxidation.

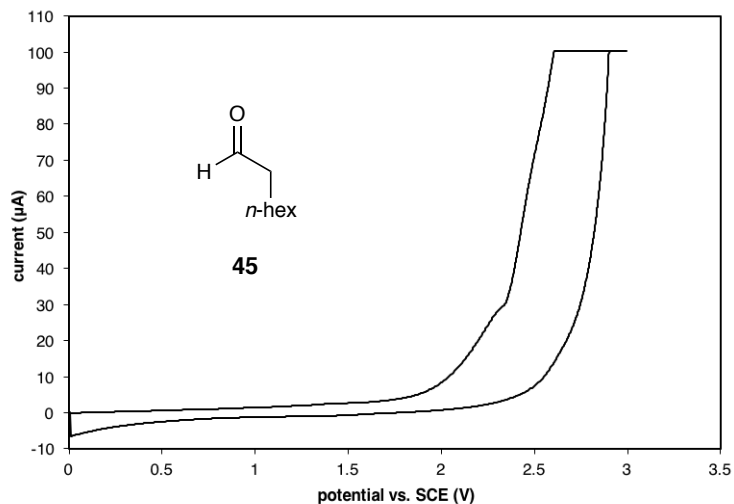

**Figure S46.** Cyclic voltammogram of octanal (**45**). Scanned from 0 V to +3.0 V to 0 V at 0.1 V/s.

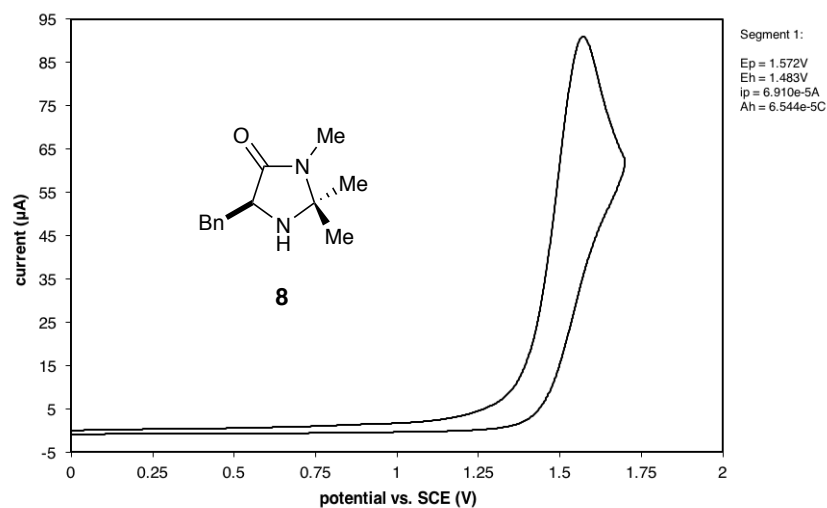

**Figure S47.** Cyclic voltammogram of organocatalyst **8**. Scanned from 0 V to +1.7 V to 0 V at 0.1 V/s.

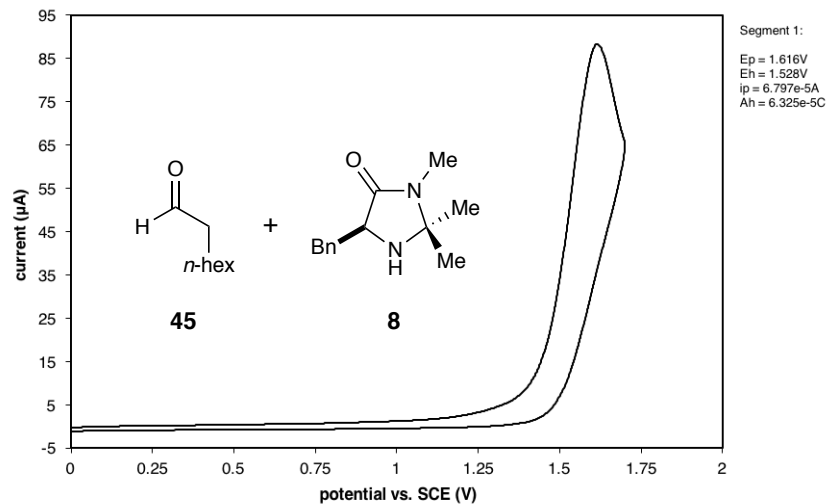

**Figure S48.** Cyclic voltammogram of a 2:1 mixture of octanal (**45**) and organocatalyst **8**. Scanned from 0 V to +1.7 V to 0 V at 0.1 V/s.

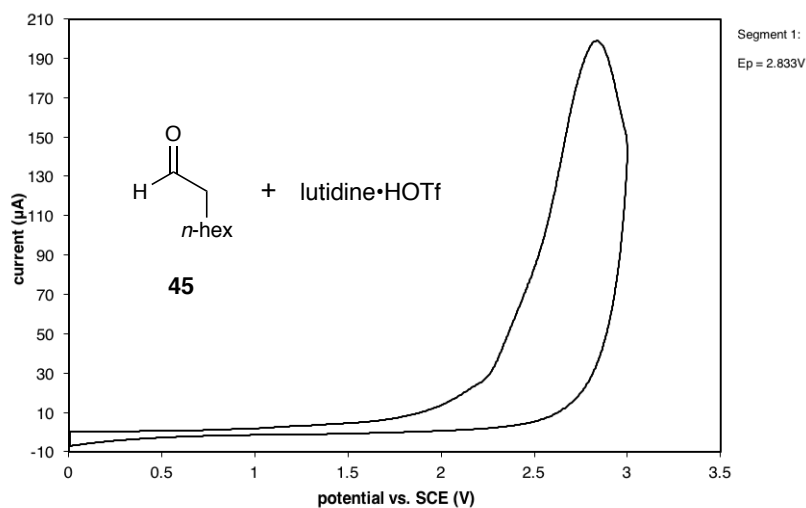

**Figure S49.** Cyclic voltammogram of a 2:1 mixture of octanal (**45**) and 2,6-lutidine•HOTf. Scanned from 0 V to +3.0 V to 0 V at 0.1 V/s.

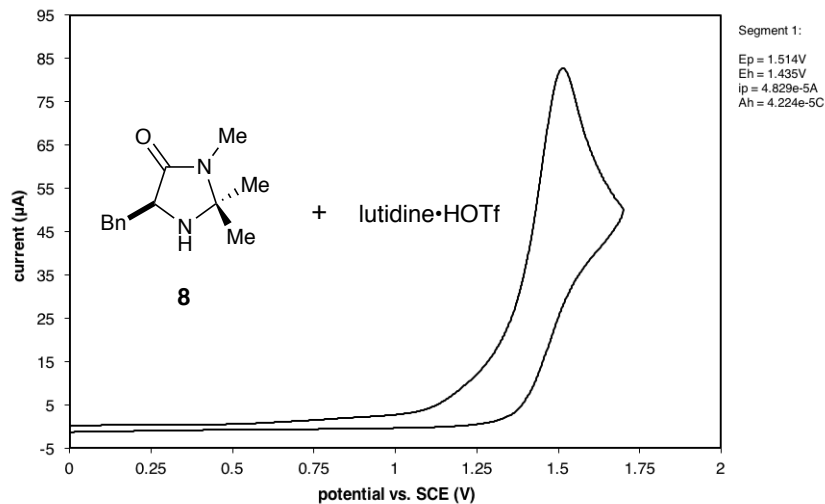

**Figure S50.** Cyclic voltammogram of a 1:1 mixture of organocatalyst **8** and 2,6-lutidine•HOTf. Scanned from 0 V to +1.7 V to 0 V at 0.1 V/s.

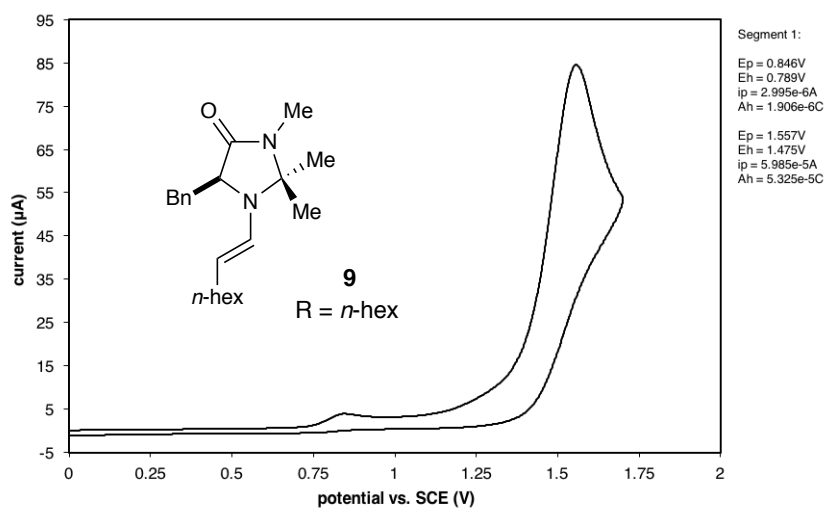

**Figure S51.** Cyclic voltammogram of a 2:1:1 mixture of octanal (**45**), organocatalyst **8**, and 2,6-lutidine•HOTf, forming enamine **9** (R = *n*-hex) . Scanned from 0 V to +1.7 V to 0 V at 0.1 V/s.

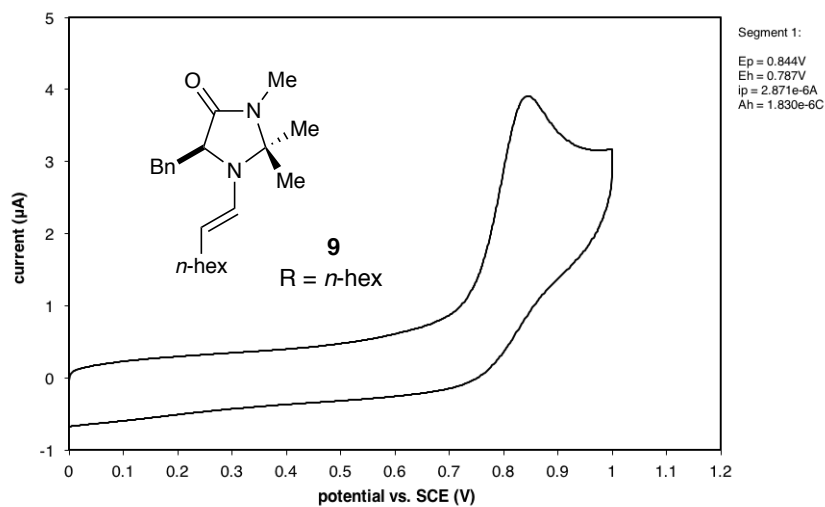

**Figure S52.** Cyclic voltammogram of a 2:1:1 mixture of octanal (**45**), organocatalyst **8**, and 2,6-lutidine•HOTf, forming enamine **9** (R = *n*-hex) . Scanned from 0 V to +1.0 V to 0 V at 0.1 V/s.

## XVI. Stern-Volmer Fluorescence Quenching Studies (Table 4)

Photocatalyst (1.2  $\mu\text{mol}$ ) was dissolved in 7.4:1 dimethylacetamide/water (5.0 mL) to prepare a 0.24 mM solution. This solution (0.95 mL) was then diluted to a volume of 46 mL by adding further 7.4:1 dimethylacetamide/water. The resulting 5.0  $\mu\text{M}$  solution (1.6 mL) was added to each of a set of 4 screw-top 1.0 cm quartz cuvettes. A stock solution of quencher (0.25 mmol) in 7.4:1 dimethylacetamide/water (5.0 mL, 50 mM in quencher) was added in increasing amounts (0, 0.40, 0.80, and 1.2 mL) to the cuvettes containing the photocatalyst solution, and the volume for each vessel was adjusted to 3.2 mL by adding the necessary amount of 7.4:1 dimethylacetamide/water (1.6, 1.2, 0.80, and 0.40 mL). The resulting mixtures were sparged with nitrogen for 15 minutes, then irradiated at 380 nm. The fluorescence emission spectra (5 trials per sample) were recorded. The ratio of the maximum fluorescence emission intensities maximum between samples without and with quencher were plotted against the quencher concentration to generate the Stern-Volmer plots below.

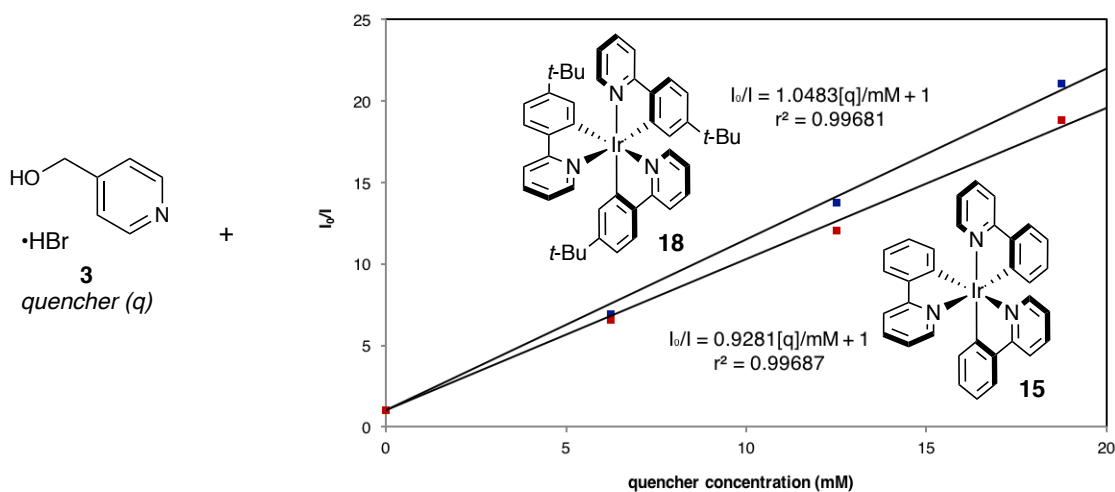

**Figure S53.** Fluorescence quenching experiments of Ir(ppy)<sub>3</sub> (**15**) and Ir[(4'-t-Bu)ppy]<sub>3</sub> (**18**) in the presence of 4-(hydroxymethyl)pyridine•HBr (**3**).

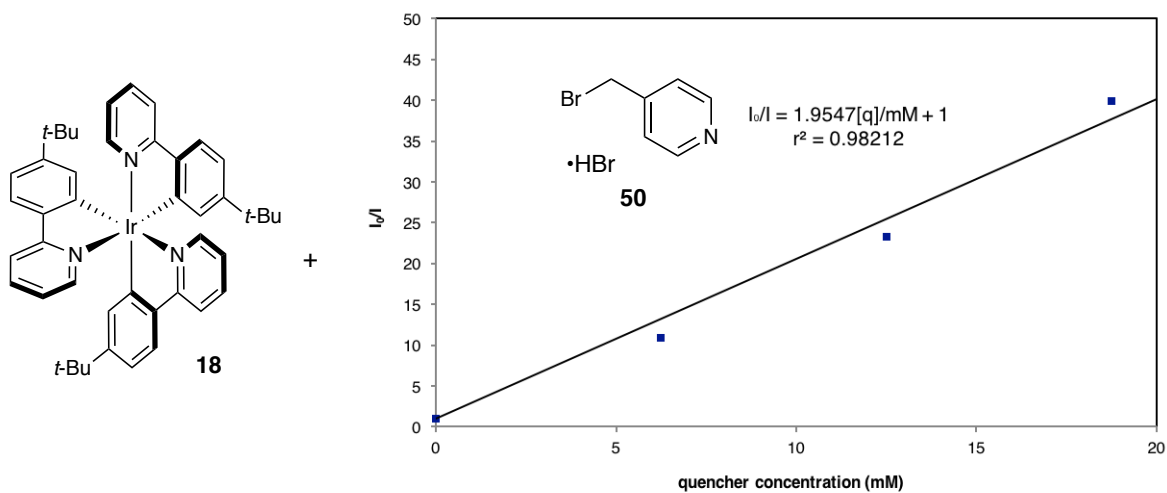

**Figure S54.** Fluorescence quenching experiments of Ir[(4'-t-Bu)ppy]<sub>3</sub> (**18**) in the presence of 4-(bromomethyl)pyridine•HBr (**50**).

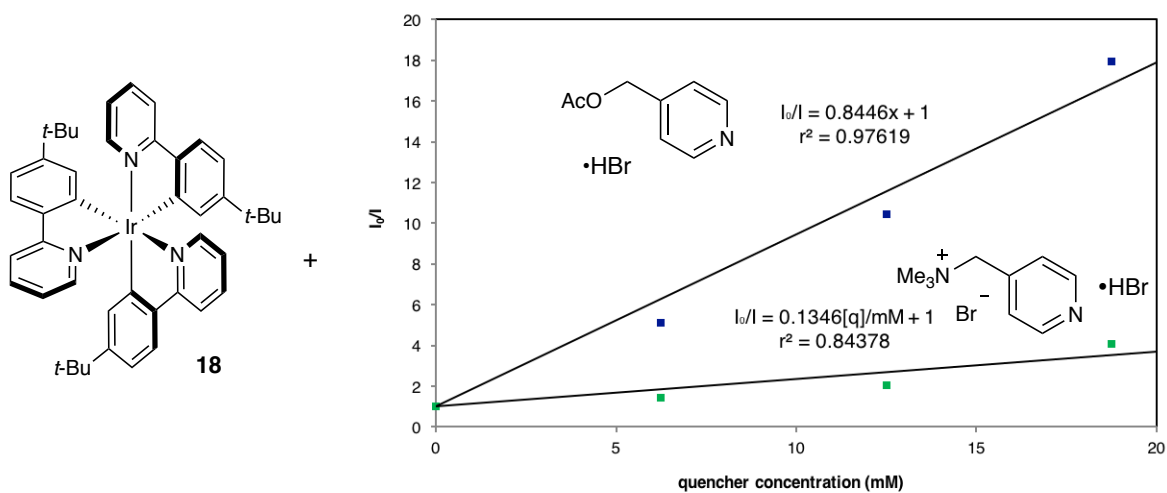

**Figure S55.** Fluorescence quenching experiments of Ir[(4'-t-Bu)ppy]<sub>3</sub> (**18**) in the presence of 4-(acetoxymethyl)pyridine•HBr and N-(pyridin-4-ylmethyl)-N,N,N-trimethylammonium bromide•HBr.

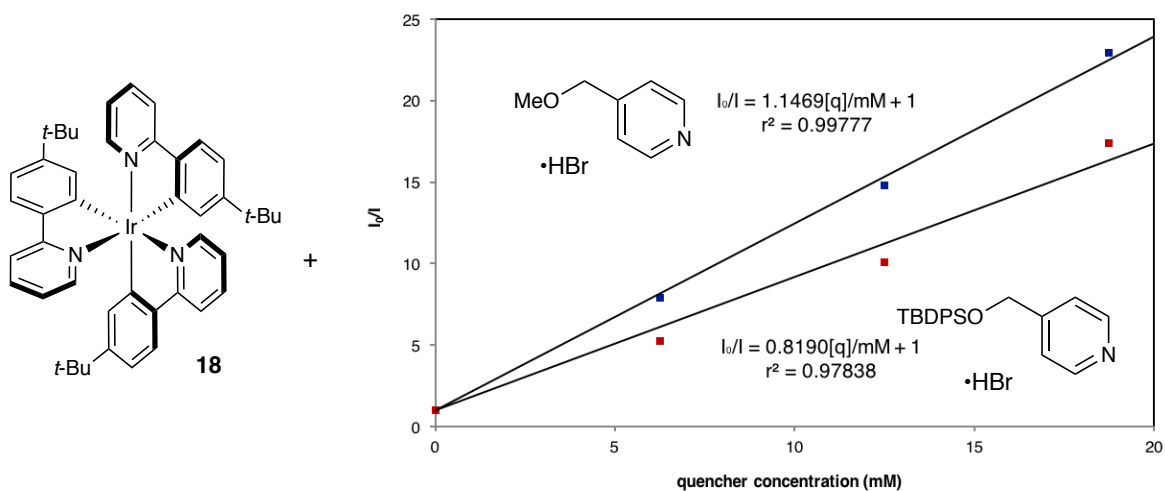

**Figure S56.** Fluorescence quenching experiments of Ir[(4'-*t*-Bu)ppy]<sub>3</sub> (**18**) in the presence of 4-(methoxymethyl)pyridine•HBr and 4-(*tert*-butyldiphenylsiloxy)methylpyridine•HBr.

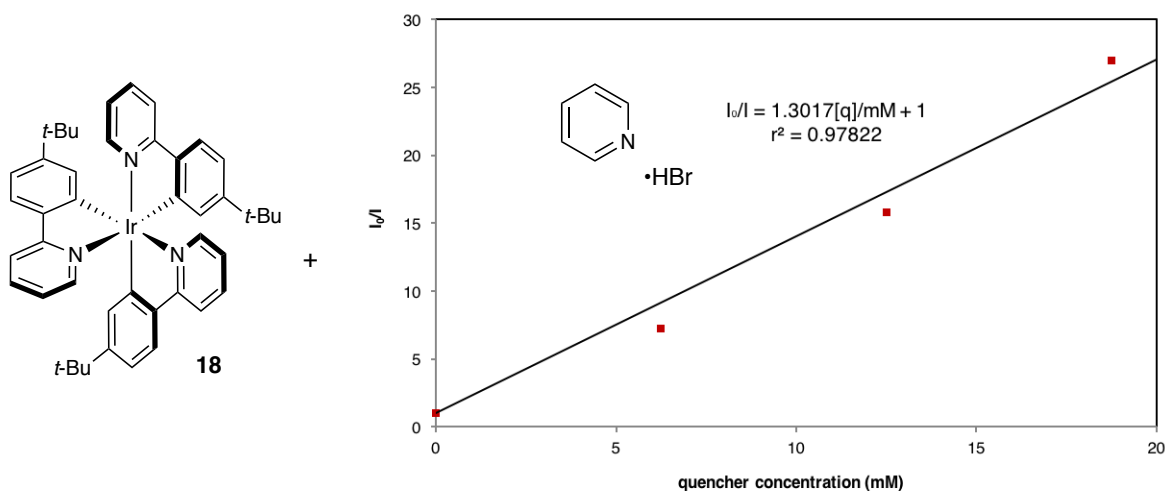

**Figure S57.** Fluorescence quenching experiments of Ir[(4'-*t*-Bu)ppy]<sub>3</sub> (**18**) in the presence of pyridine•HBr.



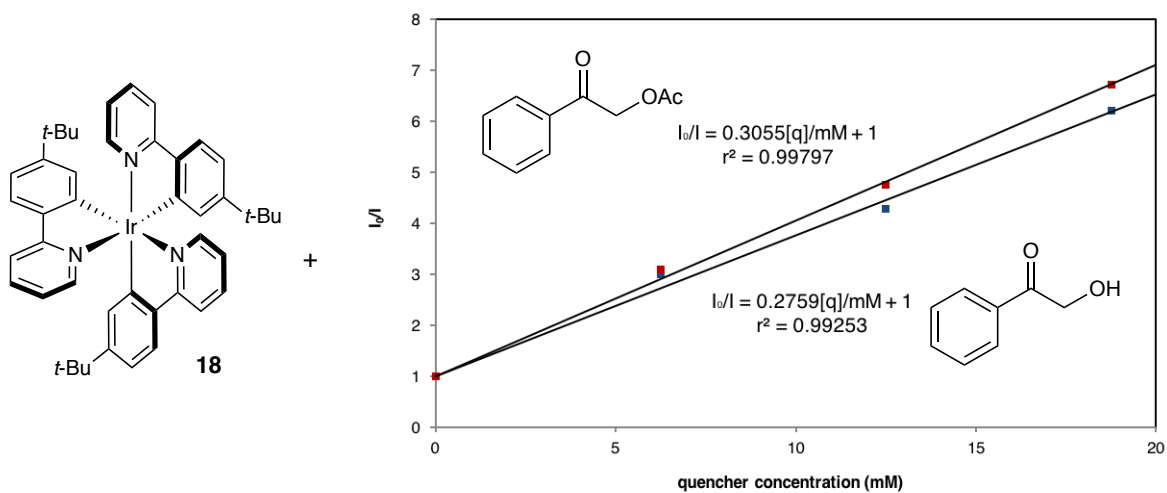

**Figure S58.** Fluorescence quenching experiments of Ir[(4'-t-Bu)ppy]<sub>3</sub> (**18**) in the presence of α-hydroxyacetophenone and α-acetoxyacetophenone.

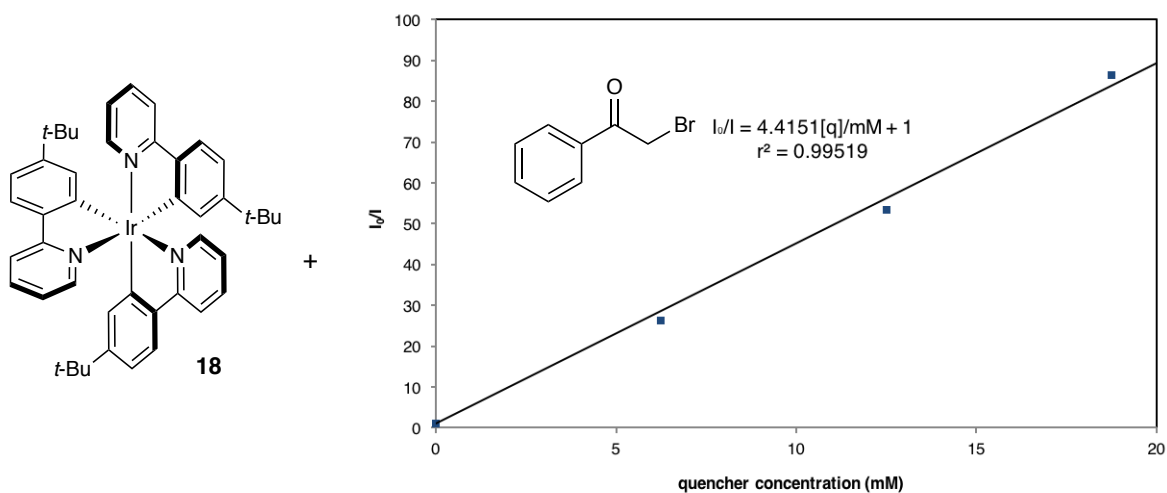

**Figure S59.** Fluorescence quenching experiments of Ir[(4'-t-Bu)ppy]<sub>3</sub> (**18**) in the presence of α-bromoacetophenone.

## XVII. Quantum Yield Determination (Figure 4)

The procedure recently described by the Knowles group<sup>35</sup> (Princeton University) based on standard chemical actinometry<sup>36</sup> was first followed to determine the photon flux of the apparatus used in these experiments. The actinometry data we obtained is presented below. For the full details of this procedure, the Knowles group's publication which describes a quantum yield measurement should be consulted.<sup>35</sup> The only minor changes we made to their procedure are listed below:

1. While the Knowles group lent us the purple LED apparatus (with an emission band tightly centered around 402 nm) used for their publication, we used a more central position in the beaker to lower the light intensity and conducted all reactions at room temperature (22 °C) by placing a fan above the beaker.
2. Potassium ferrioxalate trihydrate was purchased from Alfa Aesar and used immediately.
3. The phenanthroline developer solution was prepared on 100 mL scale, and for each actinometry experiment, a portion of this solution (3 mL) was added into four 1 cm × 1 cm quartz cuvettes wrapped in aluminum foil under nitrogen, ready for direct injection of aliquots from the irradiated ferrioxalate solution.
4. We conducted four actinometry experiments using the same reaction volume (3 mL), but removed aliquots (10 µL) before irradiation, and then at 3.0 minutes, 6.0 minutes, and 9.0 minutes. These aliquots were each added directly into a cuvette containing the developer solution, and after standing for 30 minutes, the resulting solutions were analyzed by UV-Vis absorption spectrophotometry. The absorbance of the solution at 510 nm was recorded, and the data reported are an average of two measurements, each pair of which differed by no more than 8 mau.

A typical set of UV-Vis absorbance spectra is shown below:

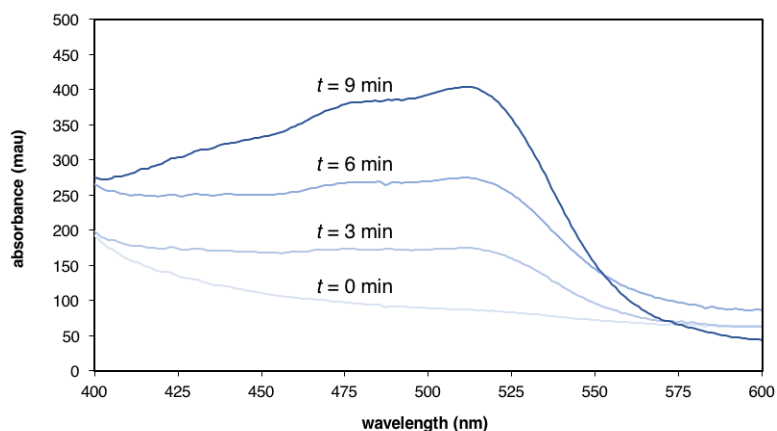

**Figure S60.** Typical UV-Vis absorption spectra for photon flux determination.

The data obtained in the actinometry experiments to determine photon flux are compiled below:

**Table S11.** UV-Vis absorbance data for determination of photon flux in quantum yield measurement.

| Trial    | Value                     | 0 min     | 3 min     | 6 min     | 9 min     |
|----------|---------------------------|-----------|-----------|-----------|-----------|
| 1        | $A_{510 \text{ nm}}$ (au) | 0.102141  | 0.211165  | 0.314650  | 0.404435  |
| 2        | $A_{510 \text{ nm}}$ (au) | 0.110730  | 0.203300  | 0.312480  | 0.420615  |
| 3        | $A_{510 \text{ nm}}$ (au) | 0.0745355 | 0.172780  | 0.288780  | 0.392955  |
| 4        | $A_{510 \text{ nm}}$ (au) | 0.0802845 | 0.161400  | 0.279550  | 0.385965  |
| 1        | $\Delta A$ (au)           | –         | 0.109024  | 0.212509  | 0.302294  |
| 2        | $\Delta A$ (au)           | –         | 0.092570  | 0.201750  | 0.309885  |
| 3        | $\Delta A$ (au)           | –         | 0.0982445 | 0.2142445 | 0.3184195 |
| 4        | $\Delta A$ (au)           | –         | 0.0811155 | 0.1992655 | 0.3056805 |
| Mean     | $\Delta A$ (au)           | –         | 0.095     | 0.207     | 0.309     |
| St. Dev. | $\Delta A$ (au)           | –         | 0.012     | 0.008     | 0.007     |

The linearity of the absorbance data over time is confirmed in the plot below:

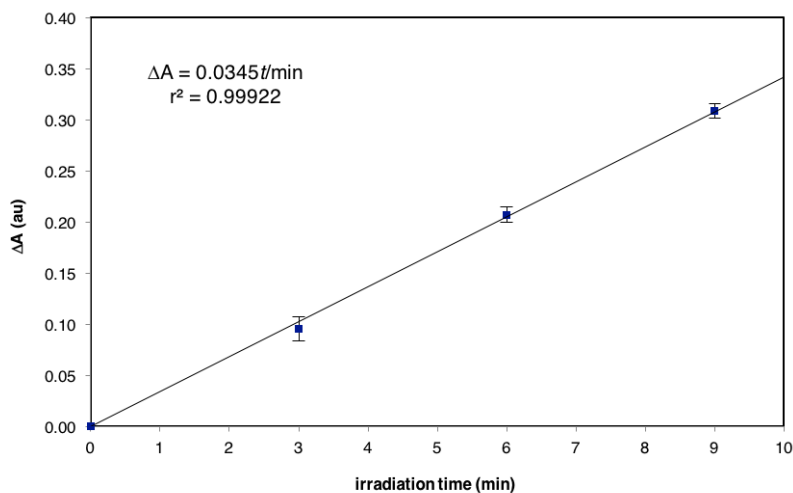

**Figure S61.** Summary of absorbance data used for photon flux determination.

The photon flux is estimated at each of the three irradiation time points from each of the four actinometry experiments to obtain twelve estimates of the photon flux according to the equation

$$\text{photon flux} = \frac{\Delta A_{510 \text{ nm}} \cdot V_1 \cdot V_3}{\epsilon_{510 \text{ nm}} \cdot l \cdot \phi_{510 \text{ nm}} \cdot t \cdot F \cdot V_2}$$

where

$\Delta A_{510 \text{ nm}}$  = change in absorbance at 510 nm between samples irradiated for  $t$  and 0 s

$\epsilon_{510 \text{ nm}}$  = extinction coefficient of the Fe(phen)<sub>3</sub> complex at 510 nm (11100 M<sup>-1</sup>·cm<sup>-1</sup>)

$l$  = path length of the cuvette (1 cm)

$\phi_{405 \text{ nm}}$  = quantum yield for ferrioxalate decomposition at 405 nm (1.14)<sup>36</sup>

$t$  = irradiation time

$F$  = fraction of light absorbed by the ferrioxalate solution at 405 nm ( $\cong 1$ )<sup>36</sup>

$V_1$  = volume of the irradiated ferrioxalate solution (3 mL)

$V_2$  = volume of the aliquot taken from the irradiated solution (10  $\mu$ L)

$V_3$  = volume of the developer solution into which the aliquot is injected (3 mL)

For the twelve measurements, the photon flux at the central position in the LED setup for 3 mL of

solution in a 1 cm × 1 cm cuvette is thus estimated as

$$\text{photon flux} = (4.0 \pm 0.3) \times 10^{-8} \text{ einstein}\cdot\text{s}^{-1}$$

where the uncertainty is the standard deviation among the twelve individual estimates.

We then performed the model reaction for this study in the 402 nm LED setup using racemic catalyst at room temperature.

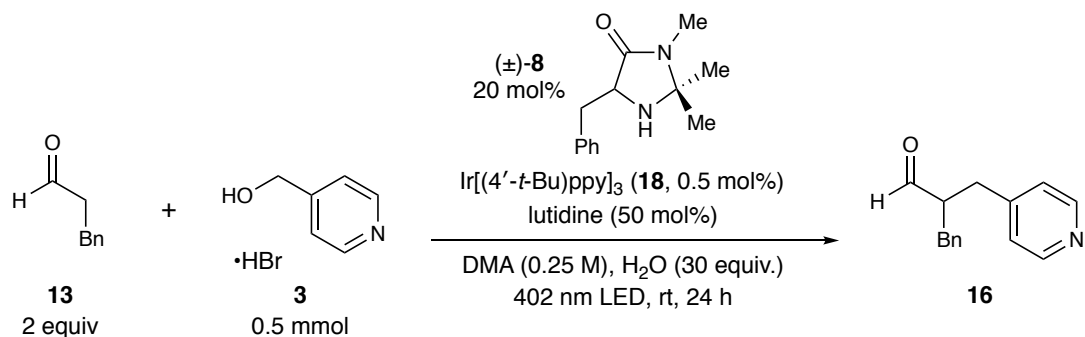

After 24 hours, an aliquot of the reaction was analyzed by  $^1\text{H}$  NMR to determine the yield of the desired aldehyde (much shorter reaction times gave correspondingly lower yields which could not be quantified with desirable precision). This procedure was conducted three times, and yields of 40.9%, 38.6%, and 38.4% were obtained. We measured the absorbance of  $\text{Ir}[(4'\text{-}t\text{-Bu})\text{ppy}]_3$  (**18**) in 7.4:1 dimethylacetamide/water (1.25 mM) at 402 nm as  $A_{402 \text{ nm}} = 2.30$ , meaning that the photocatalyst in the reaction medium absorbs  $F = 1 - 10^{-A} = 99.5\%$  of the incident light. We then estimate the quantum yield of the reaction as

$$\phi = \frac{\text{reaction yield}}{\text{photon flux} \cdot t \cdot F}$$

Using the three 24 hour yields above, and scaling the photon flux by the ratio of the volumes (and thus surface areas exposed to incident light) of this reaction to that of the actinometry experiments (2.43 mL ÷ 3.00 mL), we estimate that

$$\phi = 7.1 \pm 0.6 \%$$

where the uncertainty is the quadratic sum of independent contributions of uncertainty from the standard deviation among reaction yields ( $\pm 1.4\%$  in reaction yield, which propagates to  $\pm 0.25\%$  in quantum yield) and photon flux ( $\pm 0.3 \times 10^{-8}$  einstein $\cdot$ s $^{-1}$  in photon flux, which propagates to  $\pm 0.53\%$  in quantum yield).

Finally, we also performed the corresponding reaction with the benzylic bromide electrophile **50** as described in our group's 2010 publication, again using racemic catalyst at room temperature.

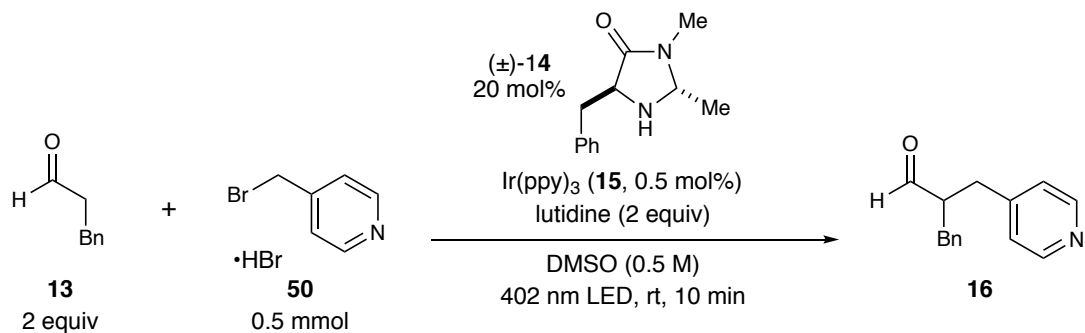

After 10 minutes, an aliquot of the reaction was analyzed by  $^1\text{H}$  NMR to determine the yield of the desired aldehyde. This procedure was conducted three times, and yields of 24.8%, 27.4%, and 26.6% were obtained. We measured the absorbance of Ir(ppy)<sub>3</sub> (**15**) in dimethylsulfoxide (2.5 mM) at 402 nm as  $A_{402\text{ nm}} = 2.59$ , meaning that the photocatalyst in the reaction medium absorbs  $F = 1 - 10^{-A} = 99.7\%$  of the incident light. Again, scaling the photon flux by the ratio of the volumes (and thus surface areas exposed to incident light) of this reaction to that of the actinometry experiments ( $1.31\text{ mL} \div 3.00\text{ mL}$ ), we estimate the quantum yield of the reaction as

$$\phi = 1260 \pm 110 \%$$

where the uncertainty is the quadratic sum of independent contributions of uncertainty from the standard deviation among reaction yields ( $\pm 1.3\%$  in reaction yield, which propagates to  $\pm 64\%$  in quantum yield) and photon flux ( $\pm 0.3 \times 10^{-8}$  einstein $\cdot$ s $^{-1}$  in photon flux, which propagates to  $\pm 95\%$  in quantum yield).

## XVIII. Determination of Stereochemical Outcome

### A. Benzylation with Alcohol Electrophiles

#### This work

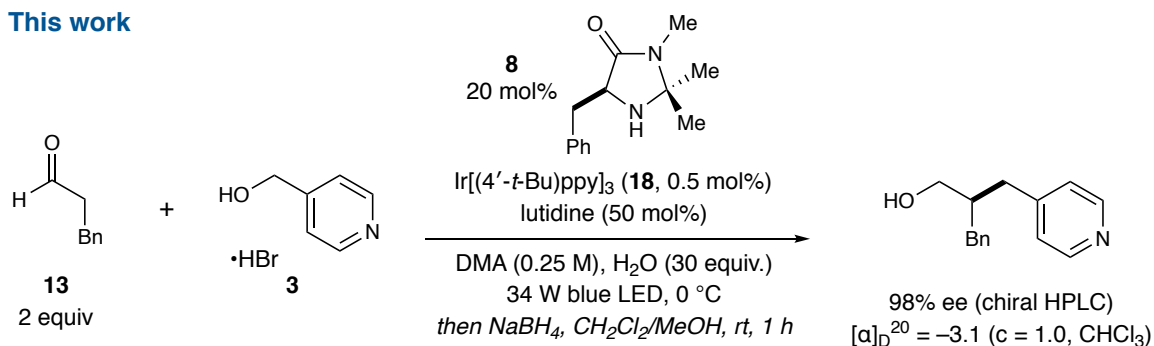

#### Shih *et al.*, 2010<sup>1</sup>

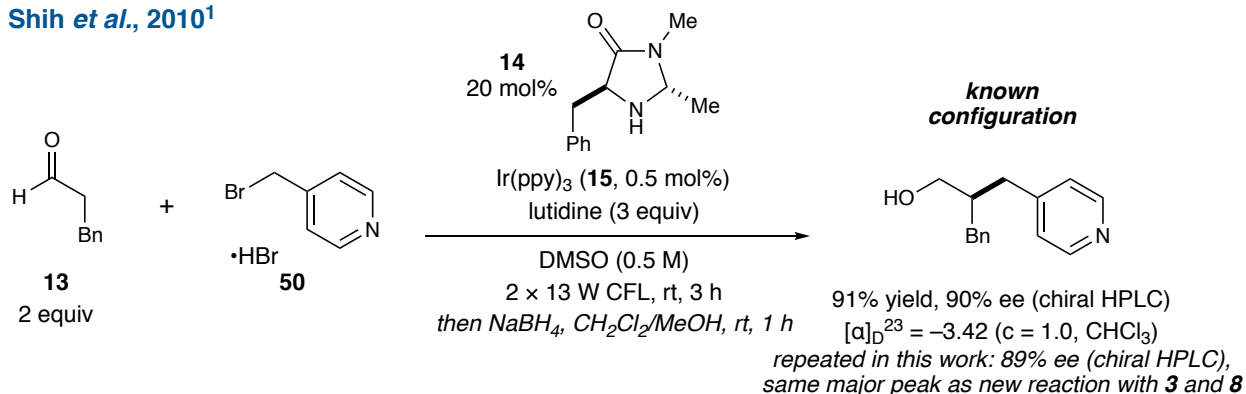

As described earlier, optimized reaction conditions for the enantioselective  $\alpha$ -benzylation of aldehyde **13** with alcohol **3**, followed by reduction of the crude aldehyde, gave the corresponding alcohol in 98% ee as determined by chiral HPLC. The magnitude and direction of its optical rotation were consistent with data for the same compound as reported by our group in 2010,<sup>1</sup> but given its small absolute value, we could not definitively rule out errors in producing this result. Therefore, we repeated the optimized procedure for  $\alpha$ -benzylation with benzylic bromides using electrophile **50** as shown.<sup>1</sup> Following reduction, we obtained the alcohol in 89% ee as determined by the same chiral HPLC assay as for the previous experiment. The major and minor enantiomers eluted in the same order in both the new reaction, using alcohol **3**, and the previously developed reaction, using bromide **50**,<sup>1</sup> demonstrating that both procedures preferentially give the same enantiomer. Other benzylation products were assigned by analogy.

## B. Alkylation with Acetate Electrophiles

### This work

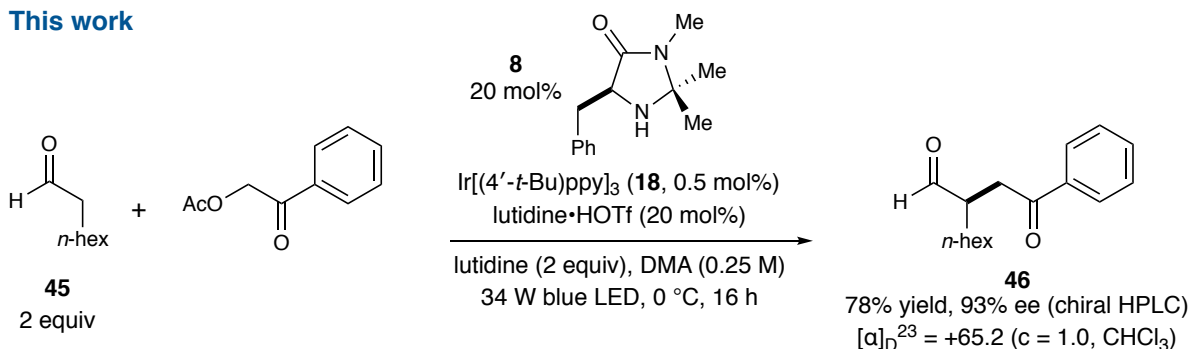

### Nicewicz & MacMillan, 2008<sup>2</sup>

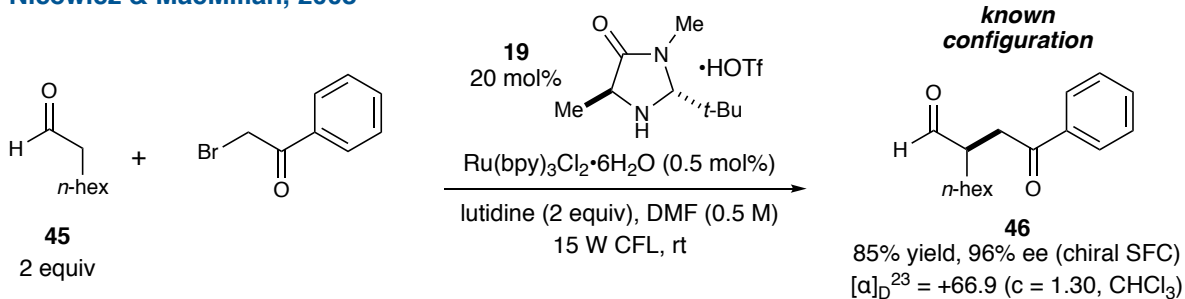

As described earlier, optimized reaction conditions for the enantioselective  $\alpha$ -alkylation of aldehyde **45** with  $\alpha$ -acetoxyacetophenone gave the alkylated aldehyde in 93% ee as determined by chiral HPLC. The magnitude and direction of its optical rotation were consistent with data for the same compound as reported by our group in 2008,<sup>2</sup> and given its appreciable absolute value, we concluded that both procedures preferentially give the same enantiomer. Other alkylation products were assigned by analogy.



## XIX. Further Discussion of Table 4

### A. Weakly Basic Leaving Groups

#### Relevant elementary steps for entry 1 (X = OAc)

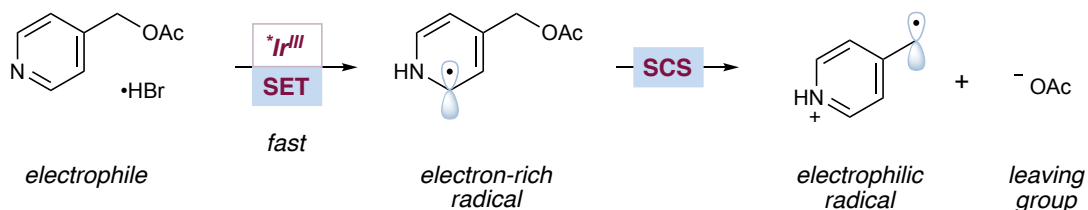

feasible:  $\text{pK}_a(\text{AcOH}) = 4.76$

#### Relevant elementary steps for entry 2 (X = $\text{NMe}_3^+\text{Br}^-$ )

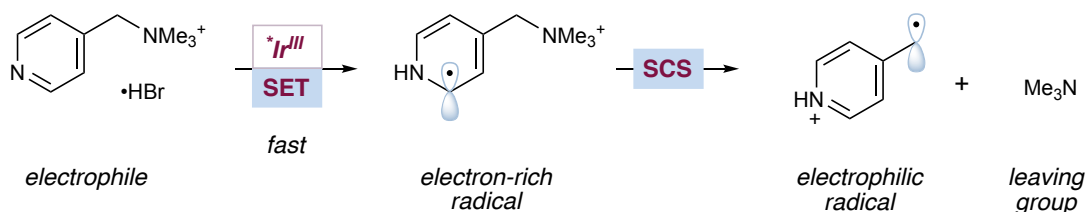

feasible:  $\text{pK}_a(\text{Me}_3\text{NH}^+) = 9.80$

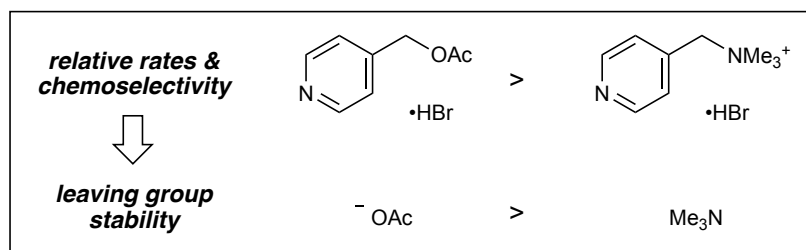

As discussed in the manuscript, the electrophiles in Table 4 with weakly basic leaving groups (entries 1–2, X = OAc,  $\text{NMe}_3^+$ ) react fastest and with the highest chemoselectivities. After reduction of the pyridinium ring by the excited state  $^*\text{Ir}^{\text{III}}$  photocatalyst, SCS can occur directly, with C–X bond scission expelling either an  $\text{AcO}^-$  anion or a neutral  $\text{Me}_3\text{N}$  molecule that are stable in the pyridine/pyridinium-type buffer of the reaction. Within this first class, the acetate substrate reacts more rapidly than the ammonium substrate because the acidities of the parent acids of the respective leaving groups ( $\text{AcOH}$ ,  $\text{pK}_a = 4.76$ ;  $^{37}$   $\text{Me}_3\text{NH}^+$ ,  $\text{pK}_a = 9.80$   $^{38}$  in  $\text{H}_2\text{O}$ ) dictate that the acetate leaving group is more stable as its conjugate base than  $\text{Me}_3\text{N}$ .

## B. Strongly Basic Leaving Groups

Relevant elementary steps for entries 3–5 (X = OH, OMe, OTBDPS)

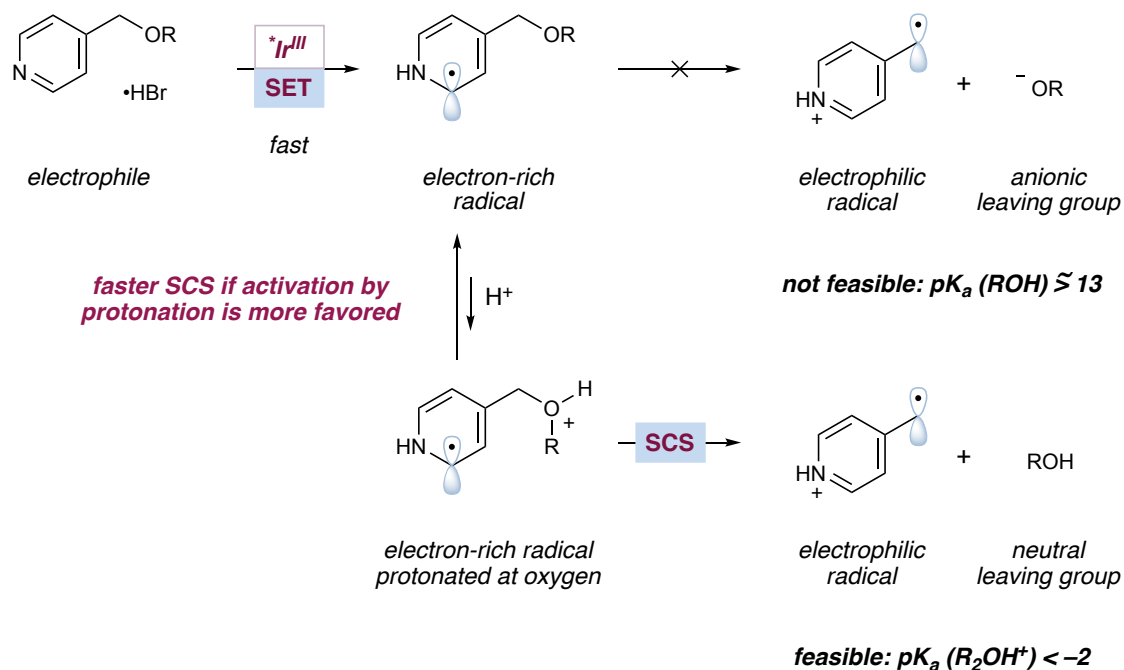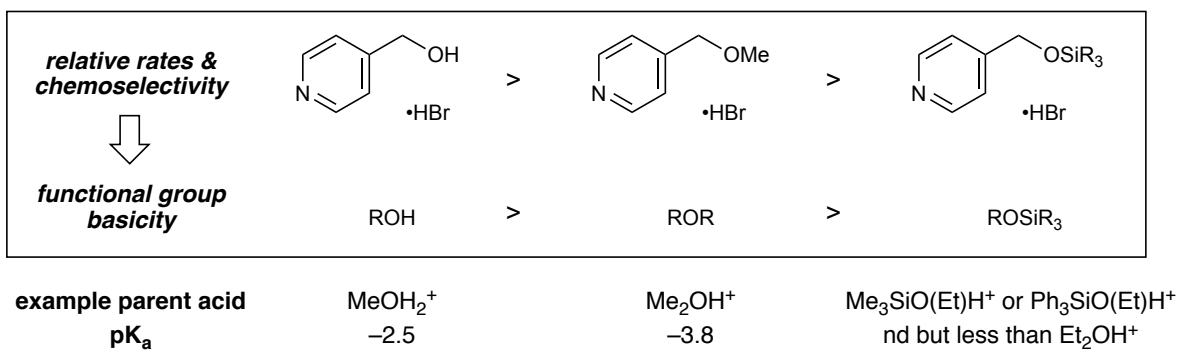

For the slower and less chemoselective electrophiles (entries 3–5, X = OH, OMe, OTBDPS), the leaving group cannot be expelled by SCS directly following reduction of the pyridinium ring because the anions are too basic to exist in the reaction medium (for the parent acids, H<sub>2</sub>O, pK<sub>a</sub> = 15.7;<sup>39</sup> MeOH, pK<sub>a</sub> = 15.2;<sup>39</sup> data not available for Ph<sub>2</sub>t-BuSiOH but for Et<sub>3</sub>SiOH, pK<sub>a</sub> = 13.6<sup>40</sup> in H<sub>2</sub>O). We propose, therefore, that the leaving groups must become protonated to some extent prior to SCS. Within this class, reactivity (X = OH > X = OMe > X = OTBDPS) trends with the basicity of the functional group which must be protonated prior to SCS (treating the (4-pyridyl)methyl

radical fragment as an alkyl group, the basicity trend of the relevant neutral entities is  $\text{ROH} > \text{ROR}' > \text{ROSiR}'_3$ , as acidity data for representative parent acids follows the order  $\text{MeOH}_2^+$ ,  $\text{pK}_a = -2.5^{41} > \text{Me}_2\text{OH}^+$ ,  $\text{pK}_a = -3.8^{41} > \text{protonated silyl alkyl ether in H}_2\text{O}$ , the latter relationship generalized from the observation that  $\text{Me}_3\text{SiOEt}$  and  $\text{Ph}_3\text{SiOEt}$  both weaken the O–H bond in phenol to a lesser extent than does  $\text{Et}_2\text{O}^{42}$ ). This correlation between reactivity and basicity suggests that in these cases, a greater degree of activation immediately preceding SCS accelerates the overall reaction. It also explains why in contrast to the weakly basic leaving groups (which are increasingly reactive as the leaving group becomes less basic), the opposite is true for this class of strongly basic leaving groups. Here, greater basicity improves reactivity, and although this basicity relates to the parent acids of the *alkylated* leaving group (i.e., prior to SCS) instead of the parent acid of the leaving group itself,  $\text{pK}_a$  values often follow the same trend for analogues of these two groups (meaning that as R varies, the basicities of RO–alkyl, represented by the  $\text{pK}_a$  values of  $\text{H(R)O–alkyl}^+$ , often follow the same order as the basicities of  $\text{RO}^-$ , represented by the  $\text{pK}_a$  values of ROH, since greater stabilization of oxonium cations and increasing basicity in the former case usually involves similar stereoelectronic effects as the destabilization of alkoxide anions and increasing basicity in the latter case, even though these chemical properties are distinct).

To illustrate this generalization, the methyl ether substrate reacts more rapidly than the TBDPS ether substrate. Although  $\text{MeO}^-$  is more basic than  $\text{TBDPSO}^-$  (which, in the first class of leaving groups, would be expected to lead to lower reactivity for the methyl ether), the (4-pyridyl)methyl methyl ether that must become protonated to enable the SCS event and ultimately expel MeOH is more basic, and thus more activated towards the desired reaction, than the corresponding (4-pyridyl)methyl TBDPS ether that must become protonated before expelling TBDPSOH. Furthermore, while the relevant comparison in this case is that the neutral molecule ROME (R = (4-pyridyl)methyl) is more basic than ROTBDPS, similar stereoelectronic effects also explain why  $\text{MeO}^-$  is more basic than  $\text{TBDPSO}^-$ . Table 4 only presents acidity data relating to the anions to simplify comparisons among all electrophiles examined, but for completeness in discussing the strongly basic leaving groups, this section provides data for the relevant neutral intermediates and their cationic parent acids.

## XX. Effect of Alcohol Electrophile Aromatic Structure on Reactivity

**Table S12.** Impact of substitution of the 4-(hydroxymethyl)pyridine electrophile on reactivity.

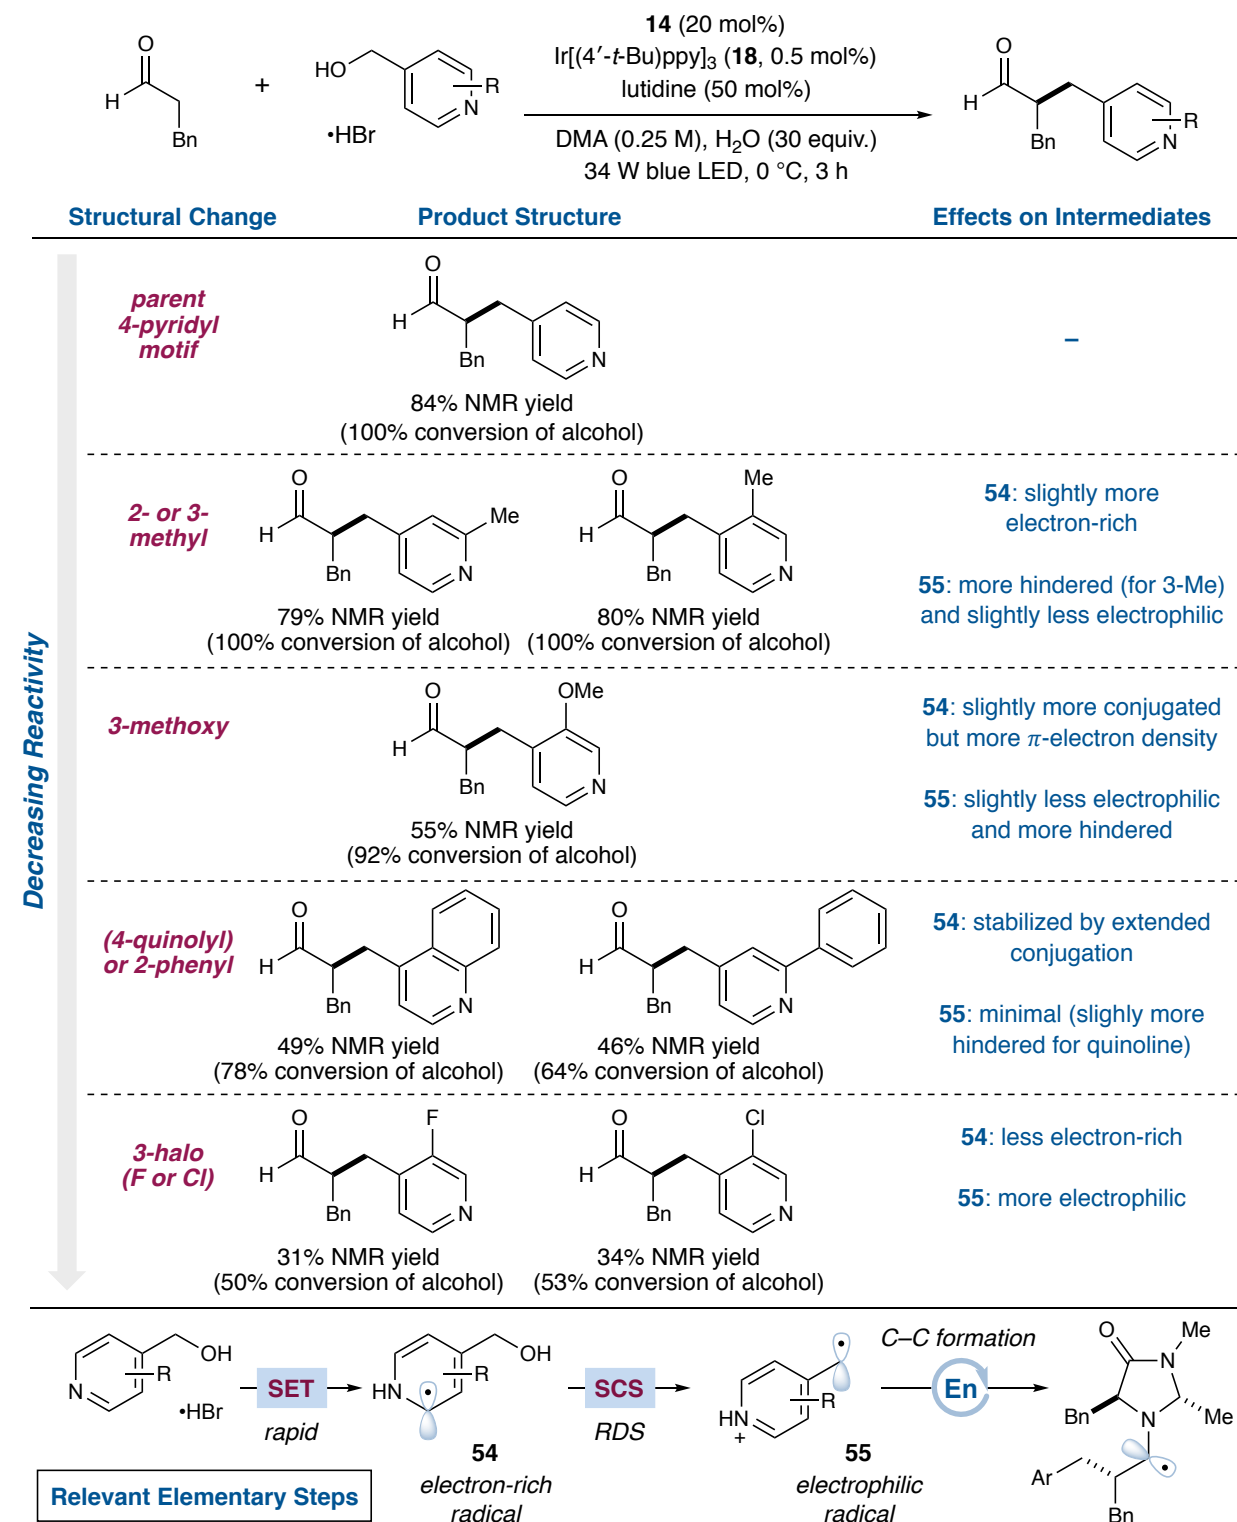

As described in the manuscript, the elementary steps shown in Scheme 1 constitute a plausible mechanism. Consistent with the data in Table 4, single-electron reduction of the electrophile by the excited state  $^*Ir^{III}$  photocatalyst is rapid. Considering the simplified linear reaction between the resulting electron-rich radical (e.g., **4** or **54**) and enamine **9**, either SCS or C–C bond formation then likely represent the rate-determining step (RDS). The kinetics of the organocatalytic cycle can clearly also impact the rate of the overall dual catalytic process. Since this section does not vary the structure or loading of either organocatalyst or the aldehyde, it does not effectively evaluate the impact of the organocatalytic cycle (this portion of the mechanism is considered in the following section). Nonetheless, we find it instructive to evaluate whether SCS or C–C bond formation is slower both in explaining the results obtained in this manuscript and potentially in the design of new reactions based on SCS.

Further discussion of Table 4 within the manuscript and the preceding section of the SI describe the precise impact of the leaving group structure in a series of (4-pyridyl)methyl electrophiles on reactivity. While this relationship is consistent with SCS as the RDS of the simplified linear reaction between the electrophile and enamine, it does not address the possibility that C–C bond formation is the RDS since all of these electrophiles would involve the same transition state in this elementary step.

To deconvolute the potential impacts of SCS and C–C bond formation on the overall rate of reaction, a preliminary set of data showing the impact of substituents about the heteroaromatic core of the 4-(hydroxymethyl)pyridine electrophile on reactivity is shown in Table S12. The only deviation from optimal reaction conditions (General Procedure A) are the use of organocatalyst **14** instead of **8** (the primary difference is that **14** is less stereoselective and slightly faster, though product enantiopurity was not obtained for these experiments) and that conversion data was recorded after 3 hours on 0.1 mmol scale in order to obtain a concise set of data that reflect the relative reactivities of these electrophiles.

First, the model reaction between hydrocinnamaldehyde and 4-(hydroxymethyl)pyridine was complete within 3 hours and provided the corresponding  $\alpha$ -benzyl aldehyde in 84% yield (determined by  $^1H$  NMR). A series of 7 further electrophiles featuring 4 general types of structural

changes from the parent compound are then sorted by decreasing reactivity. The expected effects of these structural variations on intermediates **54** and **55** (Table S12, bottom) are also summarized.

Overall, the parent 4-(hydroxymethyl)pyridine electrophile reacts at a comparable rate to its 2- and 3-methyl analogues. The 3-methoxy derivative is slightly slower and somewhat lower-yielding, followed by the 4-(hydroxymethyl)quinoline and 2-phenyl variants, and finally the 3-halogenated structures.

If SCS were the RDS, we would expect the stability of **54** to dictate overall reaction rate, with destabilization leading to rate acceleration and vice versa. The minimal impact of alkyl substitution at the 2- or the 3-positions on reactivity is consistent with this scenario. We would expect these structural changes to make **54** only slightly more electron-rich, as alkyl groups are primarily electron-donating by inductive effects, whereas the reactive unpaired electron involved in the SCS event is located in the  $\pi$ -system. The 3-methoxy substituent extends the conjugation of the electron-rich  $\pi$ -system, although we would expect the electron-donating character of this group to destabilize **54**, meaning this less reactive electrophile is not perfectly consistent with SCS as the RDS. The expansion of the electrophile's aromatic system to a quinoline motif or by 2-phenyl substitution, however, provides more convincing evidence that SCS is rate-limiting, since these changes should significantly stabilize **54** by extending  $\pi$ -conjugation. Indeed, these reactions are unambiguously slower compared to the parent electrophile. Finally, the 3-fluoro and 3-chloro substituents do not offer much additional  $\pi$ -conjugation to **54**, but they are expected to significantly stabilize the lone pair of electrons formally located on the pyridine nitrogen atom. This effect should slow SCS, and, consistent with this event as the RDS, also slow the reaction. We assume throughout these cases that the potential impact of these substituents on the basicity of the alcohol following single-electron reduction but prior to SCS (which could also affect reactivity, as shown in the preceding section of the SI) is minimized by the saturated methylene unit between the aromatic system and the alcoholic oxygen atom.

If C–C bond formation were the RDS, the effects of structural changes to **55** should dictate changes in reactivity. Alkyl substitution should not greatly affect the electrophilicity of **55** from an electronic standpoint since methyl groups should not significantly impact the electron-deficient

benzylic radical conjugated to the  $\pi$ -system. The 3-methyl analogue, however, is the most hindered electrophile in Table S12. If steric interactions were important for the reaction rate, a scenario only likely if C–C bond formation is rate-determining, this derivative would be the most impacted by such an effect. No diminution in rate is observed, however. We also would expect a slight decrease in the electrophilicity of **55** when a 3-methoxy substituent is incorporated both on electronic and steric grounds, and a modest decrease in reactivity is observed. As for the discussion of **54**, however, the quinoline-derived electrophile and the 2-phenyl, 3-fluoro, and 3-chloro derivatives provide the most definitive evidence. While all of these substituents (except for 2-phenyl) should modestly increase the steric demand of **55**, we know from the minimal impact of the 3-methyl group that steric effects do not significantly affect the overall reaction rate. Their electronic effects should be more greatly pronounced. Simple extensions of  $\pi$ -conjugation are typically approximated as electron-withdrawing, although they could also assist in stabilizing highly electron-deficient benzylic radicals. The 3-halogen substituted derivatives are the most notable cases, however, since we would expect these versions of **55** to be the most electrophilic from an electronic standpoint. Since they represent the most sluggish examples, it is unlikely that C–C bond formation is the RDS.

On balance, these data are more consistent with SCS being slower than C–C bond formation. Most importantly, (1) the extended conjugated  $\pi$ -systems in the 2-phenyl substituted and quinoline-based electrophiles lead to slower reactions, which is best explained by their stabilization of **54**, which should slow SCS (but would likely impact electrophilicity of **55** more modestly), and (2) the 3-fluoro and 3-chloro electrophiles react much more slowly, which is best explained by electronic stabilization of **54** and a correspondingly slower SCS, whereas the expected effect on C–C bond formation would be acceleration due to increased electrophilicity of **55**.

## XXI. Preliminary Kinetic Studies to Evaluate Organocatalytic Cycle

A series of model reactions was performed in a manner analogous to the optimization experiments described in Section III (preparing a stock solution for materials needed in all experiments, then adding the variable component to each vial as needed). They were conducted on 0.25 mmol scale of limiting reagent (**3•HBr**) under optimized conditions (see Section IV), except for the indicated changes. Reaction progress was monitored by removing aliquots at the indicated times and analyzed by <sup>1</sup>H NMR.

As discussed in the manuscript, the data shown in Figure 4 and the alcohol structure-activity relationship described in the preceding section of the SI suggest that in the linear reaction between the electrophile and enamine (i.e., neglecting the organocatalytic cycle, which is essentially unchanged across these above-mentioned experiments), spin-center shift is the rate-determining step. Kinetic experiments in this section are consistent with this hypothesis, as initial rates (Figure S62) are independent of the concentrations of enamine components (aldehyde and organocatalyst). Beyond this short initial window (5–10% conversion), however, reaction rate increases with higher aldehyde and enamine concentrations. This dependence does not appear in the initial rates since an equilibrium amount (~ 5 mol%, see Figure S65) of enamine **9** is pre-formed under our procedure before irradiation (Figure S64 demonstrates this effect), and a photoredox-mediated, SCS-limited reaction between the electrophile and this initially available quantity of enamine is observed. After this period, the kinetics of the organocatalytic cycle become observable, as the enamine must be replenished from its aldehyde and imidazolidinone components and, ultimately, the organocatalyst must be turned over by hydrolysis of the product iminium ion. Experiments in this section also suggest that hydrolysis of the product iminium ion is turnover-limiting (Figures S63 and S65). Each of these experiments is discussed in further detail below.



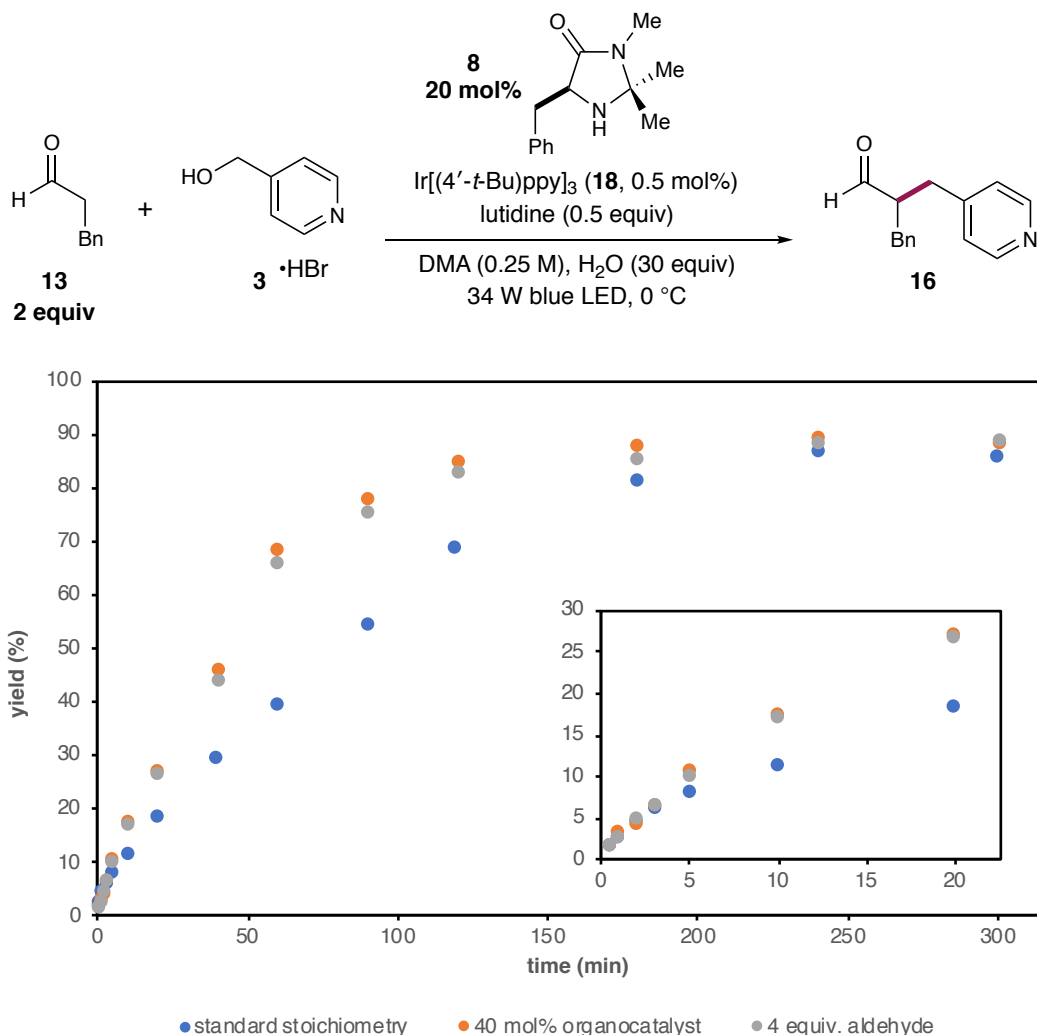

**Figure S62.** Effect of aldehyde and organocatalyst stoichiometry on reaction profile.

Figure S62 demonstrates that (a) initial rates are independent of enamine concentration (see inset), and (b) after this initial regime, a positive relationship exists between rate and the concentrations of enamine components. It seems notable that this initial period ends approximately when the equilibrium amount of enamine **9** that should be in solution prior to irradiation under standard reactions conditions (see Figure S65, 30 equiv water) would be consumed. Thereafter, the kinetics of enamine formation from the aldehyde and organocatalyst, as well as the turnover of the organocatalyst, become important. Descriptions of SCS representing the RDS in the direct reaction between the electrophile and enamine (i.e., in the manuscript and prior sections of the SI) also become less meaningful. We believe nonetheless that the demonstration that SCS is slower than other events such as C–C bond formation in the linear process (neglecting the organocatalytic

cycle) is helpful in understanding this reaction and could be important for future reaction development.

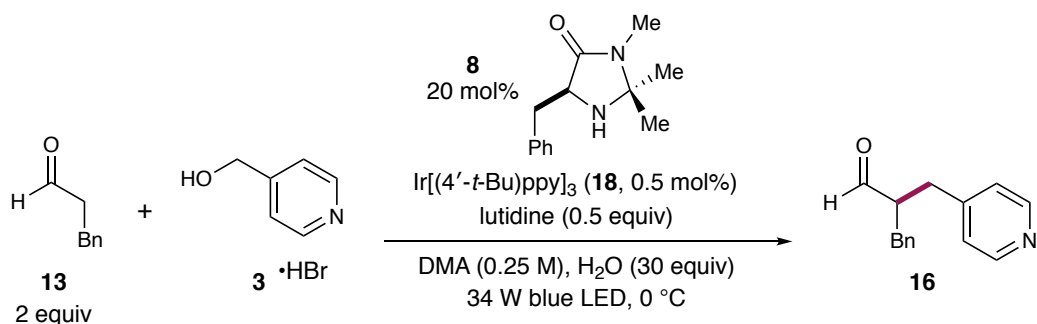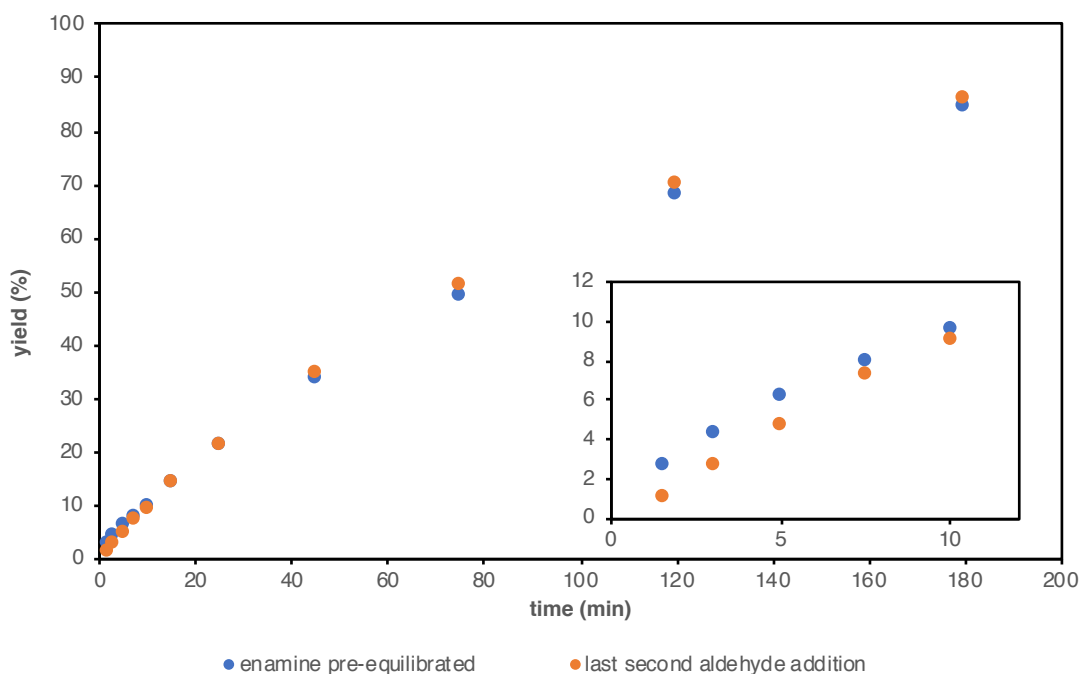

**Figure S63.** Effect of enamine pre-equilibration before irradiation on reaction profile.

Figure S63 examines whether the standard procedure, which involves sparging the reaction mixture prior to irradiation and thus allows for an appreciable equilibrium amount of enamine to be available at the outset, causes an initial increase in rate compared to the remainder of the process. Indeed, when the standard procedure (blue circles) was modified such that independently degassed aldehyde was added to a sparged solution of the other components immediately before irradiation (orange circles), the initial rate of the modified reaction was measurably lower. This difference in initial rates is consistent with a pre-formed concentration of enamine under standard

conditions enabling the rapid initial kinetic regime described earlier in this section, whereas under modified conditions, the kinetics of the organocatalytic cycle cannot be neglected for any portion of the process. Importantly, this discrepancy becomes negligible at later time points, as small differences in initial concentrations between equilibrating species become unimportant.

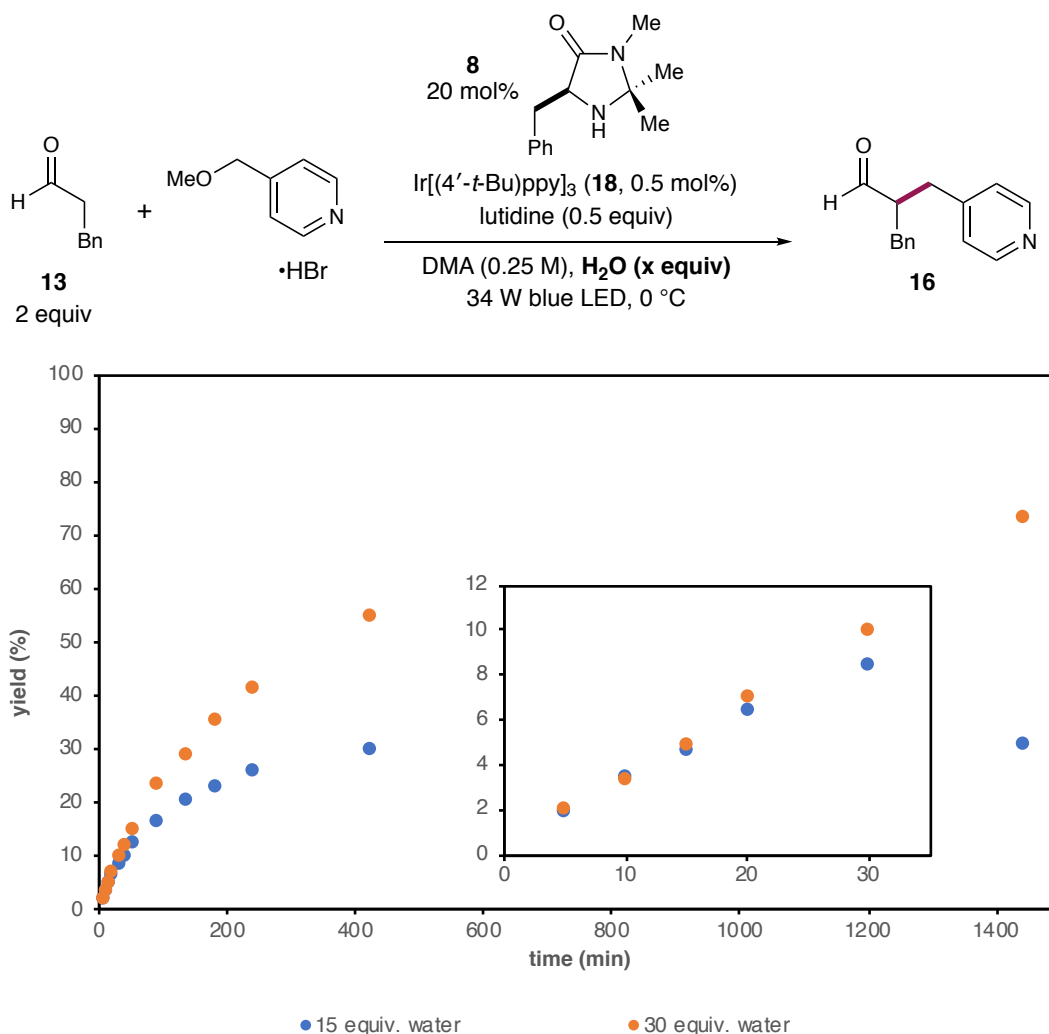

**Figure S64.** Effect of water content on reaction profile.

Figure S64 demonstrates a positive relationship between the water content of the reaction medium and the rate of reaction. The methyl ether analogue of the standard alcohol electrophile was employed to minimize the potential impact of water on hydrogen-bonding that could affect the ejection of the leaving group by spin-center shift. Higher amounts of water were not used since the photocatalyst is not completely soluble under such conditions. Consistent with earlier

experiments described in this section, this effect is not detected initially, as similar quantities of enamine are available as irradiation begins and organocatalyst turnover is unimportant. After this initial period, the kinetics of the organocatalytic cycle affect the rate of reaction (see also the discussion of Figure S62), which suggests that water is involved in the turnover-limiting step of the organocatalytic cycle. The most likely scenario is that hydrolysis of the product iminium ion is turnover-limiting, although the following experiment was also performed to rule out the possibility that this kinetic dependence on water is associated with enamine formation.

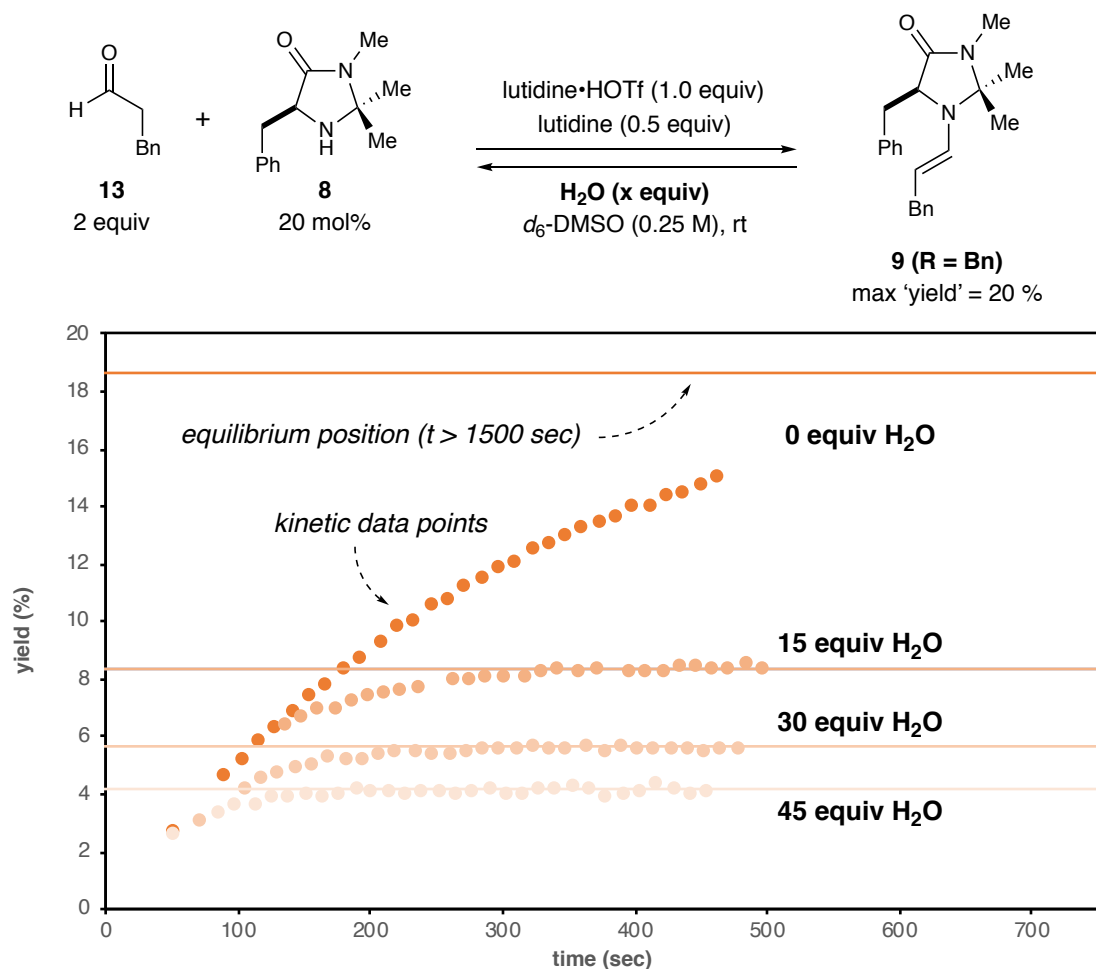

**Figure S65.** Effect of water content on enamine formation.

Data for Figure S65 were generated by adding an equal volume of a solution of aldehyde **13** (1 M) in  $d_6$ -DMSO to a solution of organocatalyst **8** (0.1 M), 2,6-lutidine (0.25 M), lutidinium triflate

(0.5 M), and the indicated amount of water in an NMR tube. This procedure gives final concentrations of all components representative of the standard reaction conditions, except that photocatalyst was omitted and the lutidinium salt was used instead of the electrophile to simplify the NMR spectrum without significantly altering the acid-base character of the solution. The resulting mixture was monitored by  $^1\text{H}$  NMR using single-scan experiments at 12 second intervals for  $\sim 7$  minutes following complete mixing of the solutions, as well as  $\sim 30$  and 60 minutes thereafter to determine the equilibrium composition of the mixture. For convenience, these experiments were performed at ambient temperature in DMSO, which also depart from the optimized reaction conditions ( $0\text{ }^\circ\text{C}$  in DMA). Nonetheless, we expect the results to be a fair approximation of reaction conditions, since DMSO is nearly as effective as DMA and does not cause obvious changes in kinetic behavior, with the caveat that the approach to equilibrium should be slower in all cases.

Due to the stoichiometries employed (large excesses of aldehyde and water), this system can be approximated as a pseudo first-order approach to equilibrium between organocatalyst **8** and enamine **9**, where the apparent pseudo first-order rate constant for the difference between actual and equilibrium concentrations of either species is

$$k_{\text{obs}} = k_1 + k_{-1},$$

and where  $k_1$  and  $k_{-1}$  are the pseudo first-order rate constants for the formation and hydrolysis of enamine **9**, respectively. We did not analyze the case without added water since  $\text{H}_2\text{O}$  concentration must also be considered here (complicating analysis), and since the enantioselective benzylation reaction performs very poorly without this cosolvent. Good exponential fits were obtained for early time points in the three approaches to equilibrium considered, allowing for estimates of  $k_{\text{obs}}$ . The individual pseudo first-order rate constants were obtained by solving the system of equations represented by the above expression for  $k_{\text{obs}}$  and

$$K_{\text{eq}} = \frac{k_1 \cdot [\text{H}_2\text{O}]}{k_{-1} \cdot [\mathbf{8}]},$$

already having obtained values for  $K_{\text{eq}}$  by NMR. The values for  $k_1$  obtained in this manner were  $0.0042 \text{ s}^{-1}$  (15 equiv  $\text{H}_2\text{O}$ ),  $0.0044 \text{ s}^{-1}$  (30 equiv  $\text{H}_2\text{O}$ ), and  $0.0041 \text{ s}^{-1}$  (45 equiv  $\text{H}_2\text{O}$ ), which clearly does not explain the difference in reaction rates with different quantities of water (see Figure S64), suggesting that hydrolysis of the product iminium ion is turnover-limiting.

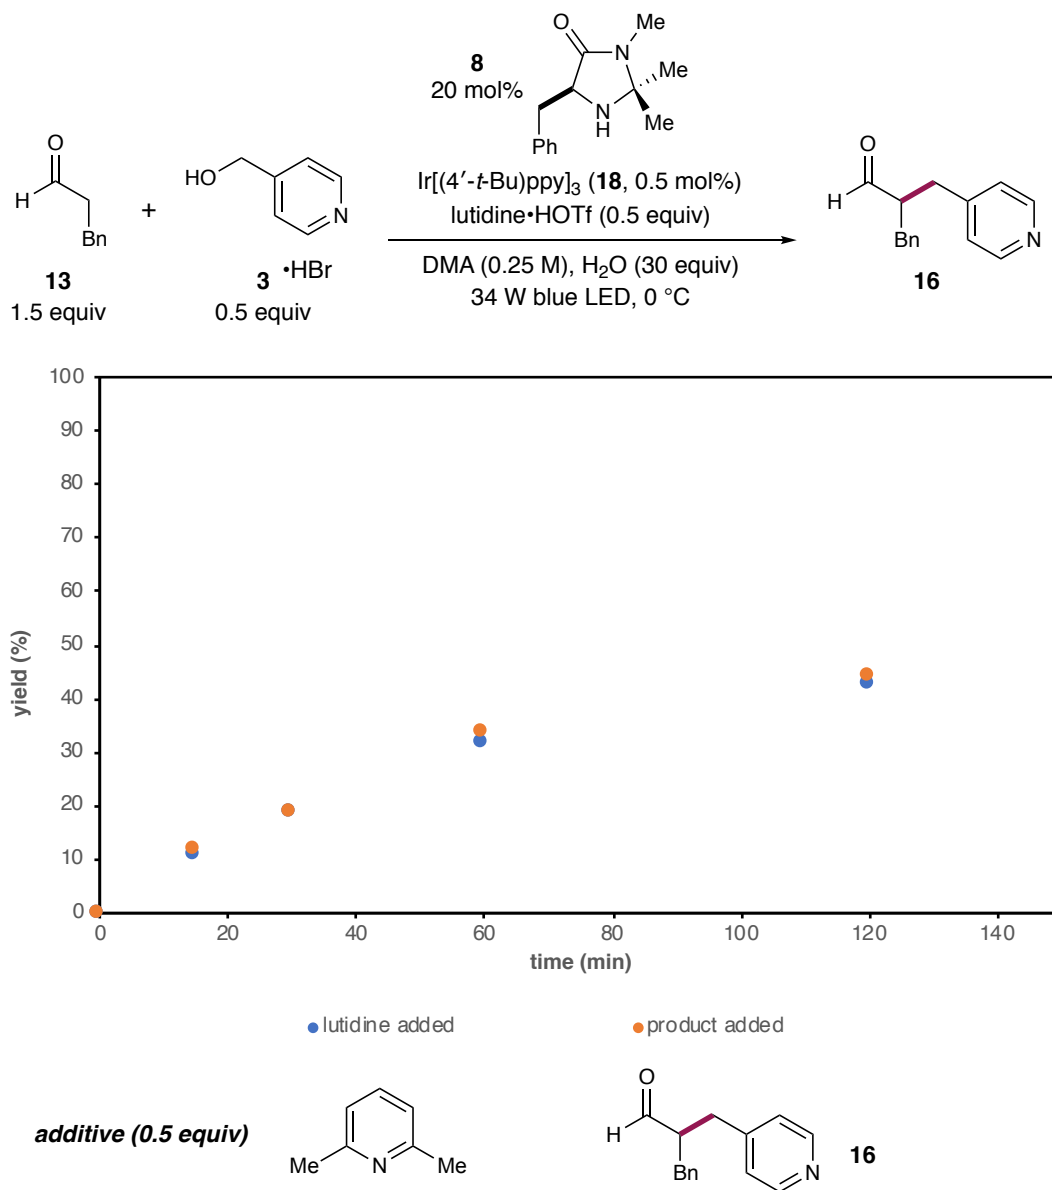

**Figure S66.** Product inhibition experiment.

Finally, Figure S66 illustrates the results of a modification of the standard protocol where 50 mol% less starting aldehyde was employed and 50% of the starting electrophile was replaced with lutidinium triflate (i.e., the leaving group of a representative electrophile is omitted but the

conjugate acid of a basic heteroarene is still included) for two experiments. In one experiment, 2,6-lutidine was employed as the base cocatalyst, and in the other, product **16** was employed as the base cocatalyst. These conditions are designed to simulate a reaction at 50% completion without changing the total amounts of acids and bases, but in one instance, the product aldehyde is replaced with lutidine in order to isolate the effect of removing the product aldehyde functionality from the system. Clearly, no significant difference is observed between the two experiments, suggesting that product inhibition does not occur in this process.

## XXII. References

---

1. Shih, H.-W.; Vander Wal, M. N.; Grange, R. L.; MacMillan, D. W. C. Enantioselective  $\alpha$ -benzylation of aldehydes via photoredox organocatalysis. *J. Am. Chem. Soc.* **2010**, *132*, 13600.
2. Nicewicz, D. A.; MacMillan, D. W. C. Merging photoredox catalysis with organocatalysis: the direct asymmetric alkylation of aldehydes. *Science* **2008**, *322*, 77.
3. Dubroeuq, M.-C.; Bénavidès, J.; Doble, A.; Guilloux, F.; Allam, D.; Vaucher, N.; Bertrand, P.; Guérémy, C.; Renault, C.; Uzan, A.; Le Fur, G. Stereoselective inhibition of the binding of [<sup>3</sup>H]PK 11195 to peripheral-type benzodiazepine binding sites by a quinolinepropanamide derivative. *Eur. J. Pharmacol.* **1986**, *128*, 269.
4. Brouwer, C.; Jenko, K.; Zoghbi, S. S.; Innis, R. B.; Pike, V. W. Development of *N*-Methyl-(2-arylquinolin-4-yl)oxypropanamides as Leads to PET Radioligands for Translocator Protein (18 kDa). *J. Med. Chem.* **2014**, *57*, 6240.
5. Seiple, I. B.; Su, S.; Rodriguez, R. A.; Gianatassio, R.; Fujiwara, Y.; Sobel, A. L.; Baran, P. S. Direct C–H Arylation of Electron-Deficient Heterocycles with Arylboronic Acids. *J. Am. Chem. Soc.* **2010**, *132*, 13194.
6. Bode, J. W.; Doyle, M. P.; Protopopova, M. N.; Zhou, Q. L. Intramolecular Regioselective Insertion into Unactivated Prochiral Carbon-Hydrogen Bonds with Diazoacetates of Primary Alcohols Catalyzed by Chiral Dirhodium(II) Carboxamidates. Highly Enantioselective Total Synthesis of Natural Lignan Lactones. *J. Org. Chem.* **1996**, *61*, 9146.
7. Birch, A. M.; Butlin, R. J.; Clarke, D. S.; Leach, A.; MacFaul, P. A.; O'Donnell, C. J.; Scott, J. S.; Whittamore, P. R. O.; Broo, D. A.; Davidsson, Ö. P.; Johansson, K. E.; De La Motte, H. (AstraZeneca AB, Sweden). Therapeutic agents 812. US Patent 2011/0065706 A1, March 17, 2011.
8. Buratti, W.; Gardini, G. P.; Minisci, F.; Bertini, F.; Galli, R.; Perchinunno, M. Nucleophilic character of alkyl radicals—V. *Tetrahedron* **1971**, *27*, 3655.
9. Millett, A. J.; Habtemariam, A.; Romero-Canelón, I.; Clarkson, G. J.; Sadler, P. J. Contrasting Anticancer Activity of Half-Sandwich Iridium(III) Complexes Bearing Functionally Diverse 2-Phenylpyridine Ligands. *Organometallics* **2015**, *34*, 2683.
10. Eckelmann, J.; Dethlefs, C.; Brammer, S.; Doğan, A.; Uphoff, A.; Lüning, U. Second-Generation Supramolecular Dendrimer with a Defined Structure due to Orthogonal Binding. *Chem. - Eur. J.* **2012**, *18*, 8498.
11. Bilodeau, M. T.; Hartman, G. D (Merck & Co., Inc., USA). Tyrosine kinase inhibitors. US Patent 2003/100567 A1, May 29, 2003.
12. Honda, T.; Tajima, H.; Kawashima, K.; Okamoto, K.; Yamamoto, M.; Inaba, T.; Takeno, Y. (Santen Pharmaceutical Co., Ltd., Japan). Novel cyclic compound having 4-pyridylalkylthio group having (un)substituted amino introduced therein. European Patent 1,717,229 A1, November 2, 2006.



- 
13. Guo, H.; Kim, C. U.; Kim, H. S.; Lee, C.-K.; Lee, I. Y.; Mitchell, M. L.; Son, J. C.; Xu, L. (Gilead Sciences, Inc., USA). Novel HIV reverse transcriptase inhibitors. US Patent 2008/0070920 A1, March 20, 2008.
  14. Heinert, D.; Martell, A. E. Studies on pyridoxine and pyridoxal analogs—I : The synthesis of substituted pyridinealdehydes. *Tetrahedron* **1958**, *3*, 49.
  15. Citterio, A.; Gentile, A.; Minisci, F.; Serravalle, M.; Ventura, S.  $\alpha$ -Hydroxyalkylation of heteroaromatic bases by alcohols and hydroxylamine-O-sulphonic acid. *Tetrahedron* **1985**, *41*, 617.
  16. Gao, F.; Kim, B.-S.; Walsh, P. J. Chemoselective palladium-catalyzed deprotonative arylation/[1,2]-Wittig rearrangement of pyridylmethyl ethers. *Chem. Sci.* **2016**, *7*, 976.
  17. Deutman, A. B. C.; Smits, J. M. M.; De Gelder, R.; Elemans, J. A. A. W.; Nolte, R. J. M.; Rowan, A. E. Strong Induced-Fit Binding of Viologen and Pyridine Derivatives in Adjustable Porphyrin Cavities. *Chem. - Eur. J.* **2014**, *20*, 11574.
  18. Sabot, C.; Kumar, K. A.; Antheaume, C.; Mioskowski, C. Triazabicyclodecene: An Effective Isotope Exchange Catalyst in  $\text{CDCl}_3$ . *J. Org. Chem.* **2007**, *72*, 5001.
  19. Ochiai, M.; Takeuchi, Y.; Katayama, T.; Sueda, T.; Miyamoto, K. Iodobenzene-Catalyzed  $\alpha$ -Acetoxylation of Ketones. In Situ Generation of Hypervalent (Diacloxyiodo)benzenes Using *m*-Chloroperbenzoic Acid. *J. Am. Chem. Soc.* **2005**, *127*, 12244.
  20. Mo, D. L.; Dai, L. X.; Hou, X. L. The reaction of terminal alkynes with  $\text{PhI}(\text{OAc})_2$ : a convenient procedure for the preparation of  $\alpha$ -acyloxy ketones. *Tetrahedron Lett.* **2009**, *50*, 5578.
  21. Nolla-Saltiel, R.; Carrillo-Arcos, U. A.; Porcel, S. Silver Acetate Mediated Acetoxylation of Alkyl Halides. *Synthesis* **2014**, *46*, 165.
  22. Chen, J.; Zhang, Z.; Liu, D.; Zhang, W. Palladium-Catalyzed Chemo- and Enantioselective C–O Bond Cleavage of  $\alpha$ -Acyloxy Ketones by Hydrogenolysis. *Angew. Chem. Int. Ed.* **2016**, *55*, 8444.
  23. Ahrendt, K. A.; Borths, C. J.; MacMillan, D. W. C. New Strategies for Organic Catalysis: The First Highly Enantioselective Organocatalytic Diels–Alder Reaction. *J. Am. Chem. Soc.* **2000**, *122*, 4243.
  24. Abramovitch, R. A.; Giam, C.-S. Aromatic Substitution: Part I. The Reaction of Phenyllithium with 3-Alkylpyridines. Steric Effect and Quantitative Analysis of Isomer Ratios. *Can. J. Chem.* **1962**, *40*, 213.
  25. Li, J.; Warratz, S.; Zell, D.; De Sarkar, S.; Ishikawa, E. E.; Ackermann, L. *N*-Acyl Amino Acid Ligands for Ruthenium(II)-Catalyzed *meta*-C–H tert-Alkylation with Removable Auxiliaries. *J. Am. Chem. Soc.* **2015**, *137*, 13894.
  26. Xu, C.; Shen, Q. Palladium-Catalyzed Trifluoromethylthiolation of Aryl C–H Bonds. *Org. Lett.* **2014**, *16*, 2046.
  27. Kawamorita, S.; Miyazaki, T.; Ohmiya, H.; Iwai, T.; Sawamura, M. Rh-Catalyzed *Ortho*-Selective C–H Borylation of *N*-Functionalized Arenes with Silica-Supported Bridgehead Monophosphine Ligands. *J. Am. Chem. Soc.* **2011**, *133*, 19310.

- 
28. Andersson, H.; Sainte-Luce Banchelin, T.; Das, S.; Olsson, R.; Almqvist, F. Efficient, mild and completely regioselective synthesis of substituted pyridines. *Chem. Commun.* **2010**, *46*, 3384.
  29. Stoessel, P.; Bach, I.; Parham, A.; Breuning, E.; Spreitzer, H. (Merck Patent GmbH). Method for producing iridium(III)keto ketonates. US Patent 2008/0132720 A1, June 5, 2008.
  30. Dedeian, K.; Djurovich, P. I.; Garces, F. O.; Carlson, G.; Watts, R. J. A New Synthetic Route to the Preparation of a Series of Strong Photoreducing Agents: *fac* Tris-Ortho-Metalated Complexes of Iridium(III) with Substituted 2-Phenylpyridines. *Inorg. Chem.* **1991**, *30*, 1685.
  31. Singh, A.; Teegardin, K.; Kelly, M.; Prasad, K. S.; Krishnan, S.; Weaver, J. D. Facile synthesis and complete characterization of homoleptic and heteroleptic cyclometalated Iridium(III) complexes for photocatalysis. *J. Organomet. Chem.* **2015**, *776*, 51.
  32. Tamayo, A. B.; Alleyne, B. D.; Djurovich, P. I.; Lamansky, S.; Tsyba, I.; Ho, N. N.; Bau, R.; Thompson, M. E. Synthesis and Characterization of Facial and Meridional Tris-cyclometalated Iridium(III) Complexes. *J. Am. Chem. Soc.* **2003**, *125*, 7377.
  33. Brennan, J. L.; Keyes, T. E.; Forster, R. J. Photonic and Electrochemical Properties of Adsorbed  $[\text{Ru}(\text{dpp})_2(\text{Qbpy})]^{2+}$  Luminophores. *Langmuir* **2006**, *22*, 10754.
  34. Døssing, A.; Ryu, C. K.; Kudo, S.; Ford, P. C. Competitive Bimolecular Electron- and Energy-Transfer Quenching of the Excited State(s) of the Tetranuclear Copper(I) Cluster  $\text{Cu}_4\text{I}_4\text{py}_4$ . Evidence for Large Reorganization Energies in an Excited-State Electron Transfer. *J. Am. Chem. Soc.* **1993**, *115*, 5132.
  35. Yayla, H. G.; Peng, F.; Mangion, I. K.; McLaughlin, M.; Campeau, L.-C.; Davies, I. W.; DiRocco, D. A.; Knowles, R. R. Discovery and mechanistic study of a photocatalytic indoline dehydrogenation for the synthesis of elbasvir. *Chem. Sci.* **2016**, *7*, 2066.
  36. Hatchard, C. G.; Parker, C. A. A new sensitive chemical actinometer - II. Potassium ferrioxalate as a standard chemical actinometer. *Proc. R. Soc. A Math. Phys. Eng. Sci.* **1956**, *235*, 518.
  37. Bacarella, A. L.; Grunwald, E.; Marshall, H. P.; Purlee, E. L. The Potentiometric Measurement of Acid Dissociation Constants and pH in the System Methanol-water.  $\text{pK}_\text{A}$  Values for Carboxylic Acids and Anilinium Ions. *J. Org. Chem.* **1955**, *20*, 747.
  38. Berg, U.; Jencks, W. P. Does dissociation of amine water complexes depend upon amine basicity? Proton exchange between quinuclidinium ions and solvent. *J. Am. Chem. Soc.* **1991**, *113*, 6997.
  39. Reeve, W.; Erikson, C. M.; Aluotto, P. F. A new method for the determination of the relative acidities of alcohols in alcoholic solutions. The nucleophilicities and competitive reactivities of alkoxides and phenoxides. *Can. J. Chem.* **1979**, *57*, 2747.
  40. Arm, H.; Hochstrasser, K.; Schindler, P.-W. Acid Dissociation-constant of Triethylsilanol in Aqueous-solution. *Chimia* **1974**, *28*, 237.
  41. Deno, N. C.; Turner, J. O. The Basicity of Alcohols and Ethers. *J. Org. Chem.* **1966**, *31*, 1969.

- 
42. West, R.; Whatley, L. S.; Lake, K. J. Hydrogen Bonding Studies. V. The Relative Basicities of Ethers, Alkoxysilanes and Siloxanes and the Nature of the Silicon–Oxygen Bond. *J. Am. Chem. Soc.* **1961**, *83*, 761.

# XXIII. Chiral HPLC Chromatograms

Data File C:\CHEM32\2\DATA\EDN\DEF\_LC 2017-07-11 08-28-13\EDN-1-345.D  
Sample Name: EDN-1-345

```
=====
Acq. Operator   : SYSTEM                      Seq. Line :    5
Acq. Instrument : Biggie                     Location  : Vial 52
Injection Date  : 7/11/2017 10:14:29 AM      Inj       :    1
                                           Inj Volume: 5.000 µl
Acq. Method     : C:\CHEM32\2\DATA\EDN\DEF_LC 2017-07-11 08-28-13\10ETOH30-AD.M
Last changed    : 7/11/2017 8:28:13 AM by SYSTEM
Analysis Method : C:\CHEM32\2\DATA\EDN\DEF_LC 2017-07-11 08-28-13\10ETOH30-AD.M (Sequence
Method)
Last changed    : 7/12/2017 8:58:28 AM by SYSTEM
                 (modified after loading)
Method Info     : 10% EtOH in hexanes, 30 min, AD-H, 1.0 mL/min
=====
```

Additional Info : Peak(s) manually integrated

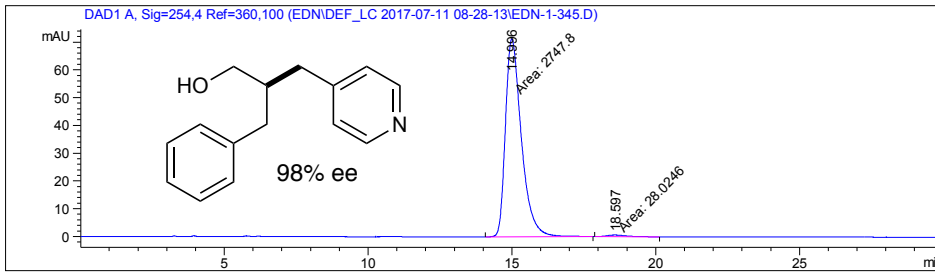

=====  
Area Percent Report  
=====

```
Sorted By      :      Signal
Multiplier     :      1.0000
Dilution       :      1.0000
Do not use Multiplier & Dilution Factor with ISTDs
```

Signal 1: DAD1 A, Sig=254,4 Ref=360,100

| Peak # | RetTime [min] | Type | Width [min] | Area [mAU*s] | Height [mAU] | Area %  |
|--------|---------------|------|-------------|--------------|--------------|---------|
| 1      | 14.996        | MM   | 0.6432      | 2747.80420   | 71.20477     | 98.9904 |
| 2      | 18.597        | MM   | 0.7815      | 28.02461     | 5.97682e-1   | 1.0096  |

Totals :                    2775.82881    71.80245

=====  
\*\*\* End of Report \*\*\*

Data File C:\CHEM32\2\DATA\EDN\DEF\_LC 2017-07-11 08-28-13\EDN-1-374.D  
Sample Name: EDN-1-374

```
=====
Acq. Operator   : SYSTEM                      Seq. Line :    4
Acq. Instrument : Biggie                      Location  : Vial 51
Injection Date  : 7/11/2017 9:43:02 AM       Inj       :    1
                                           Inj Volume: 5.000 µl

Acq. Method     : C:\CHEM32\2\DATA\EDN\DEF_LC 2017-07-11 08-28-13\10ETOH30-AD.M
Last changed    : 7/11/2017 8:28:13 AM by SYSTEM
Analysis Method : C:\CHEM32\2\DATA\EDN\DEF_LC 2017-07-11 08-28-13\10ETOH30-AD.M (Sequence
Method)
Last changed    : 7/12/2017 8:58:28 AM by SYSTEM
                 (modified after loading)
Method Info     : 10% EtOH in hexanes, 30 min, AD-H, 1.0 mL/min
=====
```

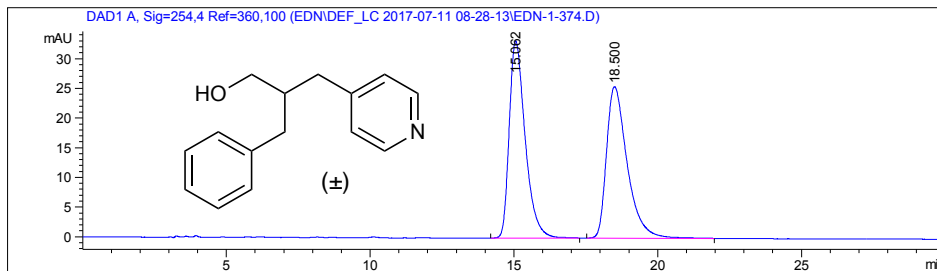

=====  
Area Percent Report  
=====

Sorted By : Signal  
Multiplier : 1.0000  
Dilution : 1.0000  
Do not use Multiplier & Dilution Factor with ISTDs

Signal 1: DAD1 A, Sig=254,4 Ref=360,100

| Peak # | RetTime [min] | Type | Width [min] | Area [mAU*s] | Height [mAU] | Area %  |
|--------|---------------|------|-------------|--------------|--------------|---------|
| 1      | 15.062        | BB   | 0.5881      | 1280.98230   | 33.20050     | 50.1756 |
| 2      | 18.500        | BB   | 0.7494      | 1272.01611   | 25.52609     | 49.8244 |

Totals : 2552.99841 58.72659

=====  
\*\*\* End of Report \*\*\*

Data File C:\CHEM32\2\DATA\KN\DEF\_LC 2017-06-29 09-01-55\EDN-1-487-15IPA45ODB.D  
Sample Name: EDN-1-487-15IPA45ODb

```
=====
Acq. Operator   : SYSTEM                      Seq. Line : 40
Acq. Instrument : Biggie                     Location  : Vial 49
Injection Date  : 6/29/2017 9:53:37 PM      Inj       : 1
                                           Inj Volume: 5.000 µl

Acq. Method    : C:\CHEM32\2\DATA\KN\DEF_LC 2017-06-29 09-01-55\15IPA45-OD.M
Last changed   : 6/29/2017 12:08:18 PM by SYSTEM
Analysis Method: C:\CHEM32\2\DATA\KN\DEF_LC 2017-06-29 09-01-55\15IPA45-OD.M (Sequence
Method)
Last changed   : 7/12/2017 11:16:08 AM by SYSTEM
                (modified after loading)
Method Info    : 15% IPA in hexanes, 45 min, OD-H, 1.0 mL/min
=====
```

Additional Info : Peak(s) manually integrated

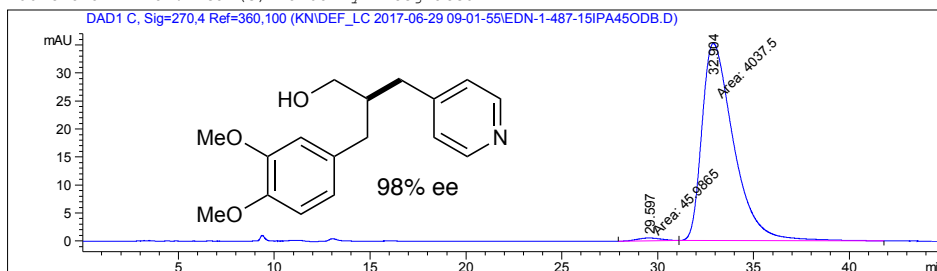

Area Percent Report

```
Sorted By      : Signal
Multiplier     : 1.0000
Dilution       : 1.0000
Do not use Multiplier & Dilution Factor with ISTDs
```

Signal 1: DAD1 C, Sig=270,4 Ref=360,100

| Peak # | RetTime [min] | Type | Width [min] | Area [mAU*s] | Height [mAU] | Area %  |
|--------|---------------|------|-------------|--------------|--------------|---------|
| 1      | 29.597        | MM   | 1.4568      | 45.98654     | 5.26130e-1   | 1.1262  |
| 2      | 32.904        | MM   | 1.9103      | 4037.49756   | 35.22487     | 98.8738 |

Totals : 4083.48410 35.75100

\*\*\* End of Report \*\*\*

Data File C:\CHEM32\2\DATA\EDN\DEF\_LC 2017-04-28 18-04-15\EDN-1-486-15IPA450D.D  
Sample Name: EDN-1-486-15IPA450D

```
=====
Acq. Operator   : SYSTEM                      Seq. Line : 13
Acq. Instrument : Biggie                     Location  : Vial 21
Injection Date  : 4/28/2017 9:46:42 PM      Inj       : 1
                                           Inj Volume: 5.000 µl

Acq. Method    : C:\CHEM32\2\DATA\EDN\DEF_LC 2017-04-28 18-04-15\15IPA45-OD.M
Last changed   : 4/28/2017 9:27:15 PM by SYSTEM
Analysis Method : C:\CHEM32\2\DATA\EDN\DEF_LC 2017-04-28 18-04-15\15IPA45-OD.M (Sequence
Method)
Last changed   : 7/12/2017 11:18:03 AM by SYSTEM
                (modified after loading)
Method Info    : 15% IPA in hexanes, 45 min, OD-H, 1.0 mL/min
=====
```

Additional Info : Peak(s) manually integrated

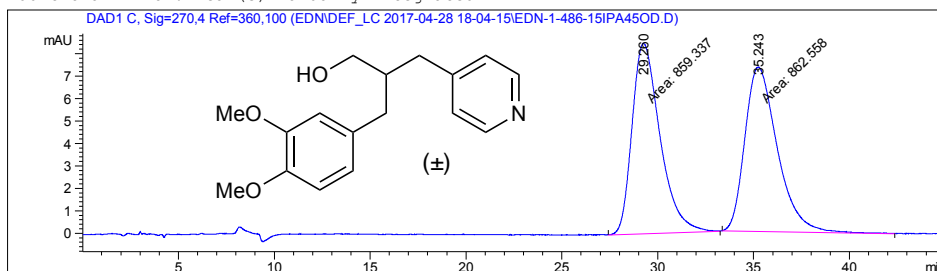

Area Percent Report

```
Sorted By      : Signal
Multiplier     : 1.0000
Dilution       : 1.0000
Do not use Multiplier & Dilution Factor with ISTDs
```

Signal 1: DAD1 C, Sig=270,4 Ref=360,100

| Peak # | RetTime [min] | Type | Width [min] | Area [mAU*s] | Height [mAU] | Area %  |
|--------|---------------|------|-------------|--------------|--------------|---------|
| 1      | 29.260        | MM   | 1.6897      | 859.33679    | 8.47634      | 49.9065 |
| 2      | 35.243        | MM   | 1.9633      | 862.55768    | 7.32240      | 50.0935 |

Totals : 1721.89447 15.79873

\*\*\* End of Report \*\*\*





Data File C:\CHEM32\2\DATA\EDN\DEF\_LC 2017-04-26 18-51-24\EDN-1-482-AS-B.D  
Sample Name: EDN-1-482-AS-b

```
=====
Acq. Operator   : SYSTEM                      Seq. Line :    5
Acq. Instrument : Biggie                      Location  : Vial 21
Injection Date  : 4/26/2017 9:09:36 PM       Inj       :    1
                                           Inj Volume: 5.000 µl

Acq. Method    : C:\CHEM32\2\DATA\EDN\DEF_LC 2017-04-26 18-51-24\5IPA40-AS.M
Last changed   : 4/26/2017 6:51:24 PM by SYSTEM
Analysis Method: C:\CHEM32\2\DATA\EDN\DEF_LC 2017-04-26 18-51-24\5IPA40-AS.M (Sequence
Method)
Last changed   : 7/12/2017 11:06:17 AM by SYSTEM
               (modified after loading)
Method Info    : 5% IPA in hexanes, 40 min, AS-H, 1.0 mL/min
=====
```

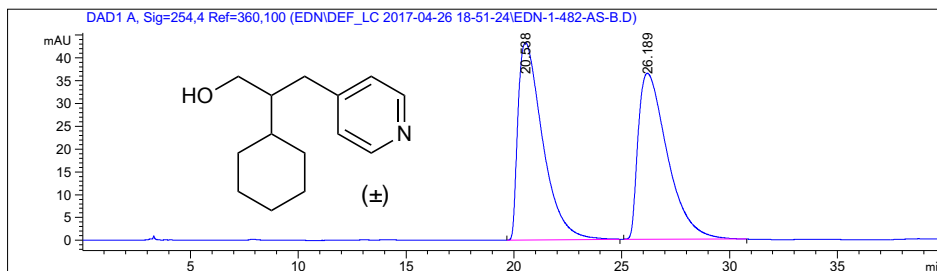

=====  
Area Percent Report  
=====

```
Sorted By      :      Signal
Multiplier     :      1.0000
Dilution       :      1.0000
Do not use Multiplier & Dilution Factor with ISTDs
```

Signal 1: DAD1 A, Sig=254,4 Ref=360,100

| Peak # | RetTime [min] | Type | Width [min] | Area [mAU*s] | Height [mAU] | Area %  |
|--------|---------------|------|-------------|--------------|--------------|---------|
| 1      | 20.538        | BB   | 1.2045      | 3438.06519   | 43.29244     | 50.1119 |
| 2      | 26.189        | BB   | 1.3997      | 3422.70752   | 36.37831     | 49.8881 |

Totals :                    6860.77271    79.67075

=====  
\*\*\* End of Report \*\*\*

Data File C:\CHEM32\2\DATA\EDN\DEF\_LC 2017-05-01 09-43-04\EDN-1-489.D  
Sample Name: EDN-1-489

```
=====
Acq. Operator   : SYSTEM                      Seq. Line :    3
Acq. Instrument : Biggie                     Location  : Vial 24
Injection Date  : 5/1/2017 10:27:31 AM      Inj       :    1
                                           Inj Volume: 5.000 µl
                                           Actual Inj Volume: 3.000 µl
Different Inj Volume from Sample Entry!
Acq. Method     : C:\CHEM32\2\DATA\EDN\DEF_LC 2017-05-01 09-43-04\10IPA30-AD.M
Last changed    : 5/1/2017 9:43:04 AM by SYSTEM
Analysis Method : C:\CHEM32\2\DATA\EDN\DEF_LC 2017-05-01 09-43-04\10IPA30-AD.M (Sequence
Method)
Last changed    : 7/12/2017 11:08:26 AM by SYSTEM
                 (modified after loading)
Method Info     : 10% IPA in hexanes, 30 min, AD-H, 1.0 mL/min
=====
```

Additional Info : Peak(s) manually integrated

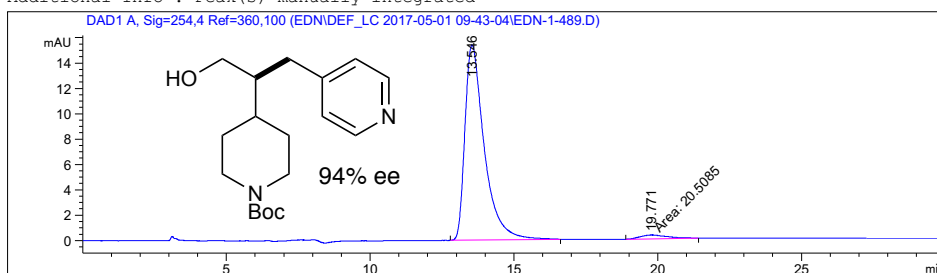

```
=====
Area Percent Report
=====
```

```
Sorted By      :      Signal
Multiplier     :      1.0000
Dilution       :      1.0000
Do not use Multiplier & Dilution Factor with ISTDs
```

Signal 1: DAD1 A, Sig=254,4 Ref=360,100

| Peak # | RetTime [min] | Type | Width [min] | Area [mAU*s] | Height [mAU] | Area %  |
|--------|---------------|------|-------------|--------------|--------------|---------|
| 1      | 13.546        | BB   | 0.7006      | 720.93195    | 15.38874     | 97.2340 |
| 2      | 19.771        | MM   | 1.1010      | 20.50846     | 3.10454e-1   | 2.7660  |

Totals : 741.44040 15.69920

```
=====
*** End of Report ***
=====
```

Data File C:\CHEM32\2\DATA\EDN\DEF\_LC 2017-05-01 09-43-04\EDN-1-488-B.D  
Sample Name: EDN-1-488-b

```
=====
Acq. Operator   : SYSTEM                               Seq. Line :    4
Acq. Instrument : Biggie                               Location  : Vial 23
Injection Date  : 5/1/2017 10:59:04 AM                Inj       :    1
                                                    Inj Volume: 5.000 µl
Different Inj Volume from Sample Entry! Actual Inj Volume : 3.000 µl
Acq. Method     : C:\CHEM32\2\DATA\EDN\DEF_LC 2017-05-01 09-43-04\10IPA30-AD.M
Last changed    : 5/1/2017 9:43:04 AM by SYSTEM
Analysis Method : C:\CHEM32\2\DATA\EDN\DEF_LC 2017-05-01 09-43-04\10IPA30-AD.M (Sequence
Method)
Last changed    : 7/12/2017 11:08:26 AM by SYSTEM
                  (modified after loading)
Method Info     : 10% IPA in hexanes, 30 min, AD-H, 1.0 mL/min
=====
```

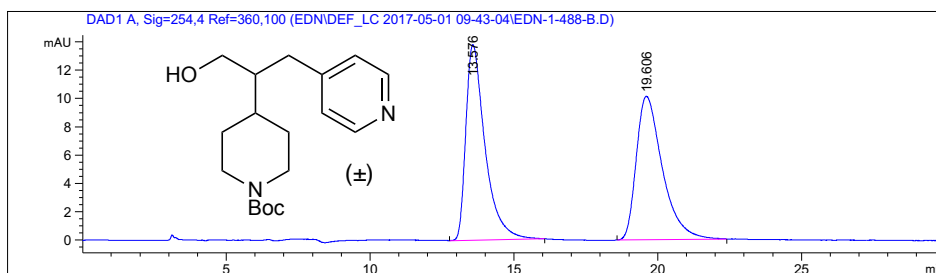

=====  
Area Percent Report  
=====

```
Sorted By      :      Signal
Multiplier     :      1.0000
Dilution       :      1.0000
Do not use Multiplier & Dilution Factor with ISTDs
```

Signal 1: DAD1 A, Sig=254,4 Ref=360,100

| Peak # | RetTime [min] | Type | Width [min] | Area [mAU*s] | Height [mAU] | Area %  |
|--------|---------------|------|-------------|--------------|--------------|---------|
| 1      | 13.576        | BB   | 0.6856      | 640.49304    | 13.79796     | 50.0659 |
| 2      | 19.606        | BB   | 0.9416      | 638.80804    | 10.13159     | 49.9341 |

Totals :                    1279.30109    23.92955

=====  
\*\*\* End of Report \*\*\*

Data File C:\CHEM32\2\DATA\EDN\DEF\_LC 2017-04-14 13-49-21\EDN-1-471-B.D  
Sample Name: EDN-1-471-b

```
=====
Acq. Operator   : SYSTEM                      Seq. Line :    3
Acq. Instrument : Biggie                     Location  : Vial 22
Injection Date  : 4/14/2017 2:33:06 PM      Inj       :    1
                                           Inj Volume: 5.000 µl

Acq. Method     : C:\CHEM32\2\DATA\EDN\DEF_LC 2017-04-14 13-49-21\5IPA30-OD.M
Last changed    : 4/14/2017 1:49:22 PM by SYSTEM
Analysis Method : C:\CHEM32\2\DATA\EDN\DEF_LC 2017-04-14 13-49-21\5IPA30-OD.M (Sequence
Method)
Last changed    : 7/12/2017 10:57:47 AM by SYSTEM
                 (modified after loading)
Method Info     : 5% IPA in hexanes, 30 min, OD-H, 1.0 mL/min
=====
```

Additional Info : Peak(s) manually integrated

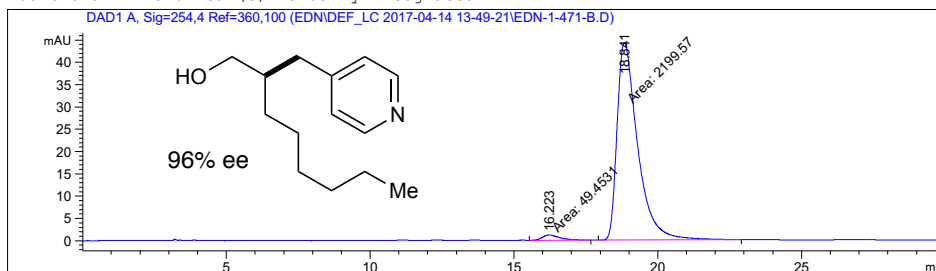

=====  
Area Percent Report  
=====

Sorted By : Signal  
Multiplier : 1.0000  
Dilution : 1.0000  
Do not use Multiplier & Dilution Factor with ISTDs

Signal 1: DAD1 A, Sig=254,4 Ref=360,100

| Peak # | RetTime [min] | Type | Width [min] | Area [mAU*s] | Height [mAU] | Area %  |
|--------|---------------|------|-------------|--------------|--------------|---------|
| 1      | 16.223        | MM   | 0.7061      | 49.45309     | 1.16727      | 2.1989  |
| 2      | 18.841        | MM   | 0.8293      | 2199.56763   | 44.20516     | 97.8011 |

Totals : 2249.02072 45.37243

=====  
\*\*\* End of Report \*\*\*

Data File C:\CHEM32\2\DATA\EDN\DEF\_LC 2017-04-14 11-43-51\EDN-1-470-B.D  
Sample Name: EDN-1-470-b

```
=====
Acq. Operator   : SYSTEM                      Seq. Line :    3
Acq. Instrument : Biggie                      Location  : Vial 21
Injection Date  : 4/14/2017 12:27:24 PM      Inj       :    1
                                                Inj Volume: 5.000 µl

Acq. Method     : C:\CHEM32\2\DATA\EDN\DEF_LC 2017-04-14 11-43-51\5IPA30-OD.M
Last changed    : 4/14/2017 11:43:52 AM by SYSTEM
Analysis Method : C:\CHEM32\2\DATA\EDN\DEF_LC 2017-04-14 11-43-51\5IPA30-OD.M (Sequence
Method)
Last changed    : 7/12/2017 10:56:43 AM by SYSTEM
                (modified after loading)
Method Info     : 5% IPA in hexanes, 30 min, OD-H, 1.0 mL/min
=====
```

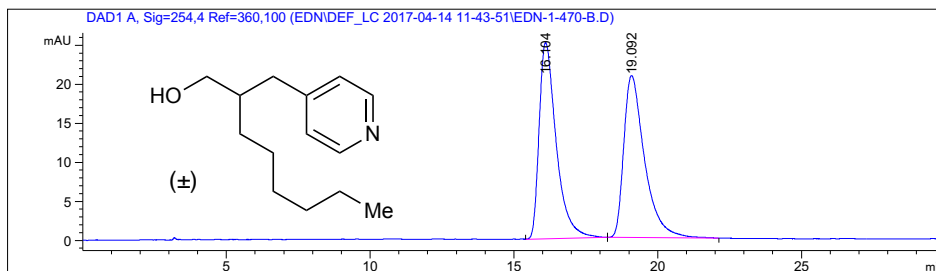

=====  
Area Percent Report  
=====

```
Sorted By      :      Signal
Multiplier     :      1.0000
Dilution       :      1.0000
Do not use Multiplier & Dilution Factor with ISTDs
```

Signal 1: DAD1 A, Sig=254,4 Ref=360,100

| Peak # | RetTime [min] | Type | Width [min] | Area [mAU*s] | Height [mAU] | Area %  |
|--------|---------------|------|-------------|--------------|--------------|---------|
| 1      | 16.104        | BB   | 0.6196      | 1037.39380   | 25.12906     | 49.7971 |
| 2      | 19.092        | BB   | 0.7576      | 1045.84961   | 20.76440     | 50.2029 |

Totals :                    2083.24341    45.89346

=====  
\*\*\* End of Report \*\*\*

Data File C:\CHEM32\2\DATA\EDN\DEF\_LC 2017-04-17 07-38-18\EDN-1-473-C.D  
Sample Name: EDN-1-473-c

```
=====
Acq. Operator   : SYSTEM                      Seq. Line :    4
Acq. Instrument : Biggie                      Location  : Vial 24
Injection Date  : 4/17/2017 8:54:01 AM       Inj       :    1
                                           Inj Volume: 5.000 µl

Acq. Method     : C:\CHEM32\2\DATA\EDN\DEF_LC 2017-04-17 07-38-18\10IPA30-AS.M
Last changed    : 4/17/2017 7:38:19 AM by SYSTEM
Analysis Method : C:\CHEM32\2\DATA\EDN\DEF_LC 2017-04-17 07-38-18\10IPA30-AS.M (Sequence
Method)
Last changed    : 7/12/2017 10:59:51 AM by SYSTEM
                 (modified after loading)
Method Info     : 10% IPA in hexanes, 30 min, AS-H, 1.0 mL/min
=====
```

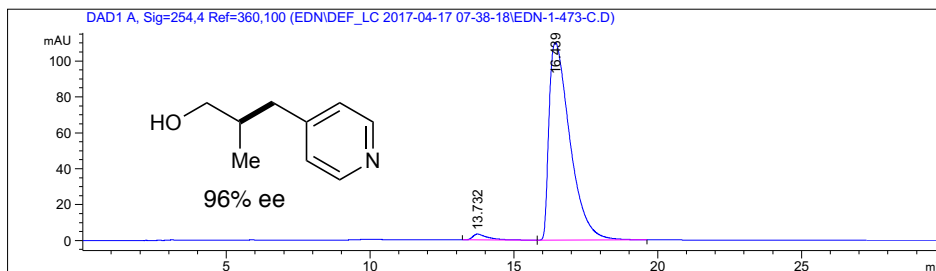

=====  
Area Percent Report  
=====

```
Sorted By      :      Signal
Multiplier     :      1.0000
Dilution       :      1.0000
Do not use Multiplier & Dilution Factor with ISTDs
```

Signal 1: DAD1 A, Sig=254,4 Ref=360,100

| Peak # | RetTime [min] | Type | Width [min] | Area [mAU*s] | Height [mAU] | Area %  |
|--------|---------------|------|-------------|--------------|--------------|---------|
| 1      | 13.732        | BB   | 0.5167      | 118.00967    | 3.25697      | 2.0873  |
| 2      | 16.439        | BB   | 0.7771      | 5535.66895   | 110.00955    | 97.9127 |

Totals :                    5653.67861  113.26652

=====  
\*\*\* End of Report \*\*\*

Data File C:\CHEM32\2\DATA\EDN\DEF\_LC 2017-04-15 14-51-34\EDN-1-472-10IPA30AS-B.D  
Sample Name: EDN-1-472-10IPA30AS-b

```
=====
Acq. Operator   : SYSTEM                      Seq. Line : 12
Acq. Instrument : Biggie                     Location  : Vial 23
Injection Date  : 4/15/2017 5:46:23 PM      Inj       : 1
                                           Inj Volume: 5.000 µl

Acq. Method     : C:\CHEM32\2\DATA\EDN\DEF_LC 2017-04-15 14-51-34\10IPA30-AS.M
Last changed    : 4/15/2017 3:18:53 PM by SYSTEM
Analysis Method : C:\CHEM32\2\DATA\EDN\DEF_LC 2017-04-15 14-51-34\10IPA30-AS.M (Sequence
Method)
Last changed    : 7/12/2017 10:58:49 AM by SYSTEM
                 (modified after loading)
Method Info     : 10% IPA in hexanes, 30 min, AS-H, 1.0 mL/min
=====
```

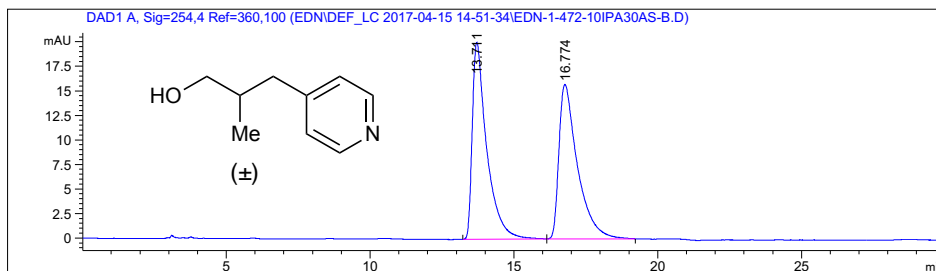

=====  
Area Percent Report  
=====

```
Sorted By      : Signal
Multiplier     : 1.0000
Dilution       : 1.0000
Do not use Multiplier & Dilution Factor with ISTDs
```

Signal 1: DAD1 A, Sig=254,4 Ref=360,100

| Peak # | RetTime [min] | Type | Width [min] | Area [mAU*s] | Height [mAU] | Area %  |
|--------|---------------|------|-------------|--------------|--------------|---------|
| 1      | 13.711        | BB   | 0.5023      | 701.84137    | 20.05322     | 49.9755 |
| 2      | 16.774        | BB   | 0.6546      | 702.53088    | 15.74252     | 50.0245 |

Totals : 1404.37225 35.79574

=====  
\*\*\* End of Report \*\*\*

Data File C:\CHEM32\2\DATA\EDN\DEF\_LC 2017-04-19 08-40-39\EDN-1-475-B.D  
Sample Name: EDN-1-475-b

```
=====
Acq. Operator   : SYSTEM                      Seq. Line :    5
Acq. Instrument : Biggie                      Location  : Vial 27
Injection Date  : 4/19/2017 10:58:17 AM      Inj       :    1
                                           Inj Volume: 5.000 µl

Acq. Method    : C:\CHEM32\2\DATA\EDN\DEF_LC 2017-04-19 08-40-39\3IPA40-OD.M
Last changed   : 4/19/2017 9:27:06 AM by SYSTEM
Analysis Method : C:\CHEM32\2\DATA\EDN\DEF_LC 2017-04-19 08-40-39\3IPA40-OD.M (Sequence
Method)
Last changed   : 7/12/2017 11:01:20 AM by SYSTEM
                (modified after loading)
Method Info    : 3% IPA in hexanes, 40 min, OD-H, 1.0 mL/min
=====
```

Additional Info : Peak(s) manually integrated

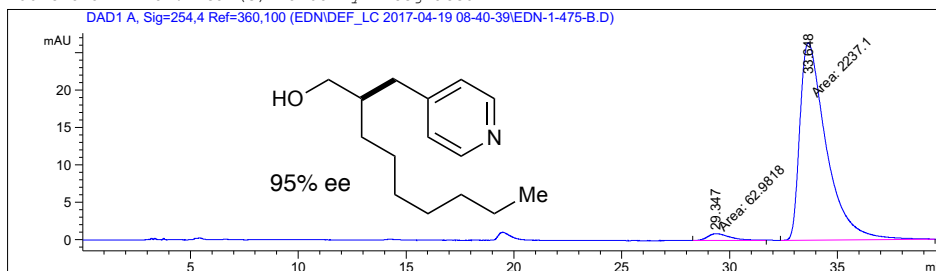

=====  
Area Percent Report  
=====

```
Sorted By      :      Signal
Multiplier     :      1.0000
Dilution      :      1.0000
Do not use Multiplier & Dilution Factor with ISTDs
```

Signal 1: DAD1 A, Sig=254,4 Ref=360,100

| Peak # | RetTime [min] | Type | Width [min] | Area [mAU*s] | Height [mAU] | Area %  |
|--------|---------------|------|-------------|--------------|--------------|---------|
| 1      | 29.347        | MM   | 1.1670      | 62.98179     | 8.99461e-1   | 2.7382  |
| 2      | 33.648        | MM   | 1.4141      | 2237.09985   | 26.36742     | 97.2618 |

Totals :                    2300.08165    27.26688

=====  
\*\*\* End of Report \*\*\*



Data File C:\CHEM32\2\DATA\EDN\DEF\_LC 2017-04-19 08-40-39\EDN-1-474.D  
Sample Name: EDN-1-474

```
=====
Acq. Operator   : SYSTEM                      Seq. Line :    6
Acq. Instrument : Biggie                     Location  : Vial 26
Injection Date  : 4/19/2017 11:39:49 AM      Inj       :    1
                                           Inj Volume: 5.000 µl

Acq. Method     : C:\CHEM32\2\DATA\EDN\DEF_LC 2017-04-19 08-40-39\3IPA40-OD.M
Last changed    : 4/19/2017 9:27:06 AM by SYSTEM
Analysis Method : C:\CHEM32\2\DATA\EDN\DEF_LC 2017-04-19 08-40-39\3IPA40-OD.M (Sequence
Method)
Last changed    : 7/12/2017 11:02:40 AM by SYSTEM
Method Info     : 3% IPA in hexanes, 40 min, OD-H, 1.0 mL/min
=====
```

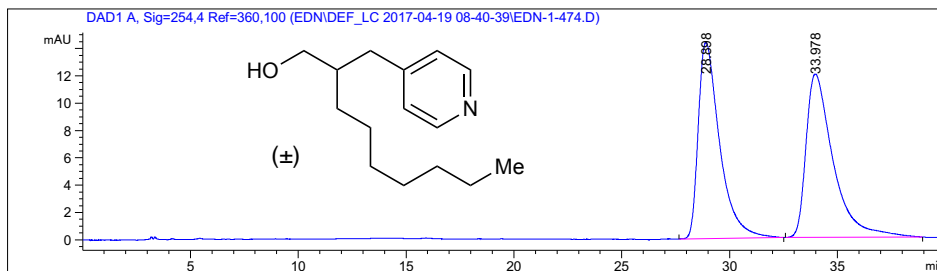

=====  
Area Percent Report  
=====

```
Sorted By      :      Signal
Multiplier     :      1.0000
Dilution       :      1.0000
Do not use Multiplier & Dilution Factor with ISTDs
```

Signal 1: DAD1 A, Sig=254,4 Ref=360,100

| Peak # | RetTime [min] | Type | Width [min] | Area [mAU*s] | Height [mAU] | Area %  |
|--------|---------------|------|-------------|--------------|--------------|---------|
| 1      | 28.898        | BB   | 1.0103      | 992.85840    | 14.36623     | 48.6150 |
| 2      | 33.978        | BB   | 1.2373      | 1049.42810   | 11.96429     | 51.3850 |

Totals : 2042.28650 26.33052

=====  
\*\*\* End of Report \*\*\*



Data File C:\CHEM32\2\DATA\EDN\DEF\_LC 2017-04-21 16-09-57\EDN-1-479-C.D  
Sample Name: EDN-1-479-c

```
=====
Acq. Operator   : SYSTEM                      Seq. Line :    6
Acq. Instrument : Biggie                     Location  : Vial 21
Injection Date  : 4/21/2017 6:28:33 PM      Inj       :    1
                                           Inj Volume: 5.000 µl

Acq. Method     : C:\CHEM32\2\DATA\EDN\DEF_LC 2017-04-21 16-09-57\5IPA30-OD.M
Last changed    : 4/21/2017 4:09:58 PM by SYSTEM
Analysis Method : C:\CHEM32\2\DATA\EDN\DEF_LC 2017-04-21 16-09-57\5IPA30-OD.M (Sequence
Method)
Last changed    : 7/12/2017 11:03:25 AM by SYSTEM
                 (modified after loading)
Method Info     : 5% IPA in hexanes, 30 min, OD-H, 1.0 mL/min
=====
```

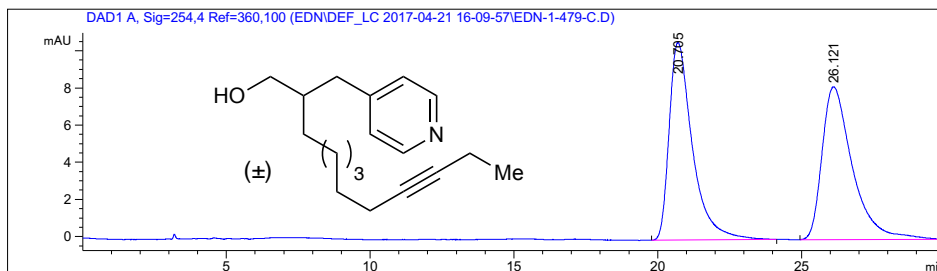

=====  
Area Percent Report  
=====

Sorted By : Signal  
Multiplier : 1.0000  
Dilution : 1.0000  
Do not use Multiplier & Dilution Factor with ISTDs

Signal 1: DAD1 A, Sig=254,4 Ref=360,100

| Peak # | RetTime [min] | Type | Width [min] | Area [mAU*s] | Height [mAU] | Area %  |
|--------|---------------|------|-------------|--------------|--------------|---------|
| 1      | 20.705        | BB   | 0.8463      | 600.09369    | 10.63472     | 49.8838 |
| 2      | 26.121        | BB   | 1.0415      | 602.89056    | 8.22219      | 50.1162 |

Totals : 1202.98425 18.85691

=====  
\*\*\* End of Report \*\*\*

Data File C:\CHEM32\2\DATA\EDN\DEF\_LC 2017-07-11 08-28-13\EDN-1-364D.D  
Sample Name: EDN-1-364d

```
=====
Acq. Operator   : SYSTEM                      Seq. Line : 30
Acq. Instrument : Biggie                      Location  : Vial 60
Injection Date  : 7/11/2017 10:07:49 PM      Inj       : 1
                                           Inj Volume: 5.000 µl
Different Inj Volume from Sample Entry! Actual Inj Volume : 2.000 µl
Acq. Method    : C:\CHEM32\2\DATA\EDN\DEF_LC 2017-07-11 08-28-13\5ETOH40-AD.M
Last changed   : 7/11/2017 4:40:14 PM by SYSTEM
Analysis Method : C:\CHEM32\2\DATA\EDN\DEF_LC 2017-07-11 08-28-13\5ETOH40-AD.M (Sequence
Method)
Last changed   : 7/12/2017 9:22:34 AM by SYSTEM
Method Info    : 5% EtOH in hexanes, 40 min, AD-H, 1.0 mL/min
=====
```

Additional Info : Peak(s) manually integrated

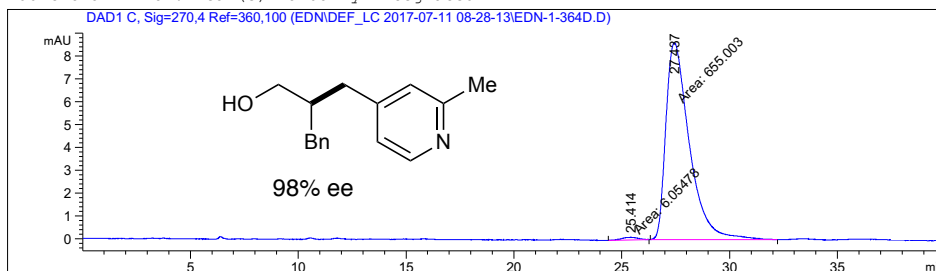

Area Percent Report

```
Sorted By      : Signal
Multiplier     : 1.0000
Dilution       : 1.0000
Do not use Multiplier & Dilution Factor with ISTDs
```

Signal 1: DAD1 C, Sig=270,4 Ref=360,100

| Peak # | RetTime [min] | Type | Width [min] | Area [mAU*s] | Height [mAU] | Area %  |
|--------|---------------|------|-------------|--------------|--------------|---------|
| 1      | 25.414        | MM   | 0.8691      | 6.05478      | 1.16108e-1   | 0.9159  |
| 2      | 27.437        | MM   | 1.2663      | 655.00348    | 8.62085      | 99.0841 |

Totals : 661.05826 8.73696

\*\*\* End of Report \*\*\*



Data File C:\CHEM32\2\DATA\GHL\DEF\_LC 2016-12-09 02-52-45\EDN-1-364-2,6ME2B.D  
Sample Name: EDN-1-364-2,6Me2b

```
=====
Acq. Operator   : SYSTEM                      Seq. Line : 13
Acq. Instrument : Biggie                     Location  : Vial 90
Injection Date  : 12/9/2016 7:27:26 AM      Inj       : 1
                                           Inj Volume: 5.000 µl

Acq. Method    : C:\CHEM32\2\DATA\GHL\DEF_LC 2016-12-09 02-52-45\5IPA30-AS.M
Last changed   : 12/9/2016 2:52:45 AM by SYSTEM
Analysis Method: C:\CHEM32\2\DATA\GHL\DEF_LC 2016-12-09 02-52-45\5IPA30-AS.M (Sequence
Method)
Last changed   : 7/12/2017 9:57:31 AM by SYSTEM
               : (modified after loading)
Method Info    : 5% IPA in hexanes, 30 min, AS-H, 1.0 mL/min
=====
```

Additional Info : Peak(s) manually integrated

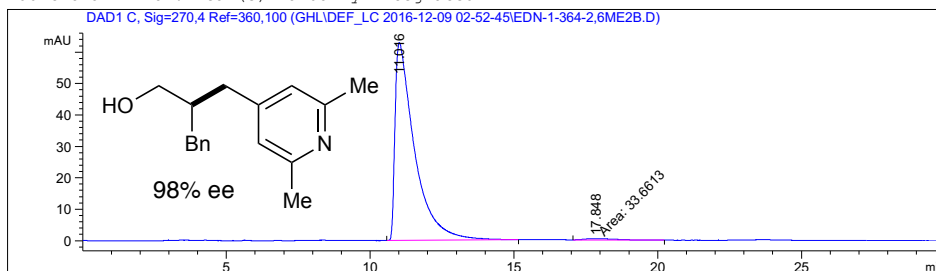

=====  
Area Percent Report  
=====

```
Sorted By      : Signal
Multiplier     : 1.0000
Dilution       : 1.0000
Do not use Multiplier & Dilution Factor with ISTDs
```

Signal 1: DAD1 C, Sig=270,4 Ref=360,100

| Peak # | RetTime [min] | Type | Width [min] | Area [mAU*s] | Height [mAU] | Area %  |
|--------|---------------|------|-------------|--------------|--------------|---------|
| 1      | 11.016        | BB   | 0.6868      | 2970.12012   | 62.90646     | 98.8794 |
| 2      | 17.848        | MM   | 1.2885      | 33.66129     | 4.35401e-1   | 1.1206  |

Totals : 3003.78140 63.34186

=====  
\*\*\* End of Report \*\*\*

Data File C:\CHEM32\2\DATA\GHL\DEF\_LC 2016-12-08 21-03-55\EDN-1-363-2,6ME2.D  
Sample Name: EDN-1-363-2,6Me2

```
=====
Acq. Operator   : SYSTEM                      Seq. Line :   14
Acq. Instrument : Biggie                      Location  : Vial 87
Injection Date  : 12/9/2016 12:23:18 AM      Inj       :    1
                                           Inj Volume: 5.000 µl

Acq. Method     : C:\CHEM32\2\DATA\GHL\DEF_LC 2016-12-08 21-03-55\5IPA30-AS.M
Last changed    : 12/8/2016 10:17:18 PM by SYSTEM
Analysis Method : C:\CHEM32\2\DATA\GHL\DEF_LC 2016-12-08 21-03-55\5IPA30-AS.M (Sequence
Method)
Last changed    : 7/12/2017 9:57:52 AM by SYSTEM
                : (modified after loading)
Method Info     : 5% IPA in hexanes, 30 min, AS-H, 1.0 mL/min
=====
```

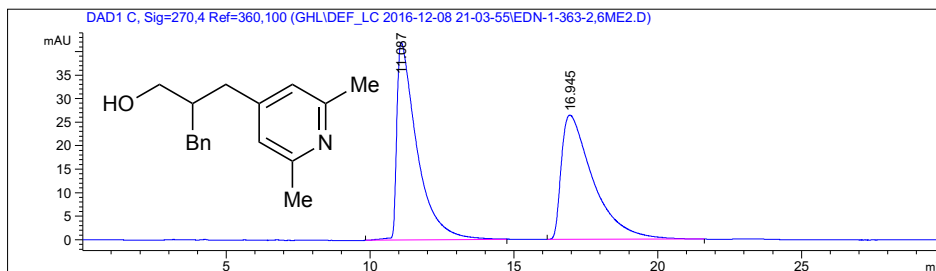

=====  
Area Percent Report  
=====

```
Sorted By      :      Signal
Multiplier     :      1.0000
Dilution       :      1.0000
Do not use Multiplier & Dilution Factor with ISTDs
```

Signal 1: DAD1 C, Sig=270,4 Ref=360,100

| Peak # | RetTime [min] | Type | Width [min] | Area [mAU*s] | Height [mAU] | Area %  |
|--------|---------------|------|-------------|--------------|--------------|---------|
| 1      | 11.087        | BB   | 0.7178      | 2043.13818   | 41.97878     | 50.1474 |
| 2      | 16.945        | BB   | 1.0885      | 2031.12744   | 26.43368     | 49.8526 |

Totals :                    4074.26563    68.41246

=====  
\*\*\* End of Report \*\*\*

Data File C:\CHEM32\2\DATA\CCL\DEF\_LC 2016-12-03 14-58-40\EDN-1-362-PH.D  
Sample Name: EDN-1-362-Ph

```
=====
Acq. Operator   : SYSTEM                      Seq. Line : 26
Acq. Instrument : Biggie                     Location  : Vial 86
Injection Date  : 12/3/2016 10:28:15 PM      Inj       : 1
                                           Inj Volume: 5.000 µl

Acq. Method     : C:\CHEM32\2\DATA\CCL\DEF_LC 2016-12-03 14-58-40\8ETOH25-AD.M
Last changed    : 12/3/2016 9:11:17 PM by SYSTEM
Analysis Method : C:\CHEM32\2\DATA\CCL\DEF_LC 2016-12-03 14-58-40\8ETOH25-AD.M (Sequence
Method)
Last changed    : 7/12/2017 9:53:41 AM by SYSTEM
                (modified after loading)
Method Info     : 8% EtOH in hexanes, 25 min, AD-H, 1.0 mL/min
=====
```

Additional Info : Peak(s) manually integrated

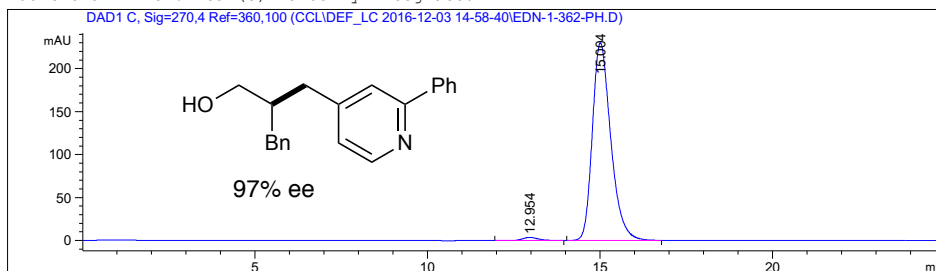

=====  
Area Percent Report  
=====

```
Sorted By      : Signal
Multiplier     : 1.0000
Dilution       : 1.0000
Do not use Multiplier & Dilution Factor with ISTDs
```

Signal 1: DAD1 C, Sig=270,4 Ref=360,100

| Peak # | RetTime [min] | Type | Width [min] | Area [mAU*s] | Height [mAU] | Area %  |
|--------|---------------|------|-------------|--------------|--------------|---------|
| 1      | 12.954        | BB   | 0.4866      | 114.90949    | 3.61692      | 1.3306  |
| 2      | 15.004        | BB   | 0.5683      | 8520.85449   | 229.93300    | 98.6694 |

Totals : 8635.76398 233.54992

=====  
\*\*\* End of Report \*\*\*



Data File C:\CHEM32\2\DATA\CCL\DEF\_LC 2016-12-03 14-58-40\EDN-1-361-PHB.D  
Sample Name: EDN-1-361-Phb

```
=====
Acq. Operator   : SYSTEM                      Seq. Line : 25
Acq. Instrument : Biggie                     Location  : Vial 84
Injection Date  : 12/3/2016 10:01:45 PM      Inj       : 1
                                           Inj Volume: 5.000 µl

Acq. Method     : C:\CHEM32\2\DATA\CCL\DEF_LC 2016-12-03 14-58-40\8ETOH25-AD.M
Last changed    : 12/3/2016 9:11:17 PM by SYSTEM
Analysis Method : C:\CHEM32\2\DATA\CCL\DEF_LC 2016-12-03 14-58-40\8ETOH25-AD.M (Sequence
Method)
Last changed    : 7/12/2017 9:53:41 AM by SYSTEM
                 (modified after loading)
Method Info     : 8% EtOH in hexanes, 25 min, AD-H, 1.0 mL/min
=====
```

Additional Info : Peak(s) manually integrated

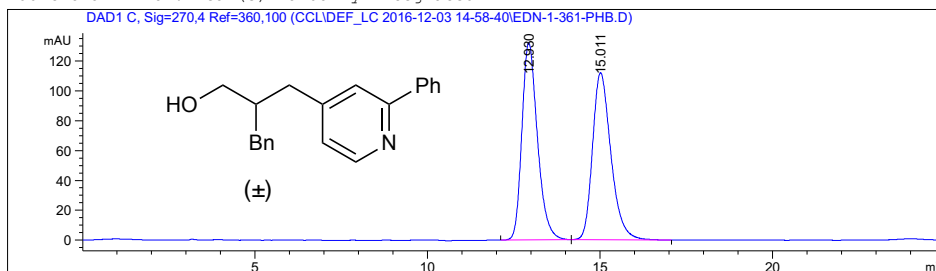

=====  
Area Percent Report  
=====

```
Sorted By      : Signal
Multiplier     : 1.0000
Dilution       : 1.0000
Do not use Multiplier & Dilution Factor with ISTDs
```

Signal 1: DAD1 C, Sig=270,4 Ref=360,100

| Peak # | RetTime [min] | Type | Width [min] | Area [mAU*s] | Height [mAU] | Area %  |
|--------|---------------|------|-------------|--------------|--------------|---------|
| 1      | 12.930        | BB   | 0.4816      | 4134.17578   | 131.90829    | 49.9506 |
| 2      | 15.011        | BB   | 0.5665      | 4142.35010   | 111.74736    | 50.0494 |

Totals : 8276.52588 243.65565

=====  
\*\*\* End of Report \*\*\*

Data File C:\CHEM32\2\DATA\EDN\DEF\_LC 2017-07-11 08-28-13\EDN-1-361B.D  
Sample Name: EDN-1-361b

```
=====
Acq. Operator   : SYSTEM                      Seq. Line : 23
Acq. Instrument : Biggie                     Location  : Vial 57
Injection Date  : 7/11/2017 6:39:10 PM      Inj       : 1
                                           Inj Volume: 5.000 µl

Acq. Method    : C:\CHEM32\2\DATA\EDN\DEF_LC 2017-07-11 08-28-13\5ETOH30-AS.M
Last changed   : 7/11/2017 8:28:14 AM by SYSTEM
Analysis Method : C:\CHEM32\2\DATA\EDN\DEF_LC 2017-07-11 08-28-13\5ETOH30-AS.M (Sequence
Method)
Last changed   : 7/12/2017 9:01:00 AM by SYSTEM
                (modified after loading)
Method Info    : 5% EtOH in hexanes, 30 min, AS-H, 1.0 mL/min
=====
```

Additional Info : Peak(s) manually integrated

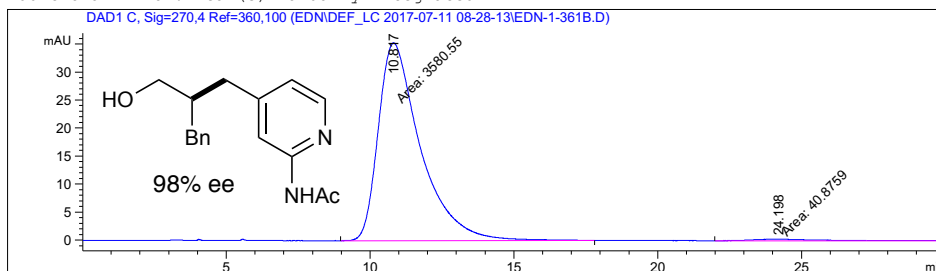

Area Percent Report

```
Sorted By      : Signal
Multiplier     : 1.0000
Dilution       : 1.0000
Do not use Multiplier & Dilution Factor with ISTDs
```

Signal 1: DAD1 C, Sig=270,4 Ref=360,100

| Peak # | RetTime [min] | Type | Width [min] | Area [mAU*s] | Height [mAU] | Area %  |
|--------|---------------|------|-------------|--------------|--------------|---------|
| 1      | 10.817        | MM   | 1.6911      | 3580.54932   | 35.28786     | 98.8713 |
| 2      | 24.198        | MM   | 2.5231      | 40.87590     | 2.70012e-1   | 1.1287  |

Totals : 3621.42522 35.55788

\*\*\* End of Report \*\*\*



Data File C:\CHEM32\2\DATA\EDN\DEF\_LC 2016-11-05 14-26-05\EDN-1-348-3ME.D  
Sample Name: edn-1-348-3Me

```
=====
Acq. Operator   : SYSTEM                               Seq. Line :    7
Acq. Instrument : Biggie                               Location  : Vial 12
Injection Date  : 11/5/2016 4:53:52 PM                Inj       :    1
                                                    Inj Volume: 5.000 µl

Acq. Method     : C:\CHEM32\2\DATA\EDN\DEF_LC 2016-11-05 14-26-05\10ETOH20-AD.M
Last changed    : 11/5/2016 4:41:28 PM by SYSTEM
Analysis Method : C:\CHEM32\2\DATA\EDN\DEF_LC 2016-11-05 14-26-05\10ETOH20-AD.M (Sequence
Method)
Last changed    : 7/12/2017 8:47:48 AM by SYSTEM
Method Info     : 10% EtOH in hexanes, 20 min, AD-H, 1.0 mL/min
=====
```

Additional Info : Peak(s) manually integrated

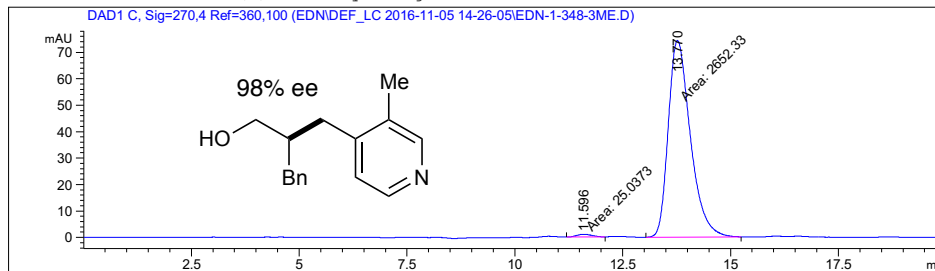

Area Percent Report

```
Sorted By      :      Signal
Multiplier     :      1.0000
Dilution       :      1.0000
Do not use Multiplier & Dilution Factor with ISTDs
```

Signal 1: DAD1 C, Sig=270,4 Ref=360,100

| Peak # | RetTime [min] | Type | Width [min] | Area [mAU*s] | Height [mAU] | Area %  |
|--------|---------------|------|-------------|--------------|--------------|---------|
| 1      | 11.596        | MM   | 0.4103      | 25.03733     | 1.01697      | 0.9351  |
| 2      | 13.770        | MM   | 0.5945      | 2652.33374   | 74.35678     | 99.0649 |

Totals : 2677.37107 75.37375

\*\*\* End of Report \*\*\*

Data File C:\CHEM32\2\DATA\EDN\DEF\_LC 2016-11-05 14-26-05\EDN-1-347-3ME-10ETOHADB.D  
Sample Name: edn-1-347-3Me-10EtOHADB

```
=====
Acq. Operator   : SYSTEM                      Seq. Line :    6
Acq. Instrument : Biggie                     Location  : Vial 11
Injection Date  : 11/5/2016 4:22:24 PM      Inj       :    1
                                           Inj Volume: 5.000 µl

Acq. Method     : C:\CHEM32\2\DATA\EDN\DEF_LC 2016-11-05 14-26-05\10ETOH30-AD.M
Last changed    : 11/5/2016 2:26:06 PM by SYSTEM
Analysis Method : C:\CHEM32\2\DATA\EDN\DEF_LC 2016-11-05 14-26-05\10ETOH30-AD.M (Sequence
Method)
Last changed    : 7/12/2017 9:31:21 AM by SYSTEM
                 (modified after loading)
Method Info     : 10% EtOH in hexanes, 30 min, AD-H, 1.0 mL/min
=====
```

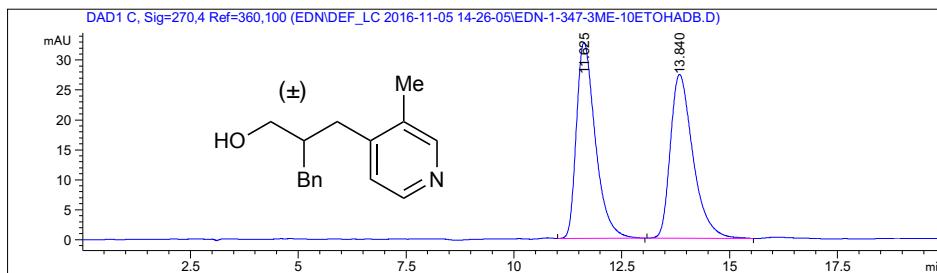

=====  
Area Percent Report  
=====

```
Sorted By      :      Signal
Multiplier     :      1.0000
Dilution       :      1.0000
Do not use Multiplier & Dilution Factor with ISTDs
```

Signal 1: DAD1 C, Sig=270,4 Ref=360,100

| Peak # | RetTime [min] | Type | Width [min] | Area [mAU*s] | Height [mAU] | Area %  |
|--------|---------------|------|-------------|--------------|--------------|---------|
| 1      | 11.625        | BB   | 0.4679      | 997.85852    | 32.70863     | 50.0478 |
| 2      | 13.840        | BB   | 0.5588      | 995.95441    | 27.35552     | 49.9522 |

Totals :                    1993.81293    60.06415

=====  
\*\*\* End of Report \*\*\*

Data File C:\CHEM32\2\DATA\EDN\DEF\_LC 2017-07-11 08-28-13\EDN-1-360B.D  
Sample Name: EDN-1-360b

```
=====
Acq. Operator   : SYSTEM                      Seq. Line : 20
Acq. Instrument : Biggie                      Location  : Vial 56
Injection Date  : 7/11/2017 5:04:29 PM       Inj       : 1
                                           Inj Volume: 5.000 µl

Acq. Method     : C:\CHEM32\2\DATA\EDN\DEF_LC 2017-07-11 08-28-13\5ETOH30-AS.M
Last changed    : 7/11/2017 8:28:14 AM by SYSTEM
Analysis Method : C:\CHEM32\2\DATA\EDN\DEF_LC 2017-07-11 08-28-13\5ETOH30-AS.M (Sequence
Method)
Last changed    : 7/12/2017 9:01:00 AM by SYSTEM
(modified after loading)
Method Info     : 5% EtOH in hexanes, 30 min, AS-H, 1.0 mL/min
=====
```

Additional Info : Peak(s) manually integrated

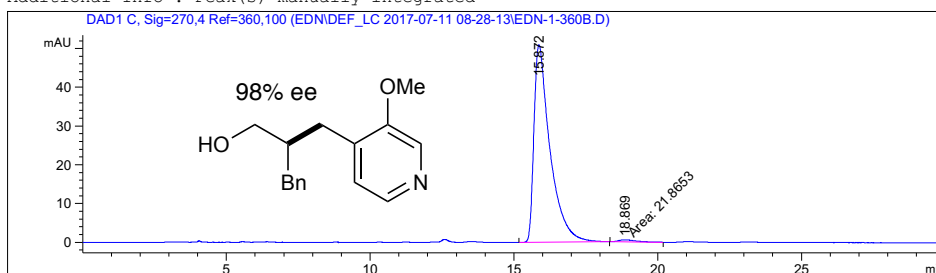

=====  
Area Percent Report  
=====

```
Sorted By      : Signal
Multiplier     : 1.0000
Dilution       : 1.0000
Do not use Multiplier & Dilution Factor with ISTDs
```

Signal 1: DAD1 C, Sig=270,4 Ref=360,100

| Peak # | RetTime [min] | Type | Width [min] | Area [mAU*s] | Height [mAU] | Area %  |
|--------|---------------|------|-------------|--------------|--------------|---------|
| 1      | 15.872        | BB   | 0.5603      | 1975.66357   | 50.95513     | 98.9054 |
| 2      | 18.869        | MM   | 0.6788      | 21.86530     | 5.36884e-1   | 1.0946  |

Totals : 1997.52887 51.49201

=====  
\*\*\* End of Report \*\*\*

Data File C:\CHEM32\2\DATA\EDN\DEF\_LC 2017-07-11 08-28-13\EDN-1-359B.D  
Sample Name: EDN-1-359b

```
=====
Acq. Operator   : SYSTEM                      Seq. Line :   19
Acq. Instrument : Biggie                     Location  : Vial 55
Injection Date  : 7/11/2017 4:32:56 PM      Inj       :    1
                                           Inj Volume: 5.000 µl

Acq. Method     : C:\CHEM32\2\DATA\EDN\DEF_LC 2017-07-11 08-28-13\5ETOH30-AS.M
Last changed    : 7/11/2017 8:28:14 AM by SYSTEM
Analysis Method : C:\CHEM32\2\DATA\EDN\DEF_LC 2017-07-11 08-28-13\5ETOH30-AS.M (Sequence
Method)
Last changed    : 7/12/2017 9:01:00 AM by SYSTEM
                 (modified after loading)
Method Info     : 5% EtOH in hexanes, 30 min, AS-H, 1.0 mL/min
=====
```

Additional Info : Peak(s) manually integrated

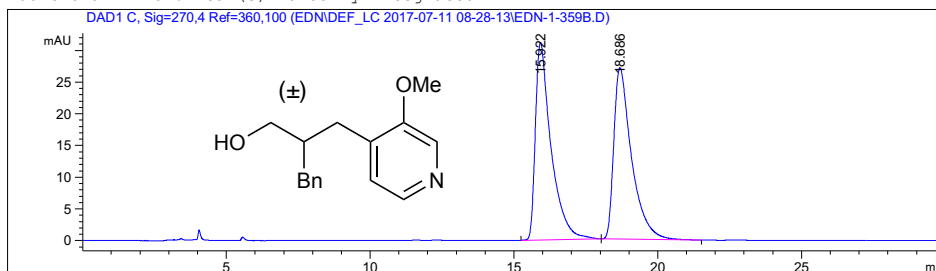

=====  
Area Percent Report  
=====

```
Sorted By      :      Signal
Multiplier     :      1.0000
Dilution       :      1.0000
Do not use Multiplier & Dilution Factor with ISTDs
```

Signal 1: DAD1 C, Sig=270,4 Ref=360,100

| Peak # | RetTime [min] | Type | Width [min] | Area [mAU*s] | Height [mAU] | Area %  |
|--------|---------------|------|-------------|--------------|--------------|---------|
| 1      | 15.922        | BB   | 0.5479      | 1177.77258   | 31.09594     | 50.3679 |
| 2      | 18.686        | BB   | 0.6285      | 1160.56653   | 27.05550     | 49.6321 |

Totals :                    2338.33911   58.15144

=====  
\*\*\* End of Report \*\*\*

Data File C:\CHEM32\2\DATA\EDN\DEF\_LC 2016-11-15 13-22-54\EDN-1-351-F.D  
Sample Name: EDN-1-351-F

```
=====
Acq. Operator   : SYSTEM                      Seq. Line :    3
Acq. Instrument : Biggie                     Location  : Vial 63
Injection Date  : 11/15/2016 1:56:21 PM      Inj       :    1
                                           Inj Volume: 5.000 µl

Acq. Method     : C:\CHEM32\2\DATA\EDN\DEF_LC 2016-11-15 13-22-54\10IPA20-AS.M
Last changed    : 11/15/2016 1:22:55 PM by SYSTEM
Analysis Method : C:\CHEM32\2\DATA\EDN\DEF_LC 2016-11-15 13-22-54\10IPA20-AS.M (Sequence
Method)
Last changed    : 7/12/2017 9:35:59 AM by SYSTEM
                 (modified after loading)
Method Info     : 10% IPA in hexanes, 20 min, AS-H, 1.0 mL/min
=====
```

Additional Info : Peak(s) manually integrated

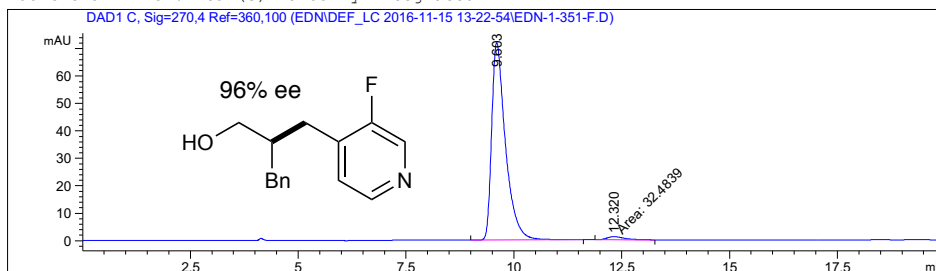

=====  
Area Percent Report  
=====

```
Sorted By      :      Signal
Multiplier     :      1.0000
Dilution       :      1.0000
Do not use Multiplier & Dilution Factor with ISTDs
```

Signal 1: DAD1 C, Sig=270,4 Ref=360,100

| Peak # | RetTime [min] | Type | Width [min] | Area [mAU*s] | Height [mAU] | Area %  |
|--------|---------------|------|-------------|--------------|--------------|---------|
| 1      | 9.603         | BB   | 0.3297      | 1599.65784   | 71.85580     | 98.0097 |
| 2      | 12.320        | MM   | 0.4599      | 32.48386     | 1.17729      | 1.9903  |

Totals : 1632.14169 73.03308

=====  
\*\*\* End of Report \*\*\*



Data File C:\CHEM32\2\DATA\SA\DEF\_LC 2017-01-11 09-13-36\EDN-1-383B.D  
Sample Name: EDN-1-383b

```
=====
Acq. Operator   : SYSTEM                      Seq. Line :    9
Acq. Instrument : Biggie                      Location  : Vial 14
Injection Date  : 1/11/2017 11:53:05 AM      Inj       :    1
                                           Inj Volume: 5.000 µl

Acq. Method     : C:\CHEM32\2\DATA\SA\DEF_LC 2017-01-11 09-13-36\10IPA20-AS.M
Last changed    : 1/11/2017 9:30:27 AM by SYSTEM
Analysis Method : C:\CHEM32\2\DATA\SA\DEF_LC 2017-01-11 09-13-36\10IPA20-AS.M (Sequence
Method)
Last changed    : 7/12/2017 10:19:57 AM by SYSTEM
(modified after loading)
Method Info     : 10% IPA in hexanes, 20 min, AS-H, 1.0 mL/min
=====
```

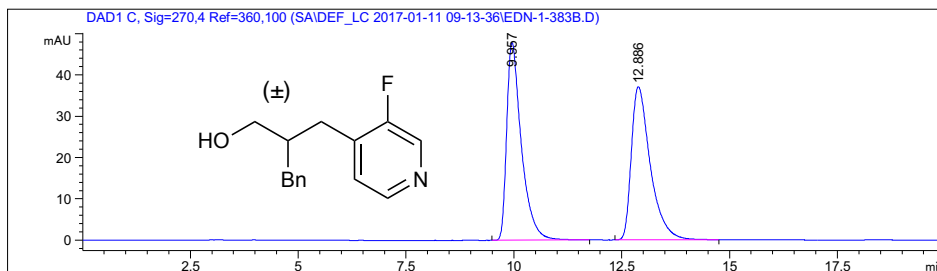

=====  
Area Percent Report  
=====

```
Sorted By      :      Signal
Multiplier     :      1.0000
Dilution       :      1.0000
Do not use Multiplier & Dilution Factor with ISTDs
```

Signal 1: DAD1 C, Sig=270,4 Ref=360,100

| Peak # | RetTime [min] | Type | Width [min] | Area [mAU*s] | Height [mAU] | Area %  |
|--------|---------------|------|-------------|--------------|--------------|---------|
| 1      | 9.957         | BB   | 0.3498      | 1131.47546   | 47.87123     | 49.9472 |
| 2      | 12.886        | BB   | 0.4648      | 1133.86938   | 37.07629     | 50.0528 |

Totals :                    2265.34485    84.94752

=====  
\*\*\* End of Report \*\*\*

Data File C:\CHEM32\2\DATA\EDN\DEF\_LC 2016-11-15 15-05-16\EDN-1-351-CLACTUALB.D  
Sample Name: EDN-1-351-Clactualb

```
=====
Acq. Operator   : SYSTEM                      Seq. Line :    3
Acq. Instrument : Biggie                     Location  : Vial 64
Injection Date  : 11/15/2016 3:38:45 PM      Inj       :    1
                                           Inj Volume: 5.000 µl

Acq. Method     : C:\CHEM32\2\DATA\EDN\DEF_LC 2016-11-15 15-05-16\10IPA20-AS.M
Last changed    : 11/15/2016 3:05:16 PM by SYSTEM
Analysis Method : C:\CHEM32\2\DATA\EDN\DEF_LC 2016-11-15 15-05-16\10IPA20-AS.M (Sequence
Method)
Last changed    : 7/12/2017 9:42:17 AM by SYSTEM
                 (modified after loading)
Method Info     : 10% IPA in hexanes, 20 min, AS-H, 1.0 mL/min
=====
```

Additional Info : Peak(s) manually integrated

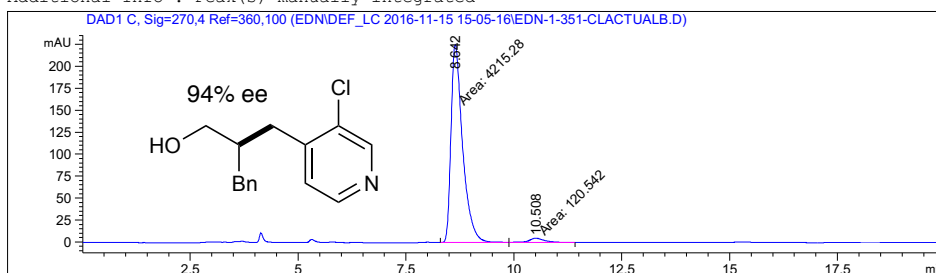

Area Percent Report

```
=====
Sorted By      :      Signal
Multiplier     :      1.0000
Dilution       :      1.0000
Do not use Multiplier & Dilution Factor with ISTDs
=====
```

Signal 1: DAD1 C, Sig=270,4 Ref=360,100

| Peak # | RetTime [min] | Type | Width [min] | Area [mAU*s] | Height [mAU] | Area %  |
|--------|---------------|------|-------------|--------------|--------------|---------|
| 1      | 8.642         | MM   | 0.3120      | 4215.27881   | 225.15773    | 97.2199 |
| 2      | 10.508        | MM   | 0.4165      | 120.54182    | 4.82378      | 2.7801  |

Totals : 4335.82063 229.98151

\*\*\* End of Report \*\*\*

```
=====
Acq. Operator   : SYSTEM                               Seq. Line :   27
Acq. Instrument : Biggie                               Location  : Vial 13
Injection Date  : 1/10/2017 12:13:03 AM              Inj       :    1
                                                    Inj Volume: 5.000 µl

Acq. Method    : C:\CHEM32\2\DATA\SA\DEF_LC 2017-01-09 12-51-04\10IPA20-AS.M
Last changed   : 1/9/2017 9:30:07 PM by SYSTEM
Analysis Method: C:\CHEM32\2\DATA\SA\DEF_LC 2017-01-09 12-51-04\10IPA20-AS.M (Sequence
Method)
Last changed   : 7/12/2017 10:21:34 AM by SYSTEM
                (modified after loading)
Method Info    : 10% IPA in hexanes, 20 min, AS-H, 1.0 mL/min
=====
```

Additional Info : Peak(s) manually integrated

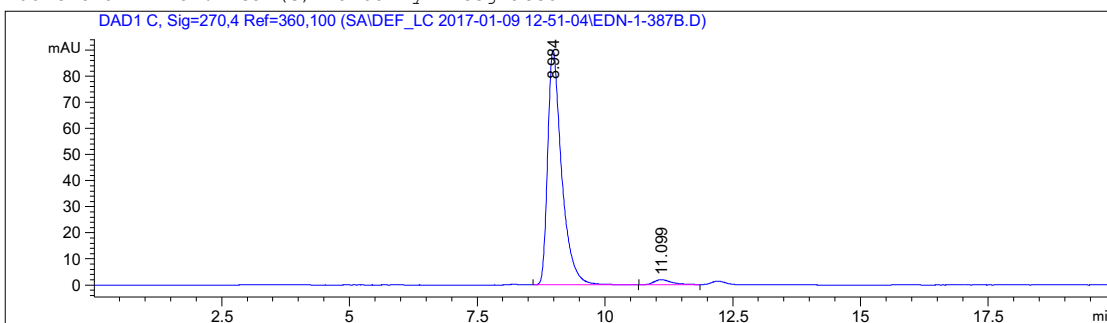

```
=====
                          Area Percent Report
=====
```

```
Sorted By      :      Signal
Multiplier     :      1.0000
Dilution       :      1.0000
Do not use Multiplier & Dilution Factor with ISTDs
```

Signal 1: DAD1 C, Sig=270,4 Ref=360,100

| Peak # | RetTime [min] | Type | Width [min] | Area [mAU*s] | Height [mAU] | Area %  |
|--------|---------------|------|-------------|--------------|--------------|---------|
| 1      | 8.984         | BB   | 0.2821      | 1709.11560   | 89.76730     | 97.3467 |
| 2      | 11.099        | BB   | 0.3589      | 46.58413     | 1.93502      | 2.6533  |

Totals :                    1755.69973    91.70231

```
=====
*** End of Report ***
=====
```

Data File C:\CHEM32\2\DATA\EDN\DEF\_LC 2017-01-16 18-52-38\EDN-1-391B.D  
Sample Name: EDN-1-391b

```
=====
Acq. Operator   : SYSTEM                      Seq. Line :    3
Acq. Instrument : Biggie                     Location  : Vial 20
Injection Date  : 1/16/2017 7:26:23 PM      Inj       :    1
                                           Inj Volume: 5.000 µl
Acq. Method     : C:\CHEM32\2\DATA\EDN\DEF_LC 2017-01-16 18-52-38\10IPA20-AS.M
Last changed    : 1/16/2017 6:52:38 PM by SYSTEM
Analysis Method : C:\CHEM32\2\DATA\EDN\DEF_LC 2017-01-16 18-52-38\10IPA20-AS.M (Sequence
Method)
Last changed    : 7/12/2017 10:25:45 AM by SYSTEM
                 (modified after loading)
Method Info     : 10% IPA in hexanes, 20 min, AS-H, 1.0 mL/min
=====
```

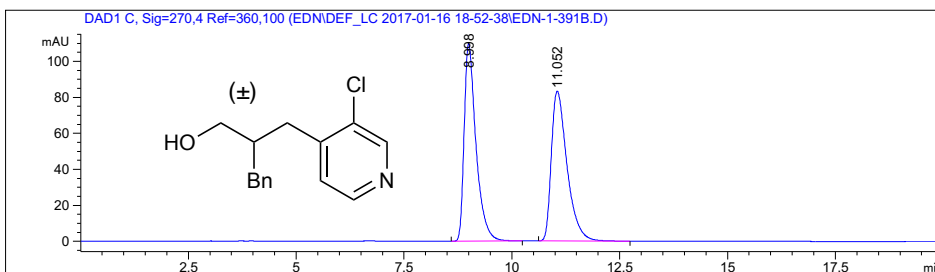

=====  
Area Percent Report  
=====

Sorted By : Signal  
Multiplier : 1.0000  
Dilution : 1.0000  
Do not use Multiplier & Dilution Factor with ISTDs

Signal 1: DAD1 C, Sig=270,4 Ref=360,100

| Peak # | RetTime [min] | Type | Width [min] | Area [mAU*s] | Height [mAU] | Area %  |
|--------|---------------|------|-------------|--------------|--------------|---------|
| 1      | 8.998         | BB   | 0.2842      | 2091.03931   | 109.80045    | 49.8511 |
| 2      | 11.052        | BB   | 0.3849      | 2103.53320   | 83.23116     | 50.1489 |

Totals : 4194.57251 193.03160

=====  
\*\*\* End of Report \*\*\*

Data File C:\CHEM32\2\DATA\EDN\DEF\_LC 2016-11-10 11-40-56\EDN-1-349B.D  
Sample Name: EDN-1-349b

```
=====
Acq. Operator   : SYSTEM                      Seq. Line :    3
Acq. Instrument : Biggie                     Location  : Vial 91
Injection Date  : 11/10/2016 12:14:13 PM     Inj       :    1
                                           Inj Volume: 5.000 µl

Acq. Method    : C:\CHEM32\2\DATA\EDN\DEF_LC 2016-11-10 11-40-56\10IPA20-AS.M
Last changed   : 11/10/2016 11:40:56 AM by SYSTEM
Analysis Method: C:\CHEM32\2\DATA\EDN\DEF_LC 2016-11-10 11-40-56\10IPA20-AS.M (Sequence
Method)
Last changed   : 7/12/2017 10:01:25 AM by SYSTEM
                (modified after loading)
Method Info    : 10% IPA in hexanes, 20 min, AS-H, 1.0 mL/min
=====
```

Additional Info : Peak(s) manually integrated

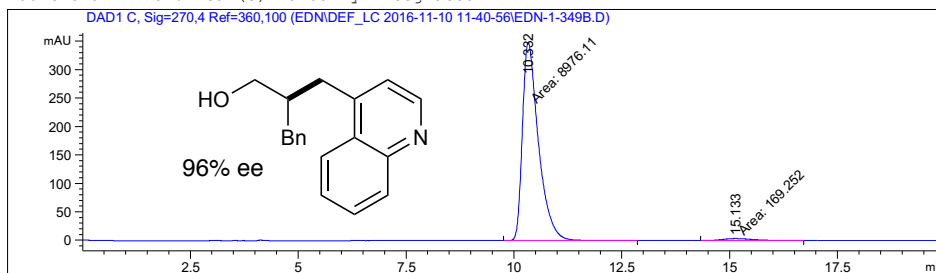

=====  
Area Percent Report  
=====

```
Sorted By      :      Signal
Multiplier     :      1.0000
Dilution       :      1.0000
Do not use Multiplier & Dilution Factor with ISTDs
```

Signal 1: DAD1 C, Sig=270,4 Ref=360,100

| Peak # | RetTime [min] | Type | Width [min] | Area [mAU*s] | Height [mAU] | Area %  |
|--------|---------------|------|-------------|--------------|--------------|---------|
| 1      | 10.332        | MM   | 0.4303      | 8976.10938   | 347.65024    | 98.1493 |
| 2      | 15.133        | MM   | 0.7986      | 169.25209    | 3.53217      | 1.8507  |

Totals : 9145.36147 351.18241

=====  
\*\*\* End of Report \*\*\*

Data File C:\CHEM32\2\DATA\EDN\DEF\_LC 2016-11-06 12-04-55\EDN-1-347-QUIN-10IPAASC.D  
Sample Name: edn-1-347-quin-10IPAASc

```
=====
Acq. Operator   : SYSTEM                      Seq. Line :    4
Acq. Instrument : Biggie                     Location  : Vial 13
Injection Date  : 11/6/2016 12:59:53 PM      Inj       :    1
                                           Inj Volume: 5.000 µl

Acq. Method    : C:\CHEM32\2\DATA\EDN\DEF_LC 2016-11-06 12-04-55\10IPA20-AS.M
Last changed   : 11/6/2016 12:06:57 PM by SYSTEM
Analysis Method: C:\CHEM32\2\DATA\EDN\DEF_LC 2016-11-06 12-04-55\10IPA20-AS.M (Sequence
Method)
Last changed   : 7/12/2017 10:00:15 AM by SYSTEM
                (modified after loading)
Method Info    : 10% IPA in hexanes, 20 min, AS-H, 1.0 mL/min
=====
```

Additional Info : Peak(s) manually integrated

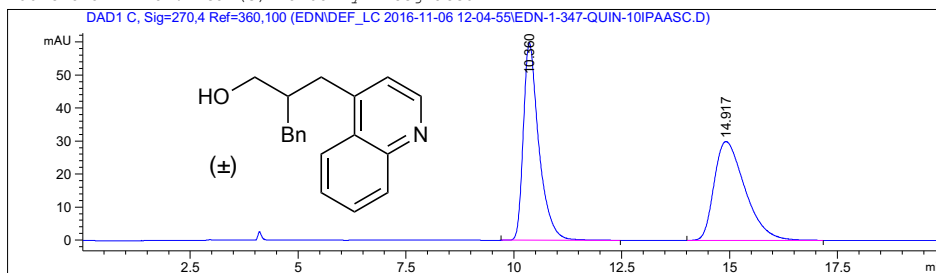

=====  
Area Percent Report  
=====

```
Sorted By      :      Signal
Multiplier     :      1.0000
Dilution       :      1.0000
Do not use Multiplier & Dilution Factor with ISTDs
```

Signal 1: DAD1 C, Sig=270,4 Ref=360,100

| Peak # | RetTime [min] | Type | Width [min] | Area [mAU*s] | Height [mAU] | Area %  |
|--------|---------------|------|-------------|--------------|--------------|---------|
| 1      | 10.360        | BB   | 0.3694      | 1493.40332   | 59.79351     | 50.1351 |
| 2      | 14.917        | BB   | 0.7653      | 1485.35425   | 29.91398     | 49.8649 |

Totals :                                    2978.75757    89.70749

=====  
\*\*\* End of Report \*\*\*

Data File C:\CHEM32\2\DATA\SET\DEF\_LC 2016-12-15 17-32-19\EDN-1-371-5IPA30ASB.D  
Sample Name: EDN-1-371-5IPA30ASb

=====

|                 |                          |                   |            |
|-----------------|--------------------------|-------------------|------------|
| Acq. Operator   | : SYSTEM                 | Seq. Line         | : 16       |
| Acq. Instrument | : Biggie                 | Location          | : Vial 84  |
| Injection Date  | : 12/15/2016 10:34:41 PM | Inj               | : 1        |
|                 |                          | Inj Volume        | : 5.000 µl |
|                 |                          | Actual Inj Volume | : 2.000 µl |

Different Inj Volume from Sample Entry!

|                 |                                                                                 |
|-----------------|---------------------------------------------------------------------------------|
| Acq. Method     | : C:\CHEM32\2\DATA\SET\DEF_LC 2016-12-15 17-32-19\5IPA30-AS.M                   |
| Last changed    | : 12/15/2016 8:21:34 PM by SYSTEM                                               |
| Analysis Method | : C:\CHEM32\2\DATA\SET\DEF_LC 2016-12-15 17-32-19\5IPA30-AS.M (Sequence Method) |
| Last changed    | : 7/12/2017 10:02:52 AM by SYSTEM<br>(modified after loading)                   |
| Method Info     | : 5% IPA in hexanes, 30 min, AS-H, 1.0 mL/min                                   |

Additional Info : Peak(s) manually integrated

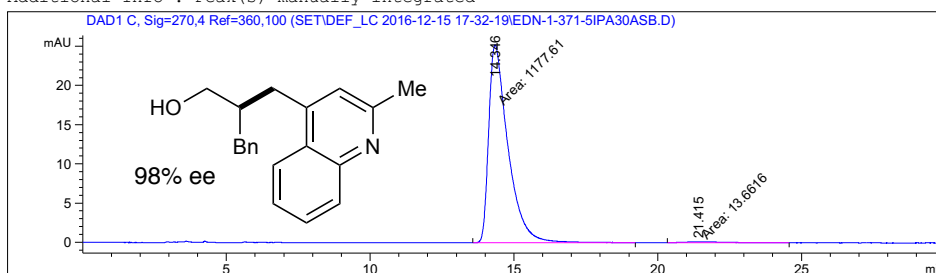

=====  
Area Percent Report  
=====

|            |   |        |
|------------|---|--------|
| Sorted By  | : | Signal |
| Multiplier | : | 1.0000 |
| Dilution   | : | 1.0000 |

Do not use Multiplier & Dilution Factor with ISTDs

Signal 1: DAD1 C, Sig=270,4 Ref=360,100

| Peak # | RetTime [min] | Type | Width [min] | Area [mAU*s] | Height [mAU] | Area %  |
|--------|---------------|------|-------------|--------------|--------------|---------|
| 1      | 14.346        | MM   | 0.7783      | 1177.60693   | 25.21682     | 98.8532 |
| 2      | 21.415        | MM   | 1.6567      | 13.66158     | 1.37440e-1   | 1.1468  |

Totals : 1191.26851 25.35426

=====  
\*\*\* End of Report \*\*\*





Data File C:\CHEM32\2\DATA\SET\DEF\_LC 2017-01-14 14-59-46\EDN-1-390B.D  
Sample Name: EDN-1-390b

```
=====
Acq. Operator   : SYSTEM                      Seq. Line :    6
Acq. Instrument : Biggie                     Location  : Vial 19
Injection Date  : 1/14/2017 4:59:05 PM      Inj       :    1
                                           Inj Volume: 5.000 µl

Acq. Method     : C:\CHEM32\2\DATA\SET\DEF_LC 2017-01-14 14-59-46\10IPA20-AS.M
Last changed    : 1/14/2017 3:13:07 PM by SYSTEM
Analysis Method : C:\CHEM32\2\DATA\SET\DEF_LC 2017-01-14 14-59-46\10IPA20-AS.M (Sequence
Method)
Last changed    : 7/12/2017 10:15:51 AM by SYSTEM
                 (modified after loading)
Method Info     : 10% IPA in hexanes, 20 min, AS-H, 1.0 mL/min
=====
```

Additional Info : Peak(s) manually integrated

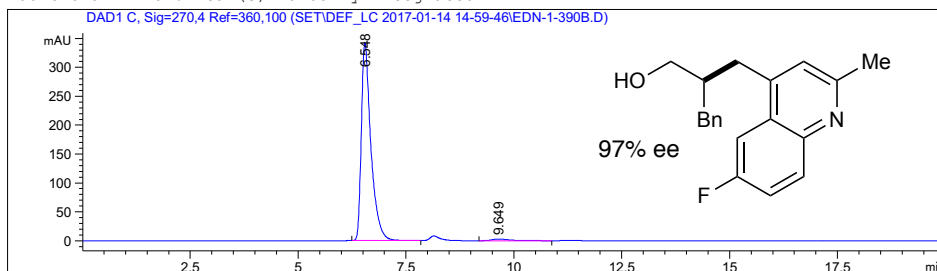

=====  
Area Percent Report  
=====

```
Sorted By      :      Signal
Multiplier     :      1.0000
Dilution       :      1.0000
Do not use Multiplier & Dilution Factor with ISTDs
```

Signal 1: DAD1 C, Sig=270,4 Ref=360,100

| Peak # | RetTime [min] | Type | Width [min] | Area [mAU*s] | Height [mAU] | Area %  |
|--------|---------------|------|-------------|--------------|--------------|---------|
| 1      | 6.548         | BB   | 0.2256      | 5271.37012   | 342.45544    | 98.4375 |
| 2      | 9.649         | BB   | 0.4158      | 83.67407     | 2.92436      | 1.5625  |

Totals : 5355.04419 345.37981

=====  
\*\*\* End of Report \*\*\*

Data File C:\CHEM32\2\DATA\EDN\DEF\_LC 2017-01-12 18-06-38\EDN-1-382-6F-10IPA20AS.D  
Sample Name: EDN-1-382-6F-10IPA20AS

```
=====
Acq. Operator   : SYSTEM                      Seq. Line :    4
Acq. Instrument : Biggie                     Location  : Vial 17
Injection Date  : 1/12/2017 7:02:23 PM      Inj       :    1
                                           Inj Volume: 5.000 µl

Acq. Method    : C:\CHEM32\2\DATA\EDN\DEF_LC 2017-01-12 18-06-38\10IPA20-AS.M
Last changed   : 1/12/2017 6:06:59 PM by SYSTEM
Analysis Method : C:\CHEM32\2\DATA\EDN\DEF_LC 2017-01-12 18-06-38\10IPA20-AS.M (Sequence
Method)
Last changed   : 7/12/2017 10:08:02 AM by SYSTEM
                (modified after loading)
Method Info    : 10% IPA in hexanes, 20 min, AS-H, 1.0 mL/min
=====
```

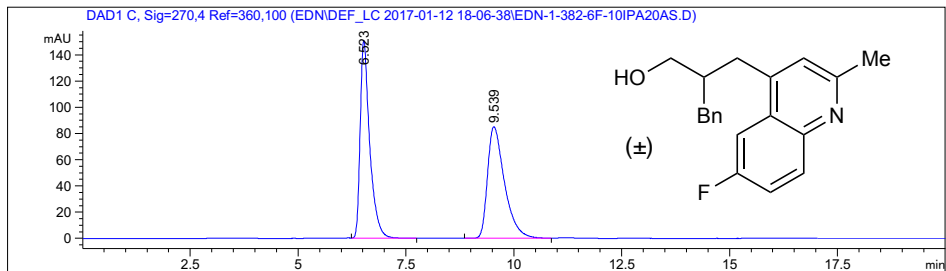

=====  
Area Percent Report  
=====

```
Sorted By      :      Signal
Multiplier     :      1.0000
Dilution       :      1.0000
Do not use Multiplier & Dilution Factor with ISTDs
```

Signal 1: DAD1 C, Sig=270,4 Ref=360,100

| Peak # | RetTime [min] | Type | Width [min] | Area [mAU*s] | Height [mAU] | Area %  |
|--------|---------------|------|-------------|--------------|--------------|---------|
| 1      | 6.523         | BB   | 0.2244      | 2305.33447   | 150.79849    | 49.8527 |
| 2      | 9.539         | BB   | 0.4099      | 2318.96045   | 85.10048     | 50.1473 |

Totals :                    4624.29492   235.89897

=====  
\*\*\* End of Report \*\*\*

Data File C:\CHEM32\2\DATA\EDN\DEF\_LC 2017-03-08 19-21-36\EDN-1-403REPUIFIEDB.D  
Sample Name: EDN-1-403repuifiedb

```
=====
Acq. Operator   : SYSTEM                      Seq. Line :    3
Acq. Instrument : Biggie                      Location  : Vial 35
Injection Date  : 3/8/2017 8:05:14 PM        Inj       :    1
                                           Inj Volume: 5.000 µl

Acq. Method     : C:\CHEM32\2\DATA\EDN\DEF_LC 2017-03-08 19-21-36\10IPA30-OD.M
Last changed    : 3/8/2017 7:21:36 PM by SYSTEM
Analysis Method : C:\CHEM32\2\DATA\EDN\DEF_LC 2017-03-08 19-21-36\10IPA30-OD.M (Sequence
Method)
Last changed    : 7/12/2017 10:39:13 AM by SYSTEM
                 (modified after loading)
Method Info     : 10% IPA in hexanes, 30 min, OD-H, 1.0 mL/min
=====
```

Additional Info : Peak(s) manually integrated

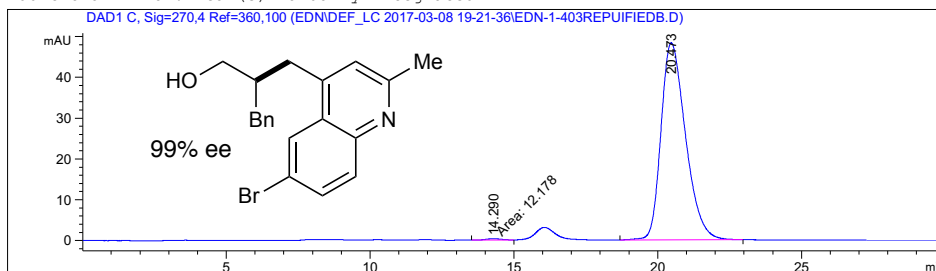

=====  
Area Percent Report  
=====

```
Sorted By      :      Signal
Multiplier     :      1.0000
Dilution       :      1.0000
Do not use Multiplier & Dilution Factor with ISTDs
```

Signal 1: DAD1 C, Sig=270,4 Ref=360,100

| Peak # | RetTime [min] | Type | Width [min] | Area [mAU*s] | Height [mAU] | Area %  |
|--------|---------------|------|-------------|--------------|--------------|---------|
| 1      | 14.290        | MM   | 0.6088      | 12.17799     | 3.33379e-1   | 0.4233  |
| 2      | 20.473        | BB   | 0.9061      | 2864.51660   | 48.28809     | 99.5767 |

Totals : 2876.69459 48.62147

=====  
\*\*\* End of Report \*\*\*

Data File C:\CHEM32\2\DATA\EDN\DEF\_LC 2017-03-07 19-02-15\EDN-1-401-ODb.D  
Sample Name: EDN-1-401-ODb

```
=====
Acq. Operator   : SYSTEM                      Seq. Line :    3
Acq. Instrument : Biggie                     Location  : Vial 34
Injection Date  : 3/7/2017 7:46:00 PM       Inj       :    1
                                           Inj Volume: 5.000 µl

Acq. Method     : C:\CHEM32\2\DATA\EDN\DEF_LC 2017-03-07 19-02-15\10IPA30-OD.M
Last changed    : 3/7/2017 7:02:15 PM by SYSTEM
Analysis Method : C:\CHEM32\2\DATA\EDN\DEF_LC 2017-03-07 19-02-15\10IPA30-OD.M (Sequence
Method)
Last changed    : 7/12/2017 10:38:06 AM by SYSTEM
                 (modified after loading)
Method Info     : 10% IPA in hexanes, 30 min, OD-H, 1.0 mL/min
=====
```

Additional Info : Peak(s) manually integrated

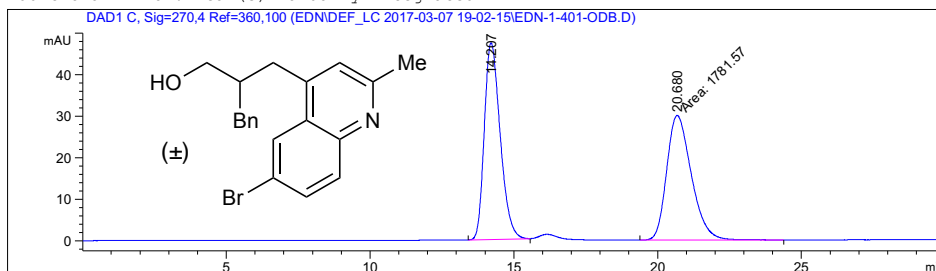

=====  
Area Percent Report  
=====

```
Sorted By      :      Signal
Multiplier     :      1.0000
Dilution       :      1.0000
Do not use Multiplier & Dilution Factor with ISTDs
```

Signal 1: DAD1 C, Sig=270,4 Ref=360,100

| Peak # | RetTime [min] | Type | Width [min] | Area [mAU*s] | Height [mAU] | Area %  |
|--------|---------------|------|-------------|--------------|--------------|---------|
| 1      | 14.207        | BB   | 0.5932      | 1814.00049   | 47.32883     | 50.4510 |
| 2      | 20.680        | MM   | 0.9900      | 1781.56921   | 29.99210     | 49.5490 |

Totals : 3595.56970 77.32092

=====  
\*\*\* End of Report \*\*\*

Data File C:\CHEM32\2\DATA\EDN\DEF\_LC 2017-03-03 17-24-17\EDN-1-414.D  
Sample Name: EDN-1-414

```
=====
Acq. Operator   : SYSTEM                      Seq. Line :    4
Acq. Instrument : Biggie                     Location  : Vial 22
Injection Date  : 3/3/2017 6:39:55 PM        Inj       :    1
                                           Inj Volume: 5.000 µl

Acq. Method     : C:\CHEM32\2\DATA\EDN\DEF_LC 2017-03-03 17-24-17\20IPA30-OD.M
Last changed    : 3/3/2017 5:24:17 PM by SYSTEM
Analysis Method : C:\CHEM32\2\DATA\EDN\DEF_LC 2017-03-03 17-24-17\20IPA30-OD.M (Sequence
Method)
Last changed    : 7/12/2017 10:41:17 AM by SYSTEM
                 (modified after loading)
Method Info     : 20% IPA in hexanes, 30 min, OD-H, 1.0 mL/min
=====
```

Additional Info : Peak(s) manually integrated

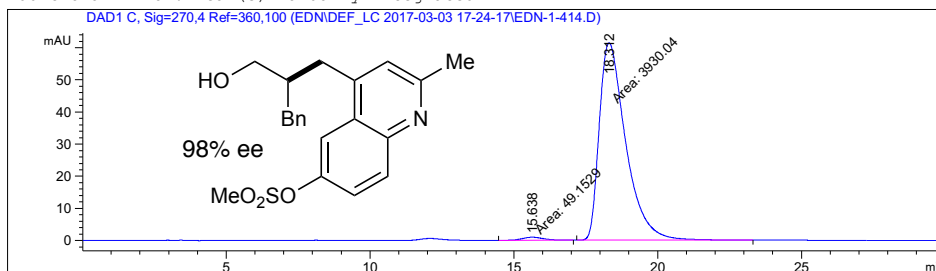

=====  
Area Percent Report  
=====

Sorted By : Signal  
Multiplier : 1.0000  
Dilution : 1.0000  
Do not use Multiplier & Dilution Factor with ISTDs

Signal 1: DAD1 C, Sig=270,4 Ref=360,100

| Peak # | RetTime [min] | Type | Width [min] | Area [mAU*s] | Height [mAU] | Area %  |
|--------|---------------|------|-------------|--------------|--------------|---------|
| 1      | 15.638        | MM   | 0.8563      | 49.15291     | 9.56688e-1   | 1.2352  |
| 2      | 18.312        | MM   | 1.0666      | 3930.04346   | 61.41174     | 98.7648 |

Totals : 3979.19637 62.36843

=====  
\*\*\* End of Report \*\*\*

Data File C:\CHEM32\2\DATA\EDN\DEF\_LC 2017-03-03 17-24-17\EDN-1-413B.D  
Sample Name: EDN-1-413b

```
=====
Acq. Operator   : SYSTEM                               Seq. Line :    3
Acq. Instrument : Biggie                               Location  : Vial 21
Injection Date  : 3/3/2017 6:08:24 PM                 Inj       :    1
                                                    Inj Volume: 5.000 µl
Different Inj Volume from Sample Entry! Actual Inj Volume : 2.000 µl
Acq. Method    : C:\CHEM32\2\DATA\EDN\DEF_LC 2017-03-03 17-24-17\20IPA30-OD.M
Last changed   : 3/3/2017 5:24:17 PM by SYSTEM
Analysis Method : C:\CHEM32\2\DATA\EDN\DEF_LC 2017-03-03 17-24-17\20IPA30-OD.M (Sequence
Method)
Last changed   : 7/12/2017 10:41:17 AM by SYSTEM
                (modified after loading)
Method Info    : 20% IPA in hexanes, 30 min, OD-H, 1.0 mL/min
=====
```

Additional Info : Peak(s) manually integrated

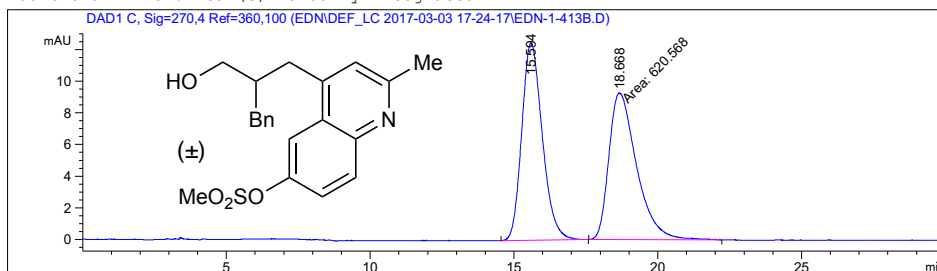

=====  
Area Percent Report  
=====

```
Sorted By      :      Signal
Multiplier     :      1.0000
Dilution       :      1.0000
Do not use Multiplier & Dilution Factor with ISTDs
```

Signal 1: DAD1 C, Sig=270,4 Ref=360,100

| Peak # | RetTime [min] | Type | Width [min] | Area [mAU*s] | Height [mAU] | Area %  |
|--------|---------------|------|-------------|--------------|--------------|---------|
| 1      | 15.594        | BB   | 0.7562      | 619.96552    | 12.46588     | 49.9757 |
| 2      | 18.668        | MM   | 1.1153      | 620.56769    | 9.27387      | 50.0243 |

Totals : 1240.53320 21.73976

=====  
\*\*\* End of Report \*\*\*

Data File C:\CHEM32\2\DATA\EDN\DEF\_LC 2017-02-16 11-11-25\EDN-1-403A.D  
Sample Name: edn-1-402A

```
=====
Acq. Operator   : SYSTEM                      Seq. Line :    2
Acq. Instrument : Biggie                      Location  : Vial 58
Injection Date  : 2/16/2017 11:23:44 AM      Inj       :    1
                                           Inj Volume: 5.000 µl
Different Inj Volume from Sample Entry! Actual Inj Volume : 10.000 µl
Acq. Method     : C:\CHEM32\2\DATA\EDN\DEF_LC 2017-02-16 11-11-25\10IPA10-AS.M
Last changed    : 2/16/2017 11:11:25 AM by SYSTEM
Analysis Method : C:\CHEM32\2\DATA\EDN\DEF_LC 2017-02-16 11-11-25\10IPA10-AS.M (Sequence
Method)
Last changed    : 7/12/2017 10:35:29 AM by SYSTEM
                 (modified after loading)
Method Info     : 10% IPA in hexanes, 10 min, AS-H, 1.0 mL/min
=====
```

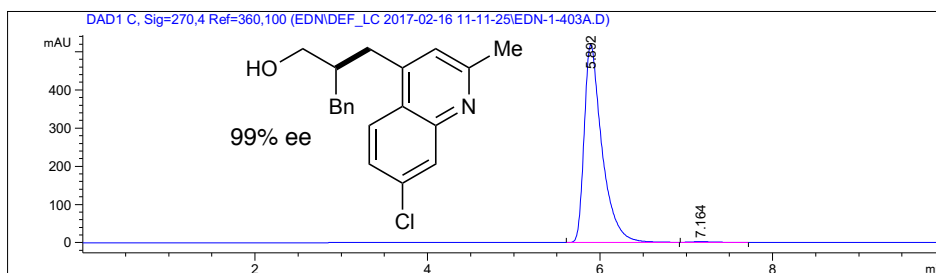

```
=====
                          Area Percent Report
=====
```

```
Sorted By       :      Signal
Multiplier      :      1.0000
Dilution        :      1.0000
Do not use Multiplier & Dilution Factor with ISTDs
```

Signal 1: DAD1 C, Sig=270,4 Ref=360,100

| Peak # | RetTime [min] | Type | Width [min] | Area [mAU*s] | Height [mAU] | Area %  |
|--------|---------------|------|-------------|--------------|--------------|---------|
| 1      | 5.892         | BB   | 0.2110      | 7416.41064   | 518.11096    | 99.5796 |
| 2      | 7.164         | BB   | 0.2725      | 31.31009     | 1.78599      | 0.4204  |

Totals :                                7447.72074    519.89695

```
=====
*** End of Report ***
=====
```

Data File C:\CHEM32\2\DATA\EDN\DEF\_LC 2017-02-01 18-48-29\EDN-1-399-CL-10IPA10-AS.D  
Sample Name: EDN-1-399-CL-10IPA10-AS

```
=====
Acq. Operator   : SYSTEM                      Seq. Line :    3
Acq. Instrument : Biggie                      Location  : Vial 55
Injection Date  : 2/1/2017 7:22:48 PM        Inj       :    1
                                           Inj Volume: 5.000 µl

Acq. Method    : C:\CHEM32\2\DATA\EDN\DEF_LC 2017-02-01 18-48-29\10IPA10-AS.M
Last changed   : 2/1/2017 7:10:34 PM by SYSTEM
Analysis Method : C:\CHEM32\2\DATA\EDN\DEF_LC 2017-02-01 18-48-29\10IPA10-AS.M (Sequence
Method)
Last changed   : 7/12/2017 10:33:13 AM by SYSTEM
                (modified after loading)
Method Info    : 10% IPA in hexanes, 10 min, AS-H, 1.0 mL/min
=====
```

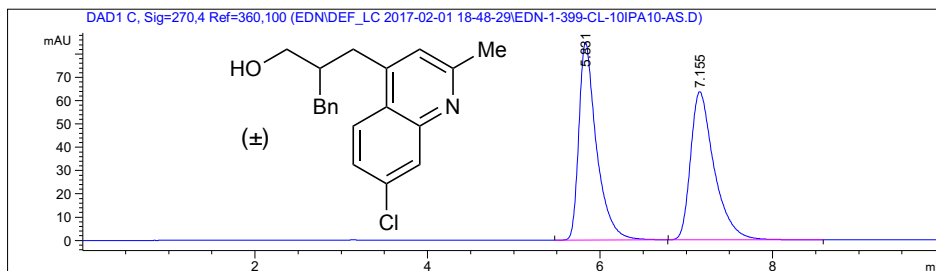

Area Percent Report

```
Sorted By      : Signal
Multiplier     : 1.0000
Dilution       : 1.0000
Do not use Multiplier & Dilution Factor with ISTDs
```

Signal 1: DAD1 C, Sig=270,4 Ref=360,100

| Peak # | RetTime [min] | Type | Width [min] | Area [mAU*s] | Height [mAU] | Area %  |
|--------|---------------|------|-------------|--------------|--------------|---------|
| 1      | 5.831         | BB   | 0.2078      | 1205.45764   | 84.82709     | 49.9844 |
| 2      | 7.155         | BB   | 0.2815      | 1206.21167   | 63.52610     | 50.0156 |

Totals : 2411.66931 148.35319

\*\*\* End of Report \*\*\*



Data File C:\CHEM32\2\DATA\EDN\DEF\_LC 2017-03-31 15-19-03\EDN-1-457.D  
Sample Name: EDN-1-457

```
=====
Acq. Operator   : SYSTEM                      Seq. Line :    3
Acq. Instrument : Biggie                     Location  : Vial 22
Injection Date  : 3/31/2017 4:02:18 PM      Inj       :    1
                                           Inj Volume: 5.000 µl

Acq. Method     : C:\CHEM32\2\DATA\EDN\DEF_LC 2017-03-31 15-19-03\5IPA15-OD.M
Last changed    : 3/31/2017 3:19:03 PM by SYSTEM
Analysis Method : C:\CHEM32\2\DATA\EDN\DEF_LC 2017-03-31 15-19-03\5IPA15-OD.M (Sequence
Method)
Last changed    : 7/12/2017 10:55:19 AM by SYSTEM
                 (modified after loading)
Method Info     : 5% IPA in hexanes, 15 min, OD-H, 1.0 mL/min
=====
```

Additional Info : Peak(s) manually integrated

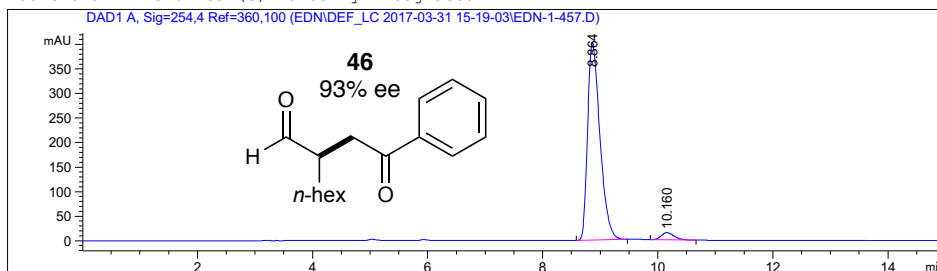

=====  
Area Percent Report  
=====

```
Sorted By      :      Signal
Multiplier     :      1.0000
Dilution       :      1.0000
Do not use Multiplier & Dilution Factor with ISTDs
```

Signal 1: DAD1 A, Sig=254,4 Ref=360,100

| Peak # | RetTime [min] | Type | Width [min] | Area [mAU*s] | Height [mAU] | Area %  |
|--------|---------------|------|-------------|--------------|--------------|---------|
| 1      | 8.864         | BB   | 0.2302      | 6006.71191   | 402.20395    | 96.3978 |
| 2      | 10.160        | BB   | 0.2356      | 224.46104    | 14.58199     | 3.6022  |

Totals :                           6231.17296 416.78594

=====  
\*\*\* End of Report \*\*\*

Data File C:\CHEM32\2\DATA\EDN\DEF\_LC 2017-03-30 11-49-31\EDN-1-455.D  
Sample Name: EDN-1-455

```
=====
Acq. Operator   : SYSTEM                      Seq. Line : 15
Acq. Instrument : Biggie                     Location  : Vial 21
Injection Date  : 3/30/2017 4:02:58 PM      Inj       : 1
                                           Inj Volume: 5.000 µl

Acq. Method    : C:\CHEM32\2\DATA\EDN\DEF_LC 2017-03-30 11-49-31\5IPA15-OD.M
Last changed   : 3/30/2017 2:17:44 PM by SYSTEM
Analysis Method : C:\CHEM32\2\DATA\EDN\DEF_LC 2017-03-30 11-49-31\5IPA15-OD.M (Sequence
Method)
Last changed   : 7/12/2017 10:44:01 AM by SYSTEM
                (modified after loading)
Method Info    : 5% IPA in hexanes, 15 min, OD-H, 1.0 mL/min
=====
```

Additional Info : Peak(s) manually integrated

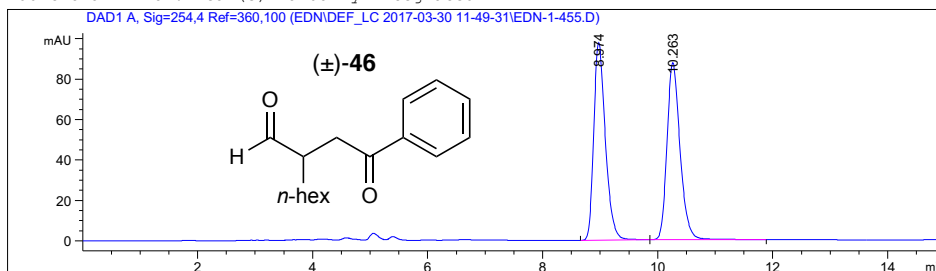

Area Percent Report

```
Sorted By      : Signal
Multiplier     : 1.0000
Dilution       : 1.0000
Do not use Multiplier & Dilution Factor with ISTDs
```

Signal 1: DAD1 A, Sig=254,4 Ref=360,100

| Peak # | RetTime [min] | Type | Width [min] | Area [mAU*s] | Height [mAU] | Area %  |
|--------|---------------|------|-------------|--------------|--------------|---------|
| 1      | 8.974         | BB   | 0.2136      | 1368.74939   | 97.58306     | 49.8327 |
| 2      | 10.263        | BB   | 0.2418      | 1377.93872   | 87.46998     | 50.1673 |

Totals : 2746.68811 185.05304

\*\*\* End of Report \*\*\*

Data File C:\CHEM32\2\DATA\EDN\DEF\_LC 2017-04-04 17-40-41\EDN-1-462-B.D  
Sample Name: EDN-1-462-b

```
=====
Acq. Operator   : SYSTEM                               Seq. Line :    3
Acq. Instrument : Biggie                               Location  : Vial 24
Injection Date  : 4/4/2017 6:24:16 PM                 Inj       :    1
                                                    Inj Volume: 5.000 µl

Acq. Method    : C:\CHEM32\2\DATA\EDN\DEF_LC 2017-04-04 17-40-41\5IPA30-OD.M
Last changed   : 4/4/2017 5:40:42 PM by SYSTEM
Analysis Method : C:\CHEM32\2\DATA\EDN\DEF_LC 2017-04-04 17-40-41\5IPA30-OD.M (Sequence
Method)
Last changed   : 7/12/2017 10:49:27 AM by SYSTEM
                (modified after loading)
Method Info    : 5% IPA in hexanes, 30 min, OD-H, 1.0 mL/min
=====
```

Additional Info : Peak(s) manually integrated

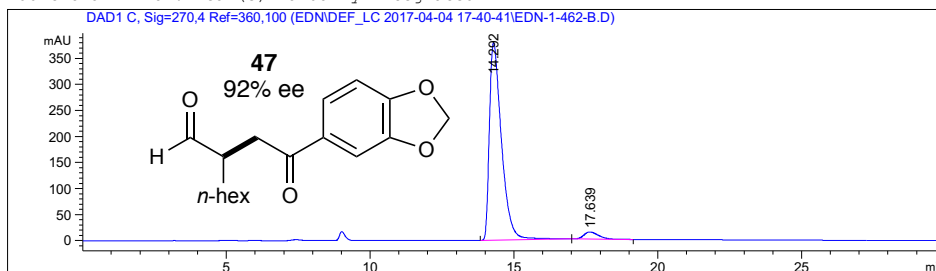

Area Percent Report

```
Sorted By      :      Signal
Multiplier     :      1.0000
Dilution       :      1.0000
Do not use Multiplier & Dilution Factor with ISTDs
```

Signal 1: DAD1 C, Sig=270,4 Ref=360,100

| Peak # | RetTime [min] | Type | Width [min] | Area [mAU*s] | Height [mAU] | Area %  |
|--------|---------------|------|-------------|--------------|--------------|---------|
| 1      | 14.292        | BB   | 0.4418      | 1.11128e4    | 379.36121    | 95.8847 |
| 2      | 17.639        | BB   | 0.5346      | 476.95032    | 13.68663     | 4.1153  |

Totals : 1.15898e4 393.04783

\*\*\* End of Report \*\*\*

Data File C:\CHEM32\2\DATA\EDN\DEF\_LC 2017-03-31 15-19-03\EDN-1-458.D  
Sample Name: EDN-1-458

```
=====
Acq. Operator   : SYSTEM                      Seq. Line :    6
Acq. Instrument : Biggie                     Location  : Vial 23
Injection Date  : 3/31/2017 5:06:57 PM      Inj       :    1
                                           Inj Volume: 5.000 µl

Acq. Method     : C:\CHEM32\2\DATA\EDN\DEF_LC 2017-03-31 15-19-03\5IPA30-OD.M
Last changed    : 3/31/2017 3:19:03 PM by SYSTEM
Analysis Method : C:\CHEM32\2\DATA\EDN\DEF_LC 2017-03-31 15-19-03\5IPA30-OD.M (Sequence
Method)
Last changed    : 7/12/2017 10:47:09 AM by SYSTEM
                (modified after loading)
Method Info     : 5% IPA in hexanes, 30 min, OD-H, 1.0 mL/min
=====
```

Additional Info : Peak(s) manually integrated

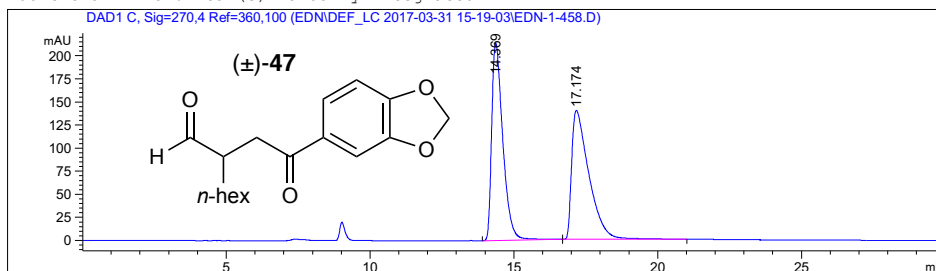

=====  
Area Percent Report  
=====

```
Sorted By      :      Signal
Multiplier     :      1.0000
Dilution       :      1.0000
Do not use Multiplier & Dilution Factor with ISTDs
```

Signal 1: DAD1 C, Sig=270,4 Ref=360,100

| Peak # | RetTime [min] | Type | Width [min] | Area [mAU*s] | Height [mAU] | Area %  |
|--------|---------------|------|-------------|--------------|--------------|---------|
| 1      | 14.369        | BB   | 0.4074      | 5750.84766   | 214.08357    | 49.7459 |
| 2      | 17.174        | BB   | 0.6111      | 5809.59863   | 139.72382    | 50.2541 |

Totals :                    1.15604e4   353.80739

=====  
\*\*\* End of Report \*\*\*

Data File C:\CHEM32\2\DATA\EDN\DEF\_LC 2017-04-07 10-40-06\EDN-1-467-OC38-B.D  
Sample Name: EDN-1-467-OC38-b

```
=====
Acq. Operator   : SYSTEM                      Seq. Line :    4
Acq. Instrument : Biggie                     Location  : Vial 23
Injection Date  : 4/7/2017 12:05:24 PM      Inj       :    1
                                                Inj Volume: 5.000 µl

Acq. Method     : C:\CHEM32\2\DATA\EDN\DEF_LC 2017-04-07 10-40-06\0.5IPA30-OD.M
Last changed    : 4/7/2017 10:40:07 AM by SYSTEM
Analysis Method : C:\CHEM32\2\DATA\EDN\DEF_LC 2017-04-07 10-40-06\0.5IPA30-OD.M (Sequence
Method)
Last changed    : 7/12/2017 10:53:48 AM by SYSTEM
                (modified after loading)
Method Info     : 0.5% IPA in hexanes, 30 min, OD-H, 1.0 mL/min
=====
```

Additional Info : Peak(s) manually integrated

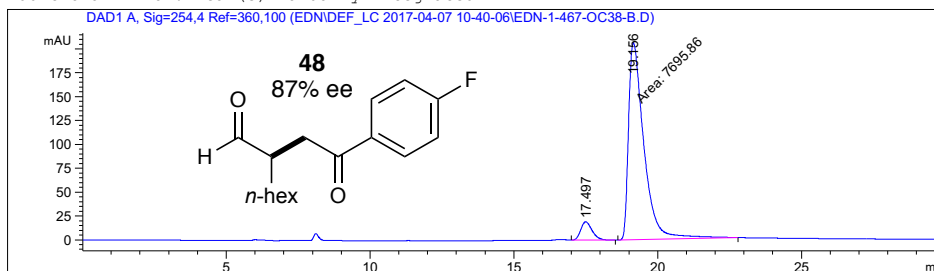

=====  
Area Percent Report  
=====

```
Sorted By      :      Signal
Multiplier     :      1.0000
Dilution       :      1.0000
Do not use Multiplier & Dilution Factor with ISTDs
```

Signal 1: DAD1 A, Sig=254,4 Ref=360,100

| Peak # | RetTime [min] | Type | Width [min] | Area [mAU*s] | Height [mAU] | Area %  |
|--------|---------------|------|-------------|--------------|--------------|---------|
| 1      | 17.497        | BB   | 0.4236      | 526.23383    | 19.21211     | 6.4002  |
| 2      | 19.156        | MM   | 0.6214      | 7695.86182   | 206.39928    | 93.5998 |

Totals : 8222.09564 225.61139

=====  
\*\*\* End of Report \*\*\*



Data File C:\CHEM32\2\DATA\EDN\DEF\_LC 2017-06-30 15-11-49\EDN-1-583B.D  
Sample Name: EDN-1-583b

```
=====
Acq. Operator   : SYSTEM                      Seq. Line :    3
Acq. Instrument : Biggie                      Location  : Vial 41
Injection Date  : 6/30/2017 3:55:07 PM       Inj       :    1
                                           Inj Volume: 5.000 µl

Acq. Method     : C:\CHEM32\2\DATA\EDN\DEF_LC 2017-06-30 15-11-49\5IPA30-AS.M
Last changed    : 6/30/2017 3:11:49 PM by SYSTEM
Analysis Method : C:\CHEM32\2\DATA\EDN\DEF_LC 2017-06-30 15-11-49\5IPA30-AS.M (Sequence
Method)
Last changed    : 7/12/2017 8:52:31 AM by SYSTEM
                 (modified after loading)
Method Info     : 5% IPA in hexanes, 30 min, AS-H, 1.0 mL/min
=====
```

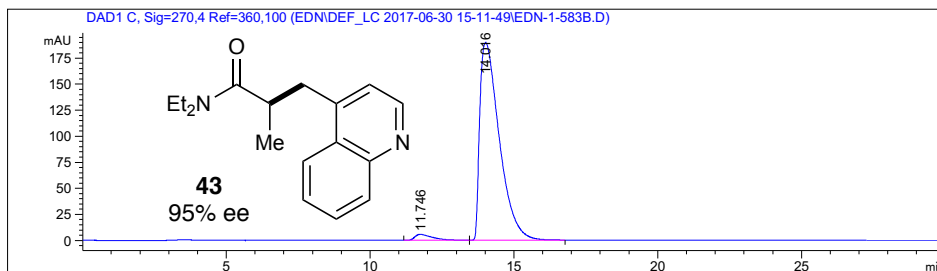

=====  
Area Percent Report  
=====

Sorted By : Signal  
Multiplier : 1.0000  
Dilution : 1.0000  
Do not use Multiplier & Dilution Factor with ISTDs

Signal 1: DAD1 C, Sig=270,4 Ref=360,100

| Peak # | RetTime [min] | Type | Width [min] | Area [mAU*s] | Height [mAU] | Area %  |
|--------|---------------|------|-------------|--------------|--------------|---------|
| 1      | 11.746        | BB   | 0.5897      | 231.77420    | 5.61322      | 2.5279  |
| 2      | 14.016        | BB   | 0.7237      | 8936.82520   | 189.68474    | 97.4721 |

Totals : 9168.59940 195.29796

=====  
\*\*\* End of Report \*\*\*

Data File C:\CHEM32\2\DATA\EDN\DEF\_LC 2017-06-27 15-34-11\EDN-1-578-5IPA30AS.D  
Sample Name: EDN-1-578-5IPA30AS

```
=====
Acq. Operator   : SYSTEM                      Seq. Line :    7
Acq. Instrument : Biggie                     Location  : Vial 41
Injection Date  : 6/27/2017 4:53:31 PM      Inj       :    1
                                           Inj Volume: 5.000 µl

Acq. Method     : C:\CHEM32\2\DATA\EDN\DEF_LC 2017-06-27 15-34-11\5IPA30-AS.M
Last changed    : 6/27/2017 4:40:55 PM by SYSTEM
Analysis Method : C:\CHEM32\2\DATA\EDN\DEF_LC 2017-06-27 15-34-11\5IPA30-AS.M (Sequence
Method)
Last changed    : 7/12/2017 8:51:44 AM by SYSTEM
                : (modified after loading)
Method Info     : 5% IPA in hexanes, 30 min, AS-H, 1.0 mL/min
=====
```

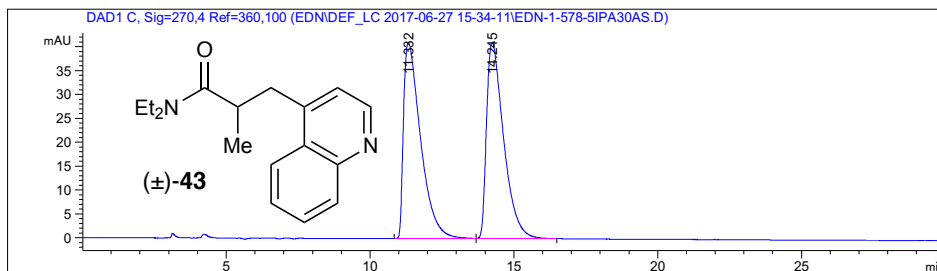

=====  
Area Percent Report  
=====

```
Sorted By      :      Signal
Multiplier     :      1.0000
Dilution       :      1.0000
Do not use Multiplier & Dilution Factor with ISTDs
```

Signal 1: DAD1 C, Sig=270,4 Ref=360,100

| Peak # | RetTime [min] | Type | Width [min] | Area [mAU*s] | Height [mAU] | Area %  |
|--------|---------------|------|-------------|--------------|--------------|---------|
| 1      | 11.332        | BB   | 0.6205      | 1690.04517   | 41.03645     | 49.9927 |
| 2      | 14.245        | BB   | 0.6270      | 1690.53748   | 41.00703     | 50.0073 |

Totals :                    3380.58264    82.04348

=====  
\*\*\* End of Report \*\*\*



Data File C:\CHEM32\2\DATA\EDN\DEF\_LC 2017-07-01 10-26-56\EDN-1-584B.D  
Sample Name: EDN-1-584b

```
=====
Acq. Operator   : SYSTEM                      Seq. Line :    3
Acq. Instrument : Biggie                     Location  : Vial 41
Injection Date  : 7/1/2017 11:05:22 AM      Inj       :    1
                                           Inj Volume: 5.000 µl

Acq. Method     : C:\CHEM32\2\DATA\EDN\DEF_LC 2017-07-01 10-26-56\1IPA25-AD.M
Last changed    : 7/1/2017 10:26:56 AM by SYSTEM
Analysis Method : C:\CHEM32\2\DATA\EDN\DEF_LC 2017-07-01 10-26-56\1IPA25-AD.M (Sequence
Method)
Last changed    : 7/12/2017 8:54:58 AM by SYSTEM
(modified after loading)
Method Info     : 1% IPA in hexanes, 25 min, AD-H, 1.0 mL/min
=====
```

Additional Info : Peak(s) manually integrated

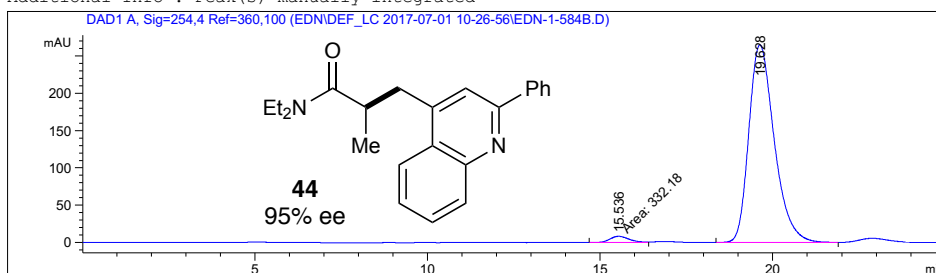

Area Percent Report

```
Sorted By      : Signal
Multiplier     : 1.0000
Dilution       : 1.0000
Do not use Multiplier & Dilution Factor with ISTDs
```

Signal 1: DAD1 A, Sig=254,4 Ref=360,100

| Peak # | RetTime [min] | Type | Width [min] | Area [mAU*s] | Height [mAU] | Area %  |
|--------|---------------|------|-------------|--------------|--------------|---------|
| 1      | 15.536        | MM   | 0.6560      | 332.17975    | 8.43964      | 2.3911  |
| 2      | 19.628        | BB   | 0.7874      | 1.35603e4    | 264.80692    | 97.6089 |

Totals : 1.38925e4 273.24655

\*\*\* End of Report \*\*\*



## XXIV. NMR Spectra

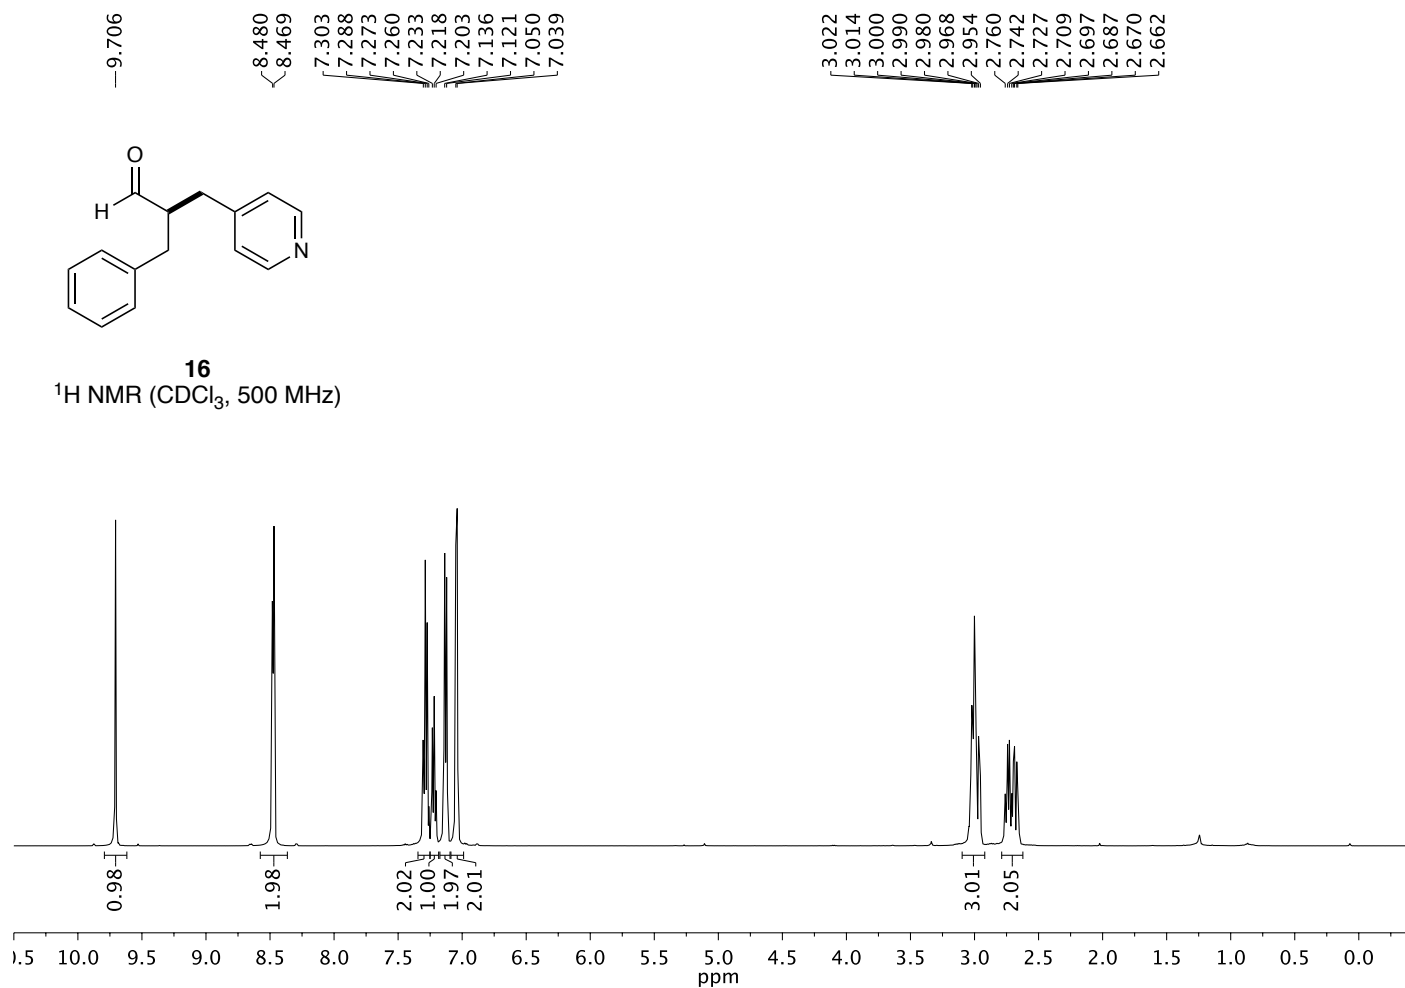

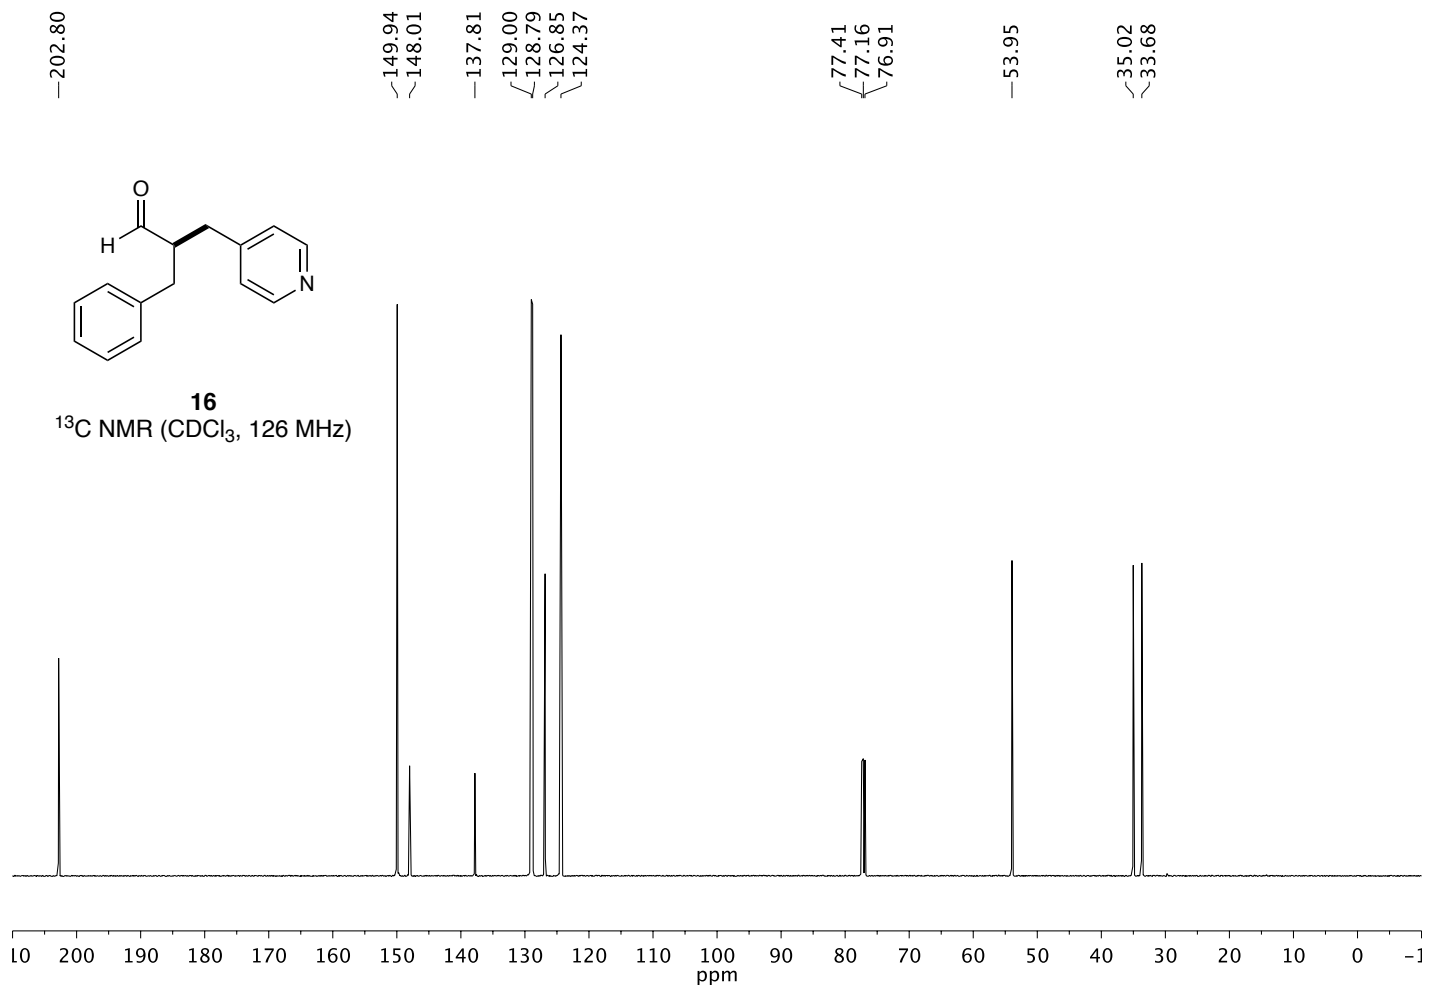

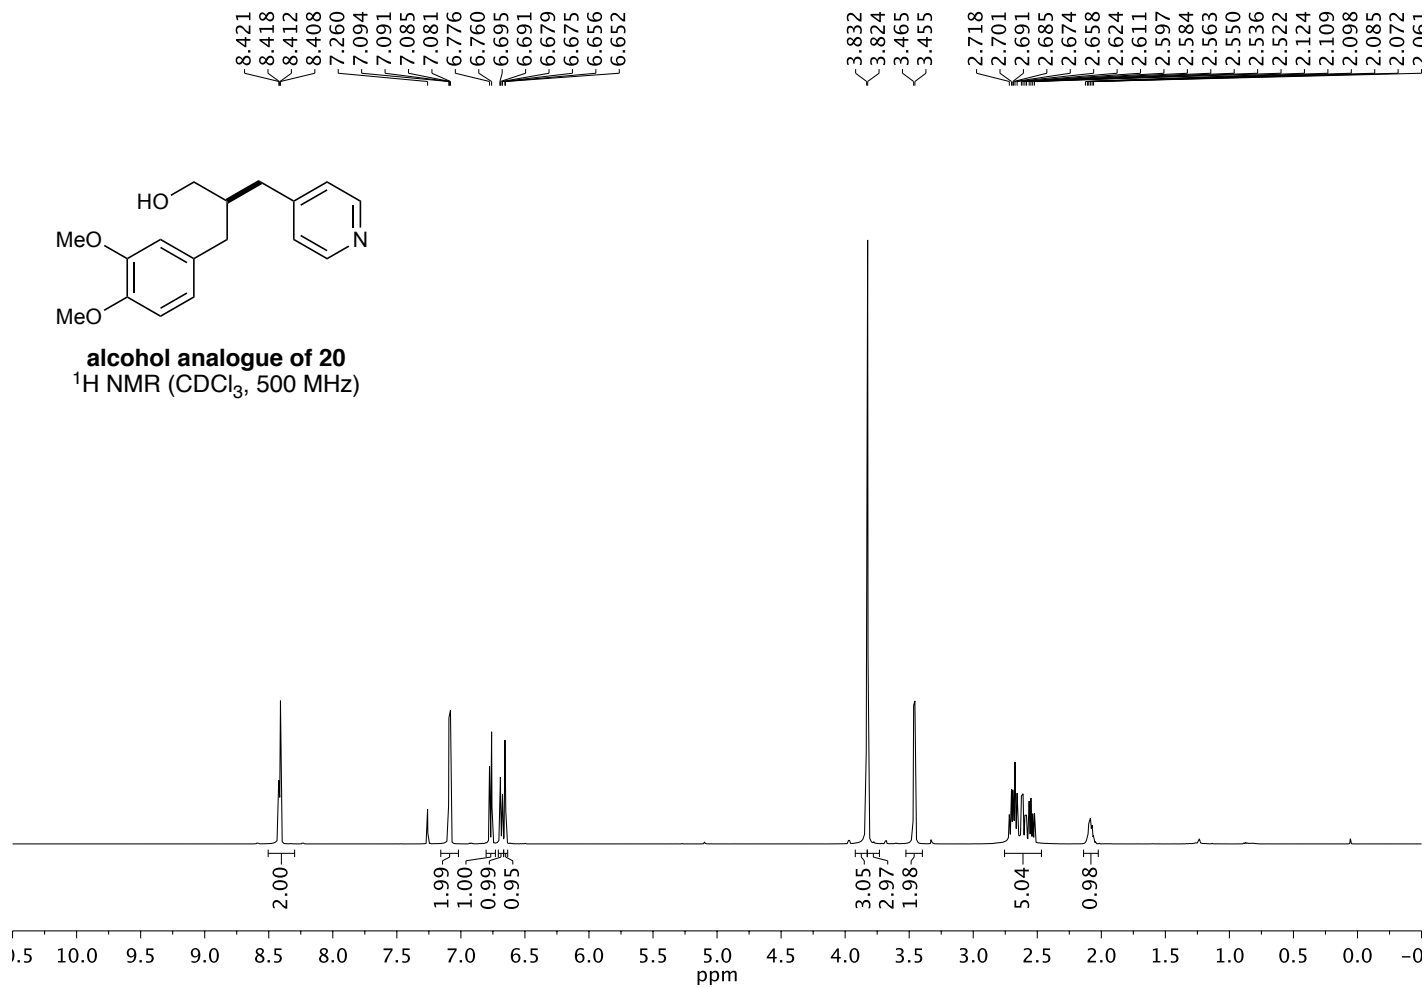

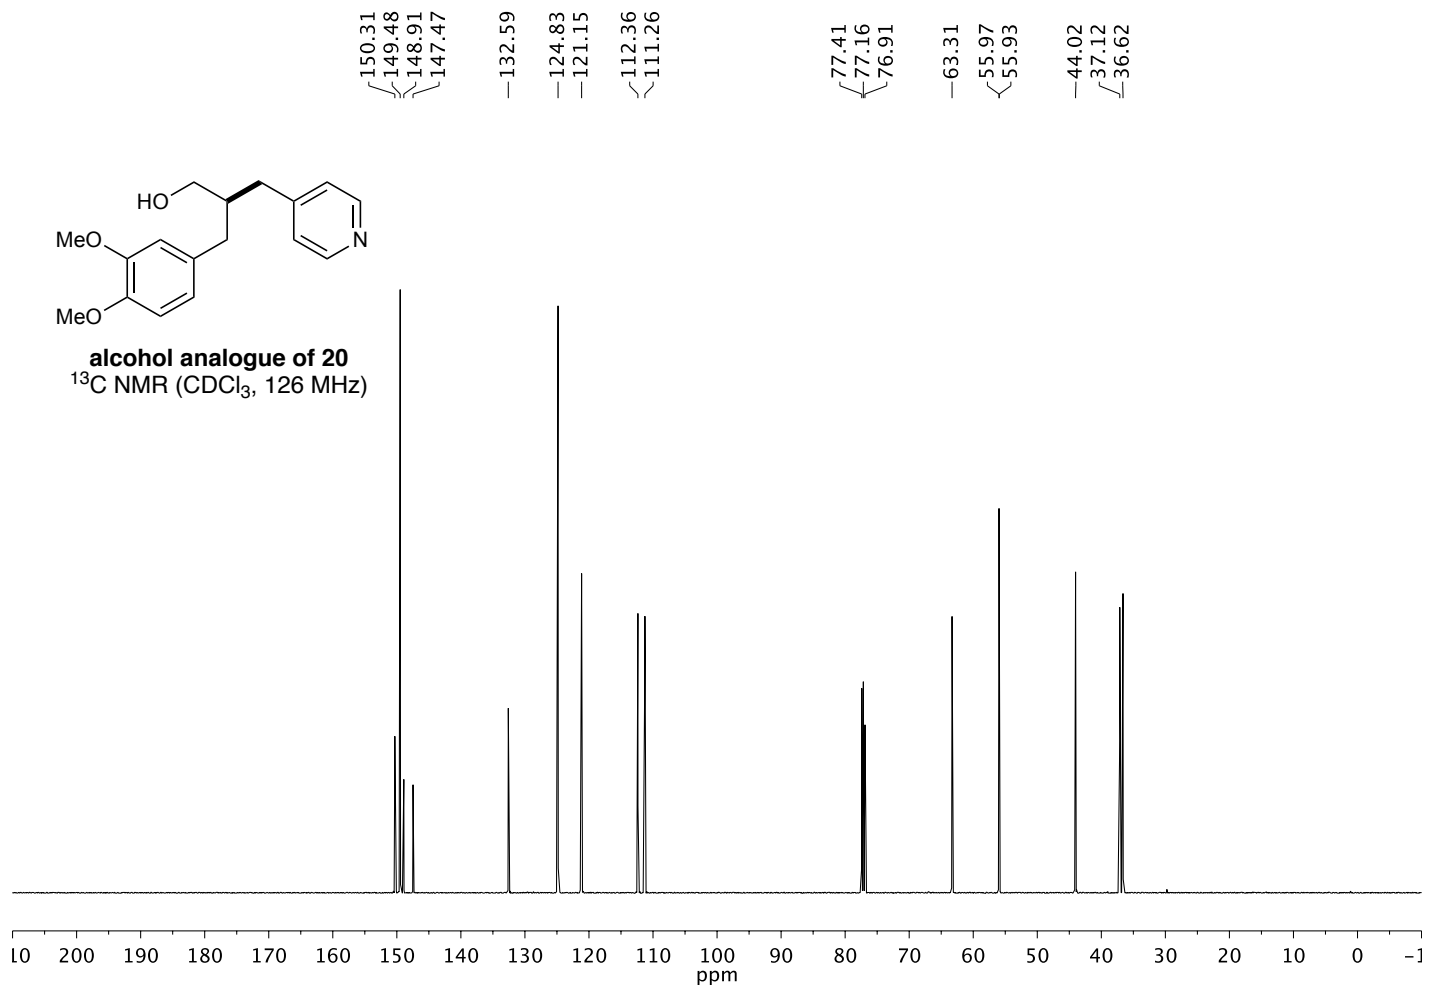

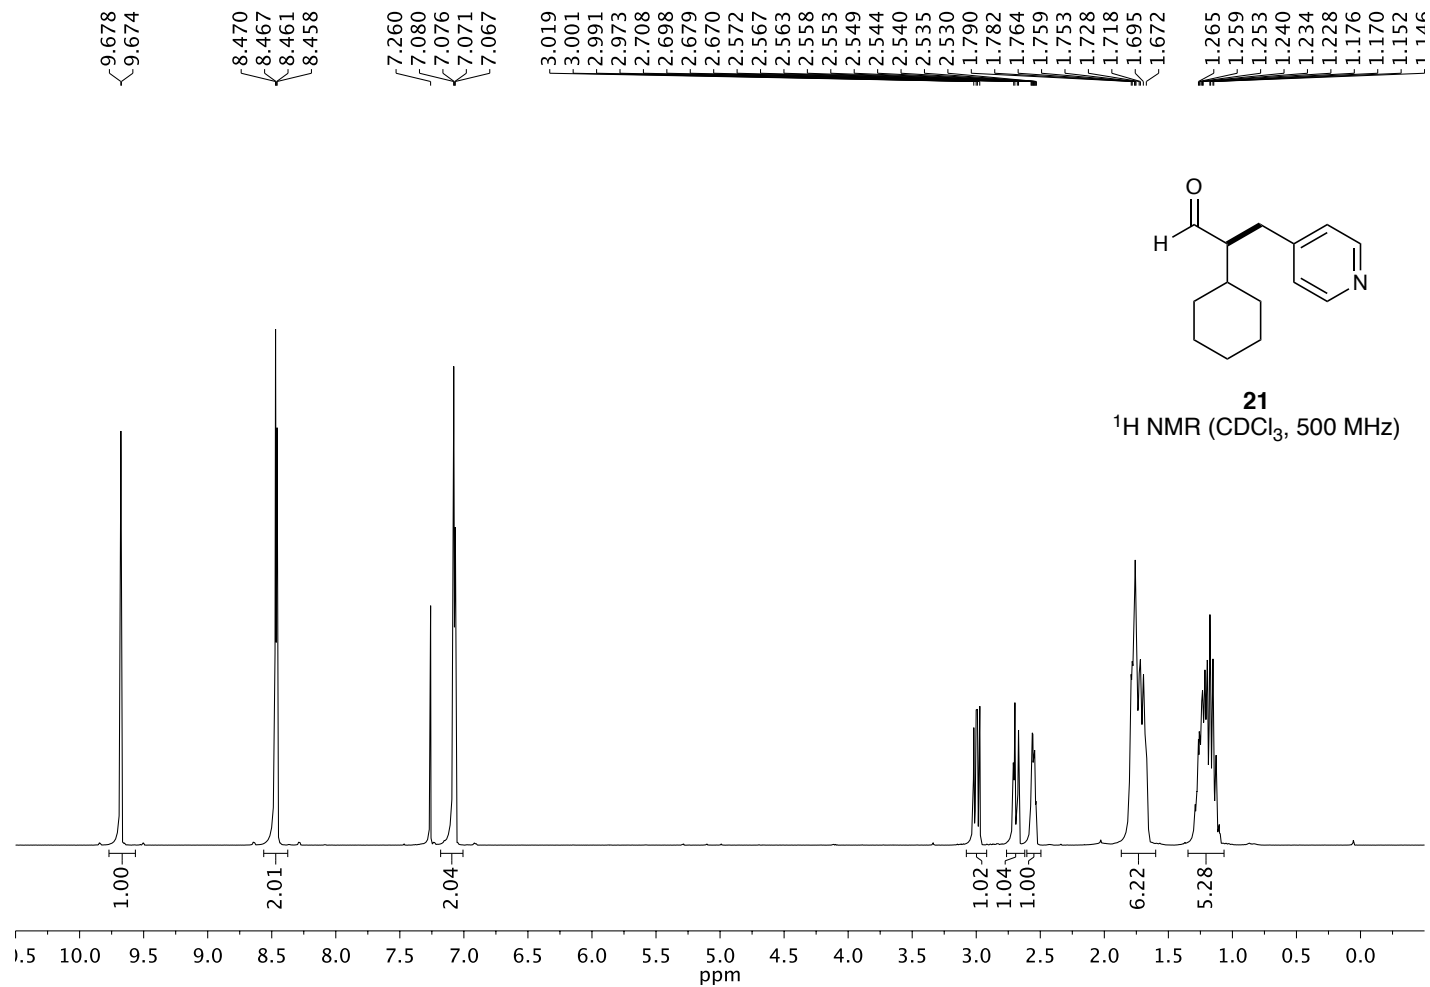

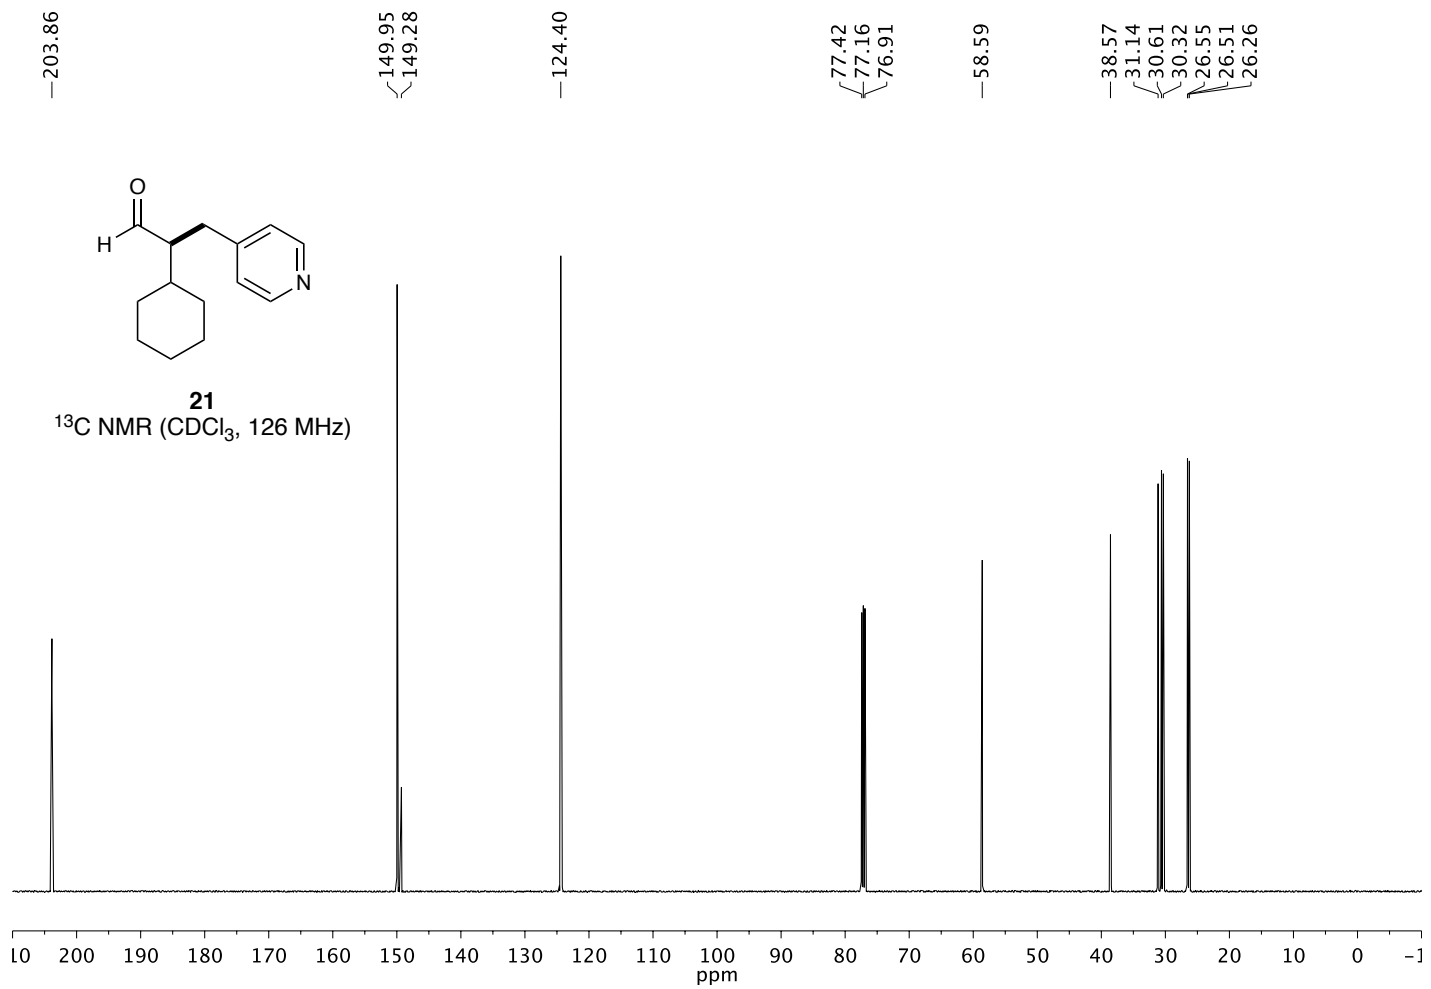



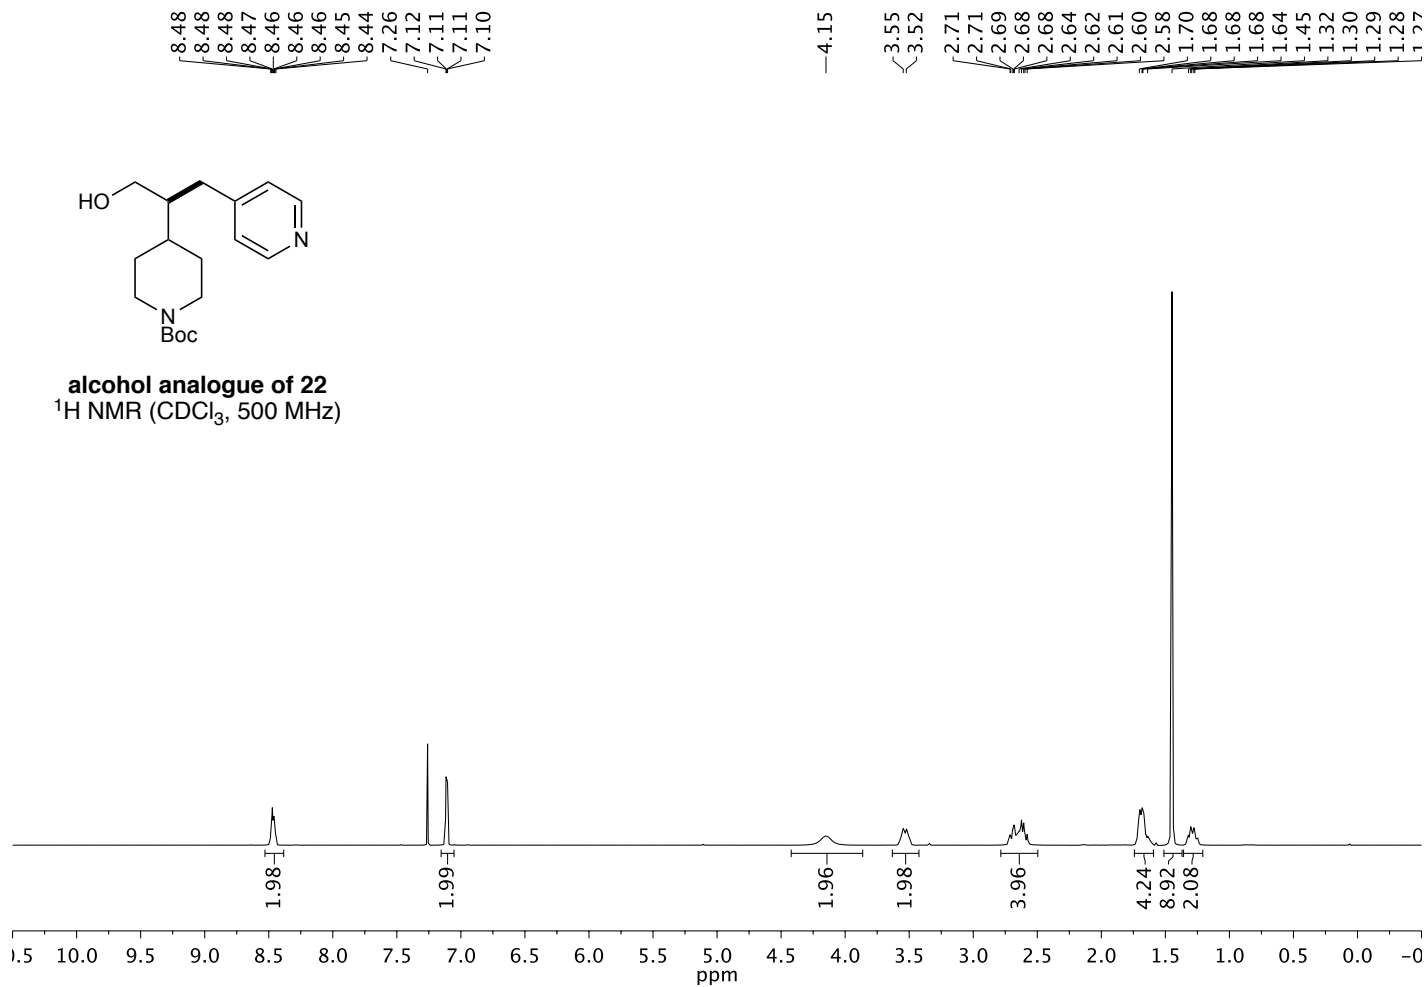

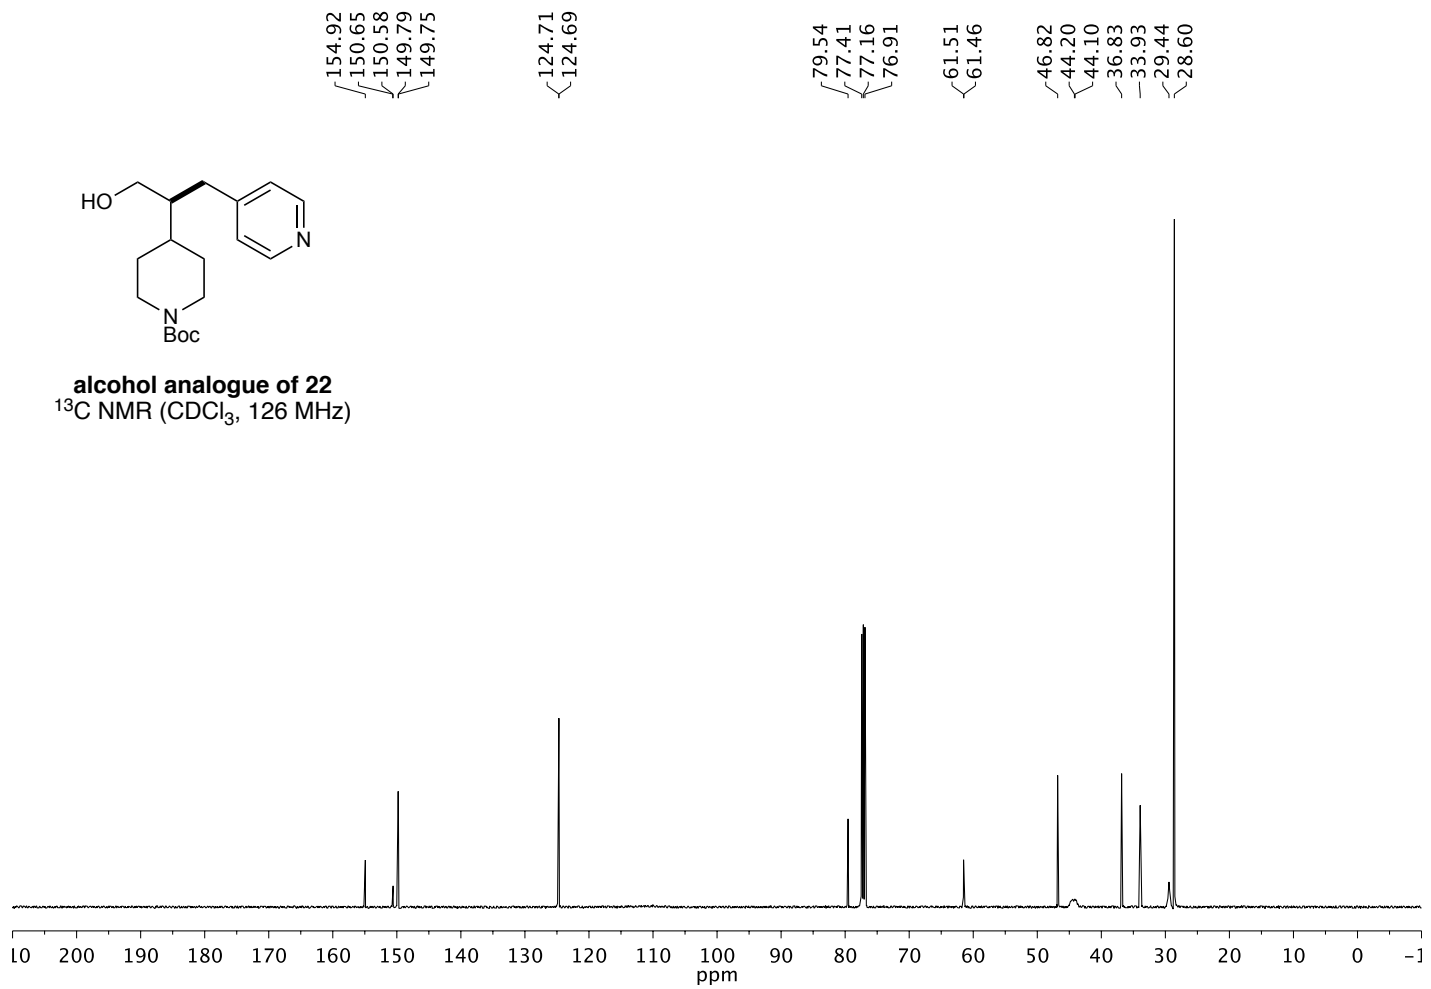

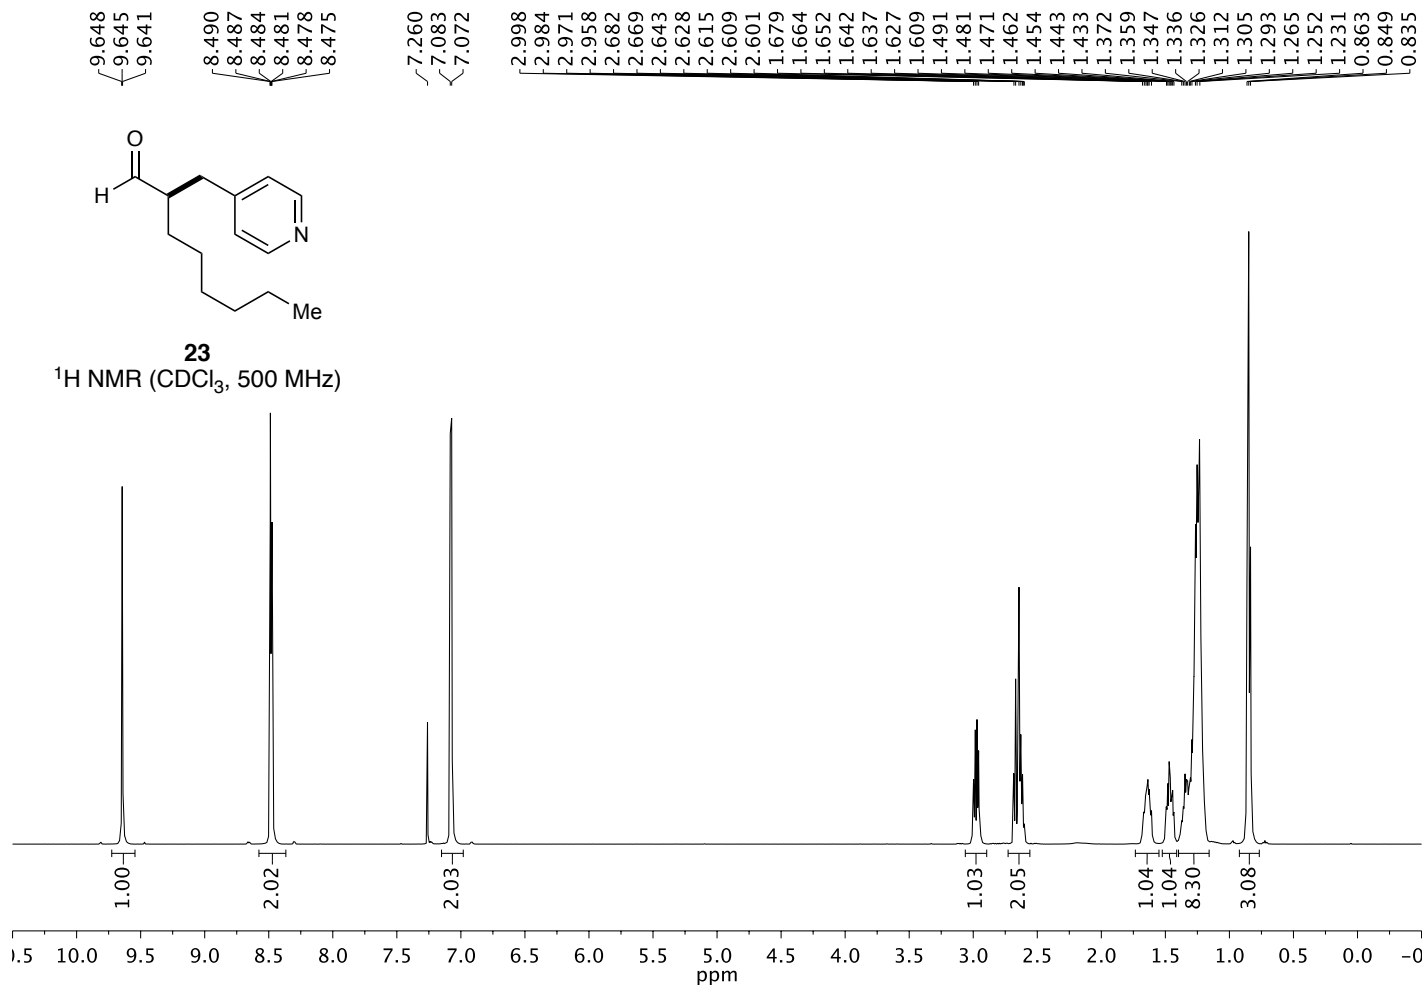

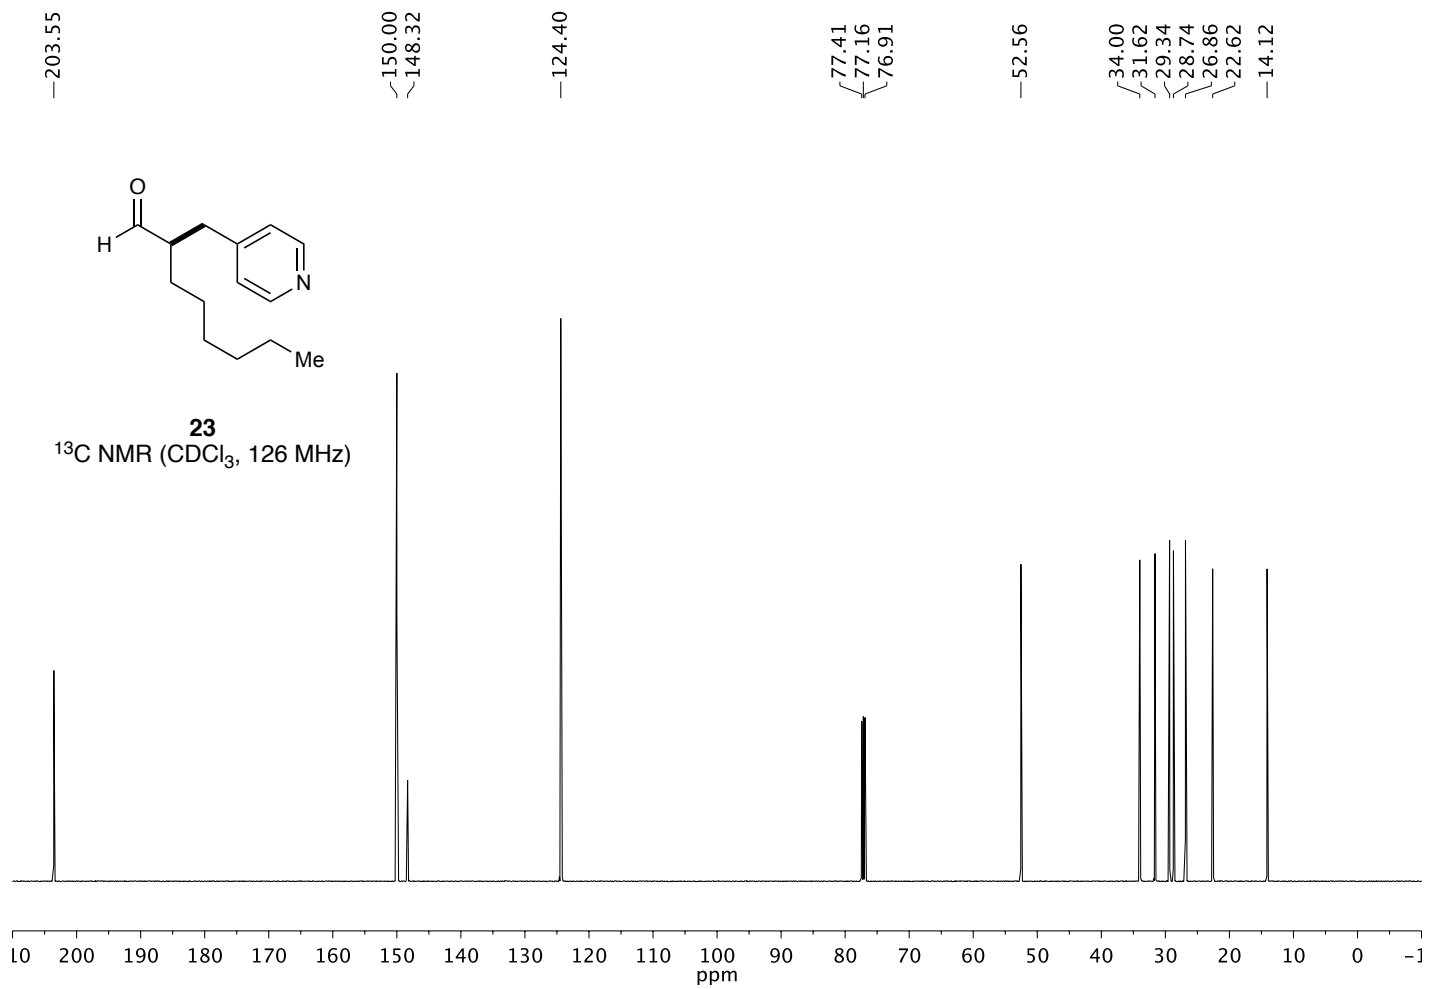

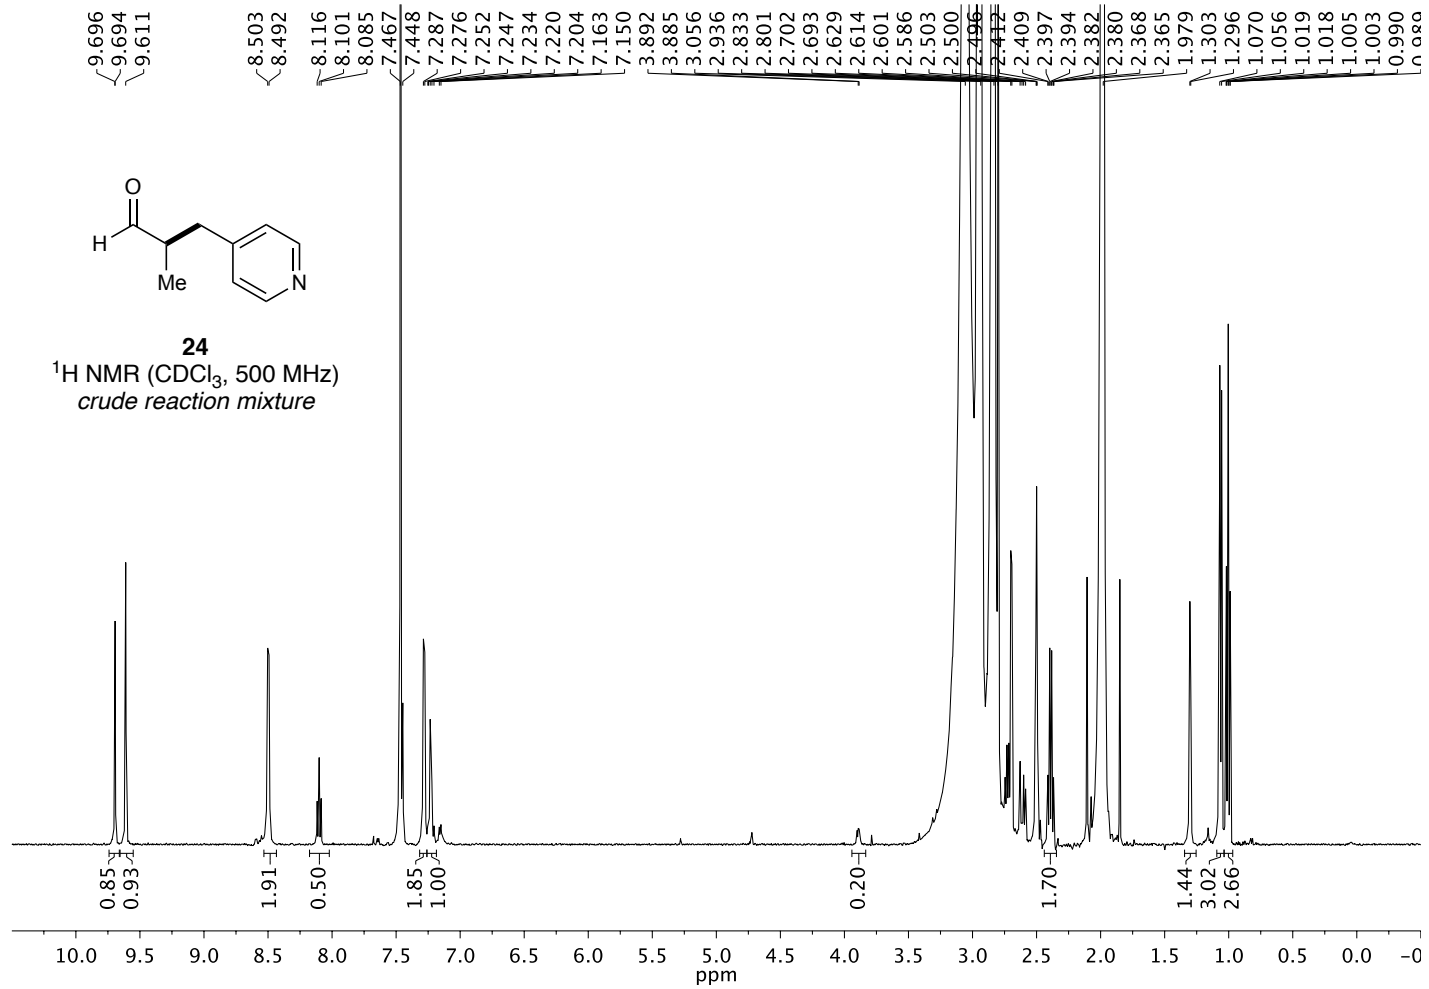

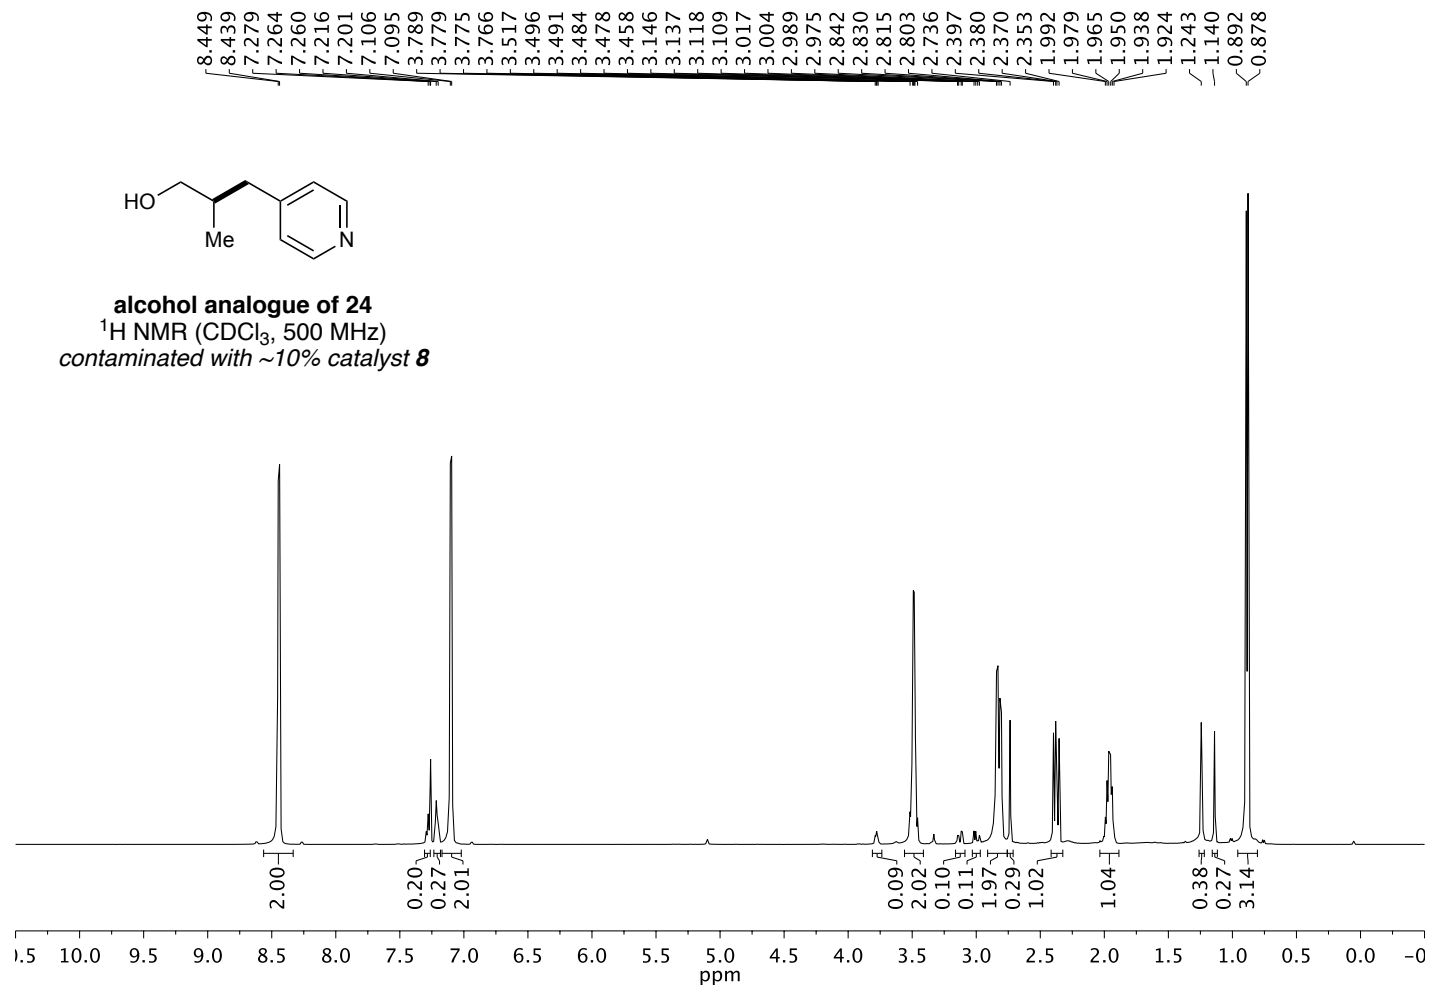

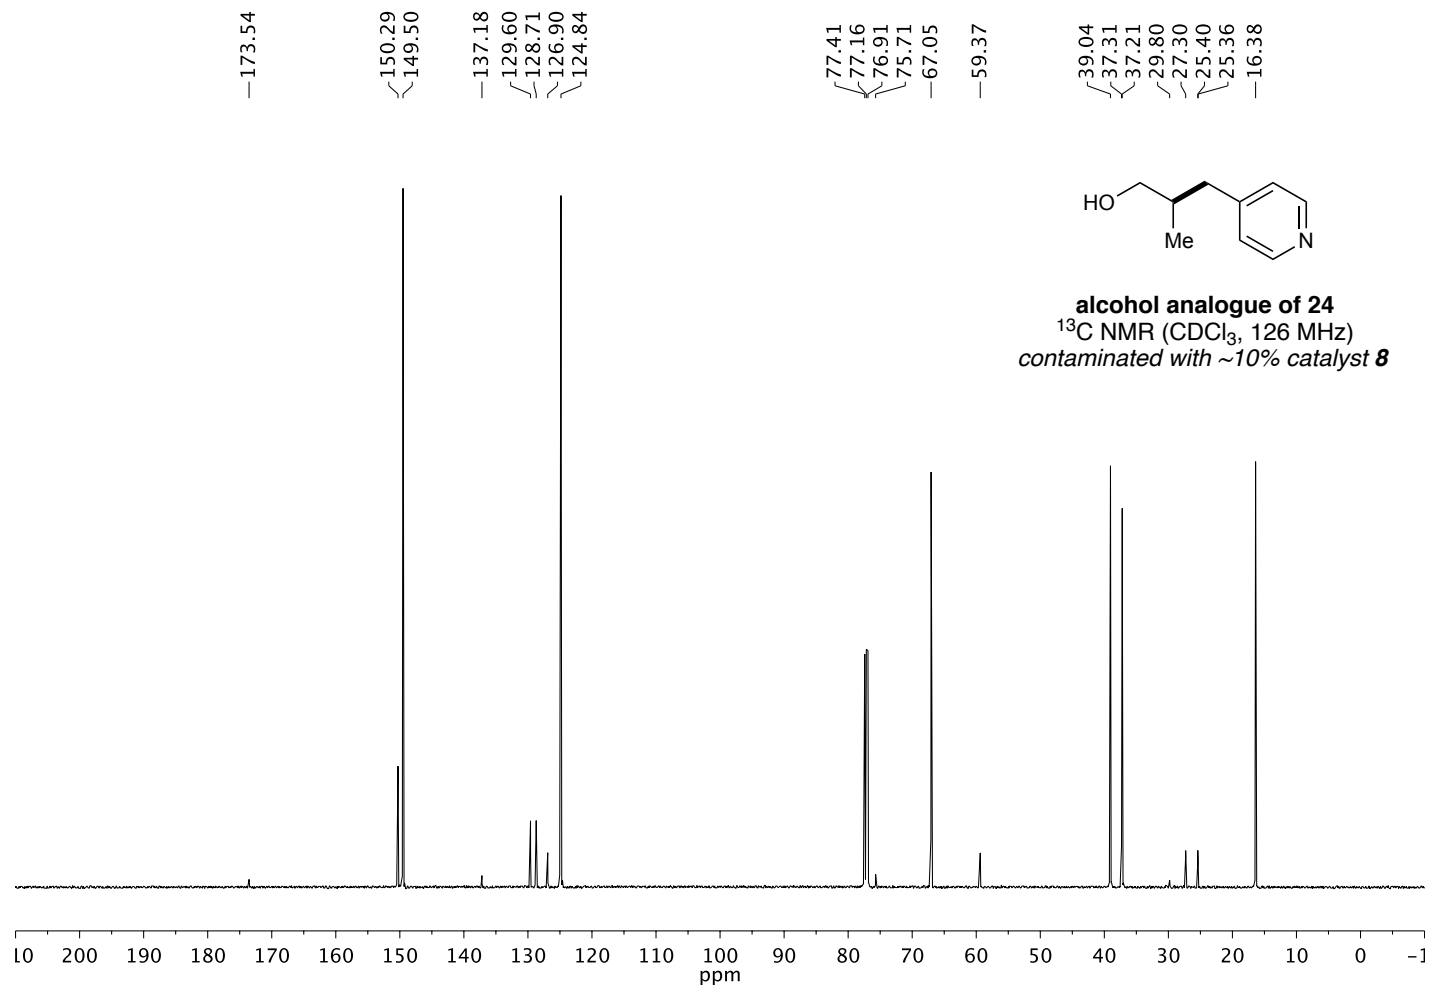

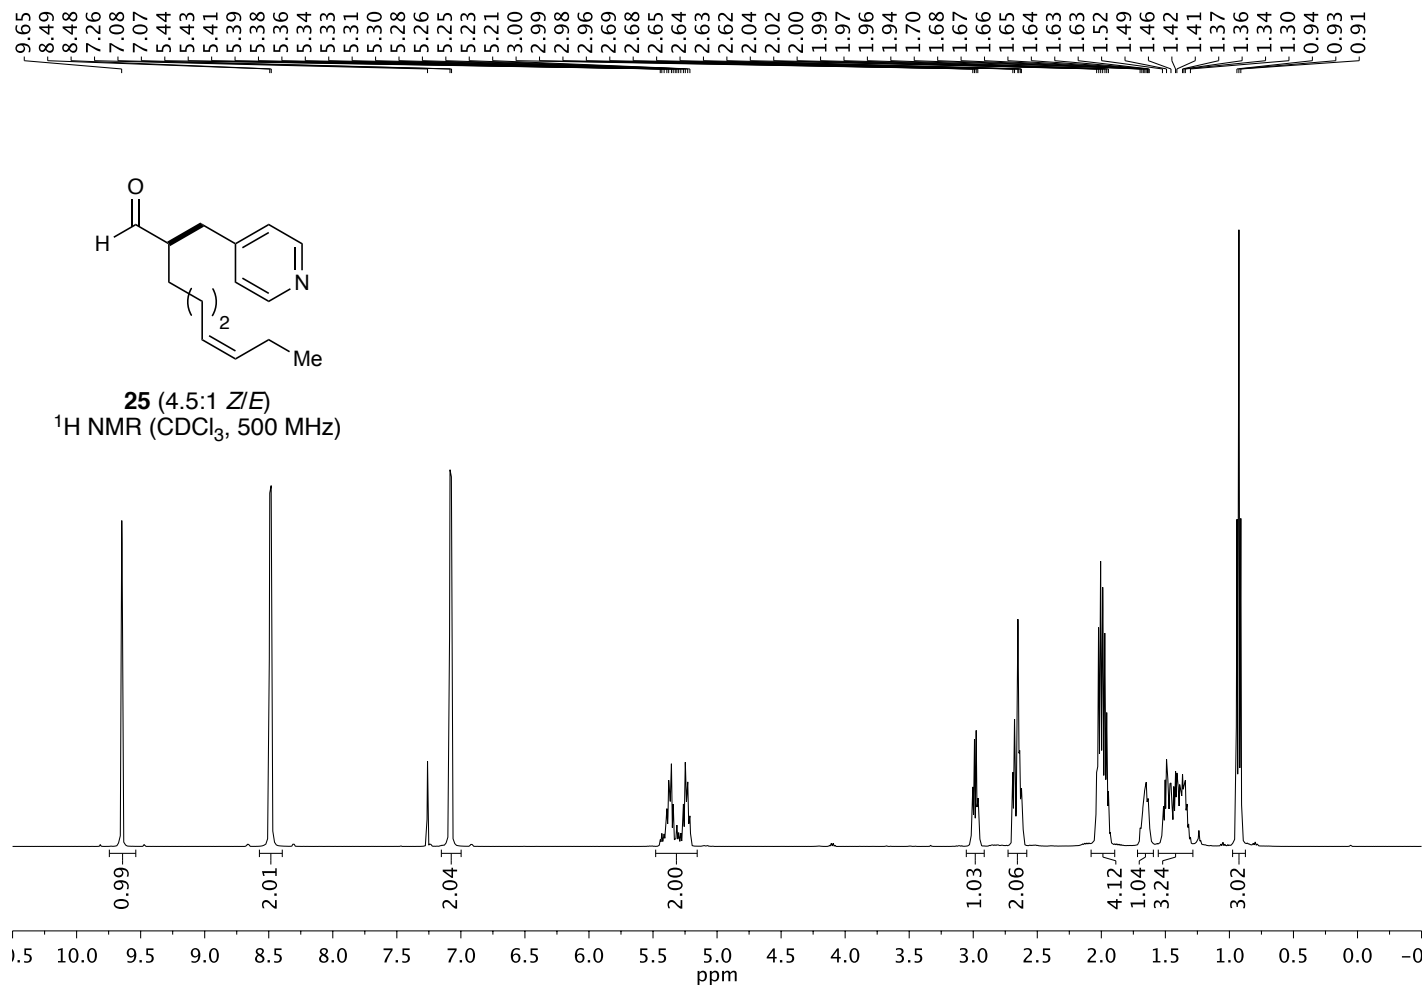



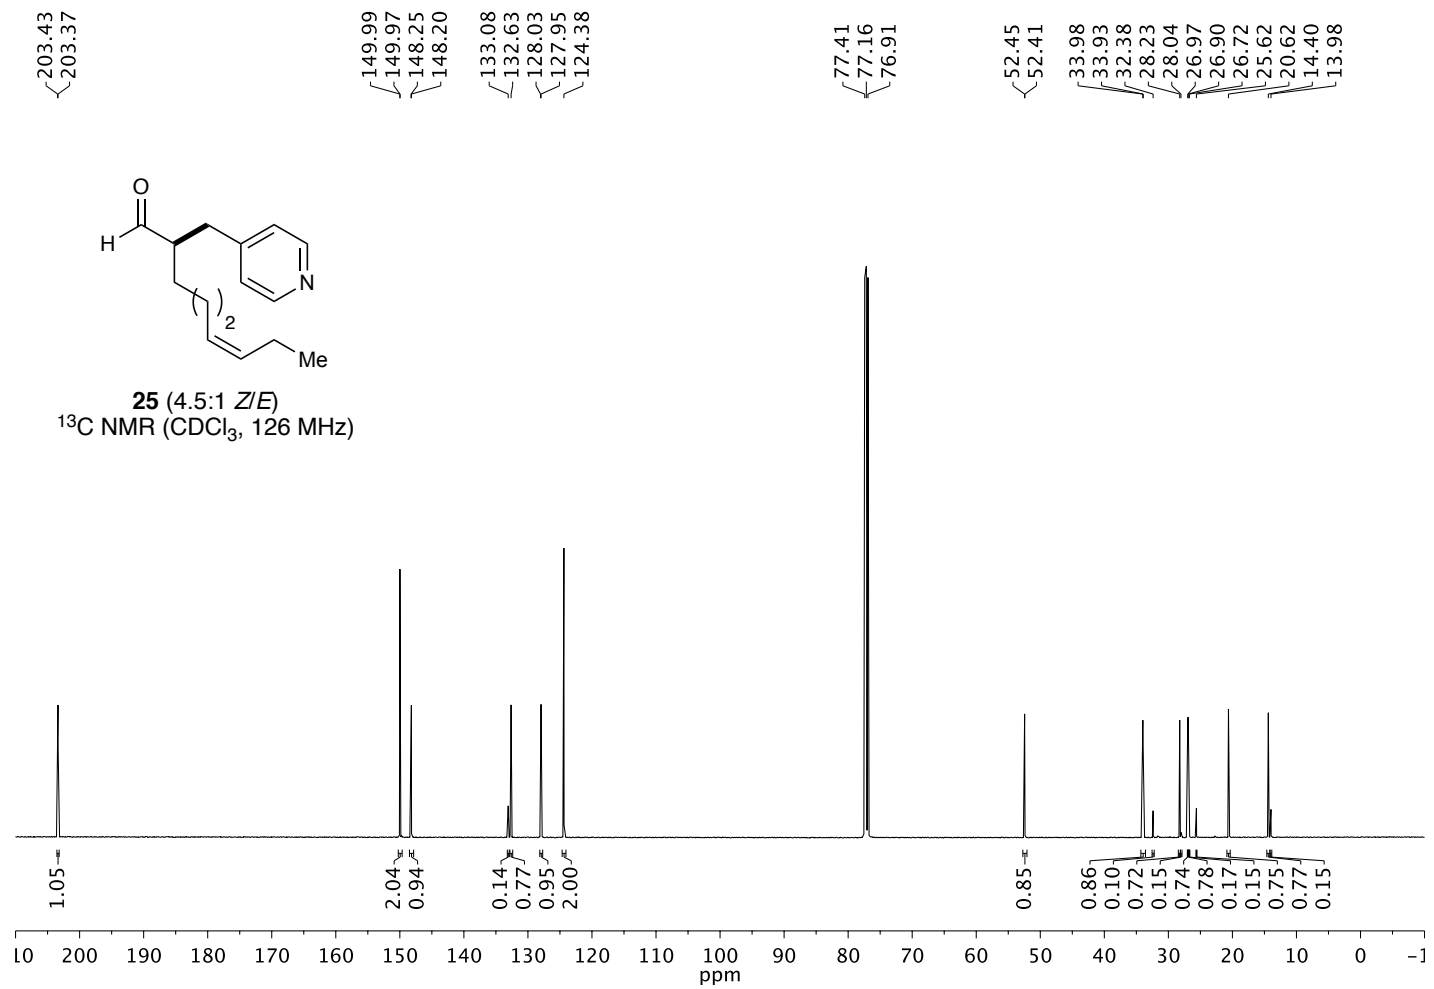

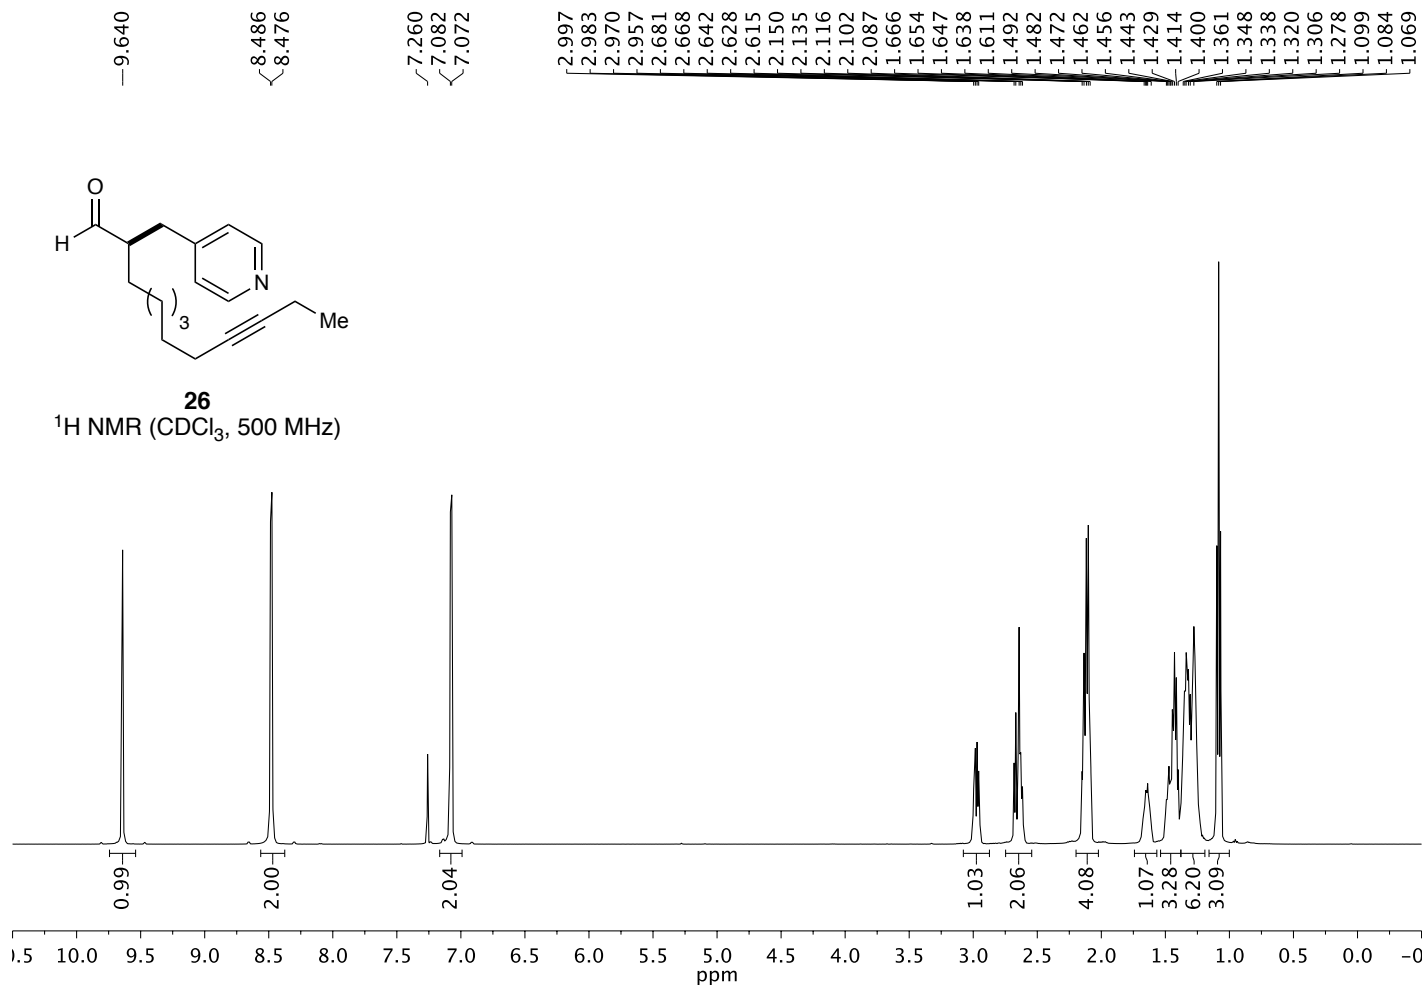

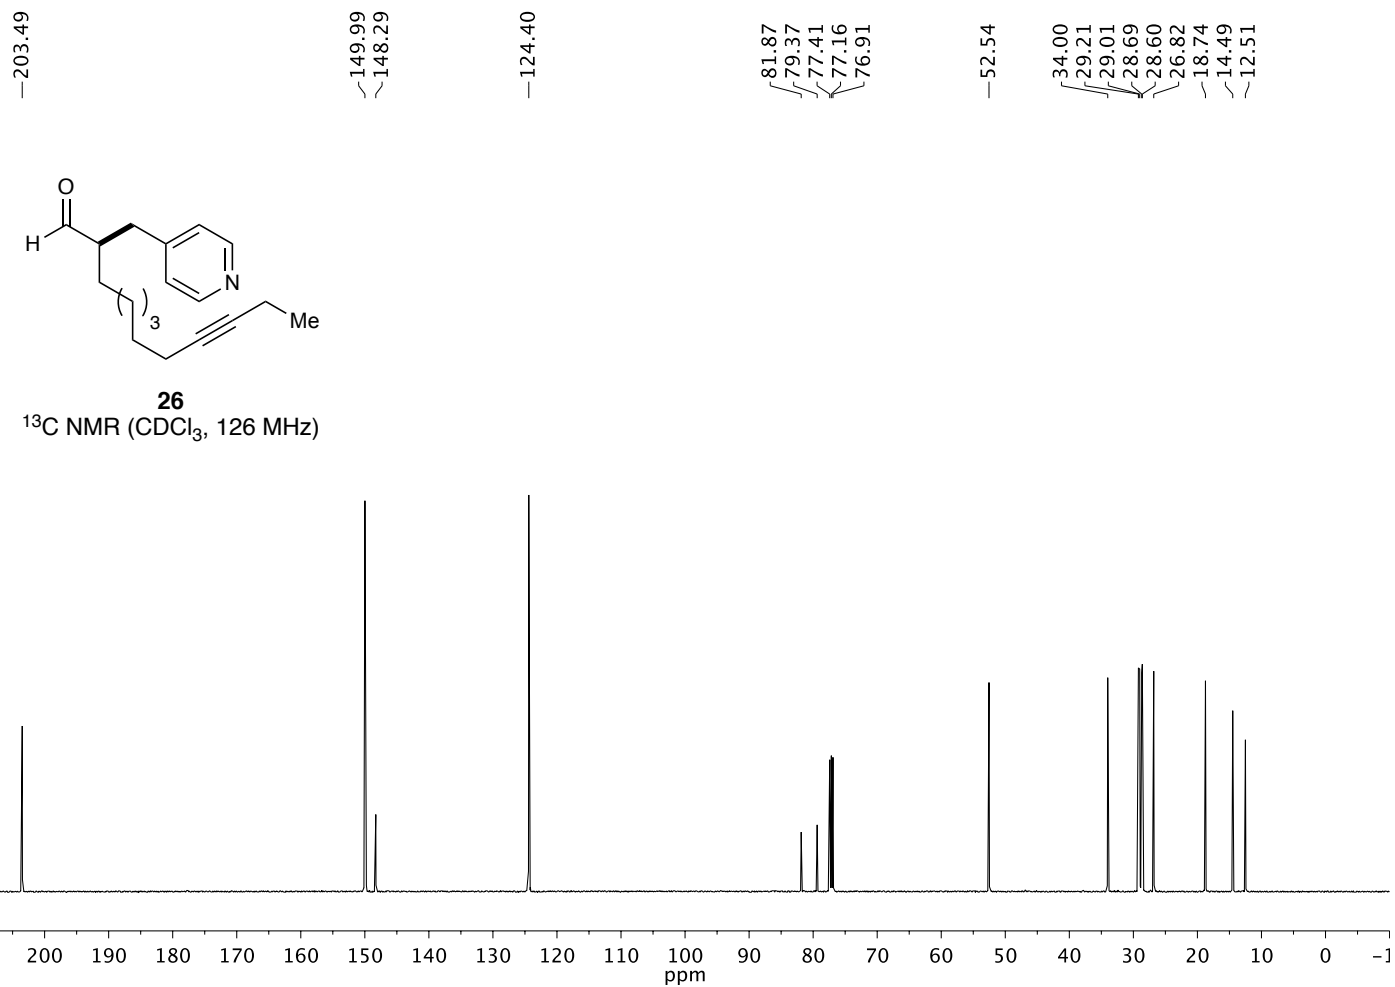

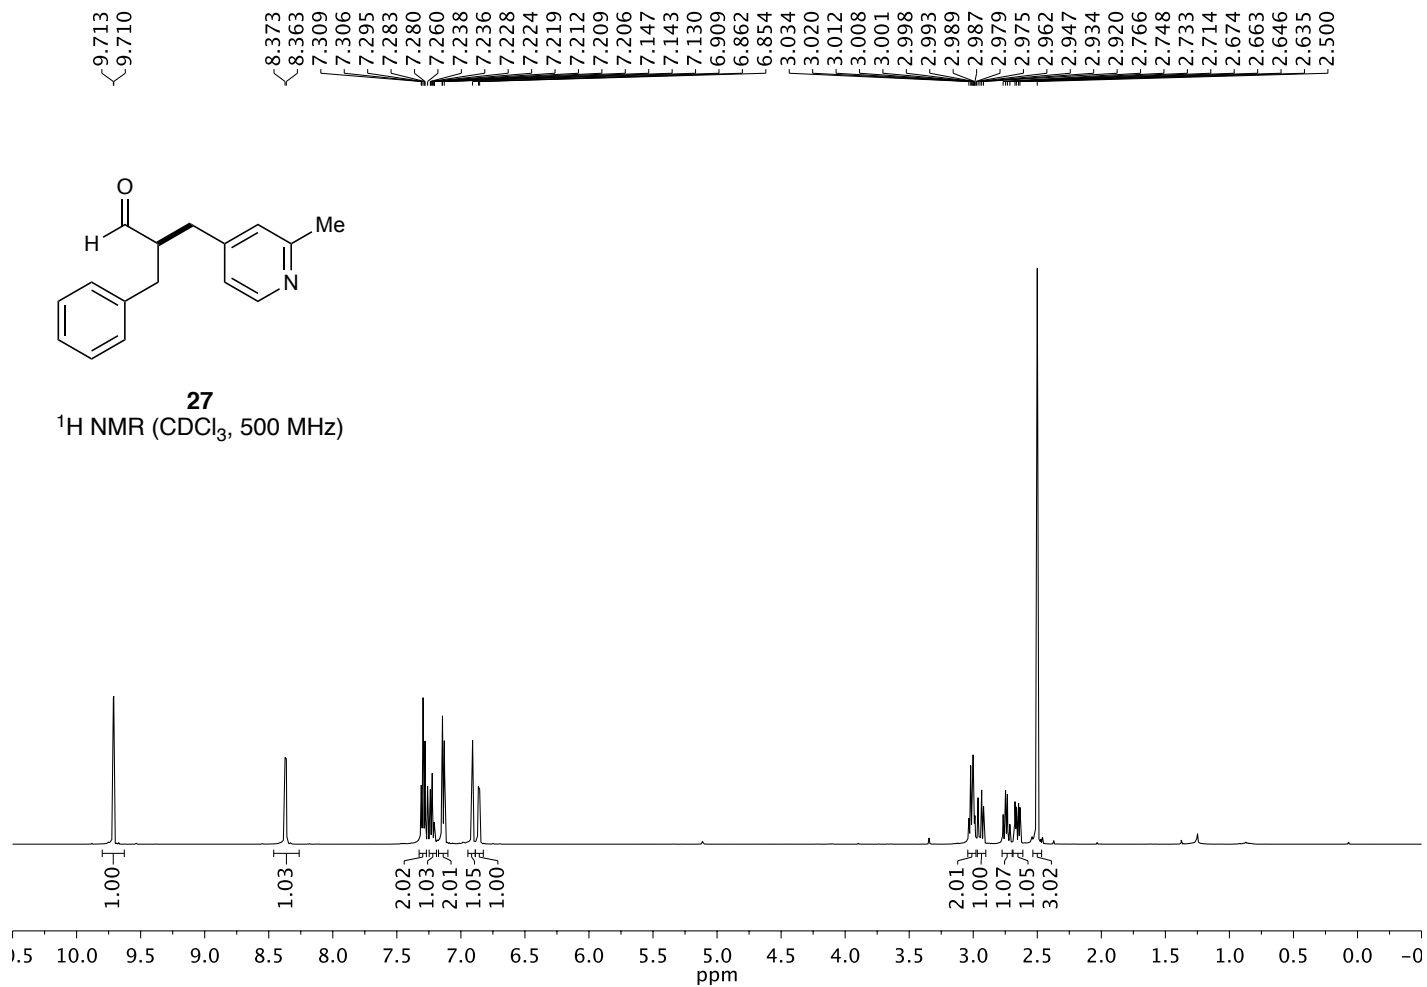

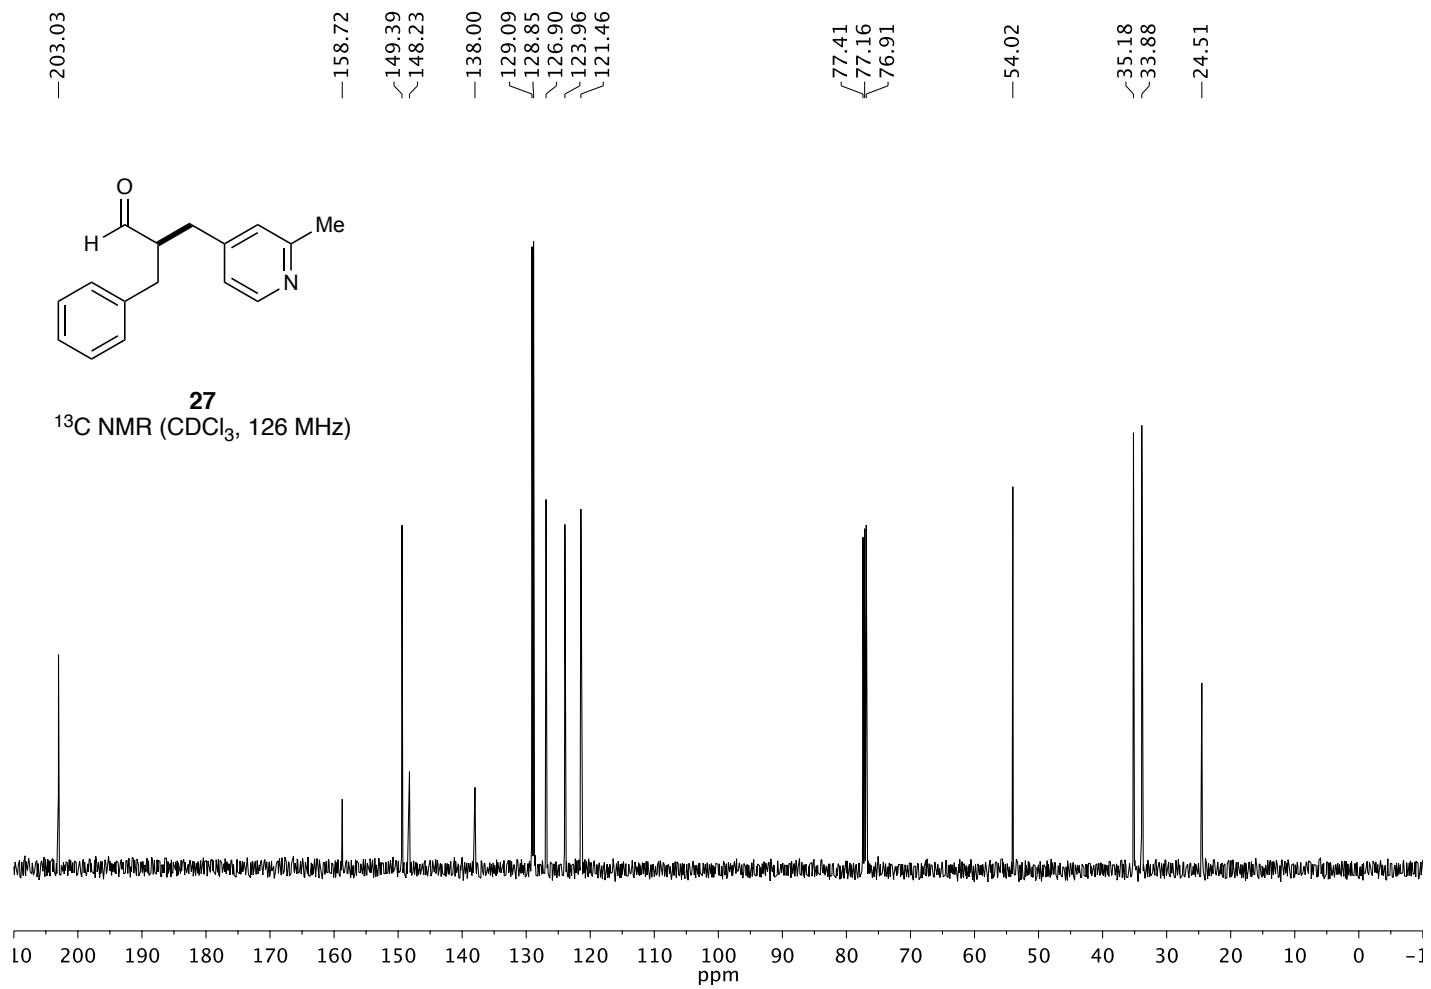

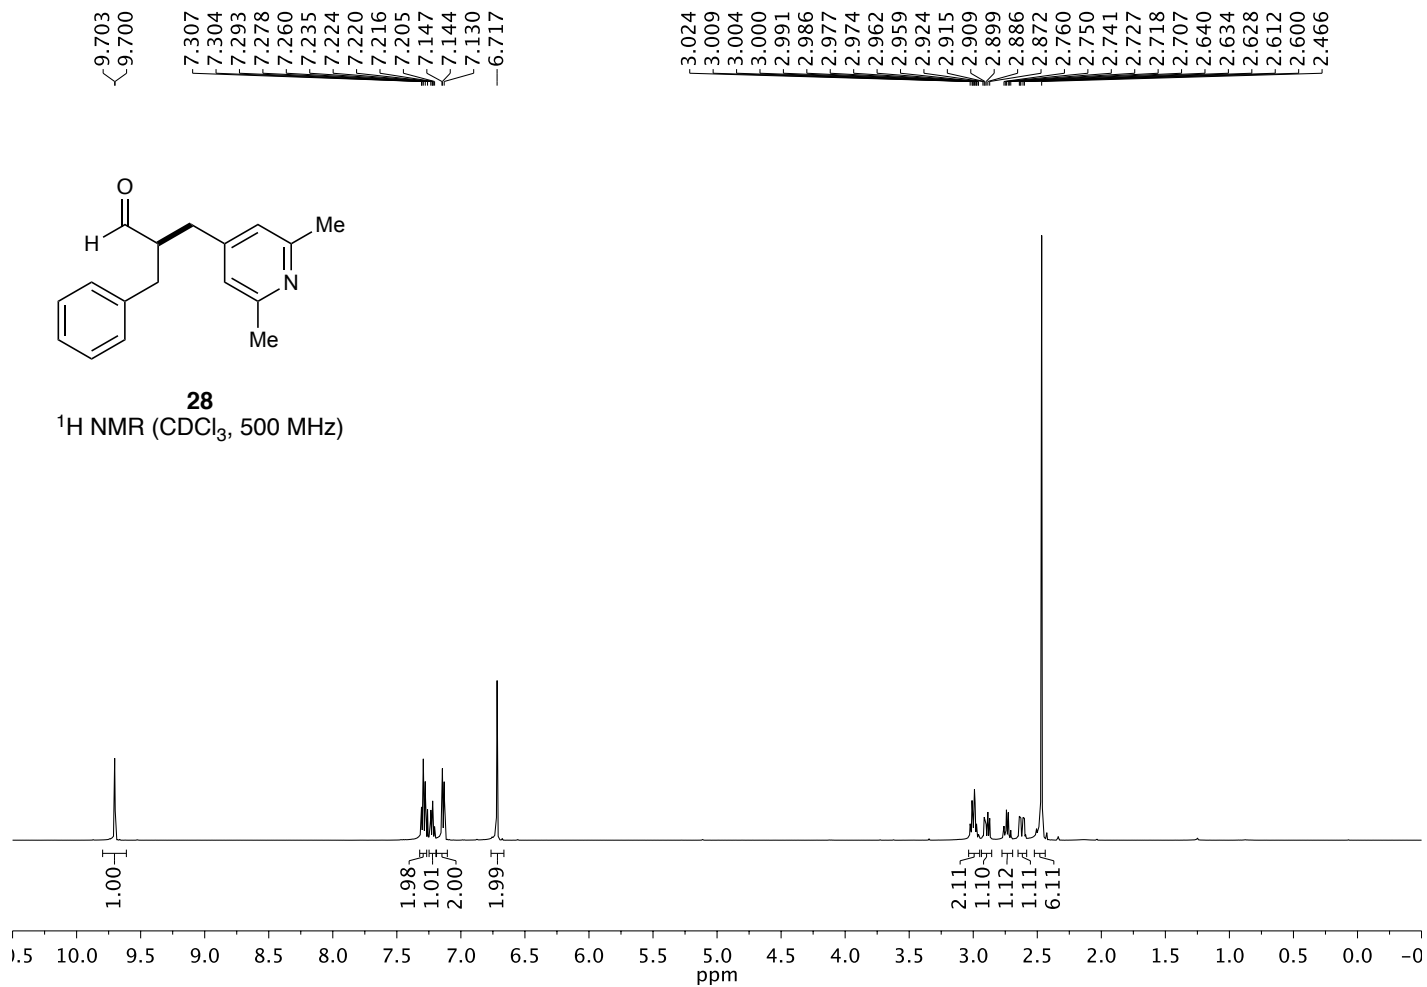

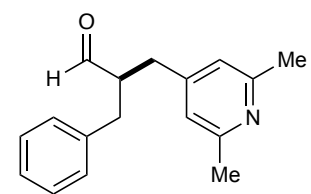

**28**  
 $^{13}\text{C}$  NMR ( $\text{CDCl}_3$ , 126 MHz)

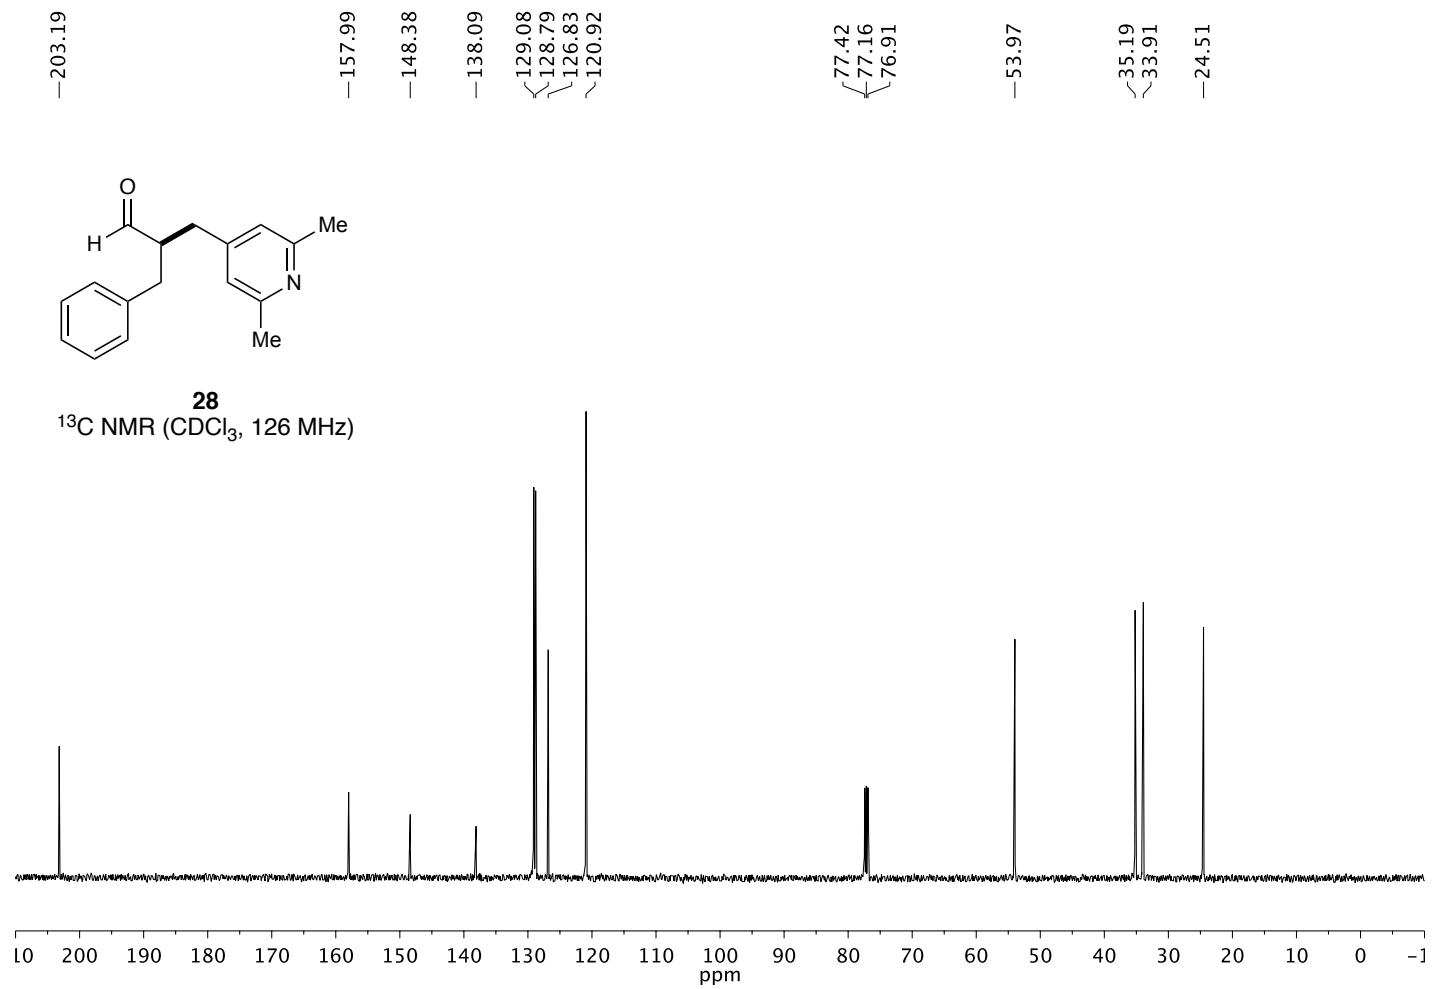

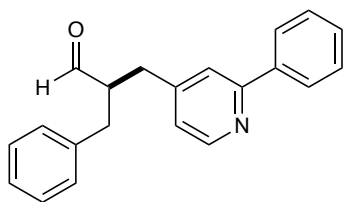

**29**  
 $^1\text{H NMR}$  ( $\text{CDCl}_3$ , 500 MHz)

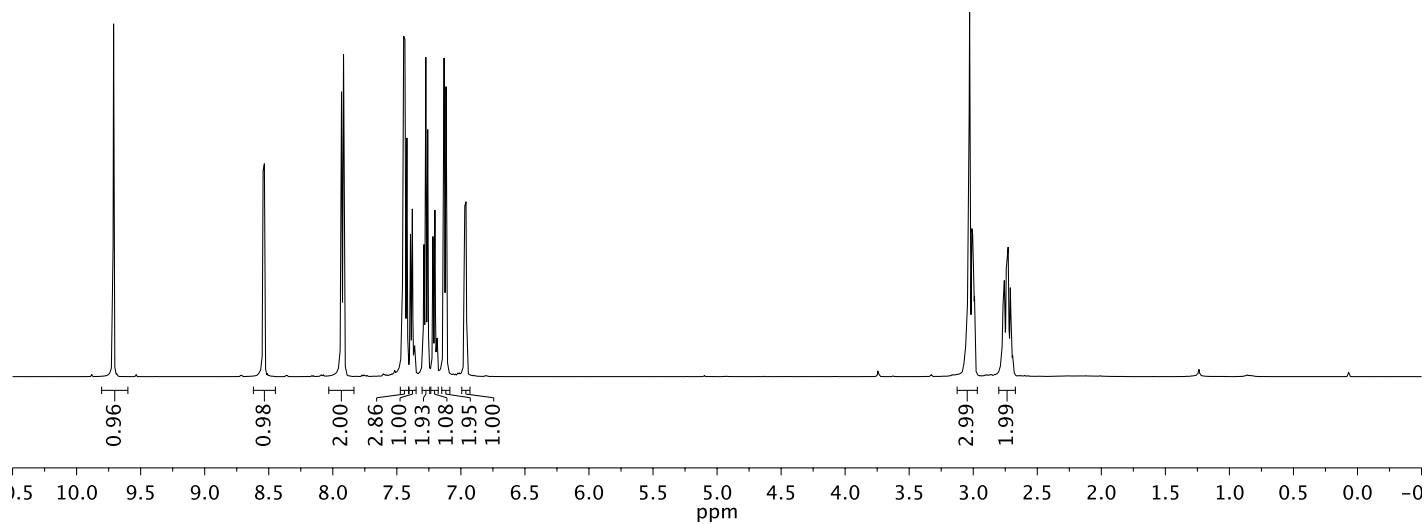

9.711

8.544  
8.534

7.931  
7.916

7.447  
7.437

7.422  
7.393

7.379  
7.364

7.289  
7.274

7.259  
7.218

7.203  
7.188

7.131  
7.116

6.969  
6.960

3.070  
3.054

3.029  
3.011

3.004  
2.997

2.989  
2.768

2.757  
2.743

2.736  
2.727

2.710  
2.692



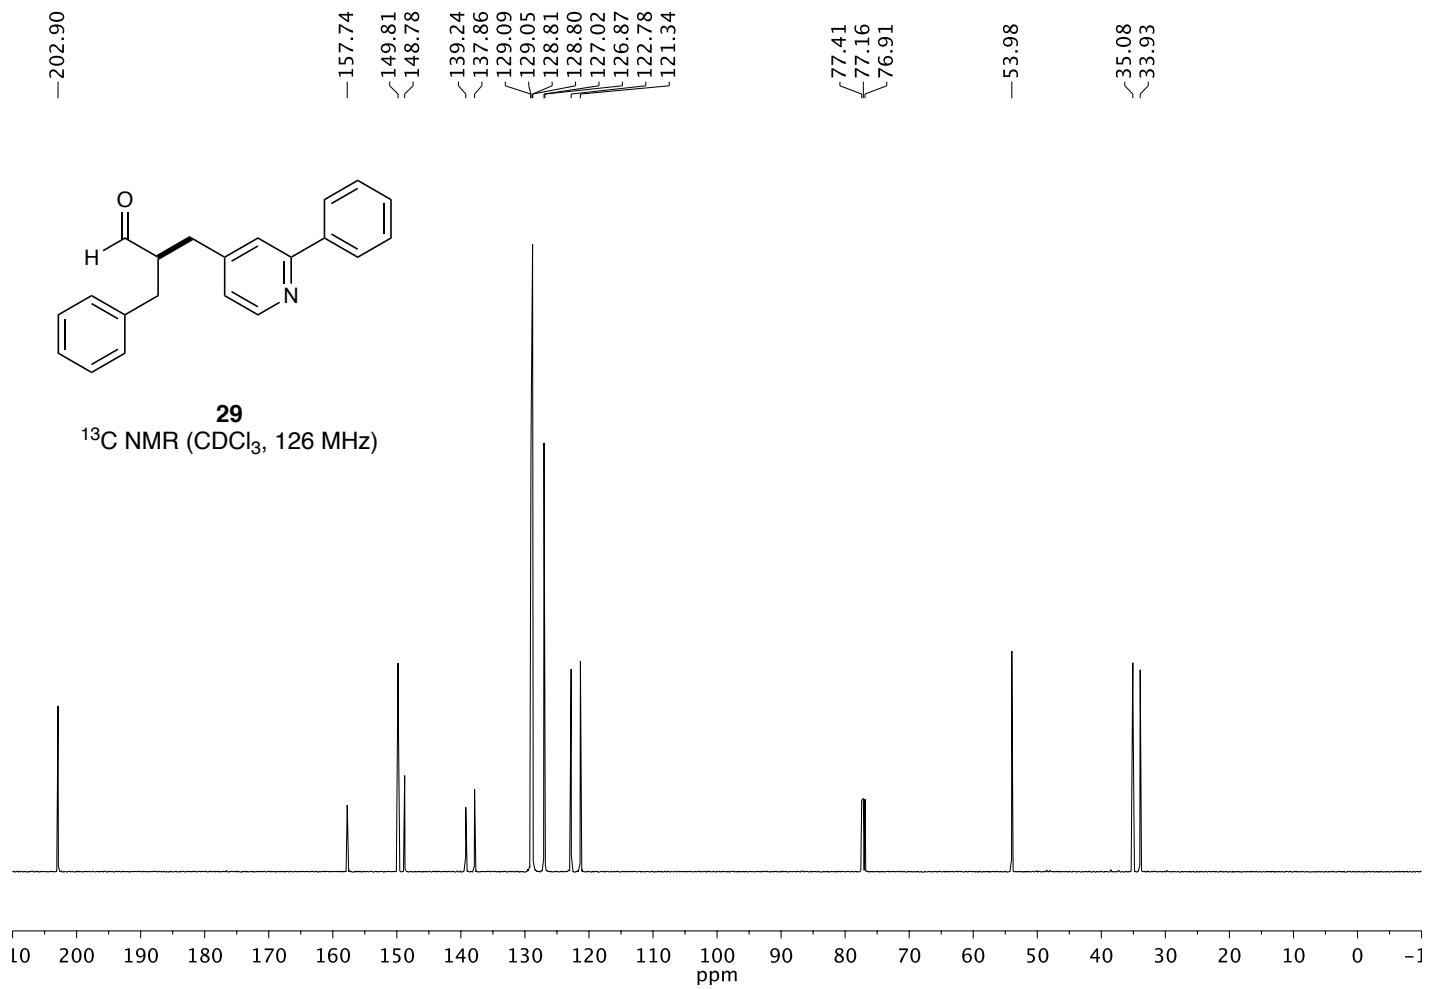

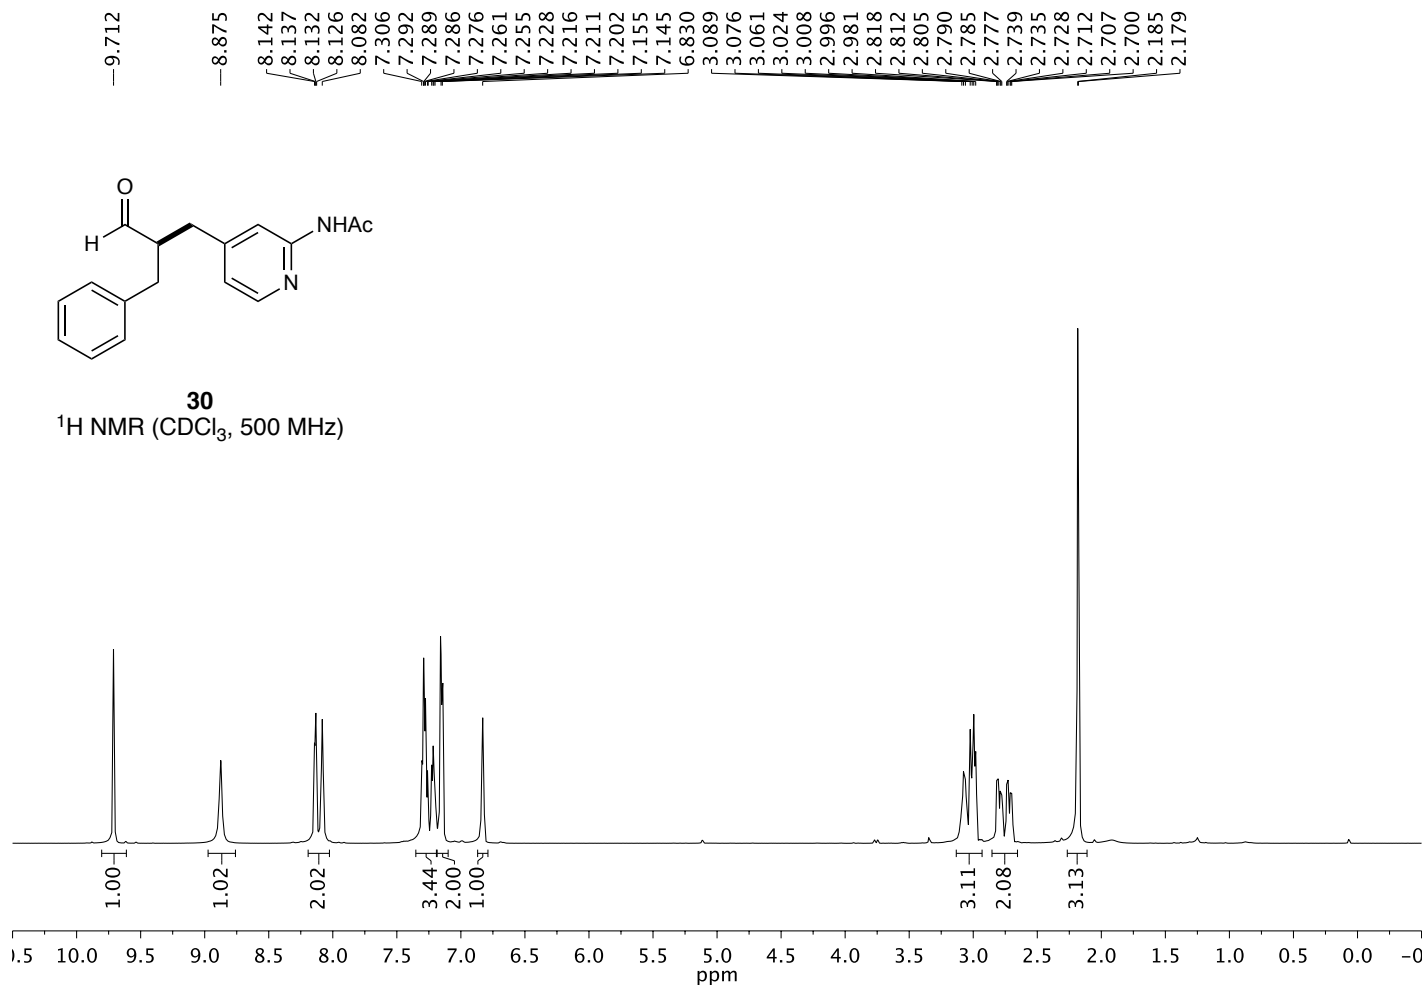

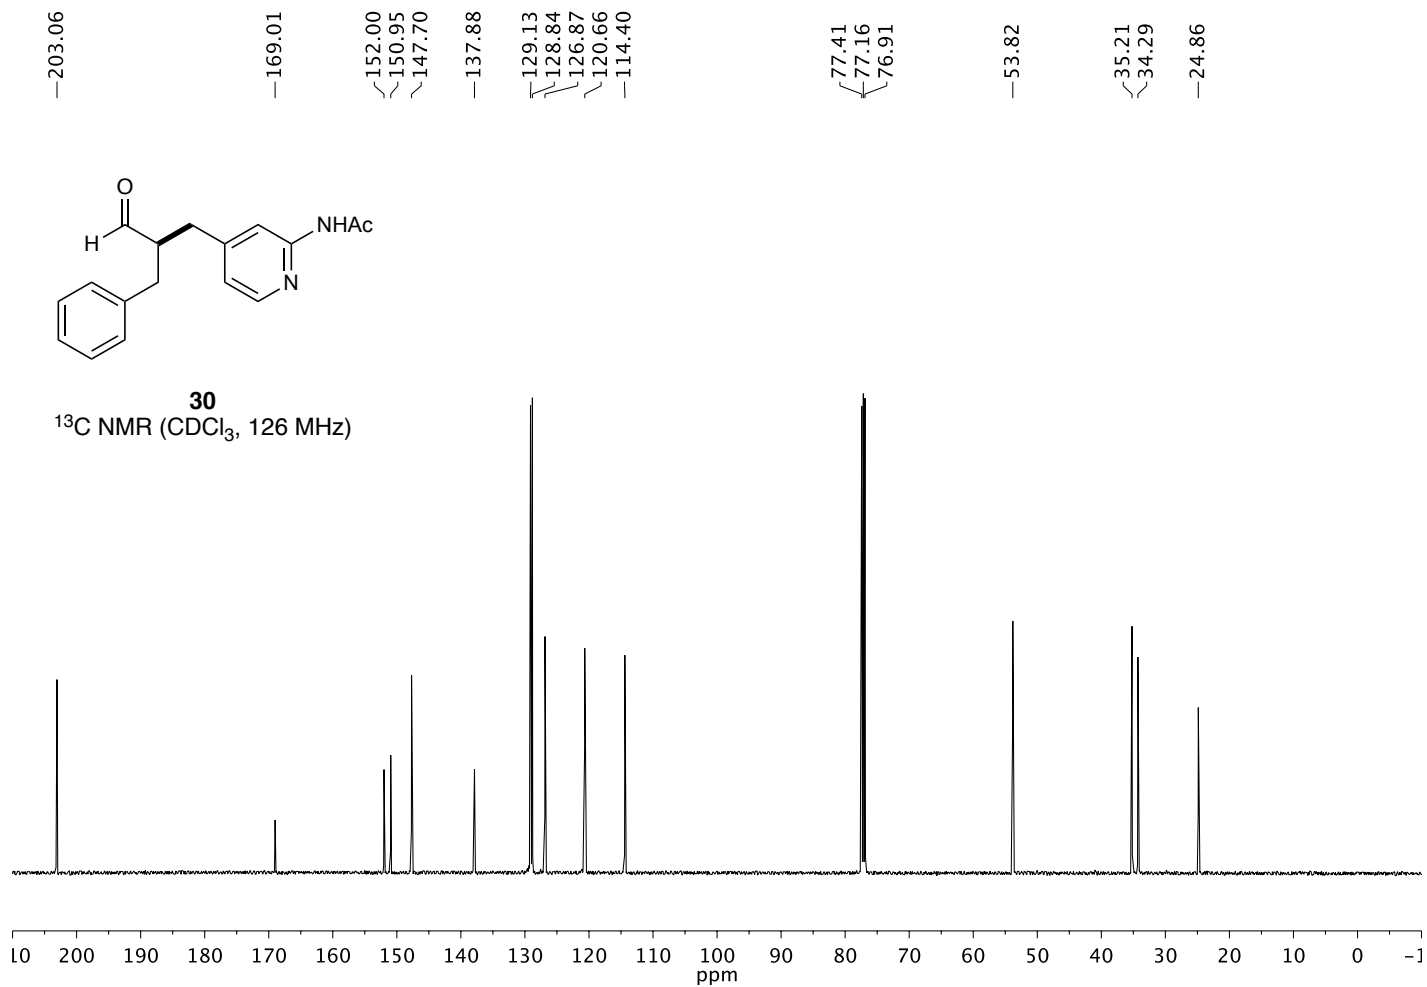

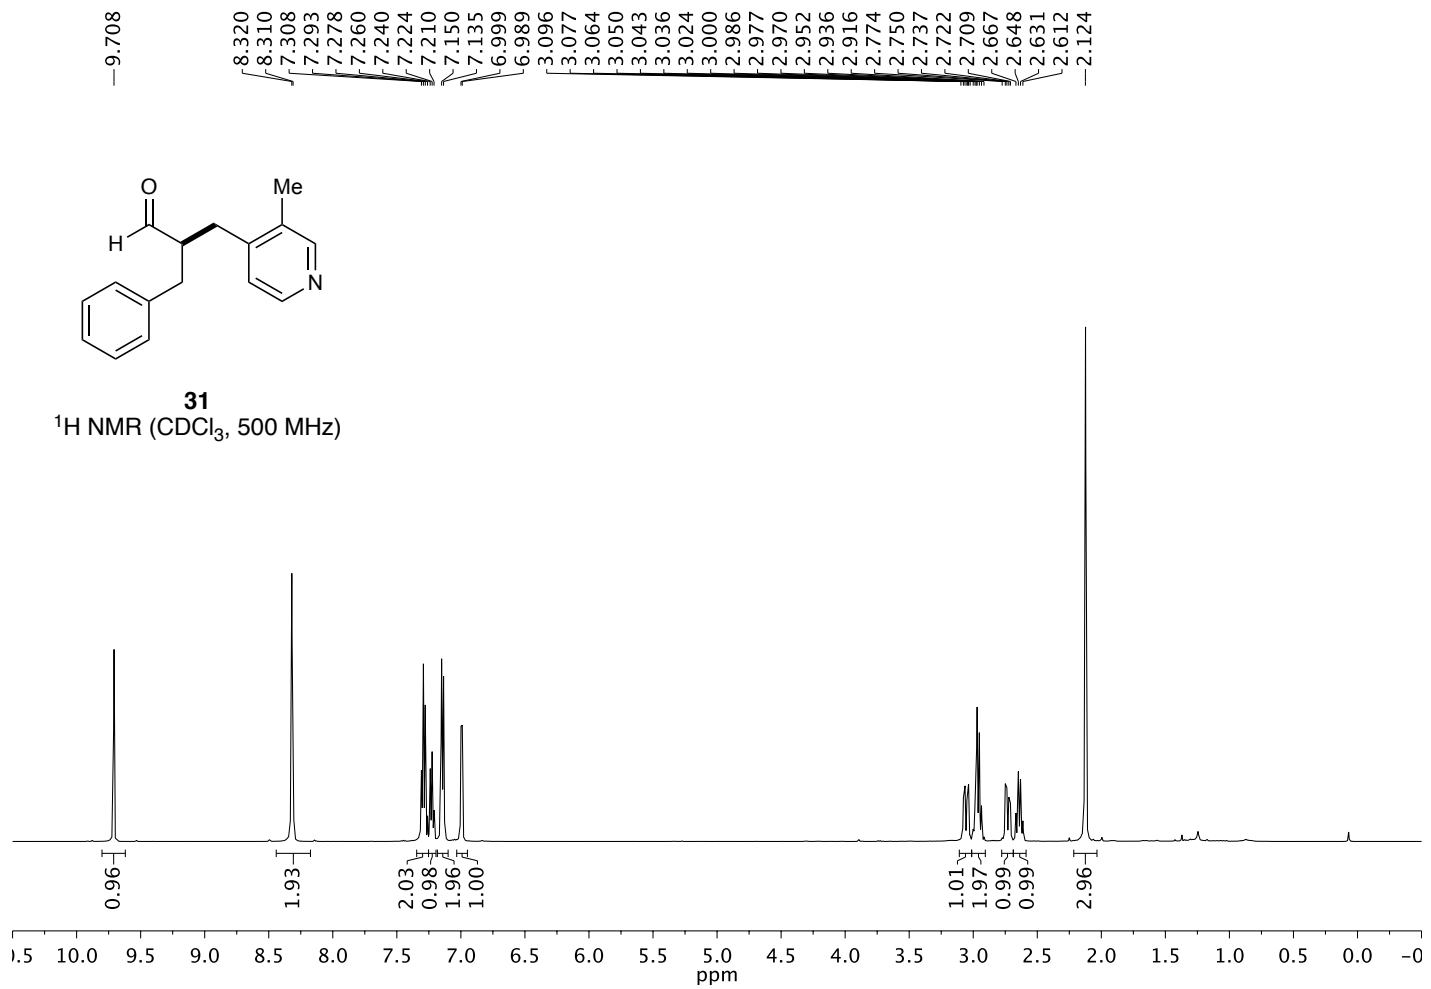

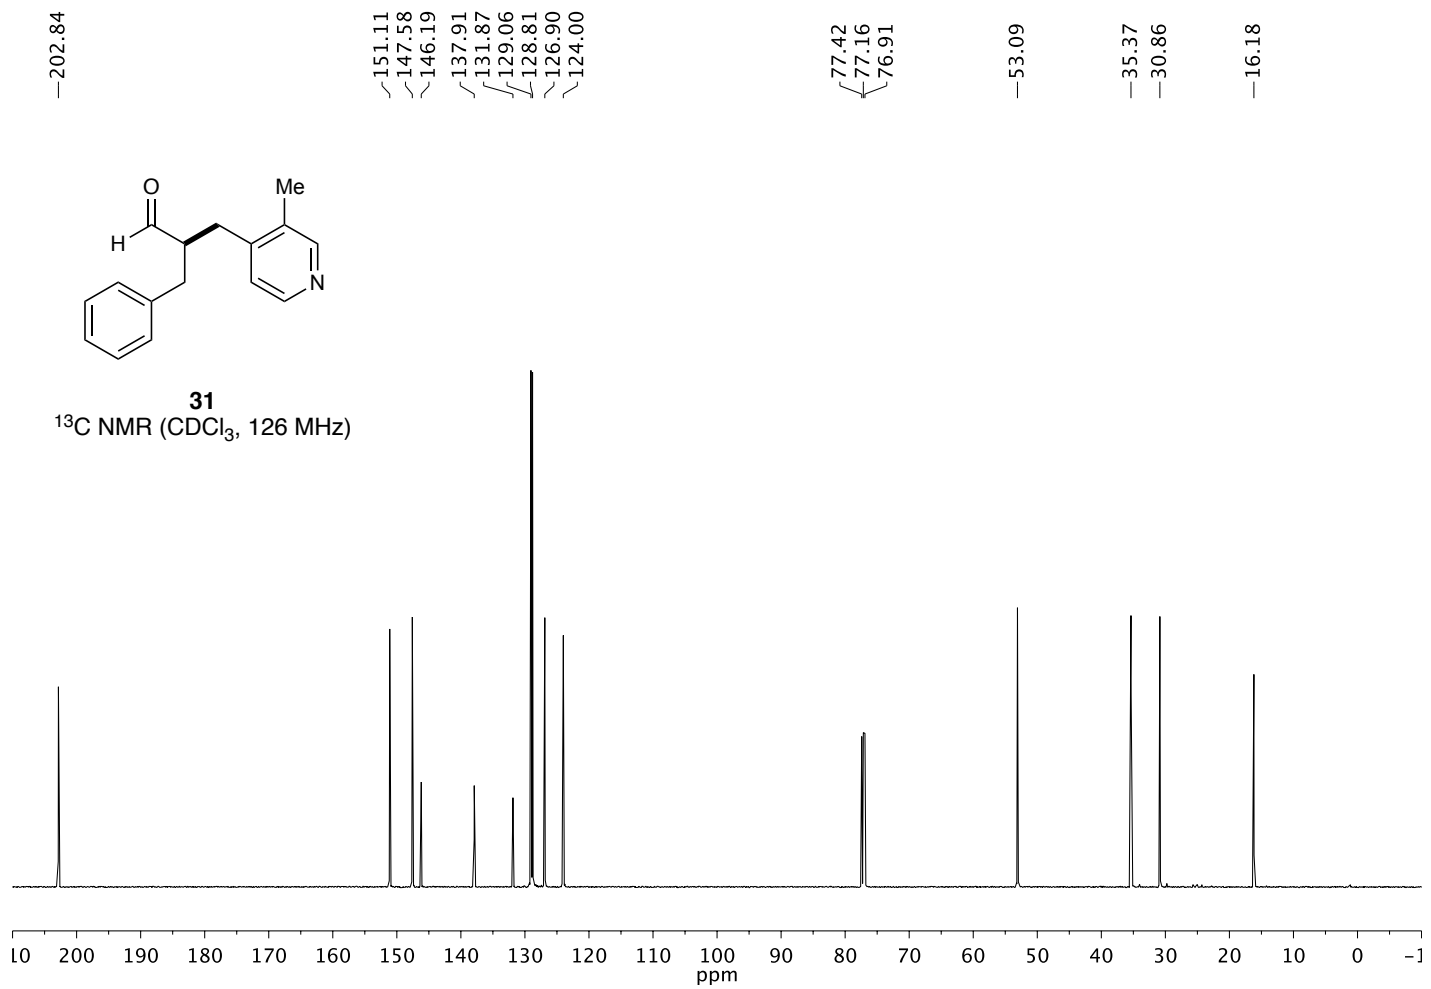

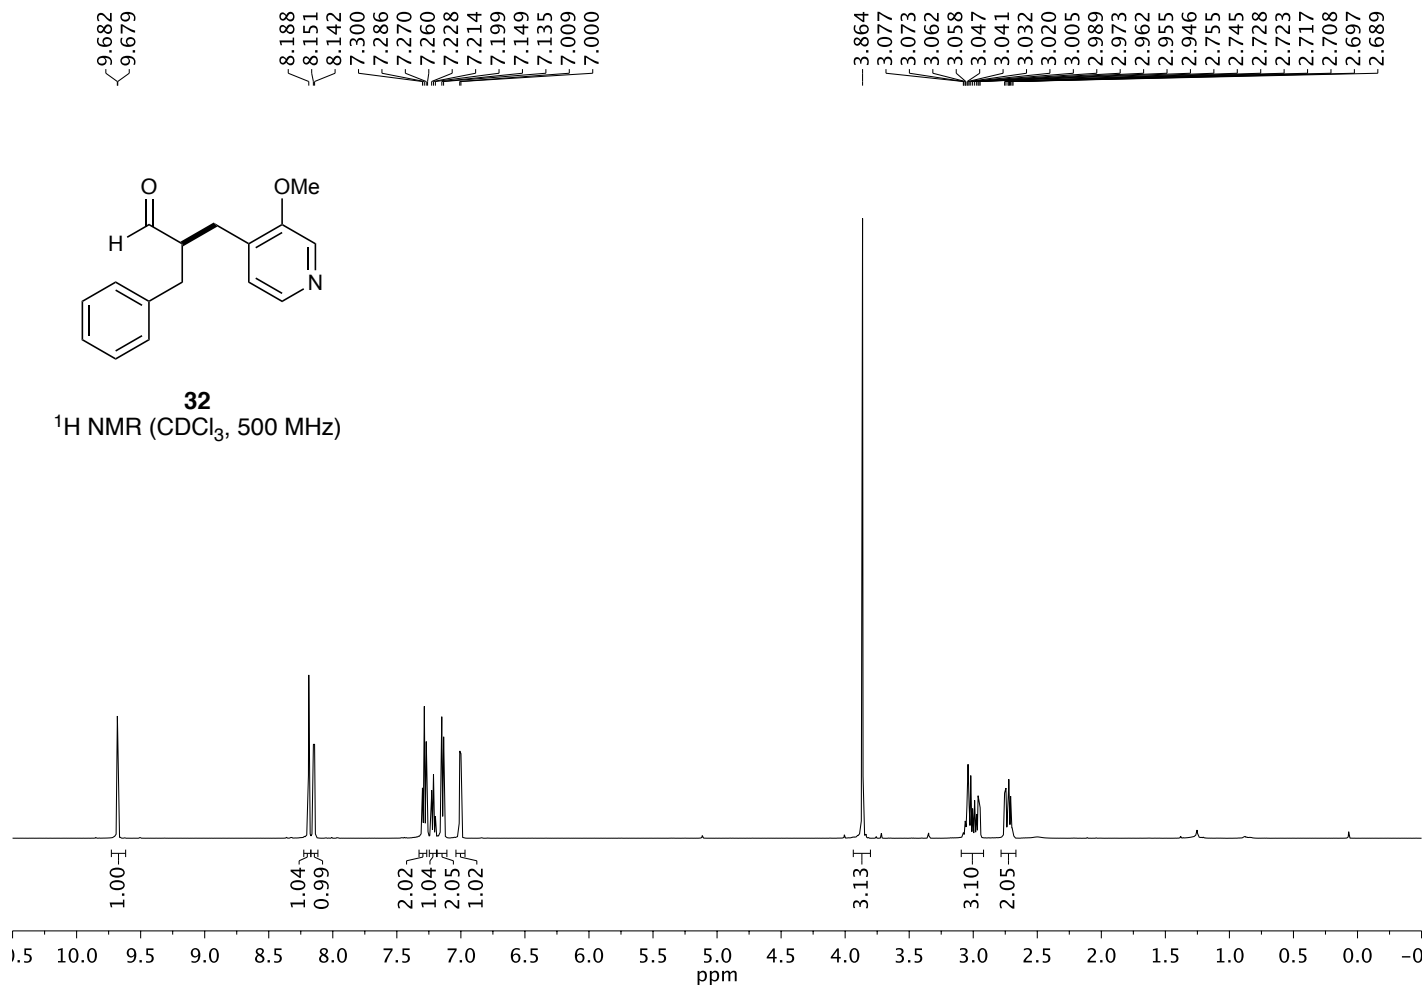

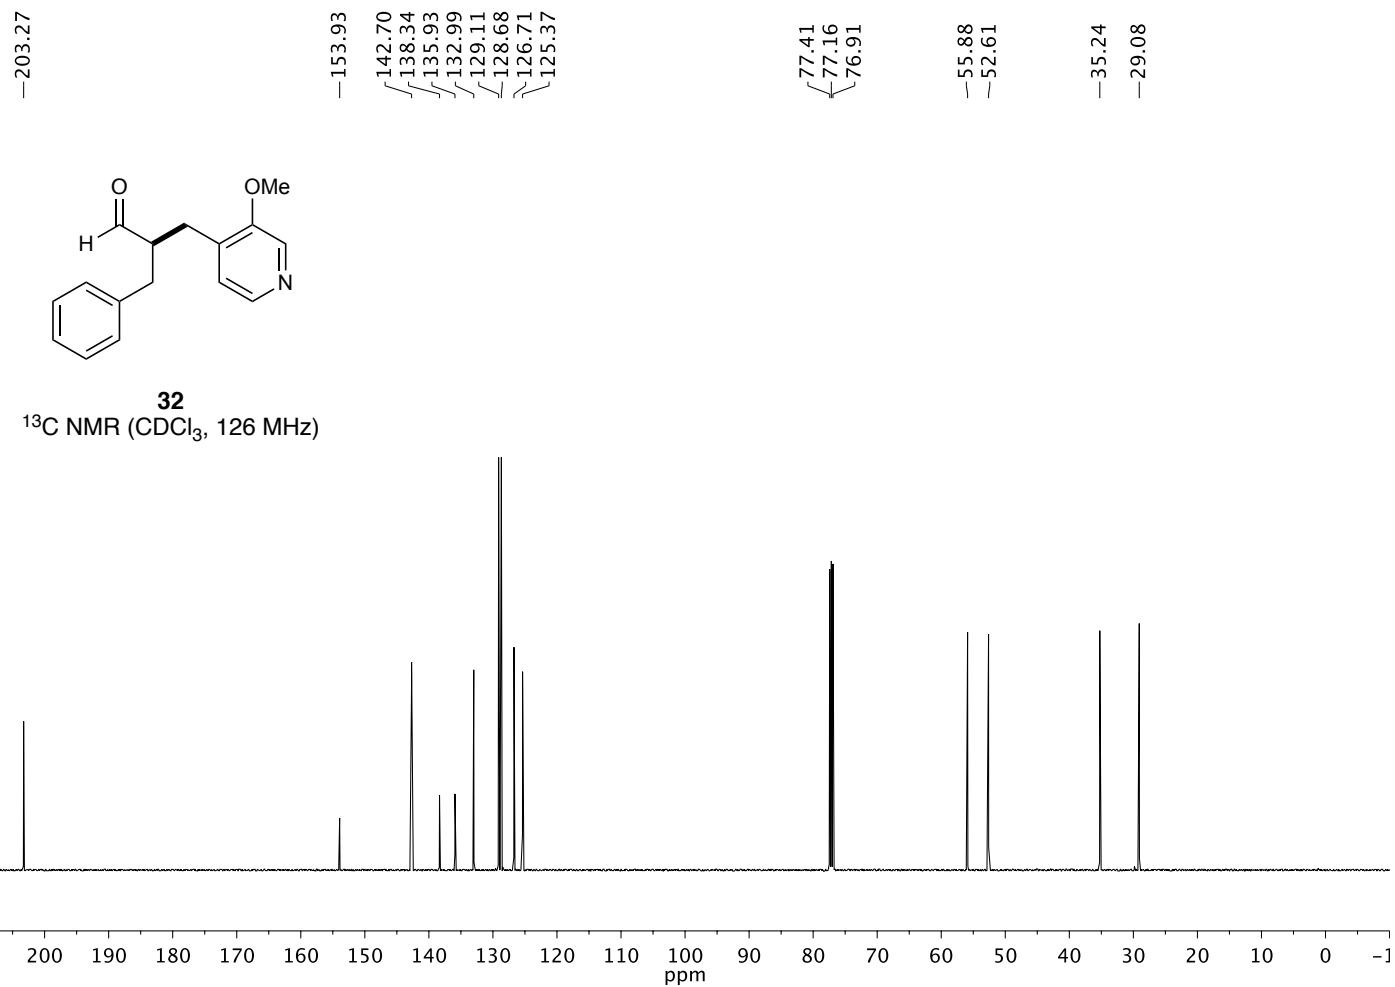

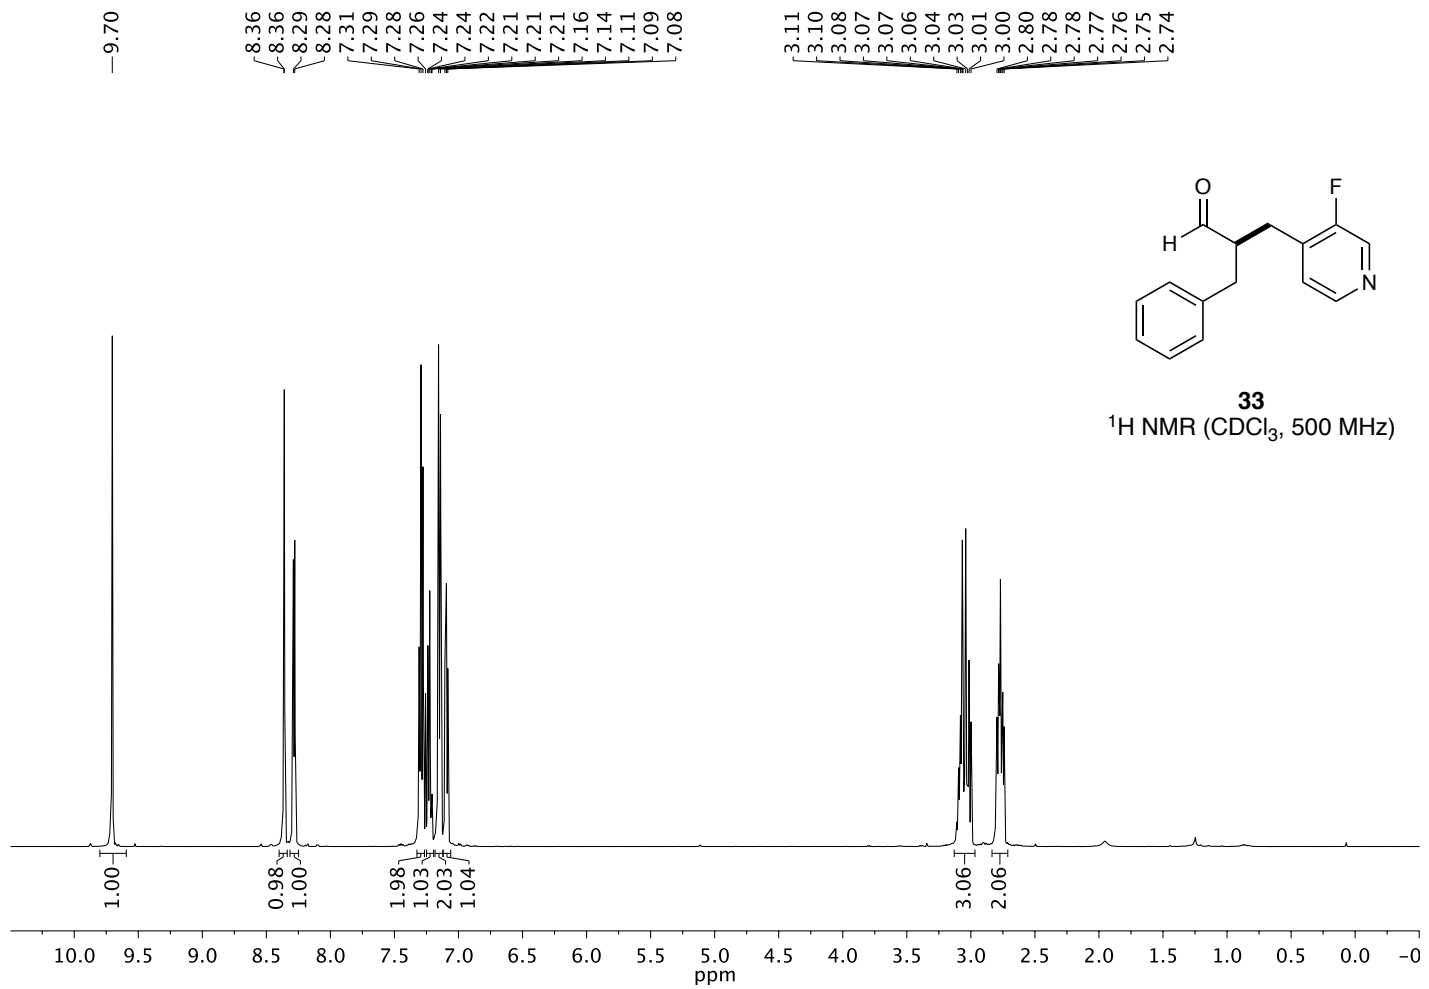



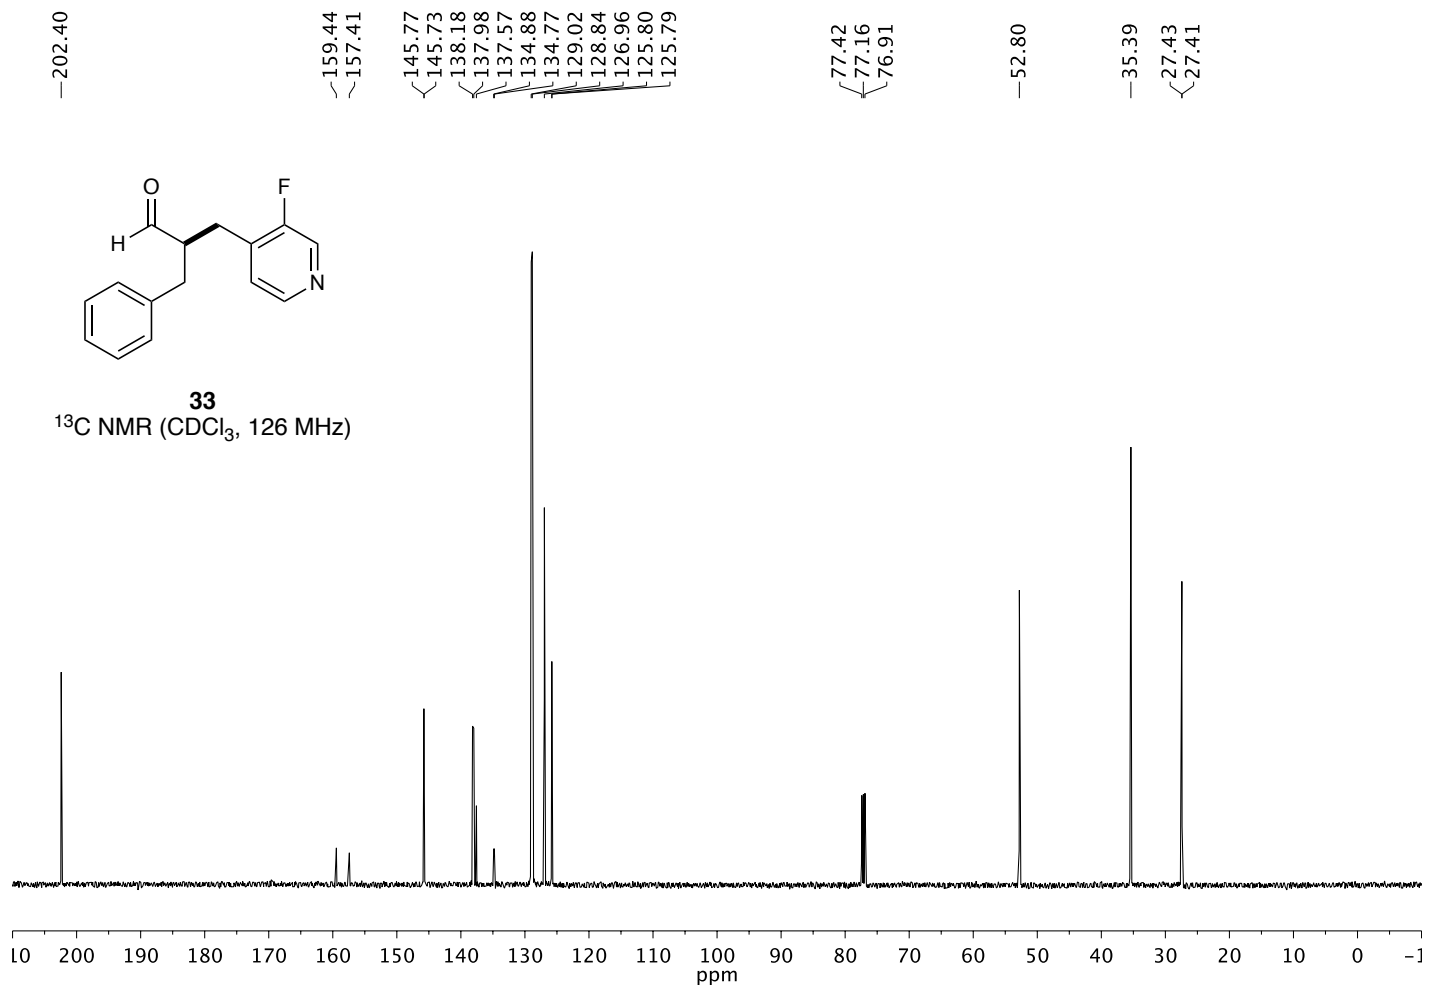

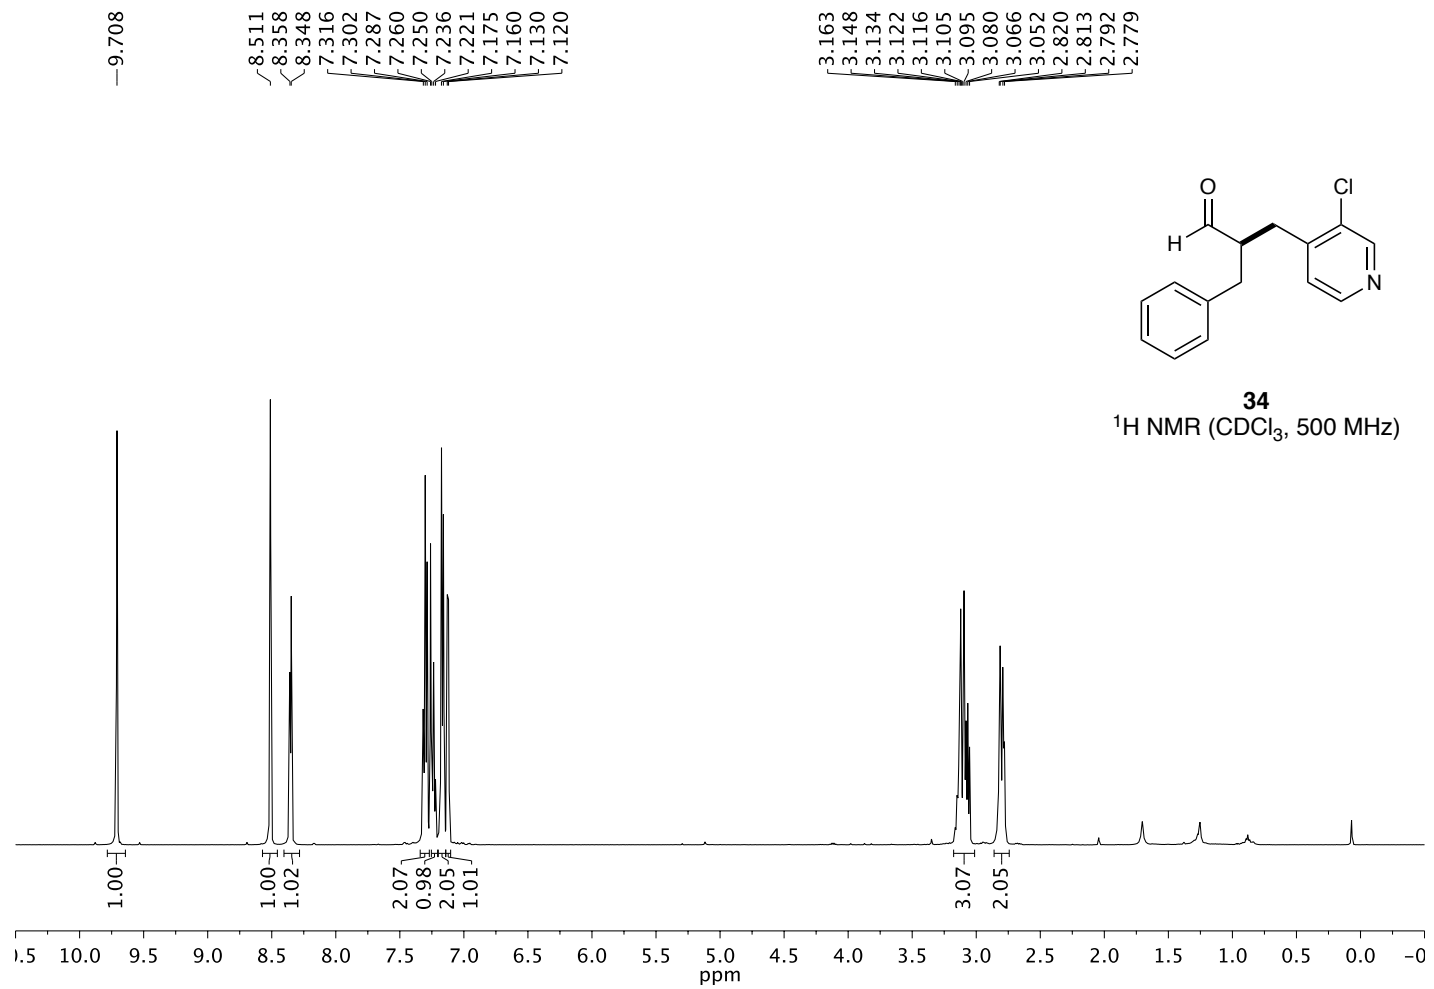

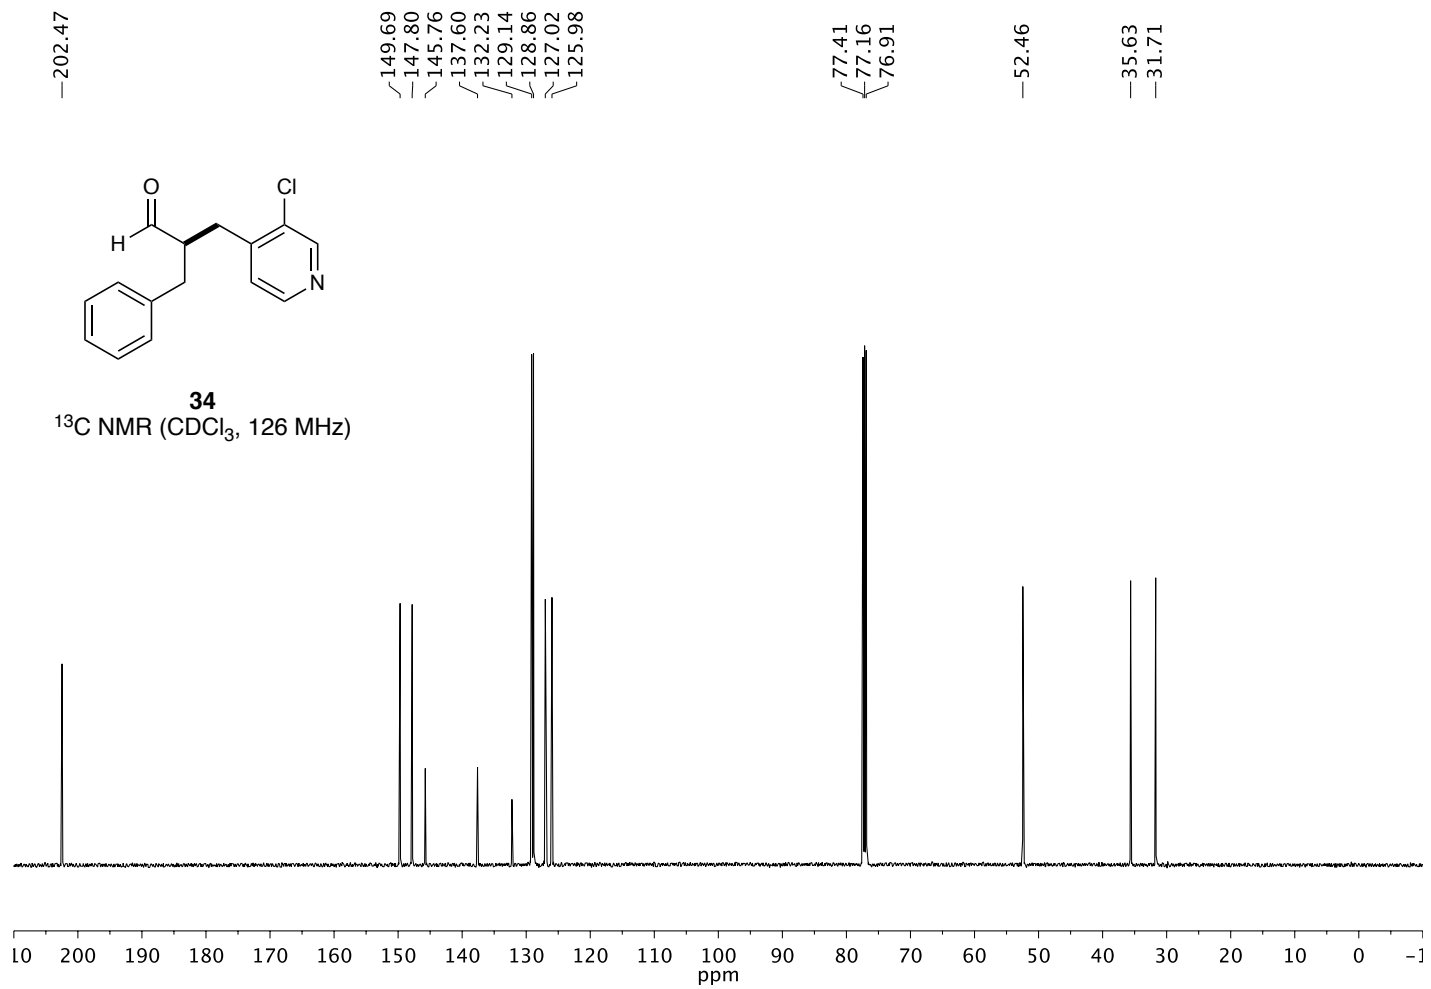

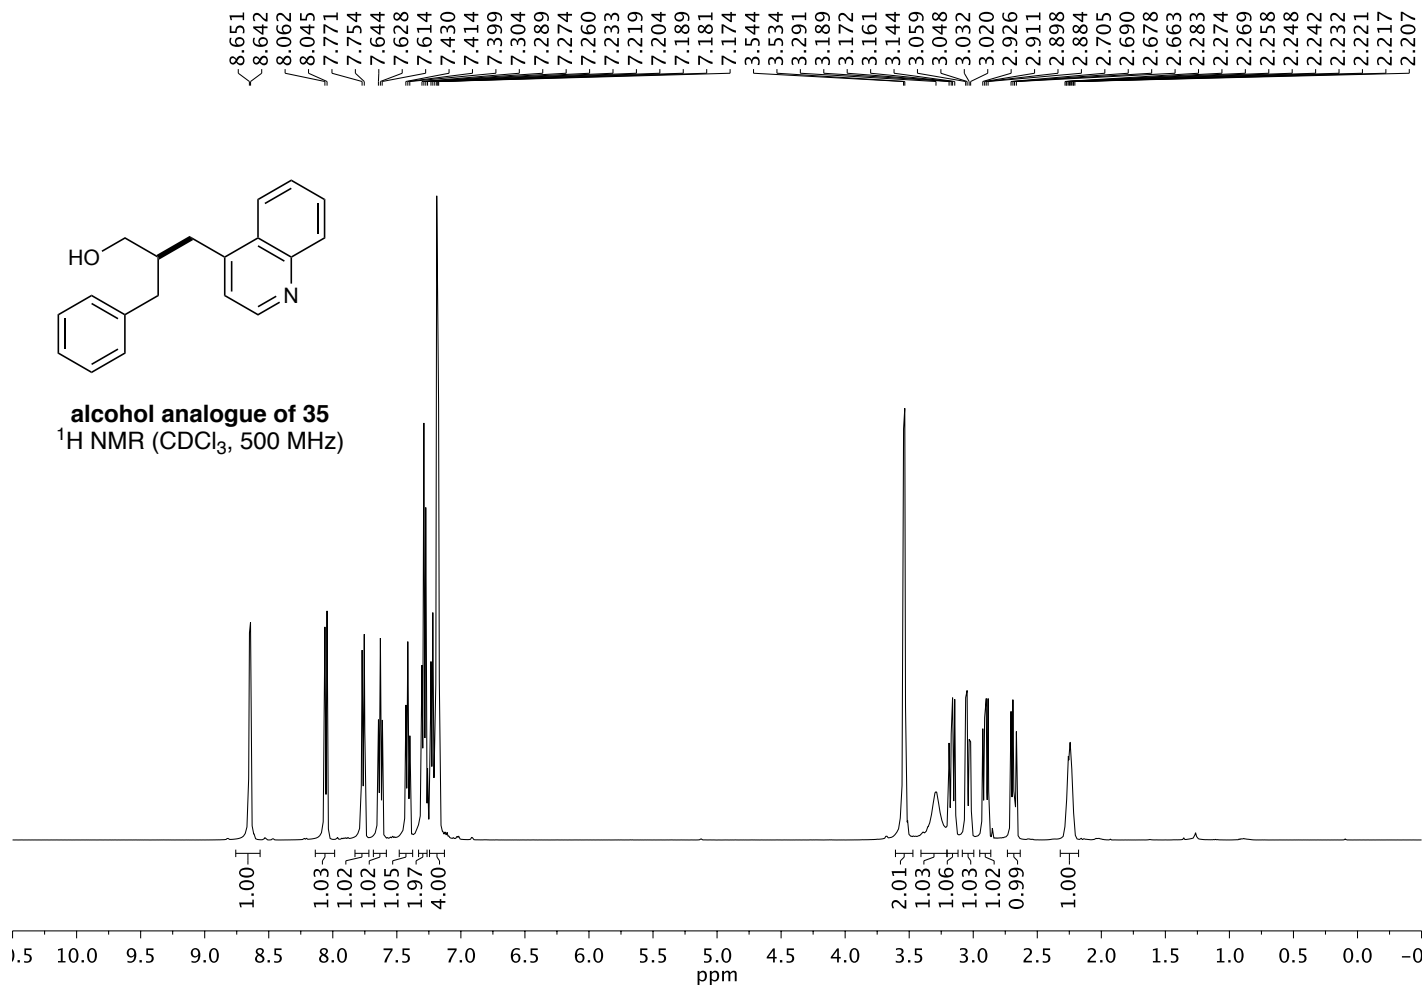

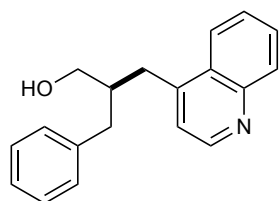

alcohol analogue of 35  
 $^{13}\text{C}$  NMR ( $\text{CDCl}_3$ , 126 MHz)

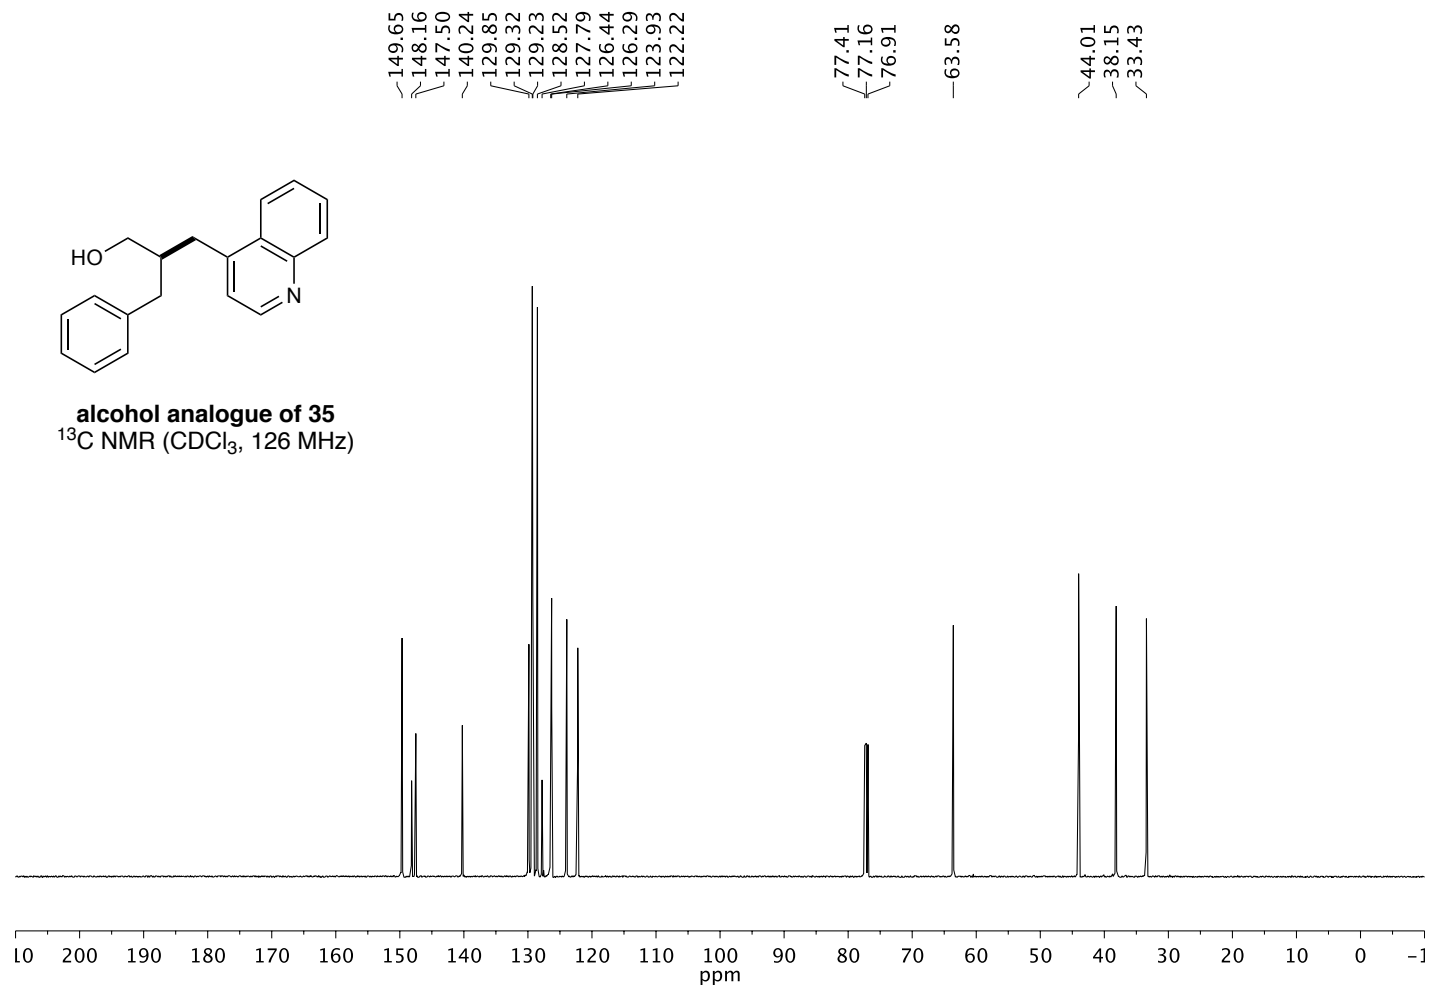

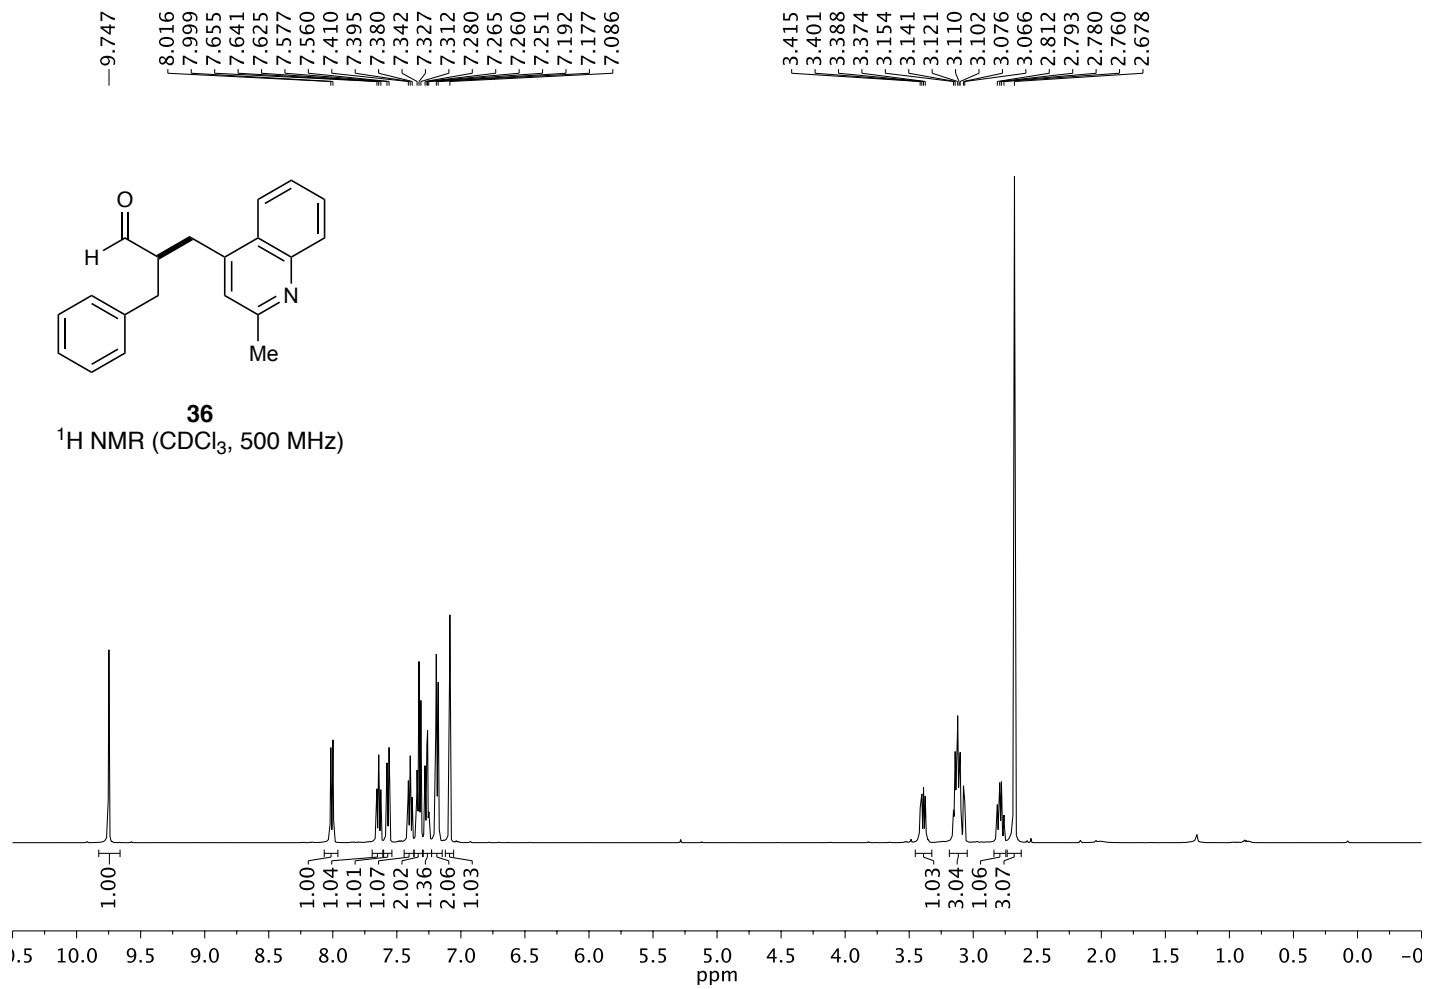

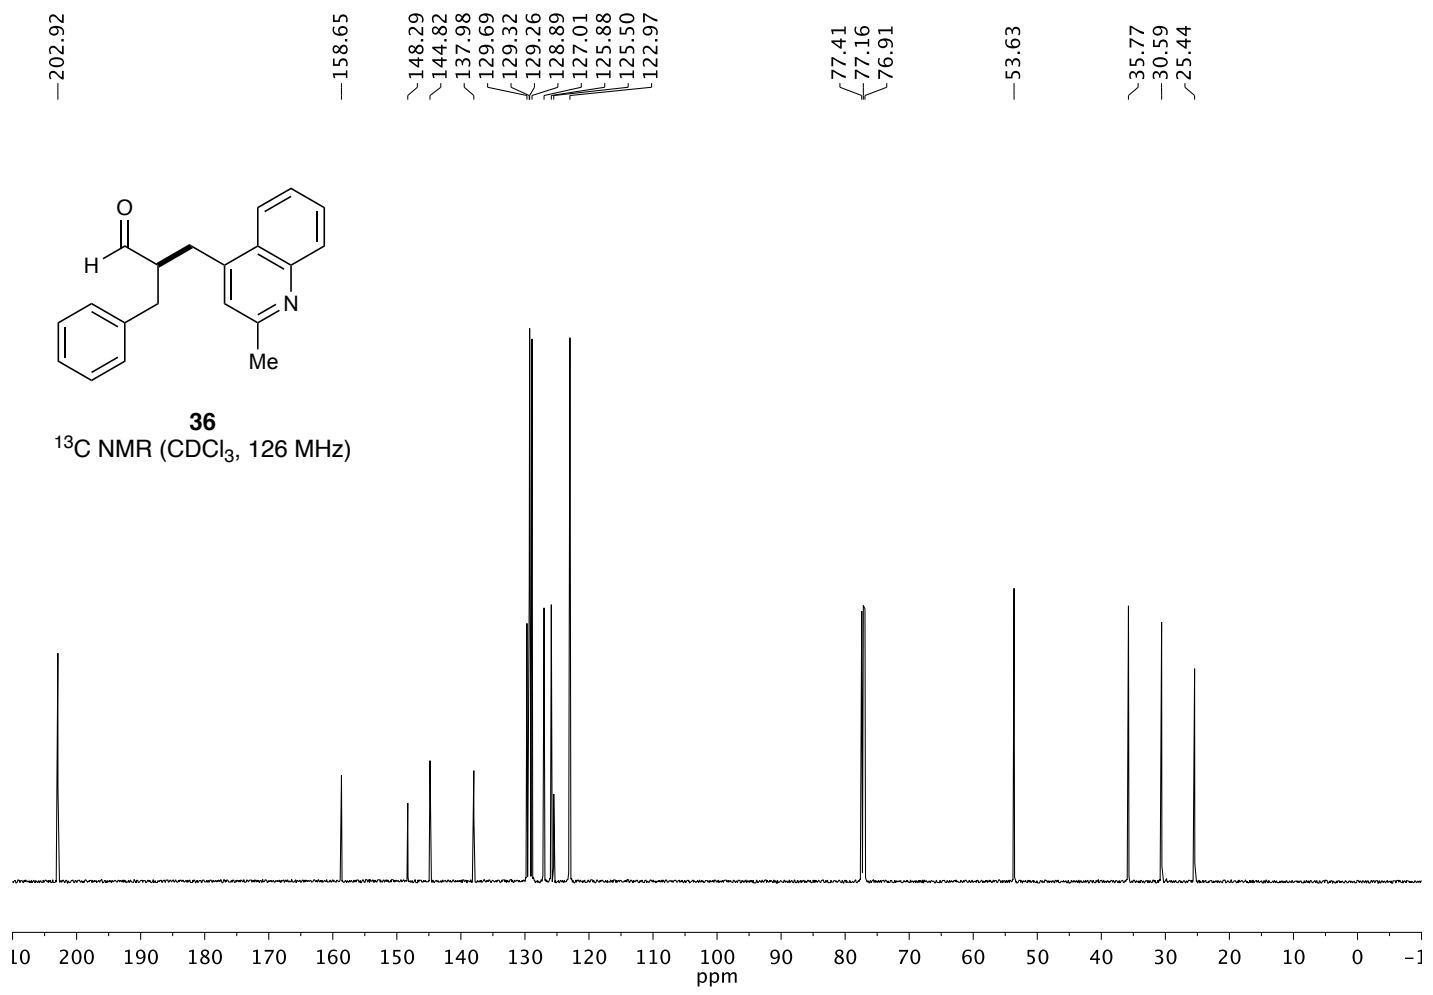

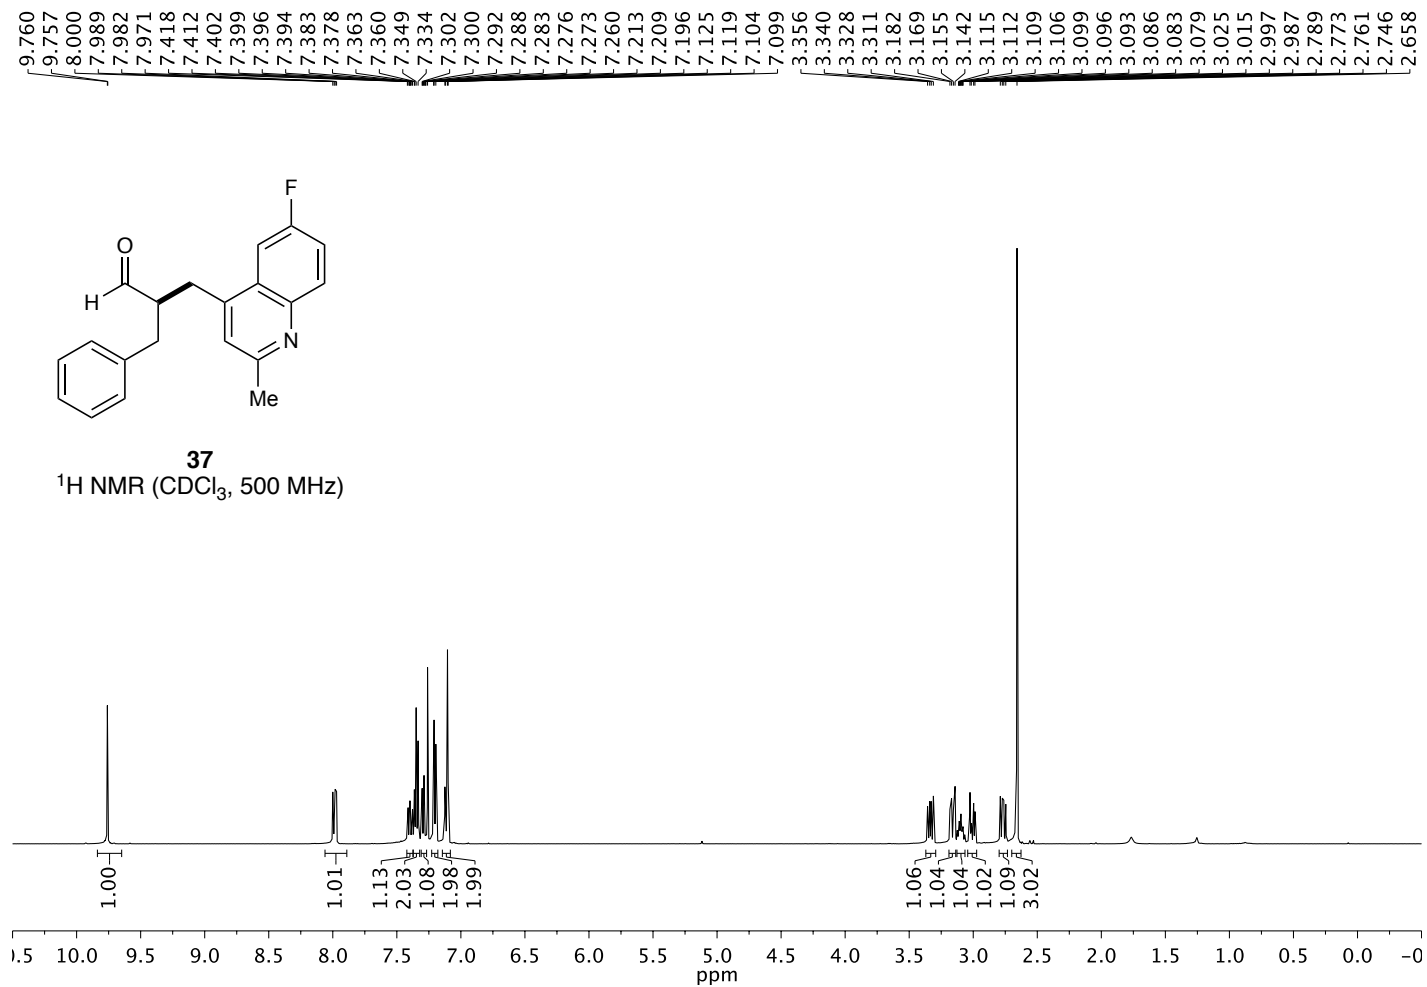



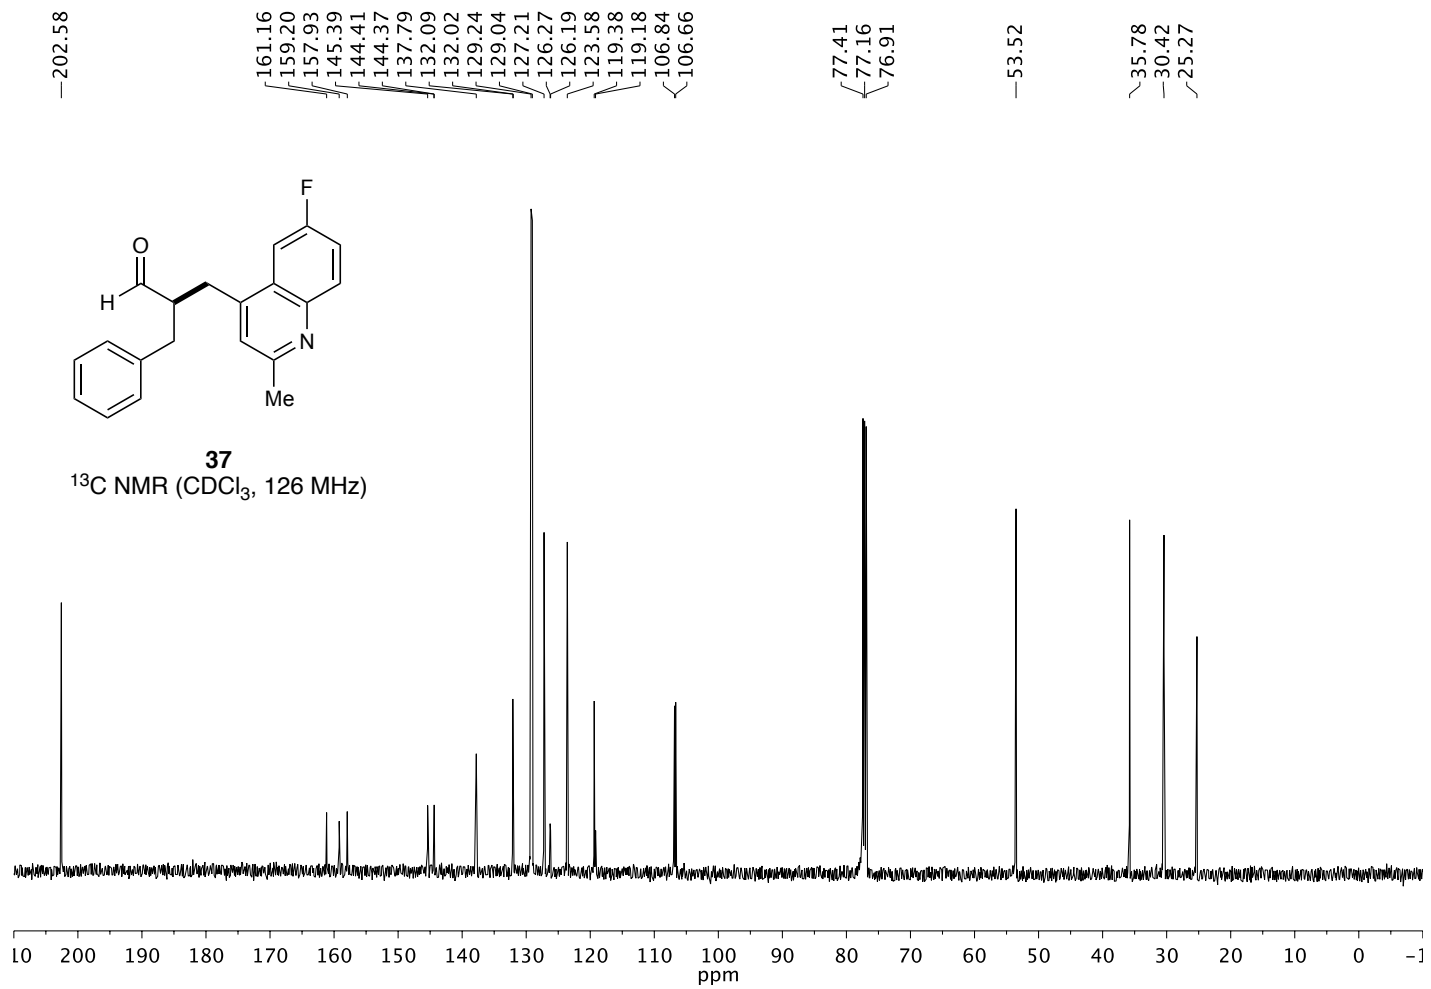

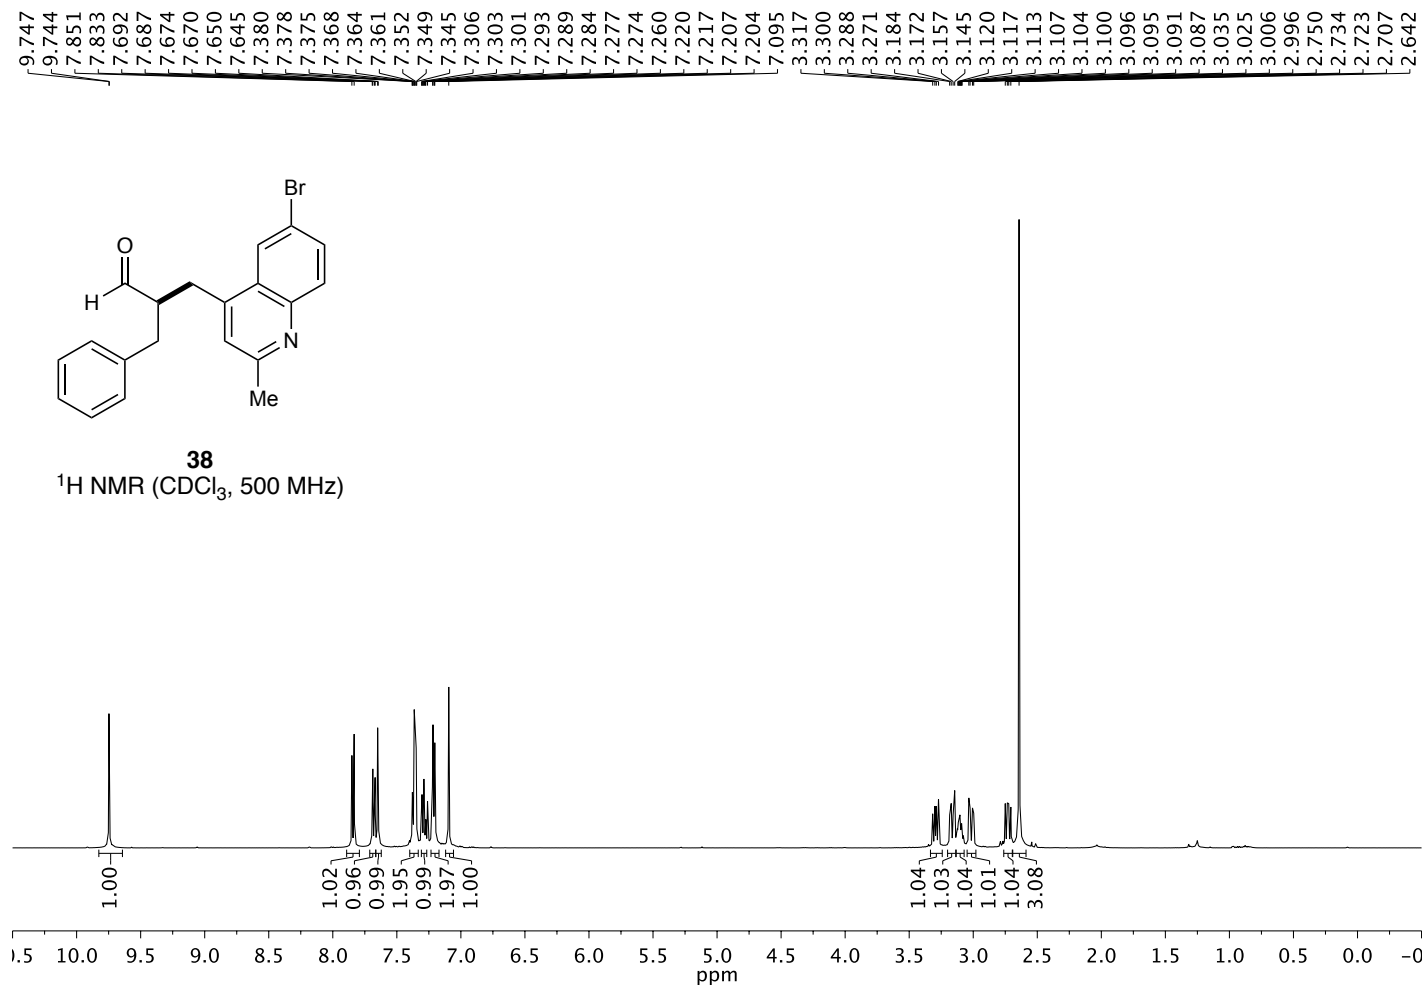

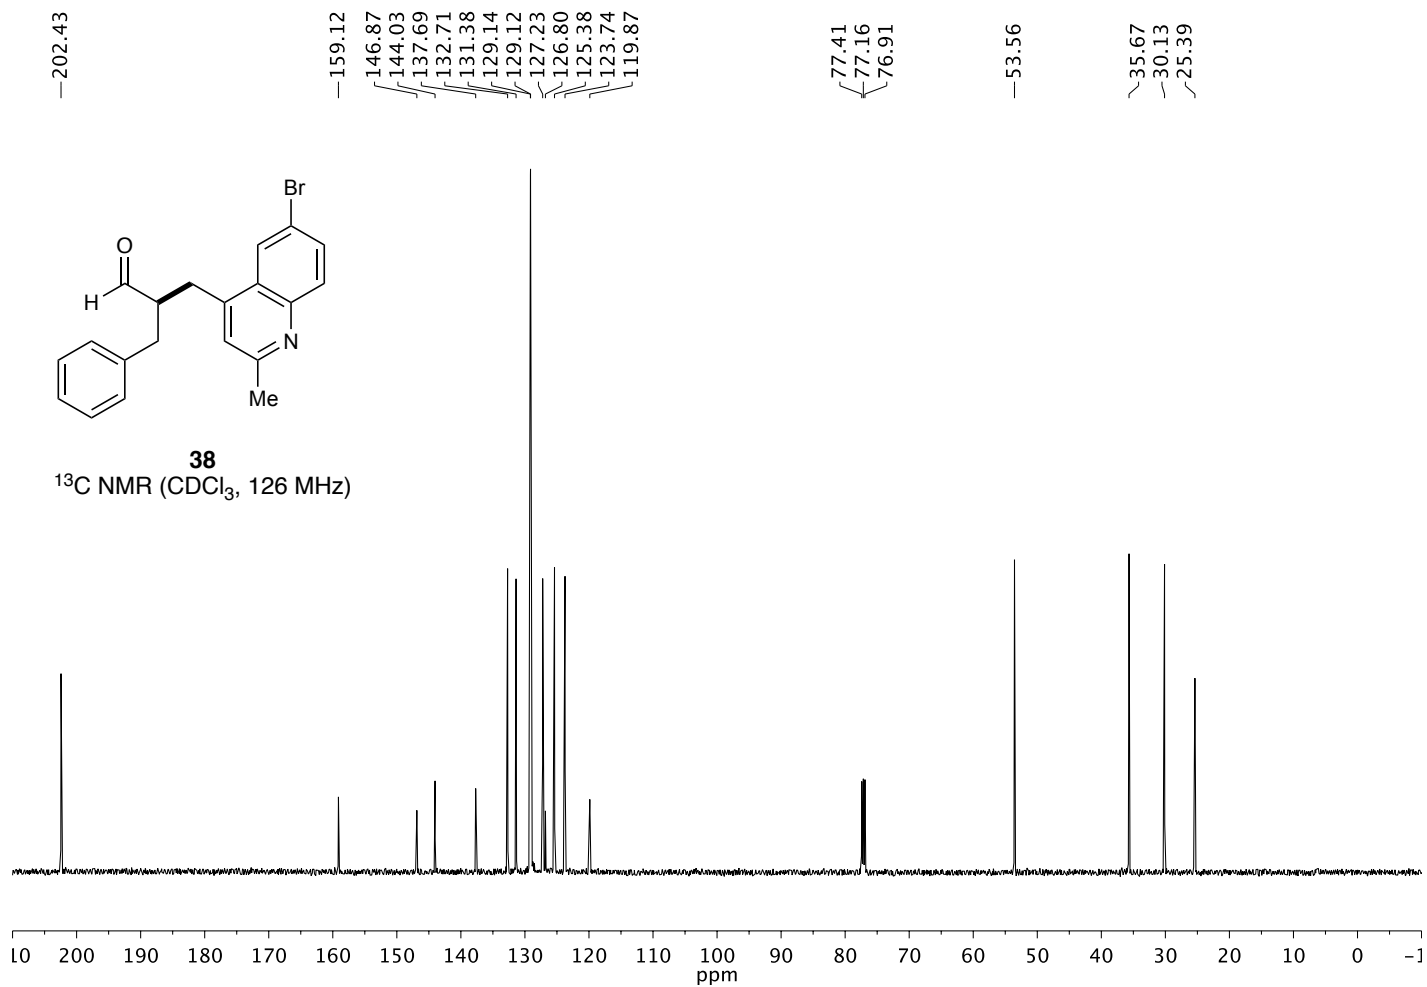

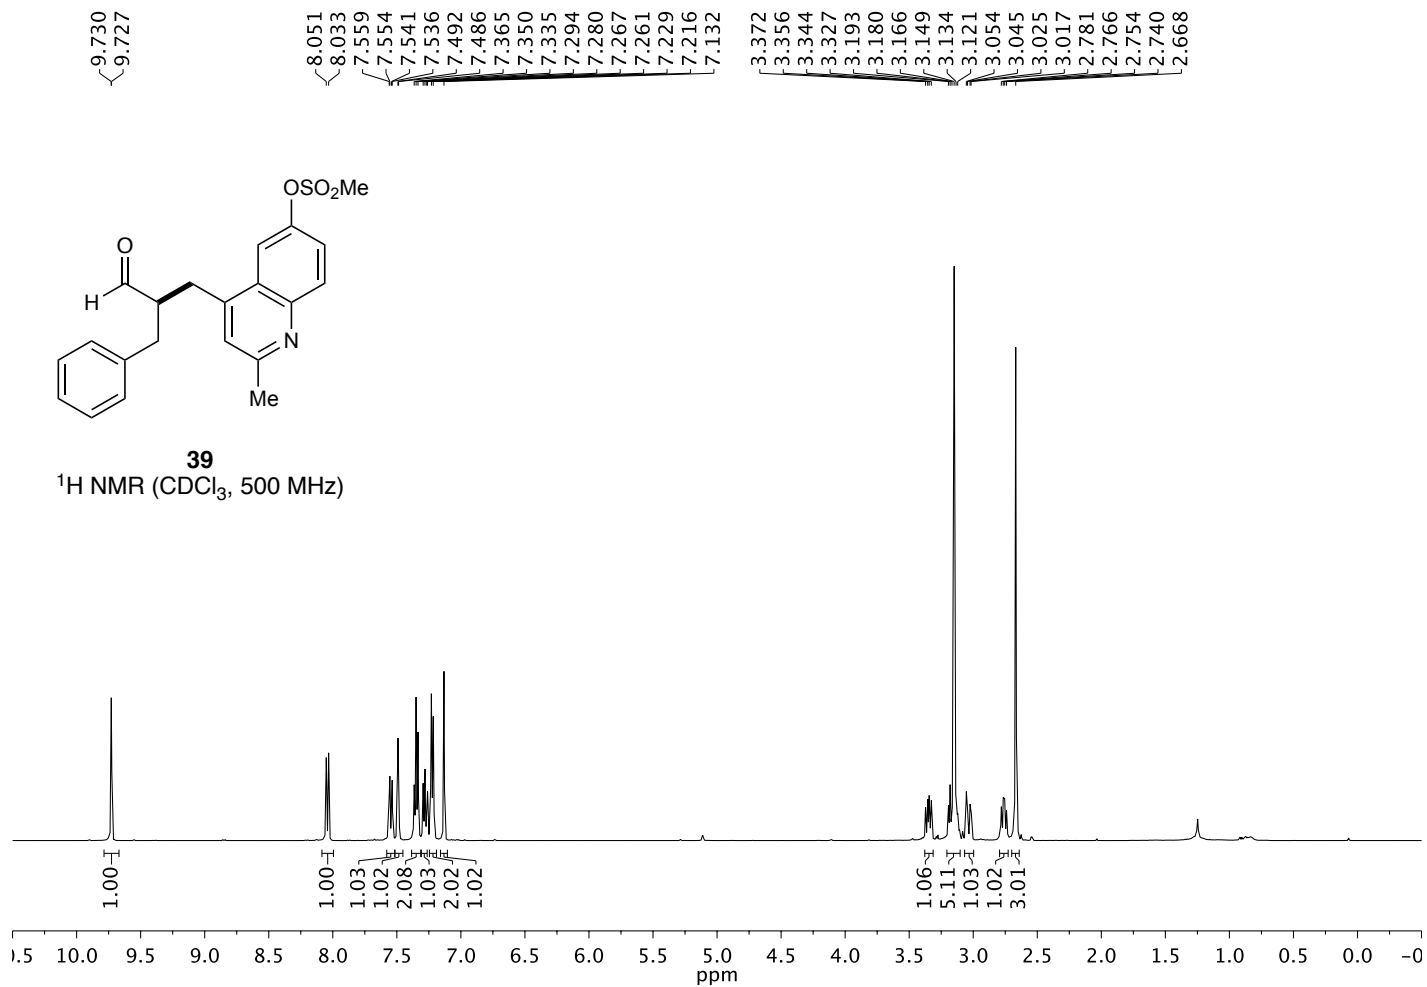

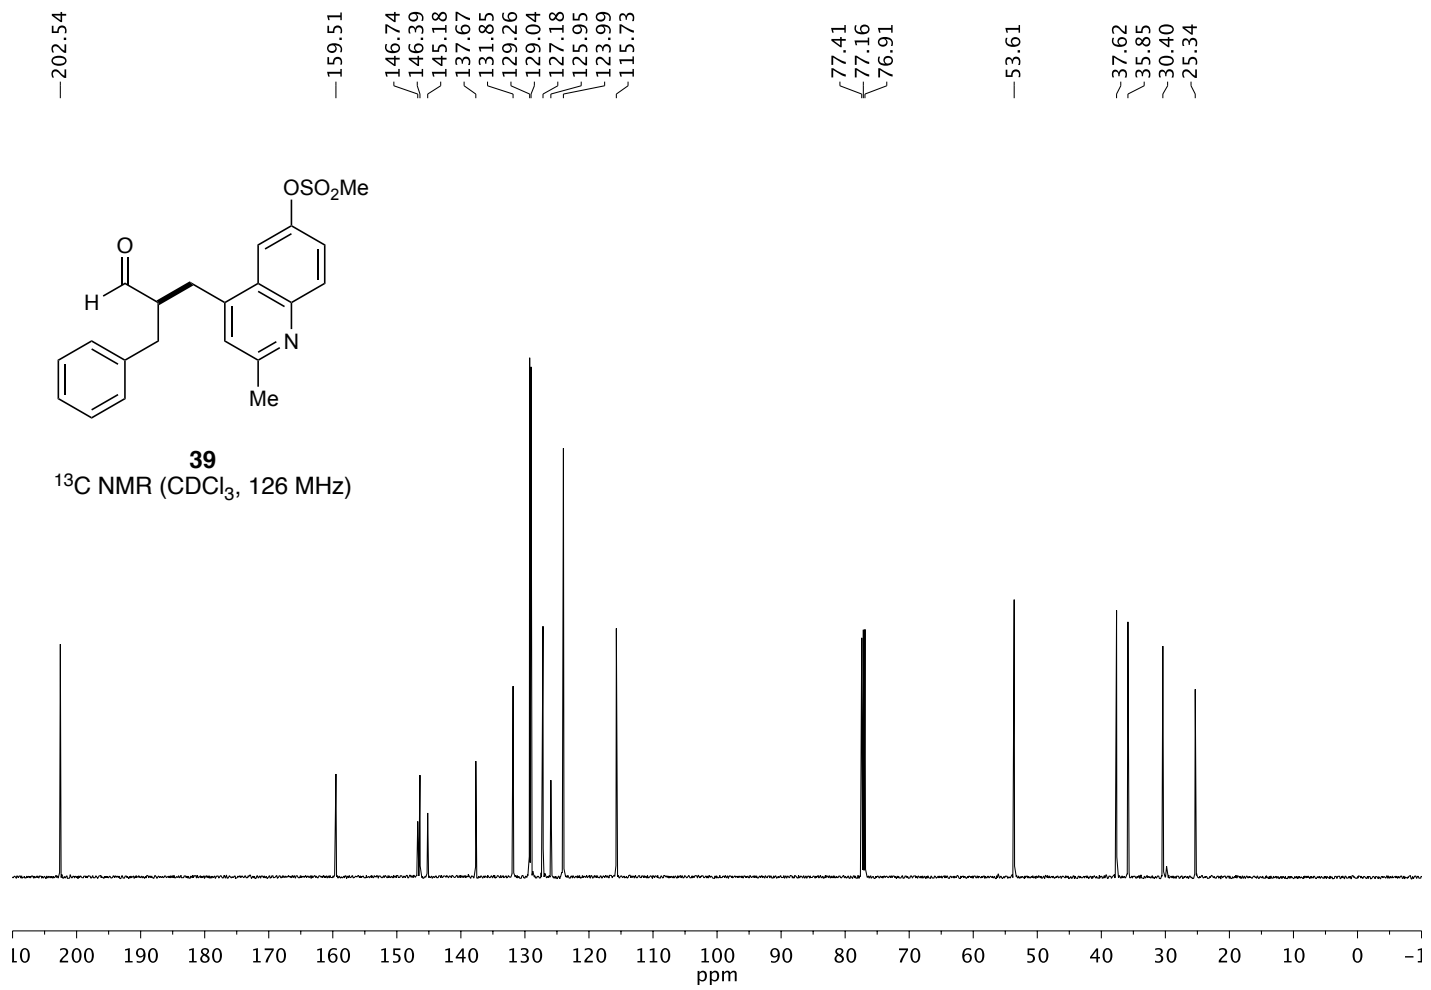

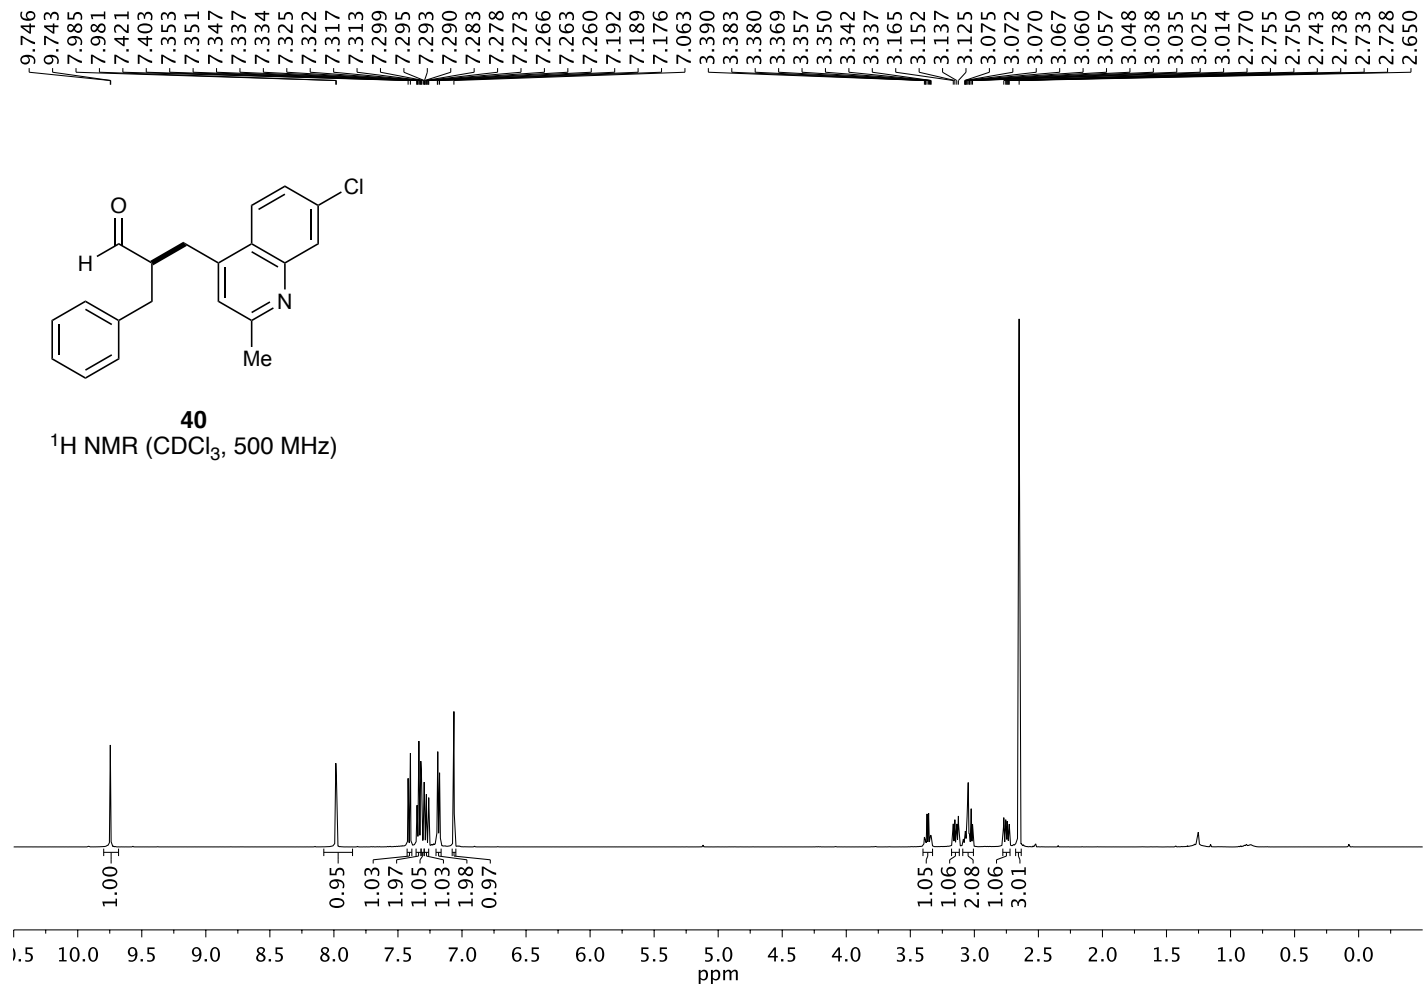

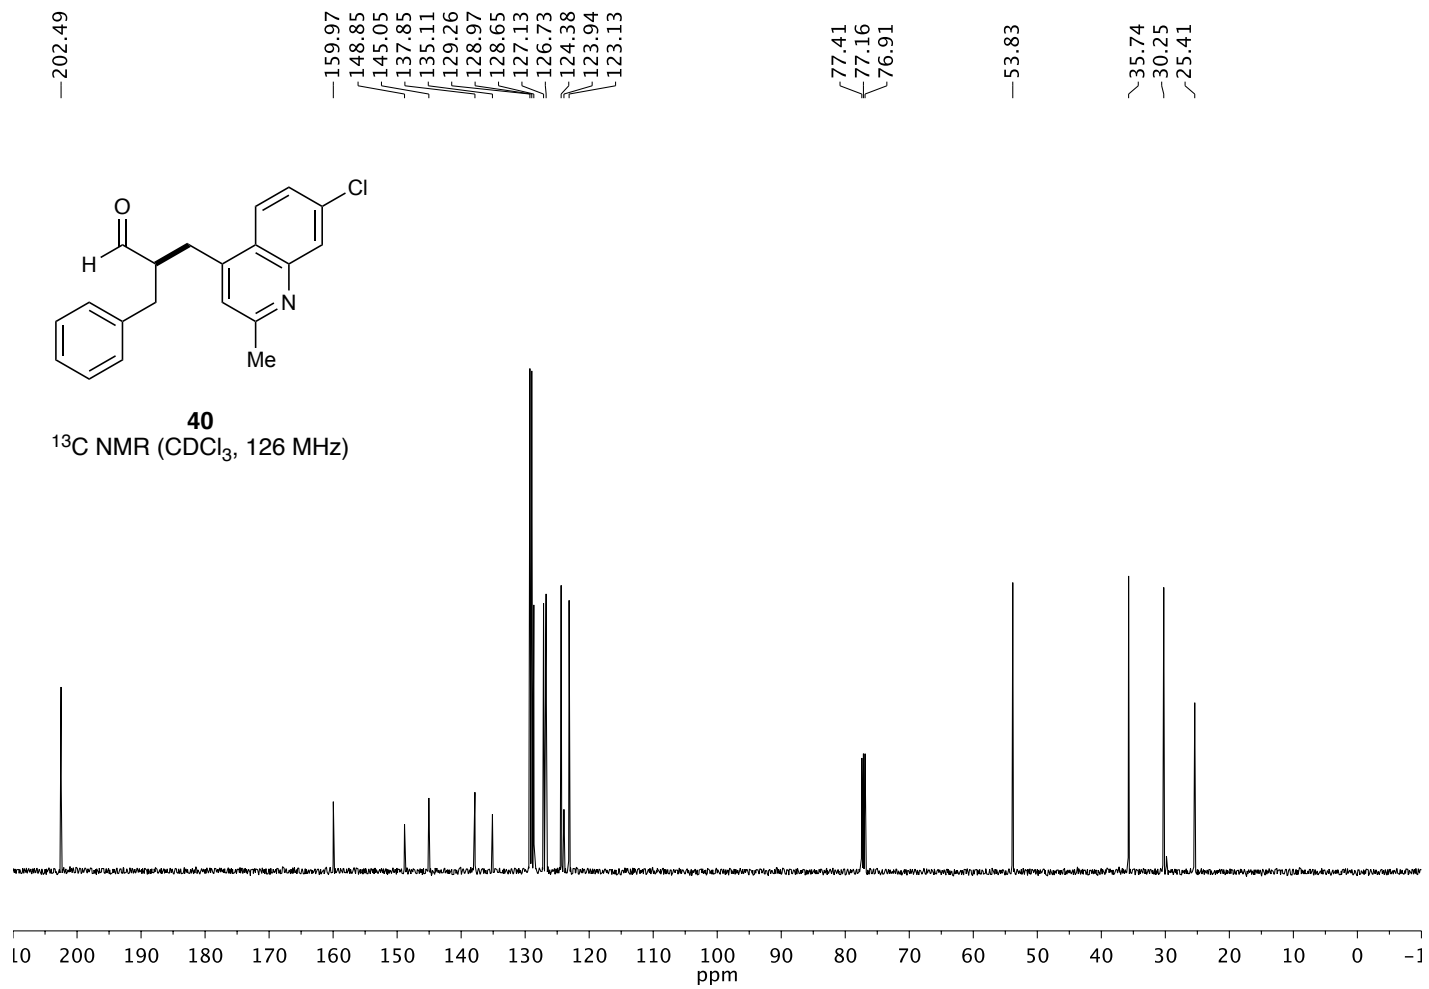

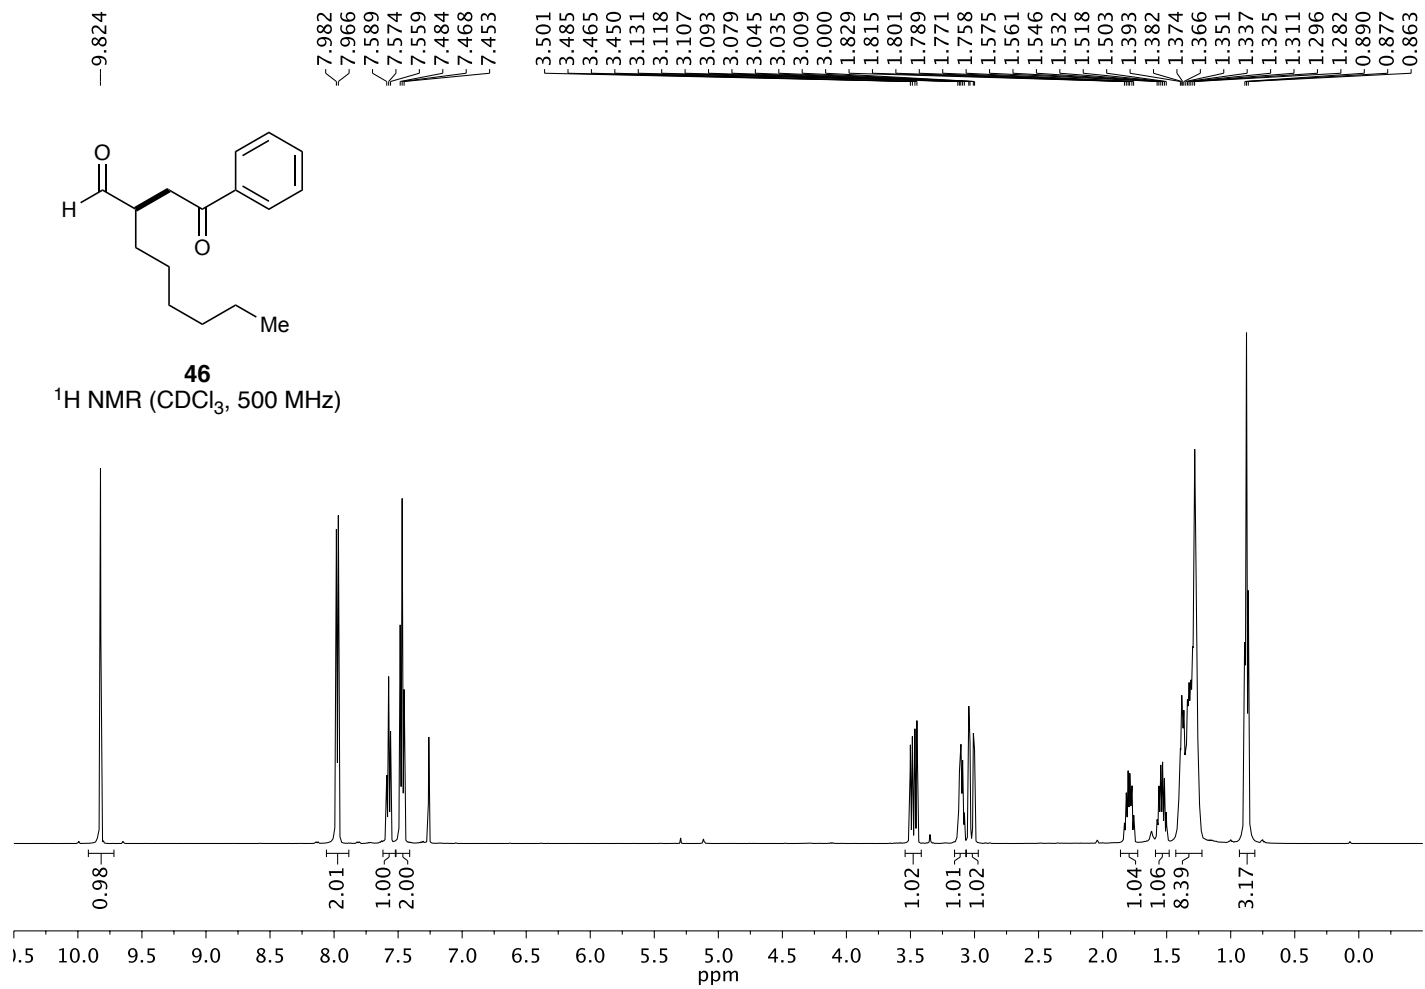



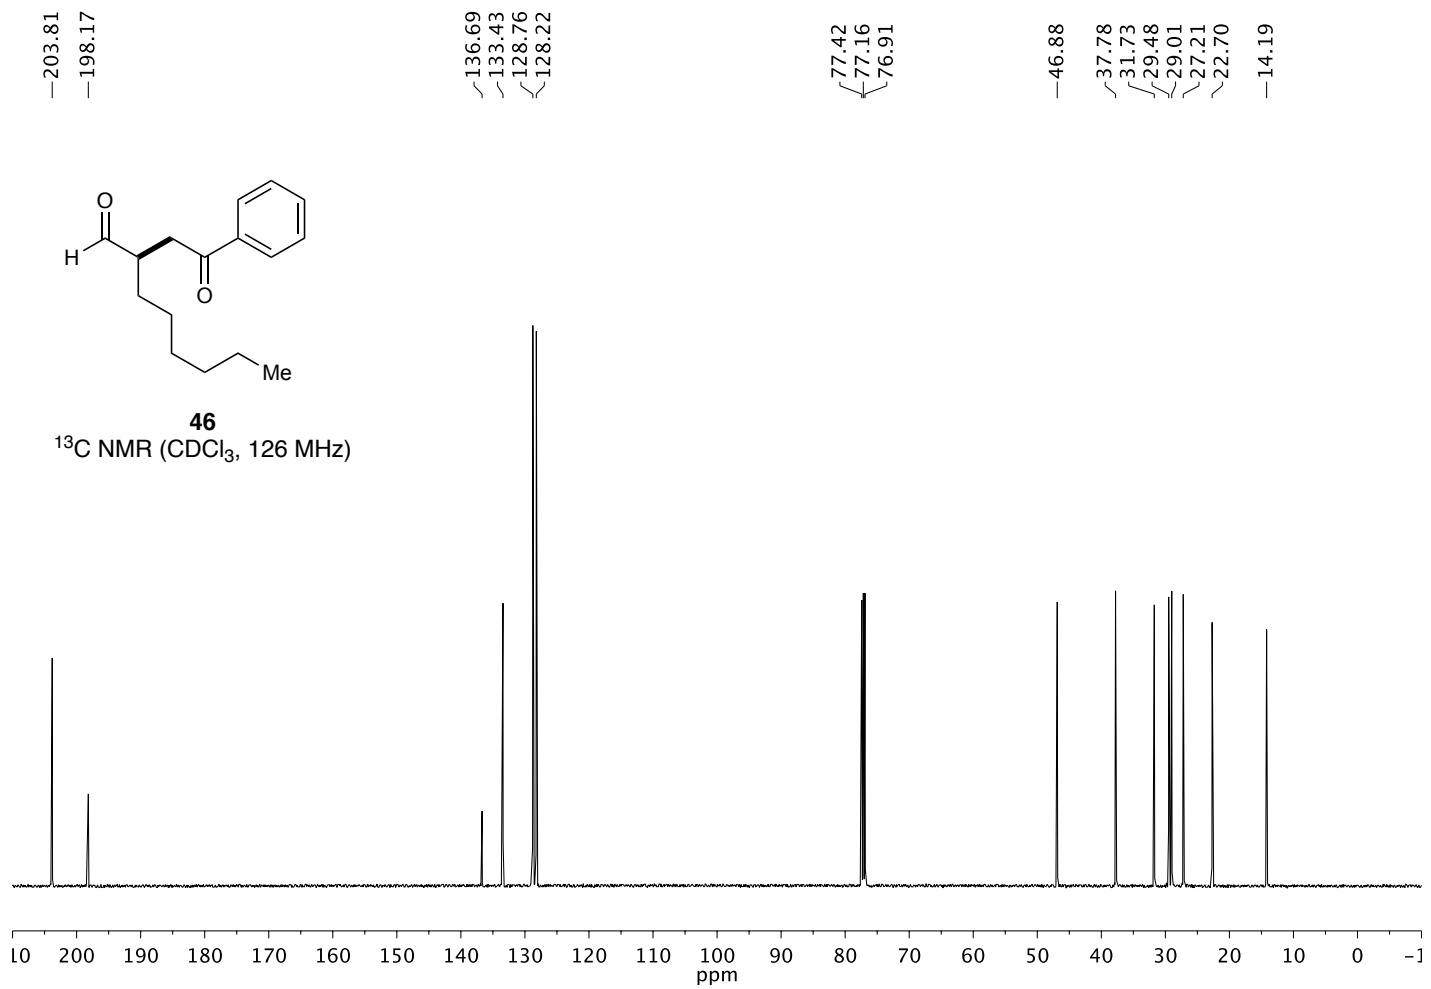

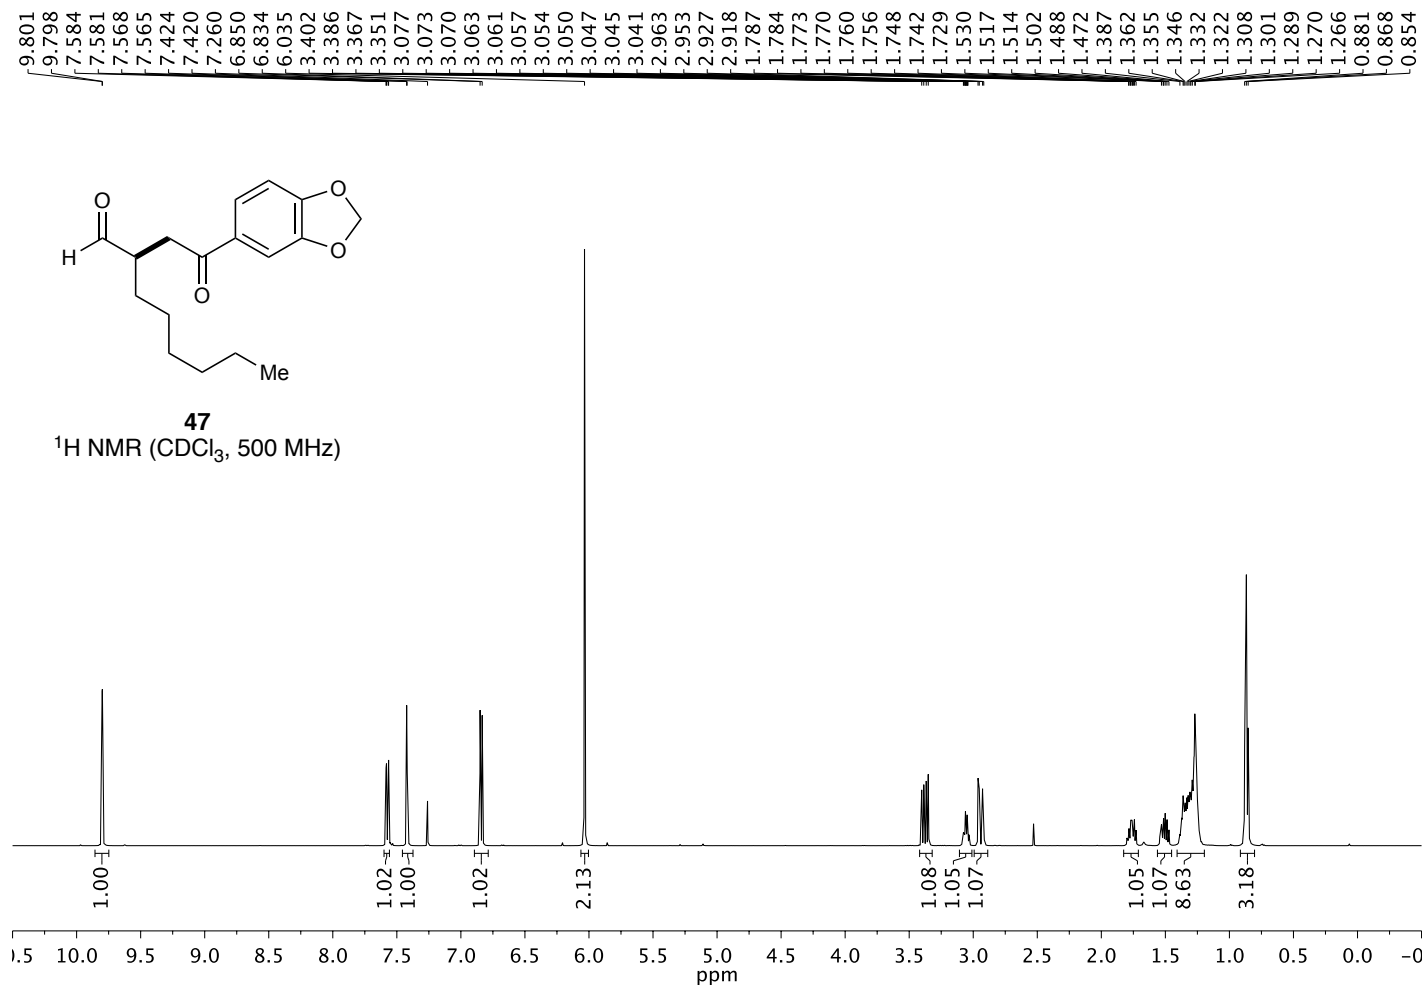

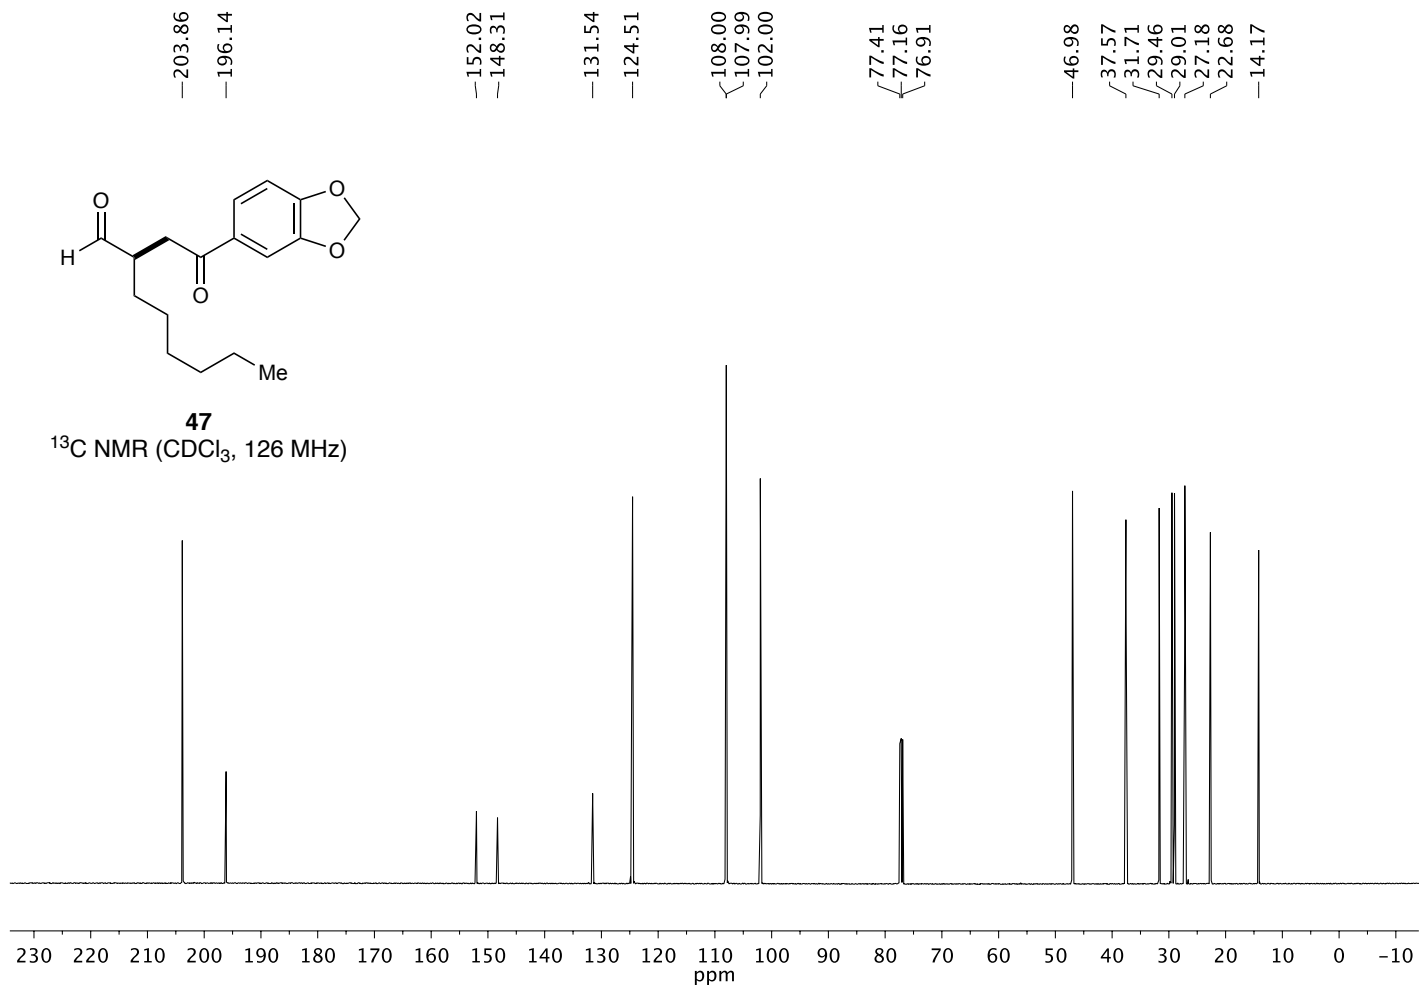

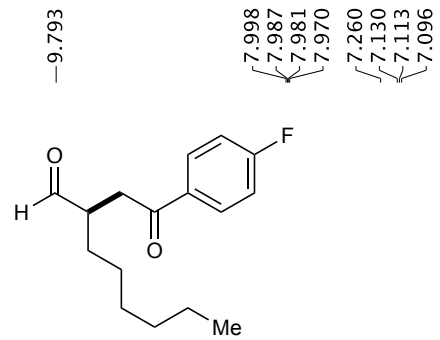

**48**  
<sup>1</sup>H NMR (CDCl<sub>3</sub>, 500 MHz)

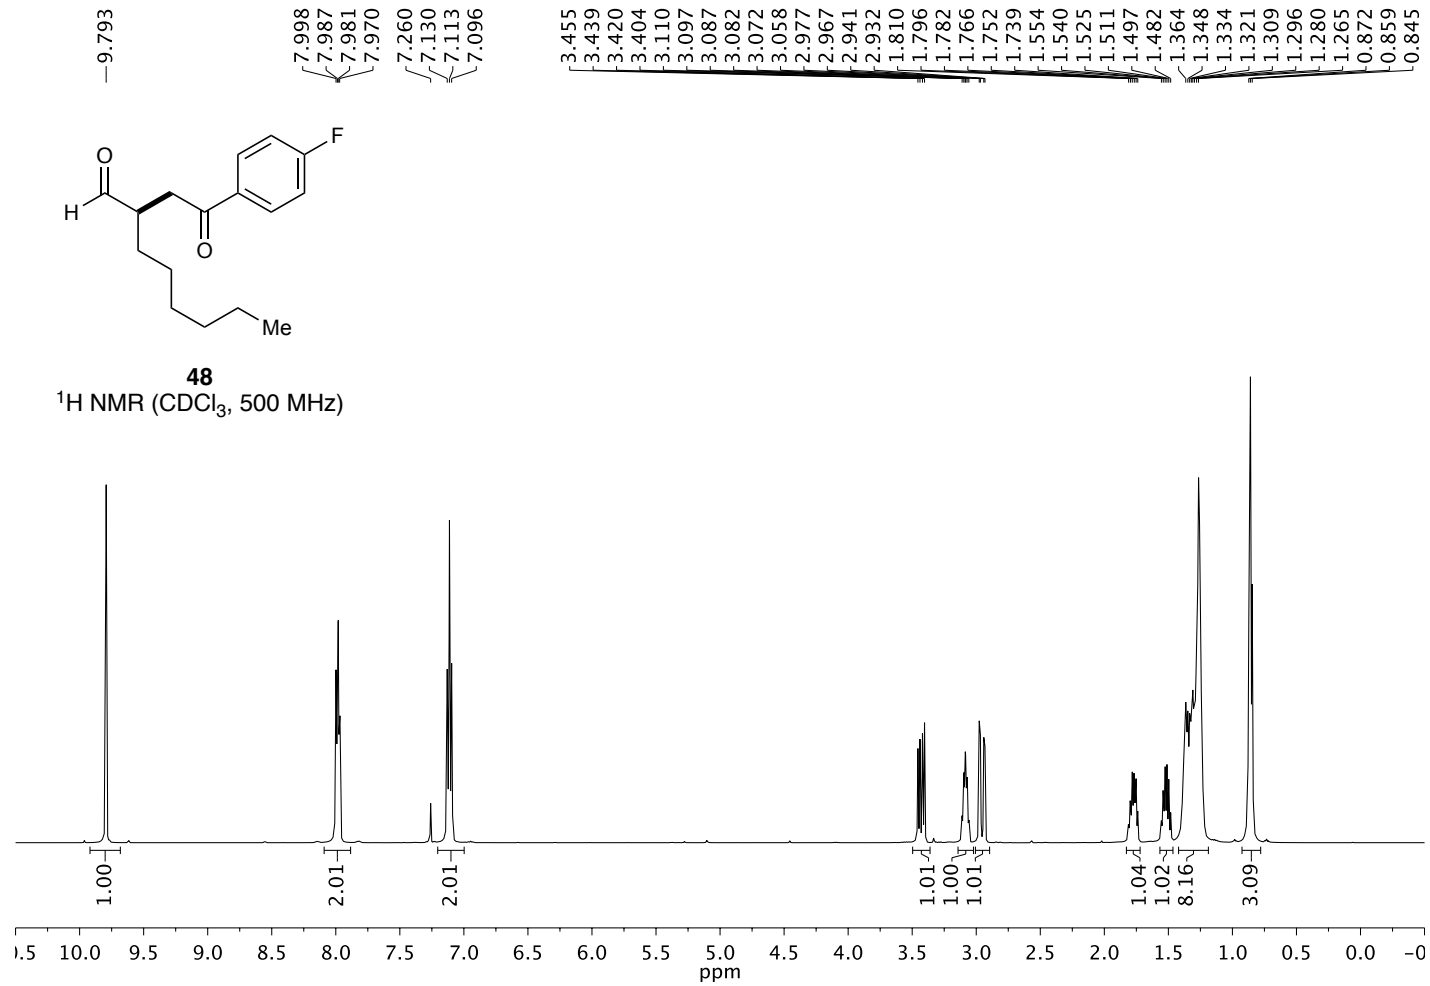

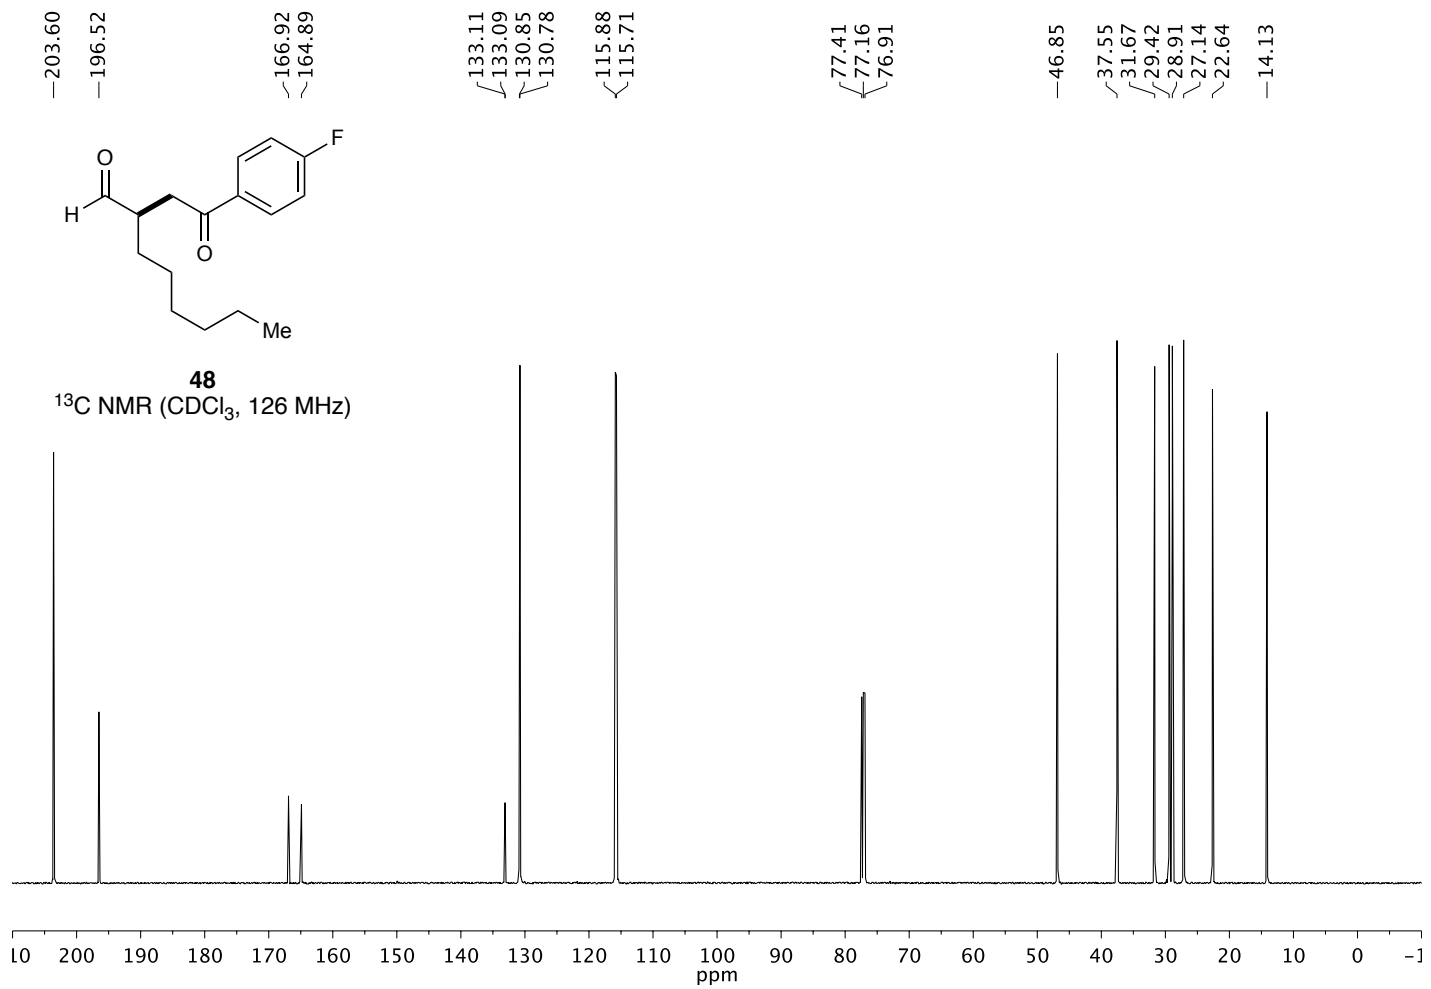

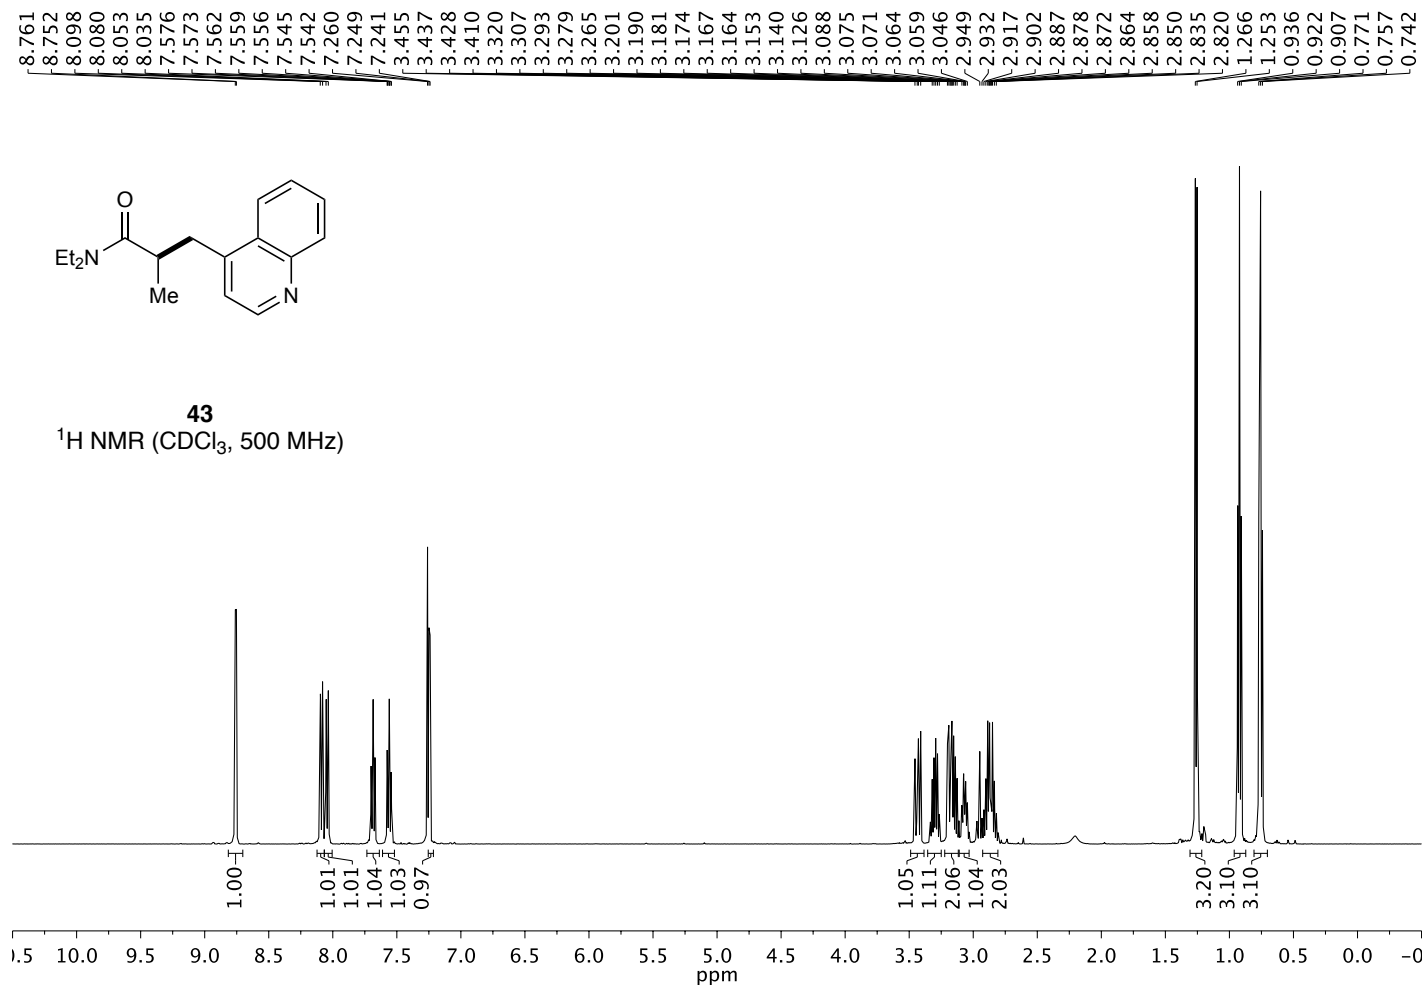

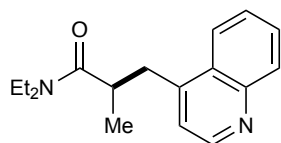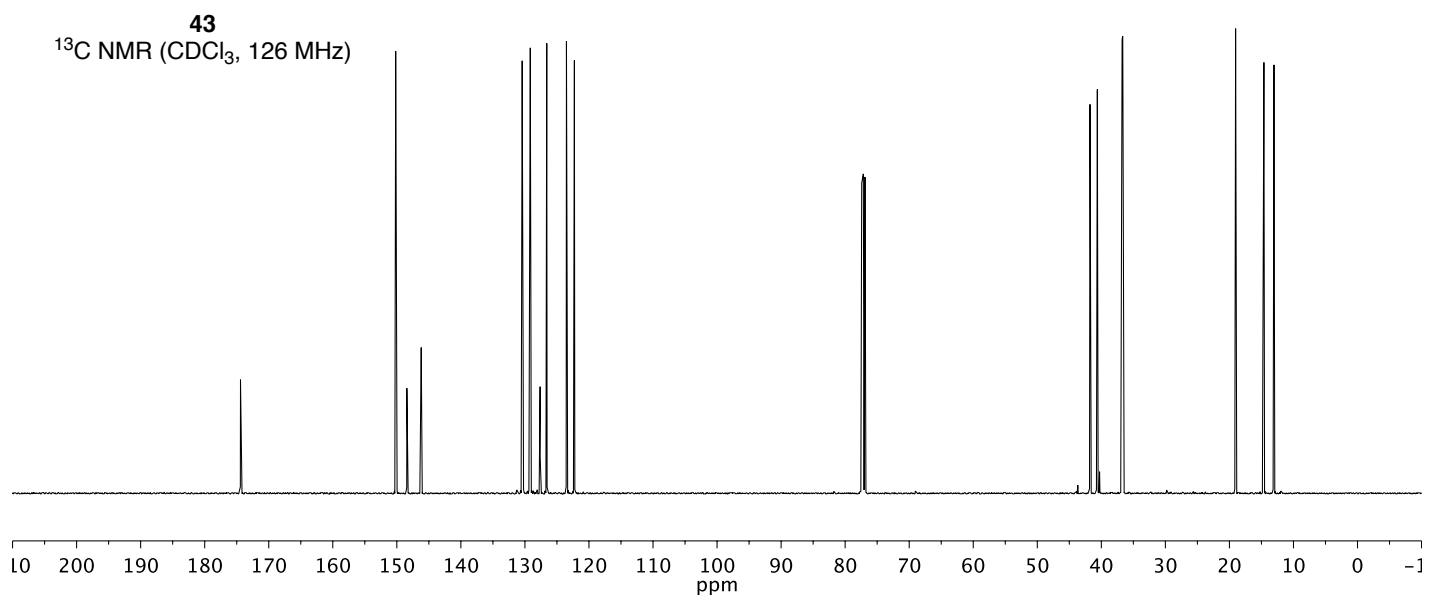

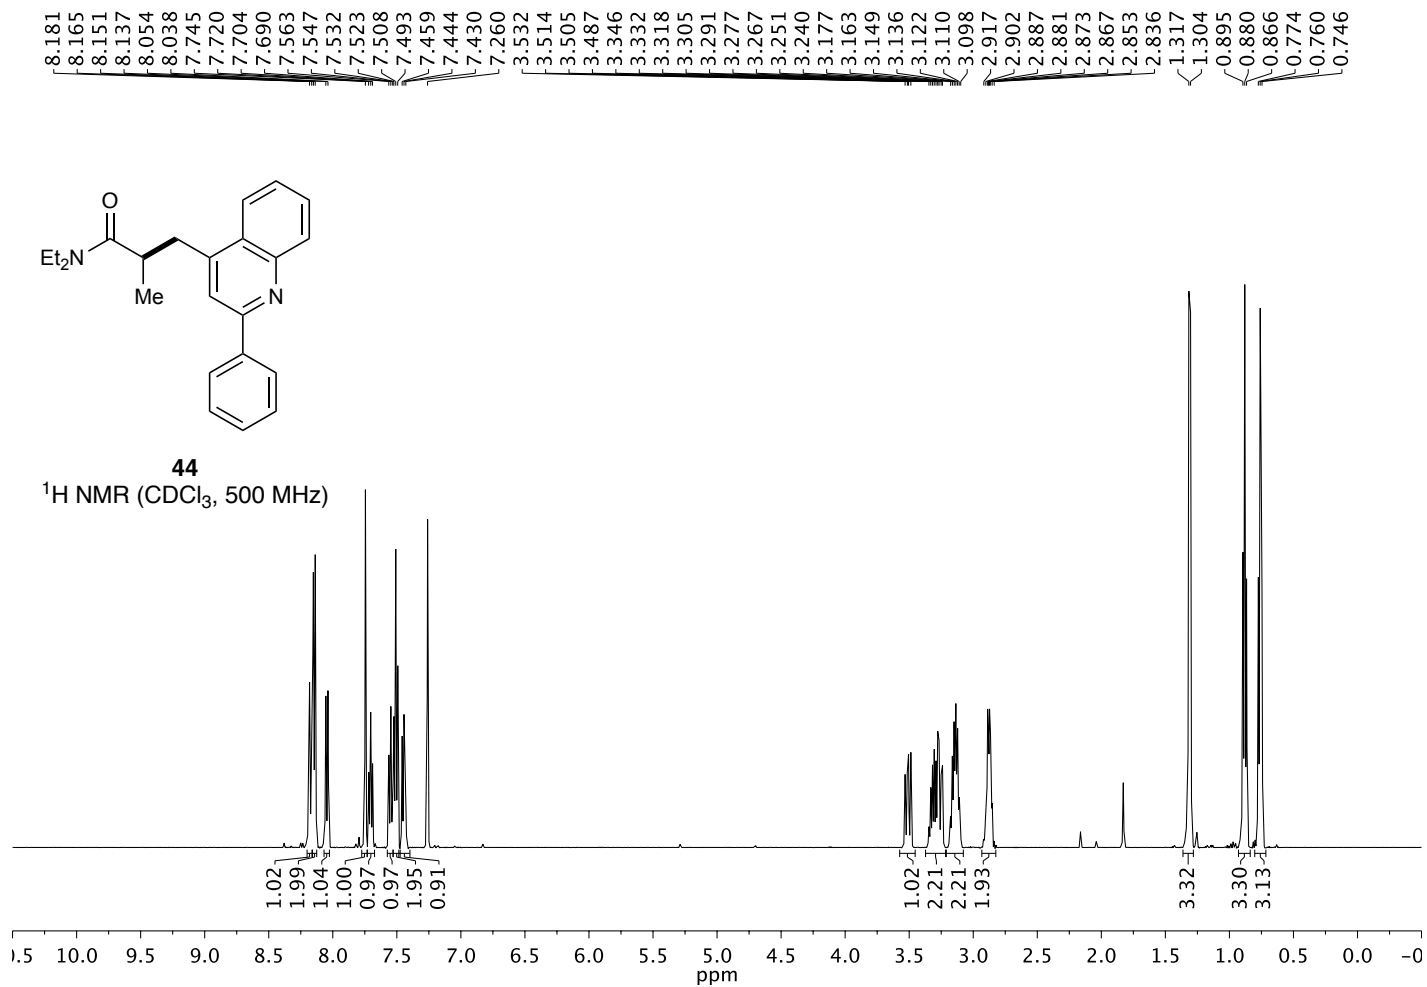



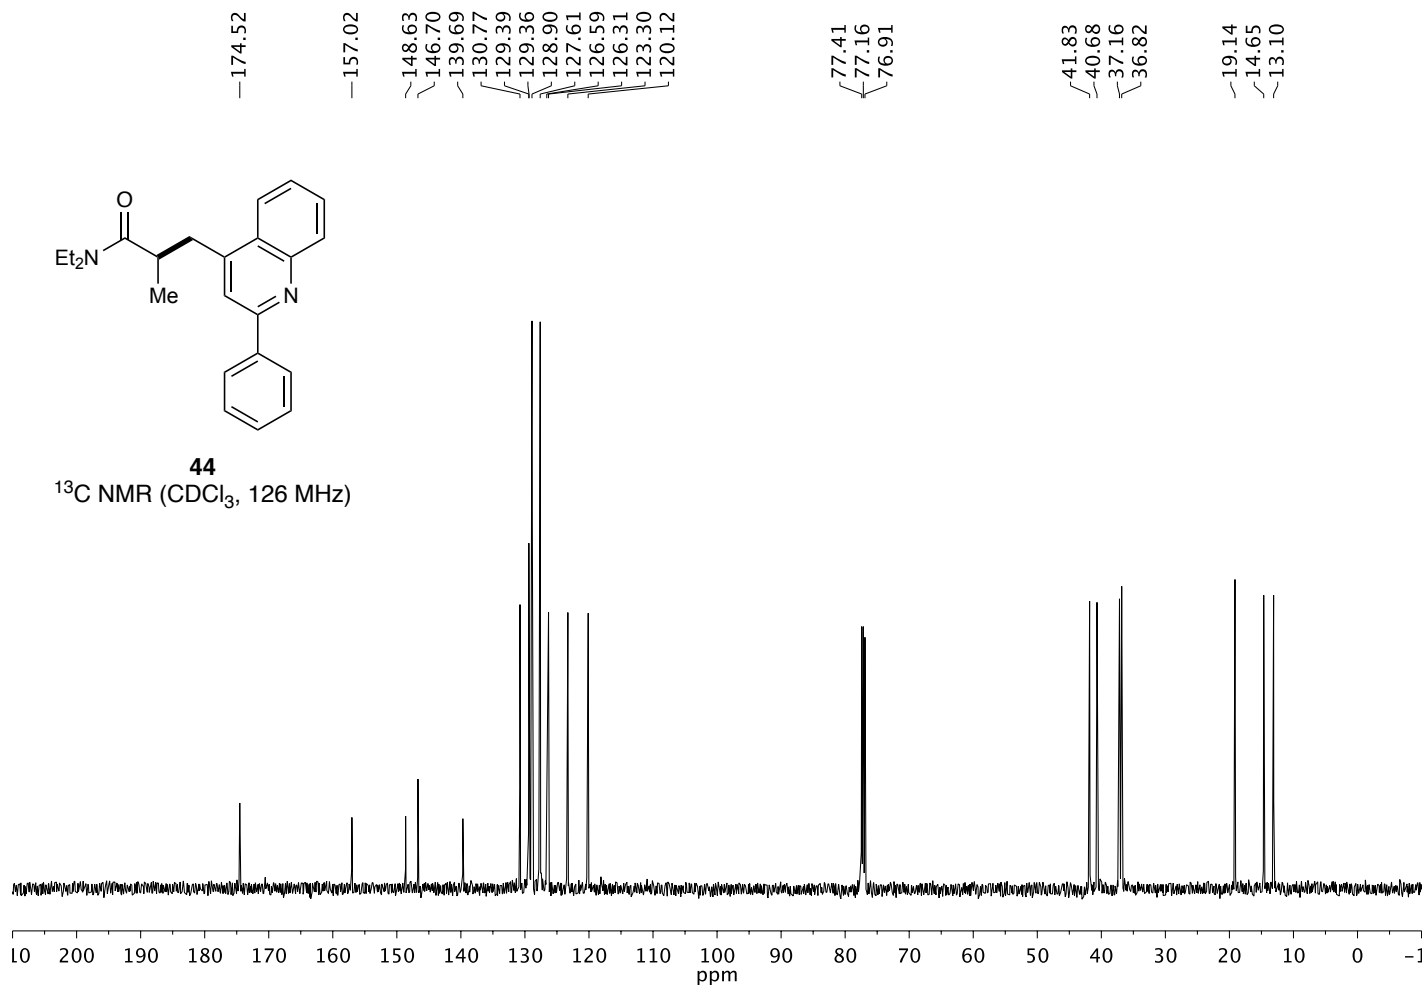

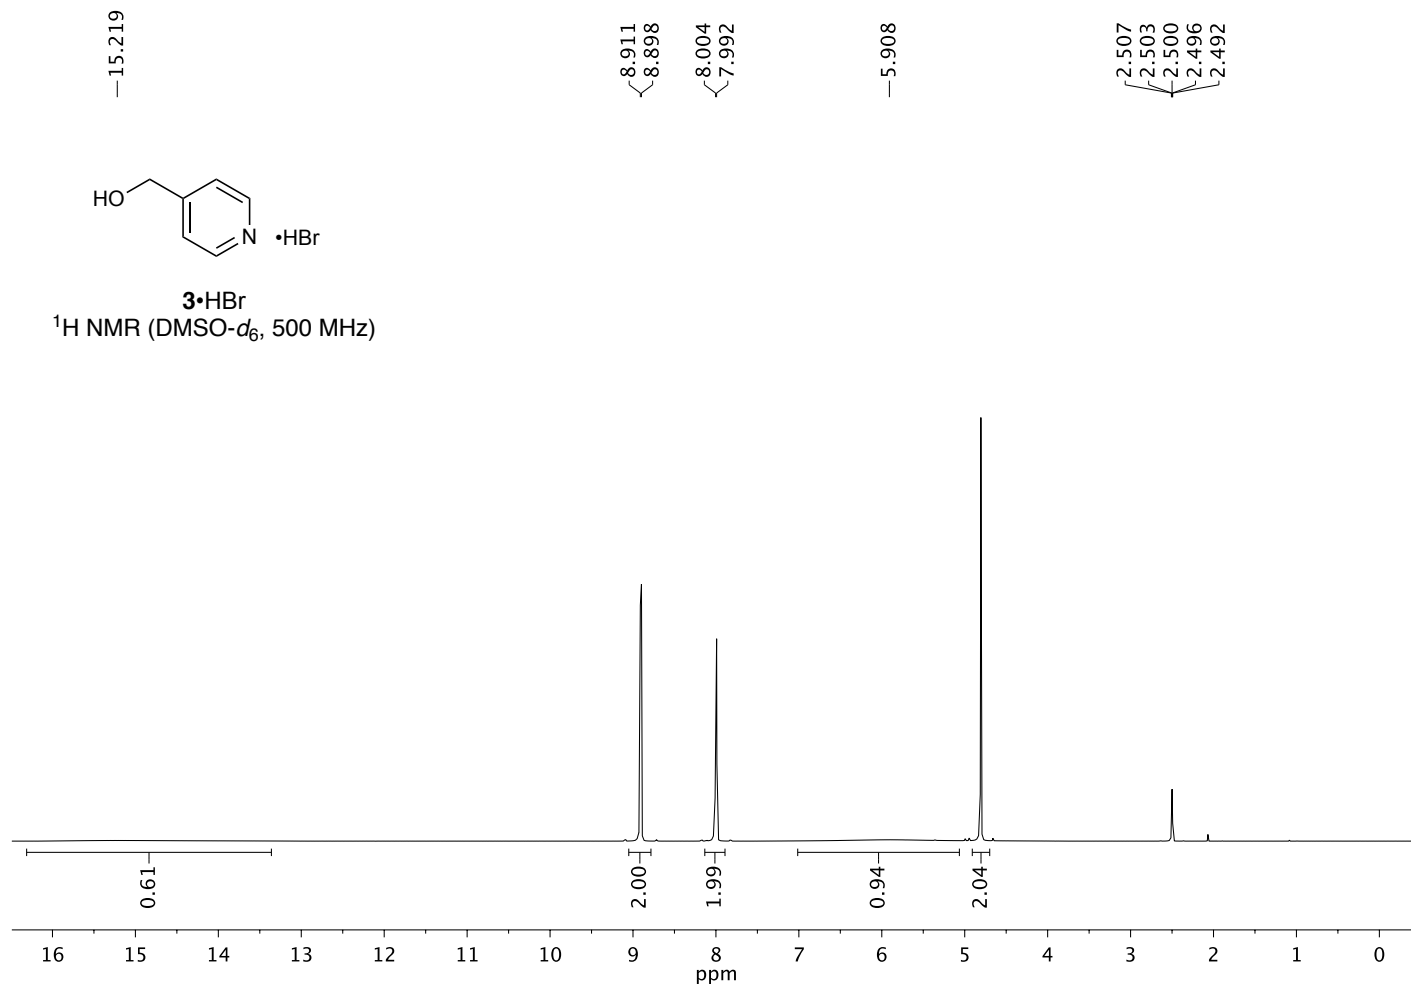

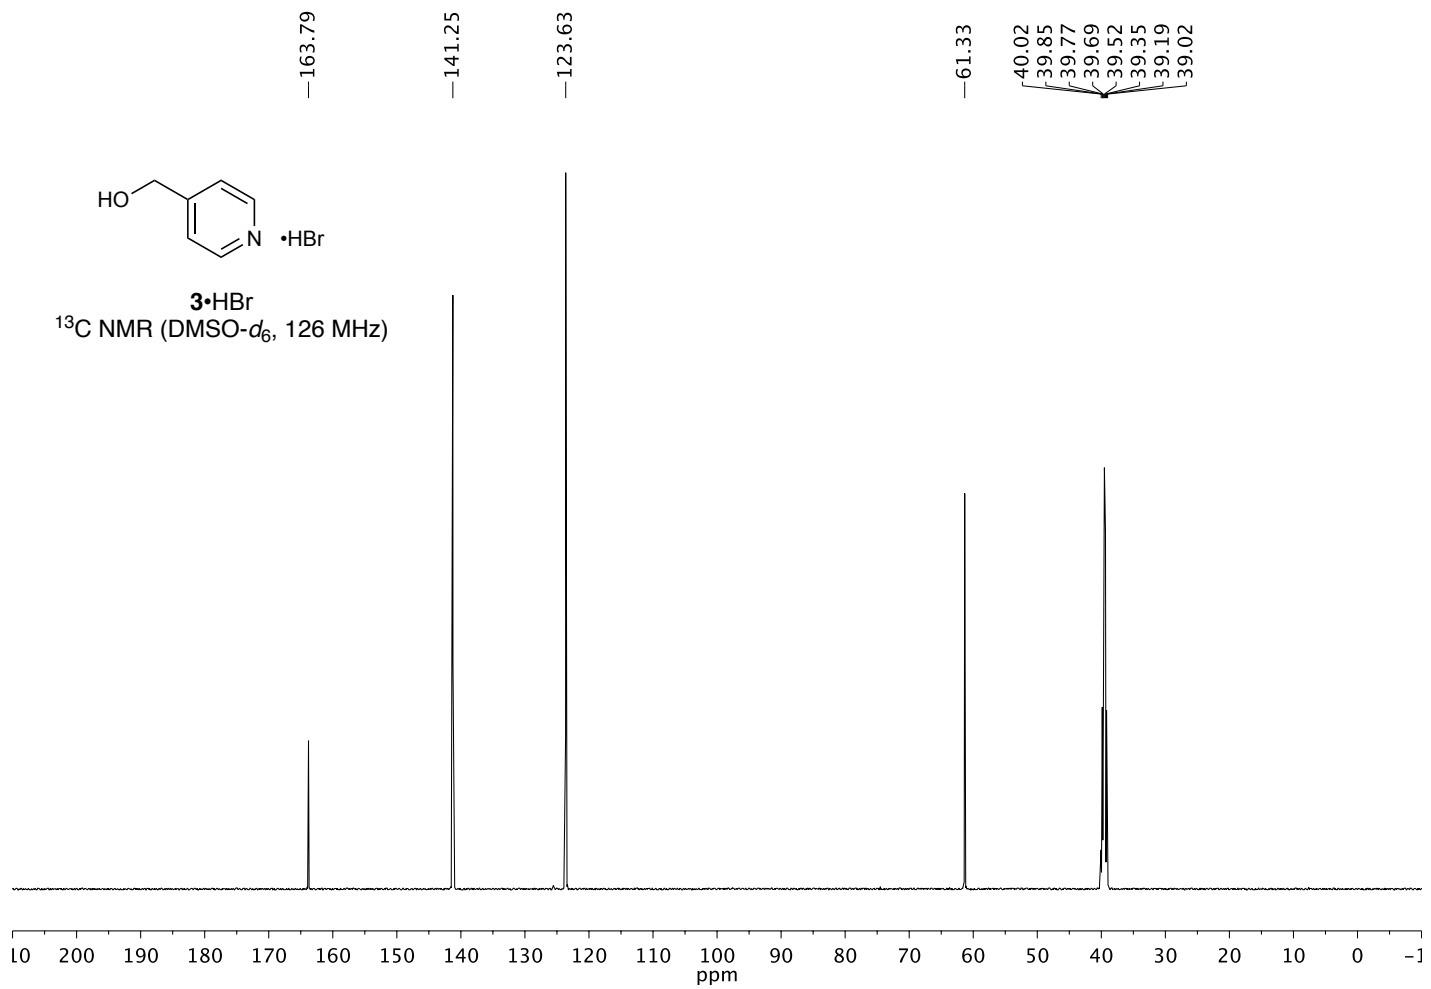

-15.485

{ 8.758  
8.746

{ 7.856  
7.798  
7.786

-5.821

-4.748

{ 2.723  
2.508  
2.504  
2.500  
2.497  
2.493

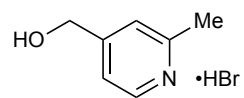

<sup>1</sup>H NMR (DMSO-*d*<sub>6</sub>, 500 MHz)

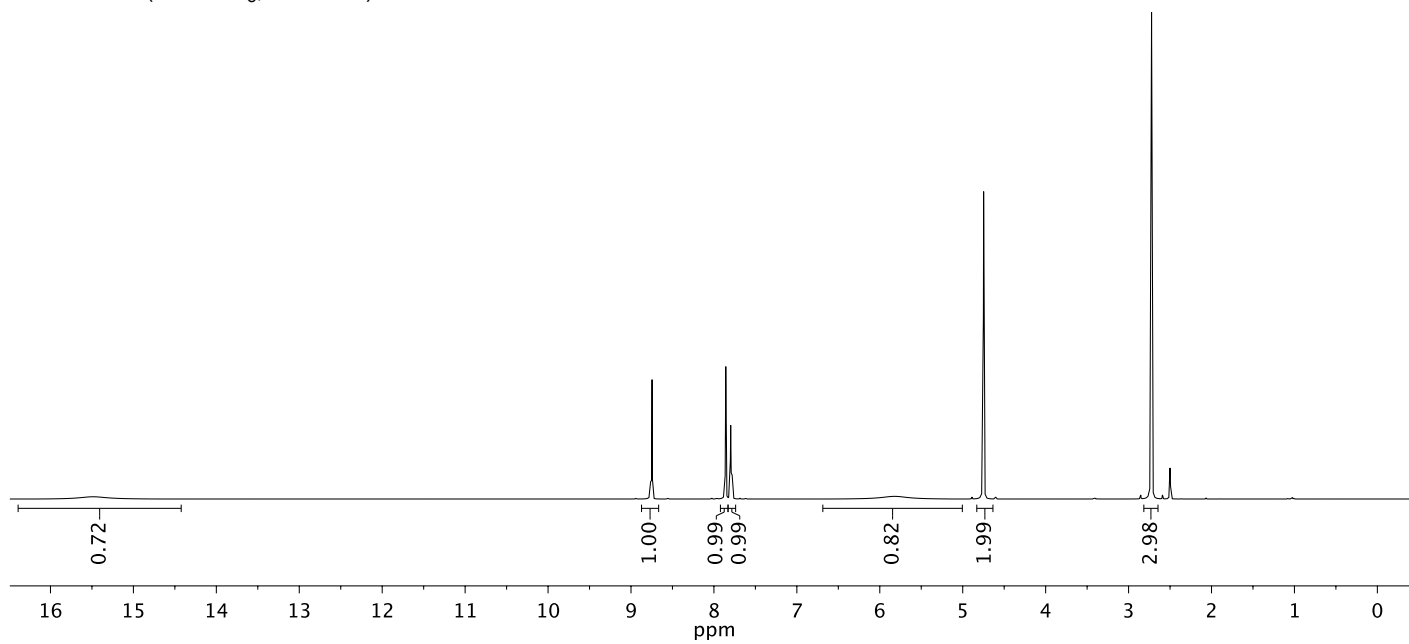

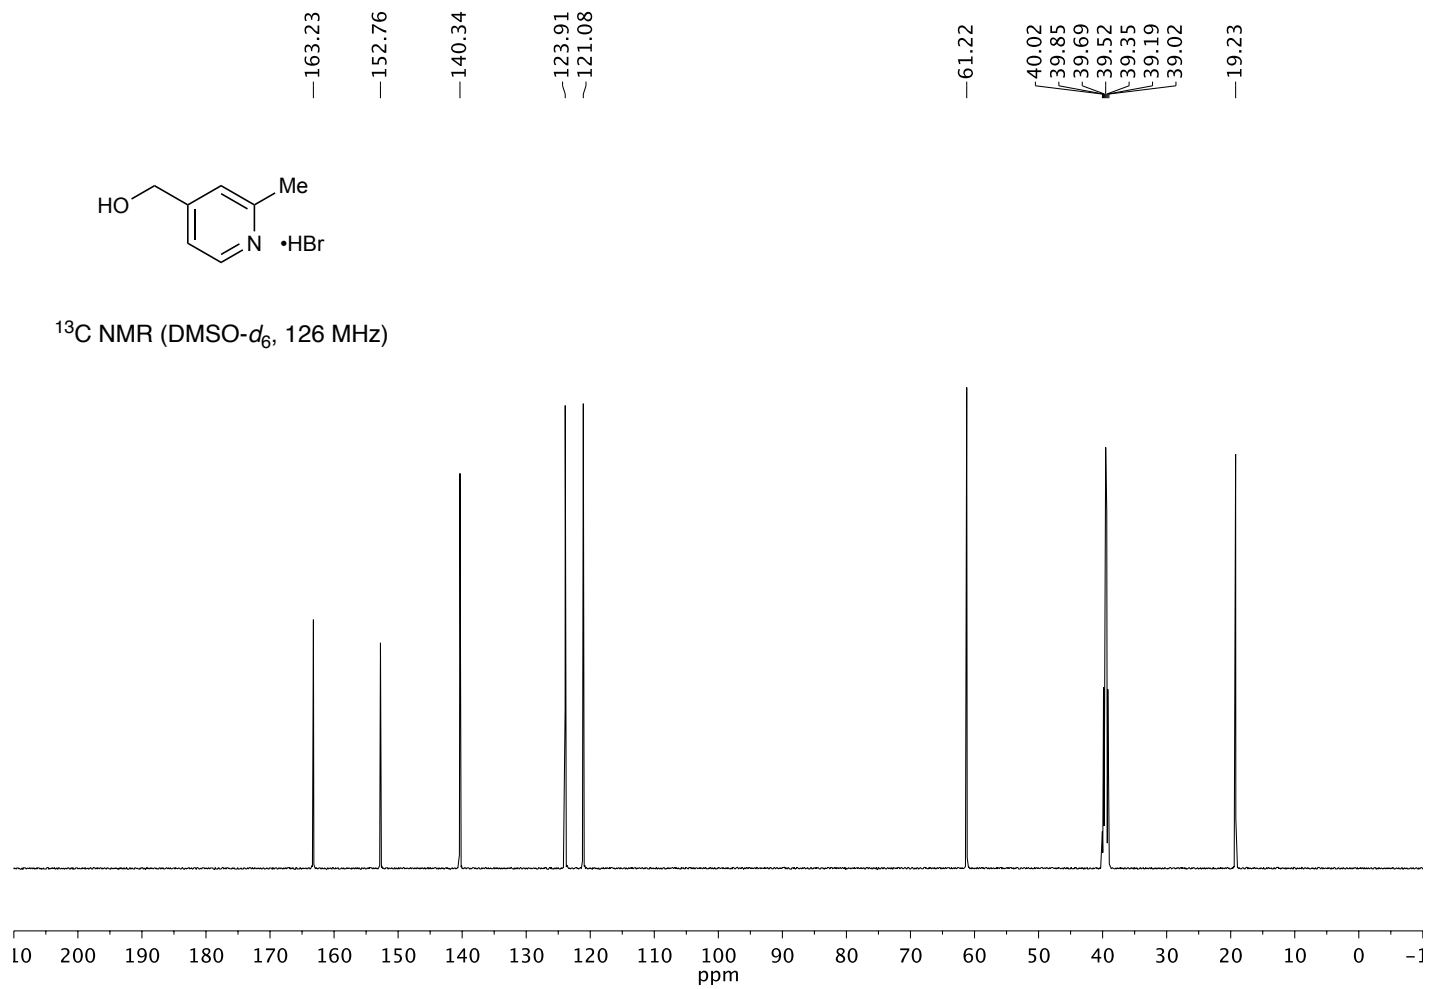

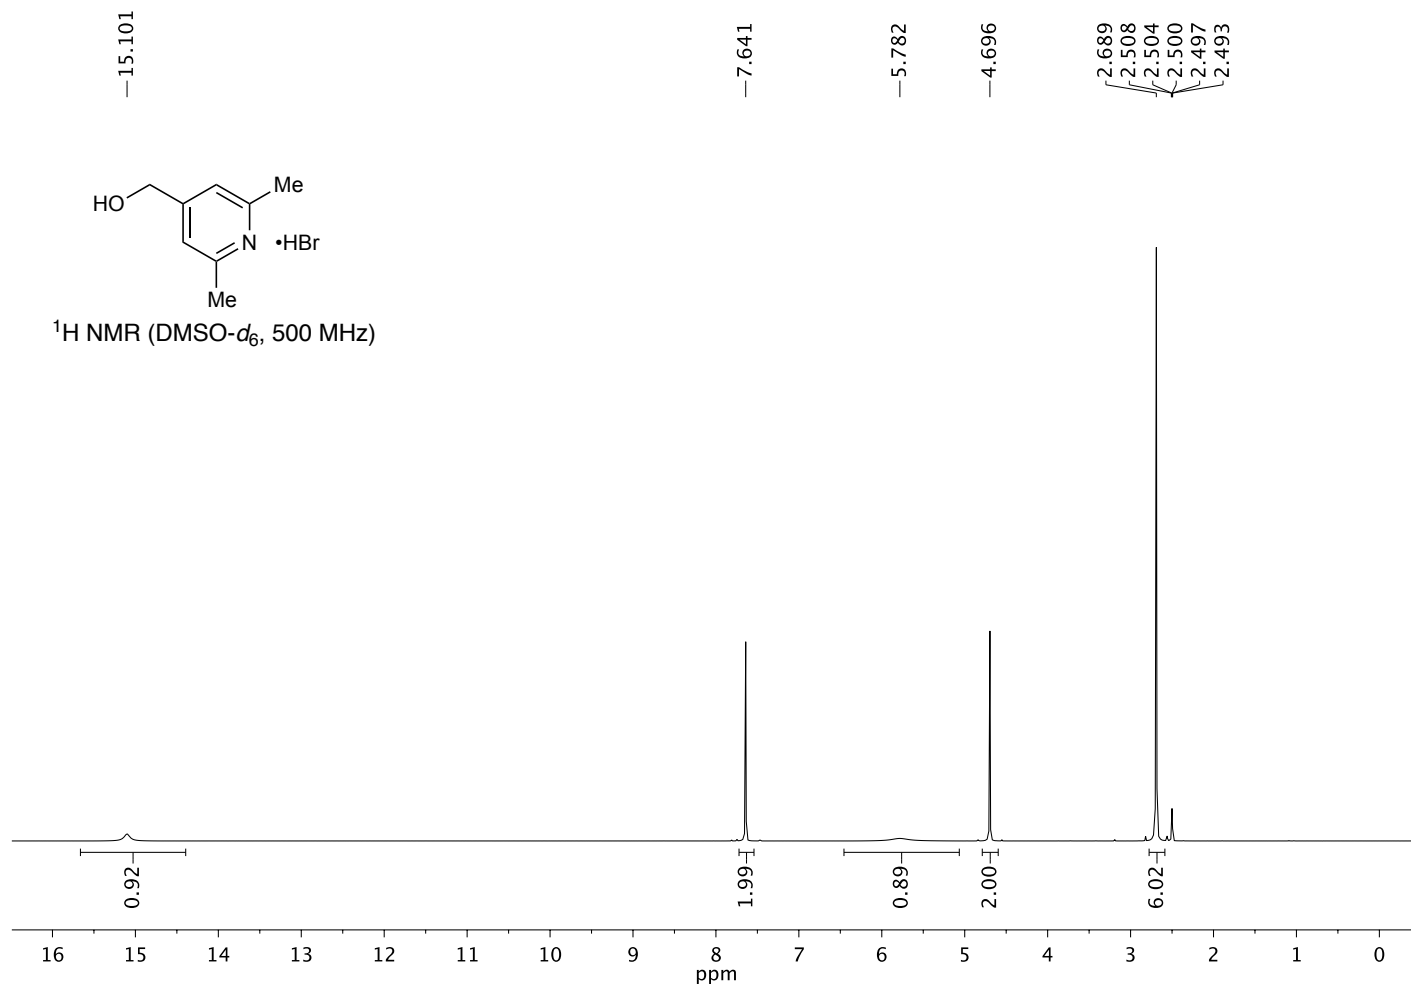

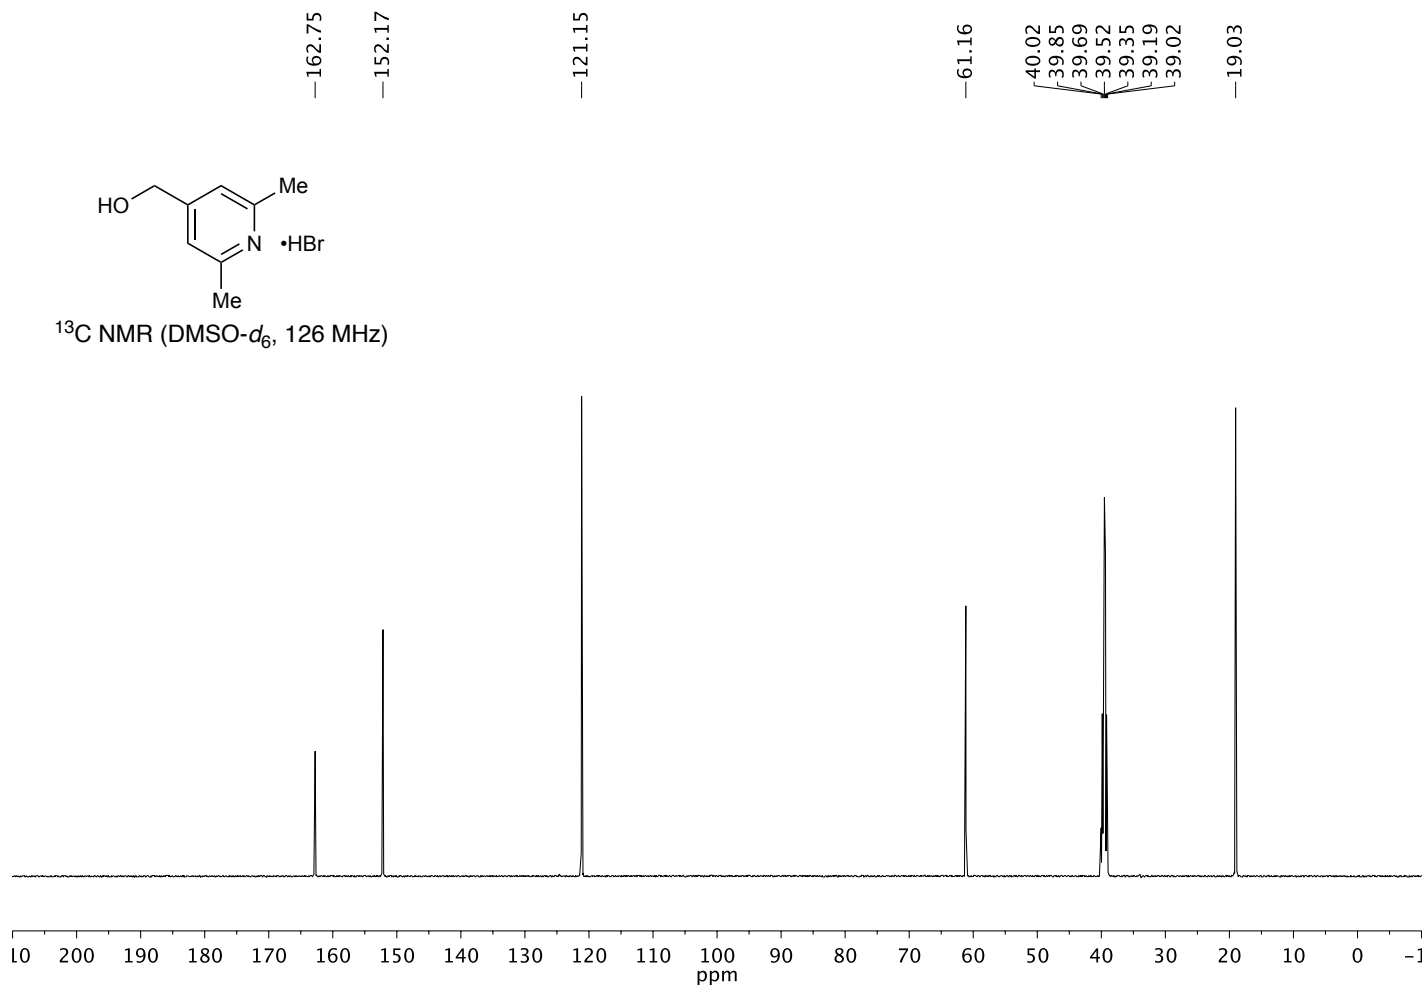

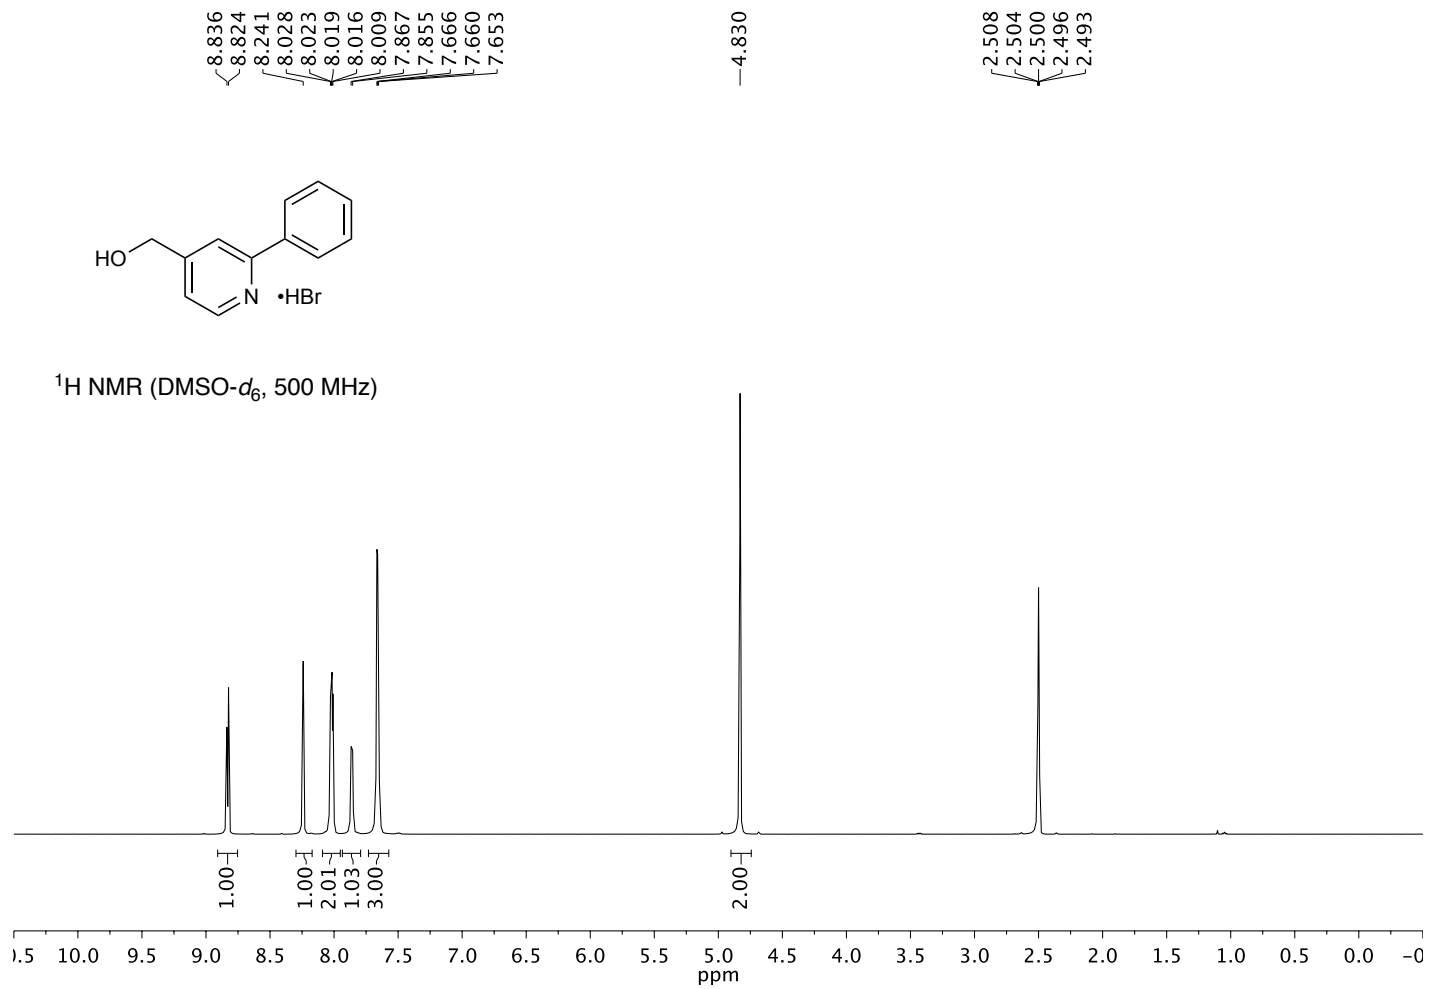



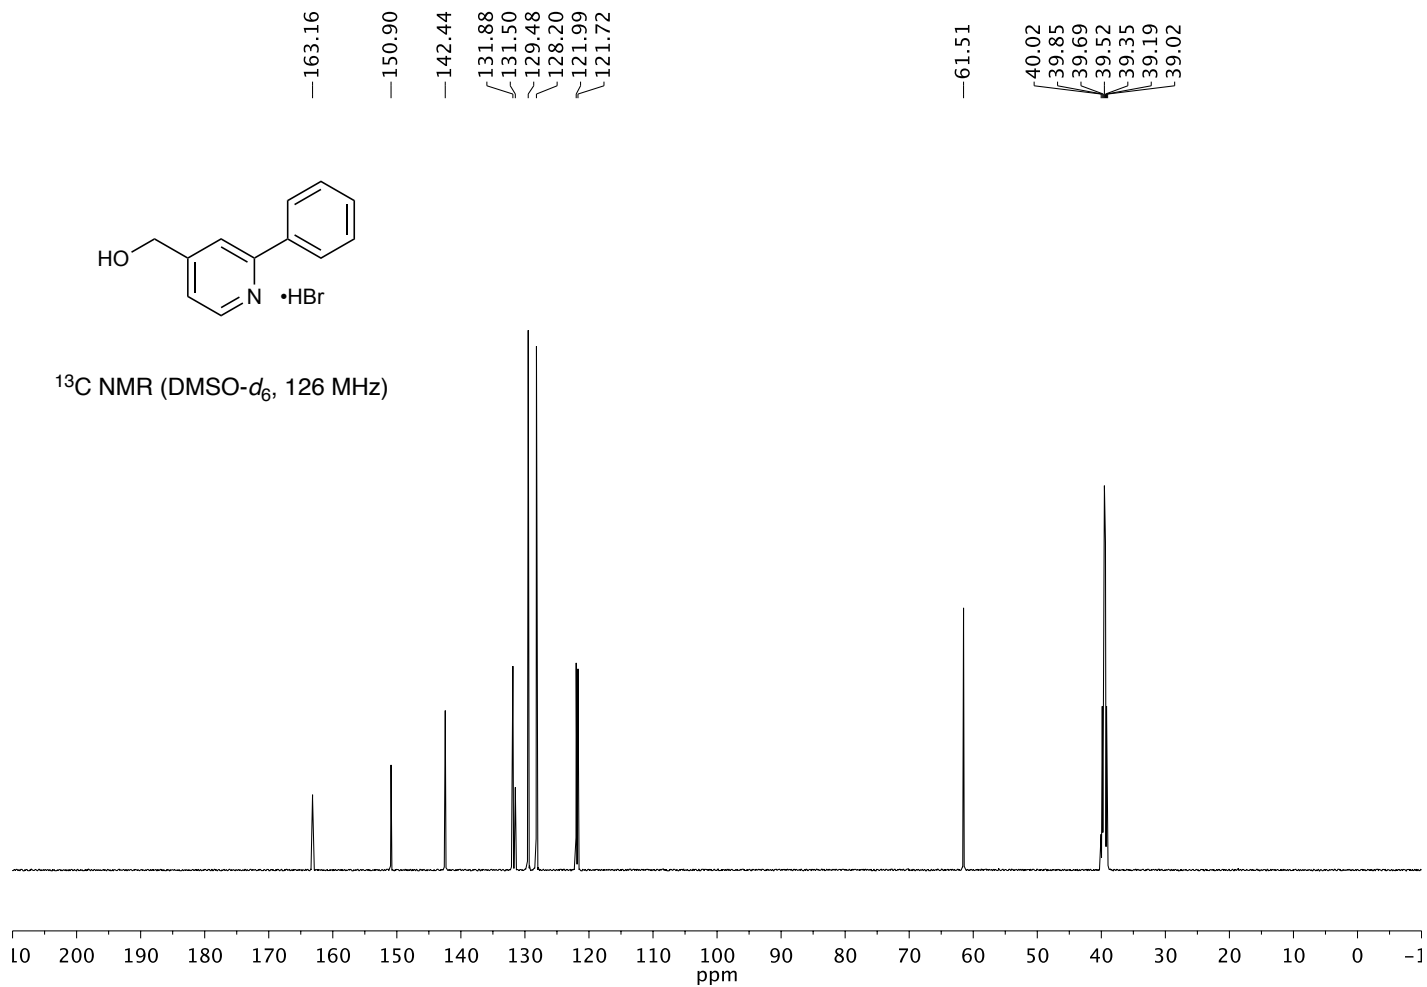

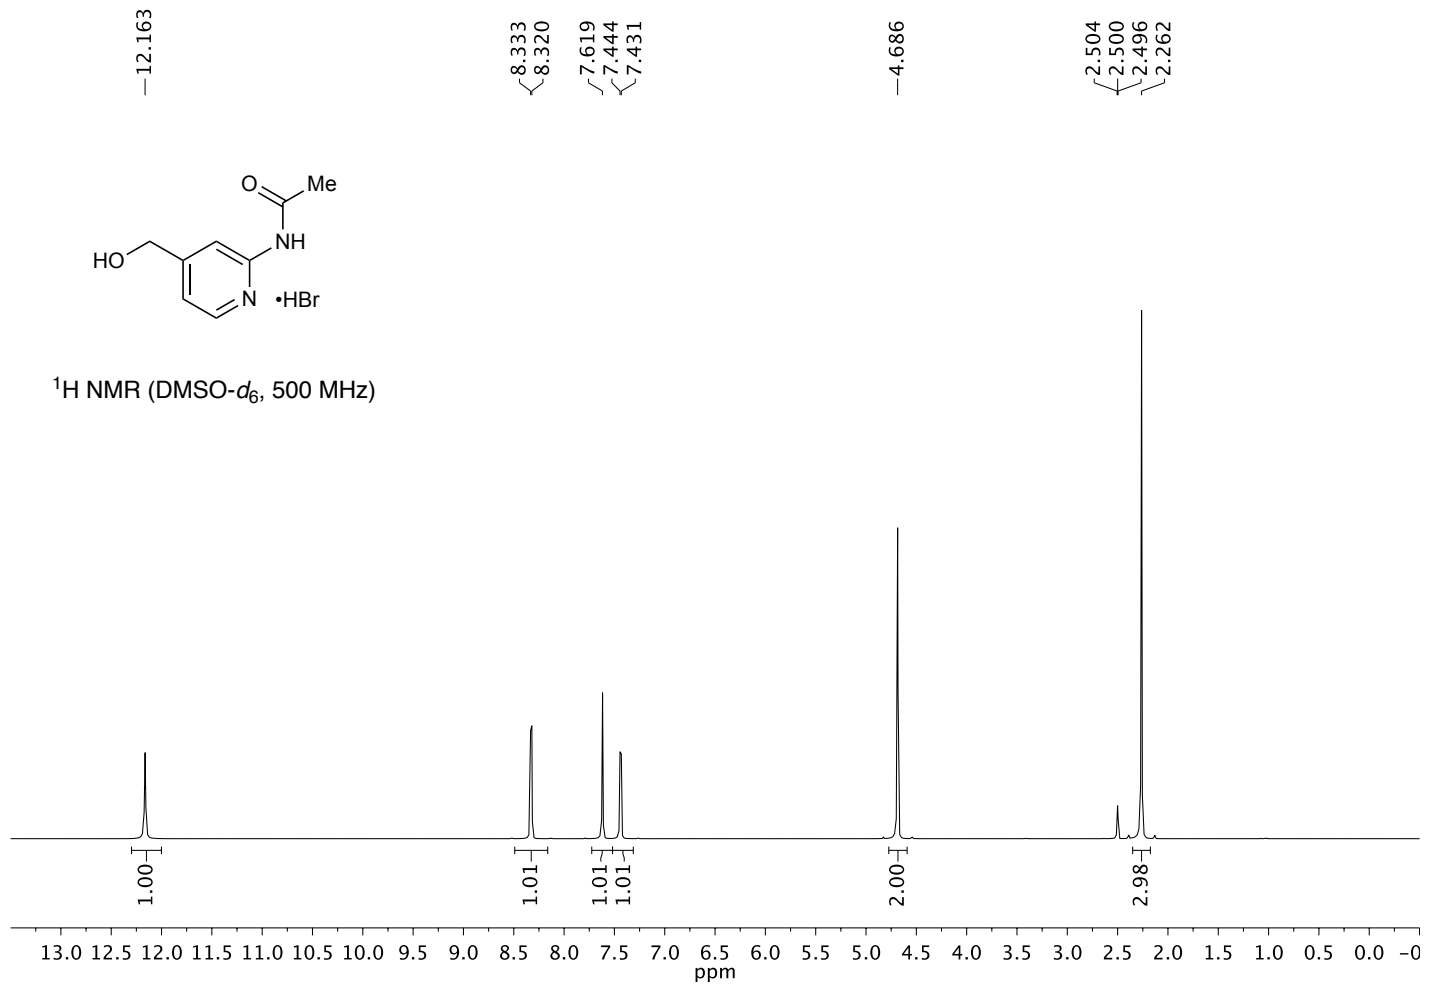

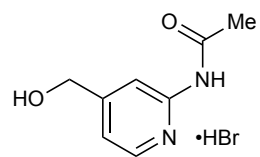

<sup>13</sup>C NMR (DMSO-*d*<sub>6</sub>, 126 MHz)

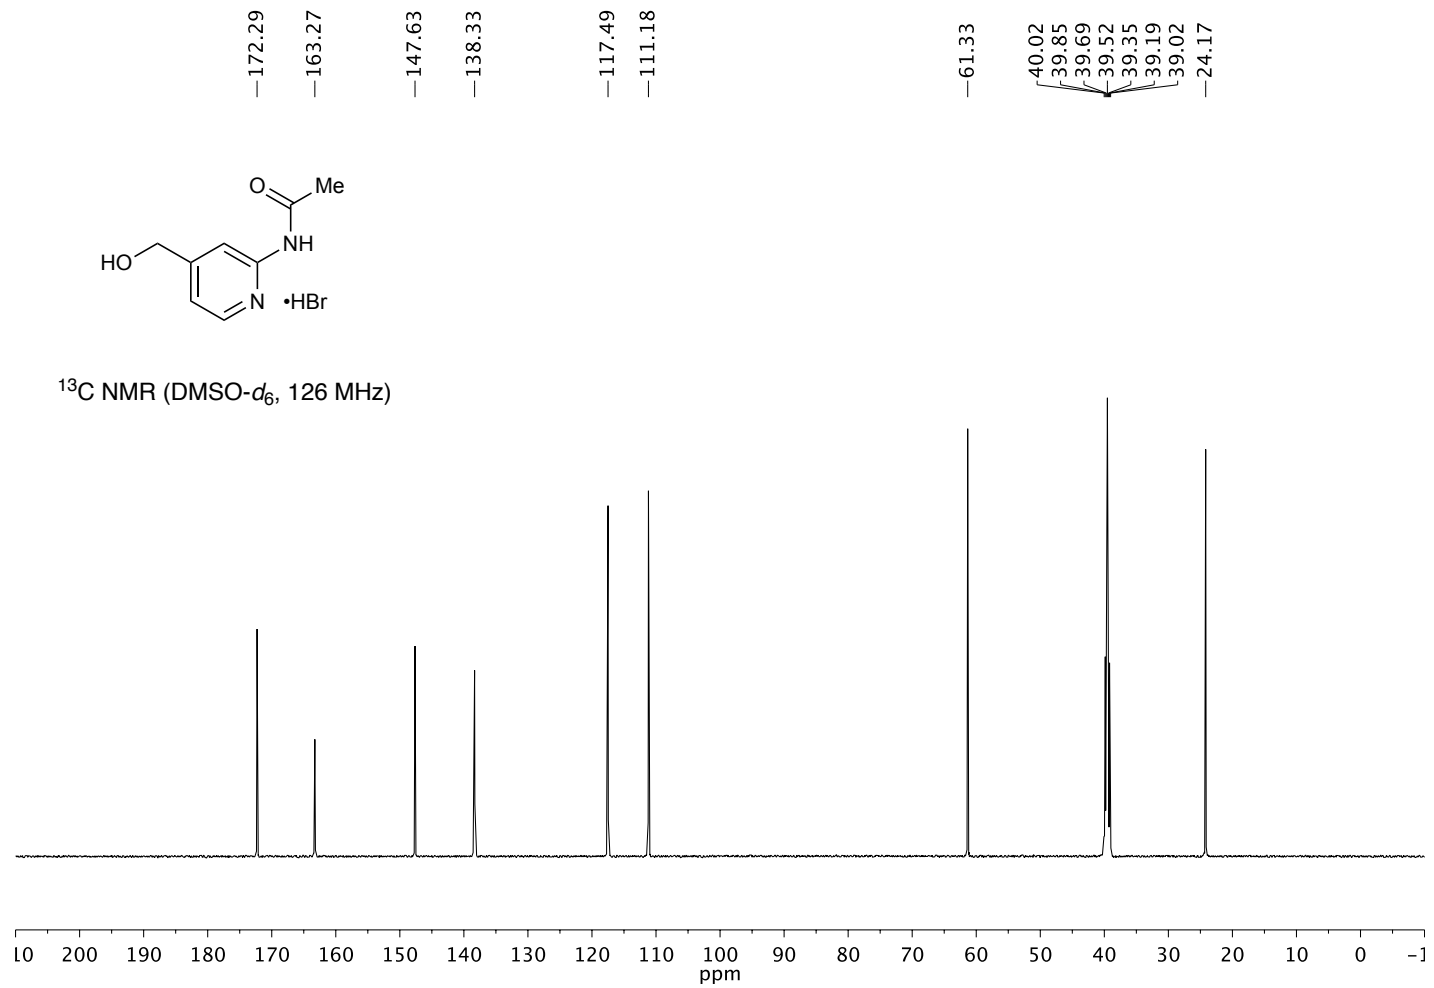

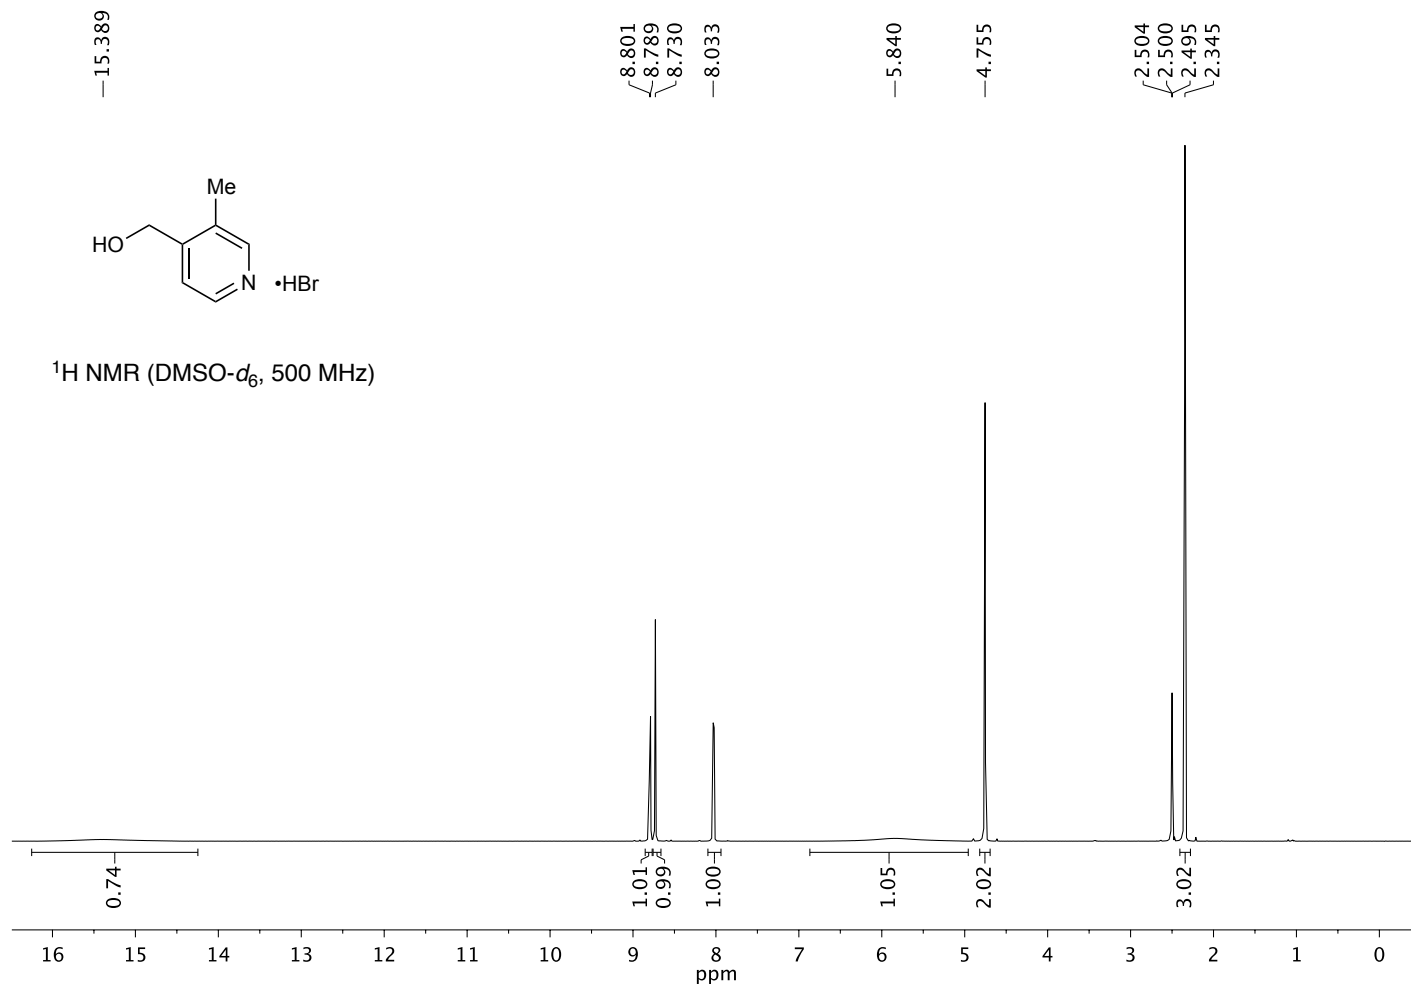

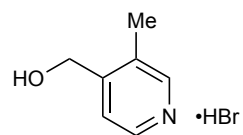

<sup>13</sup>C NMR (DMSO-d<sub>6</sub>, 126 MHz)

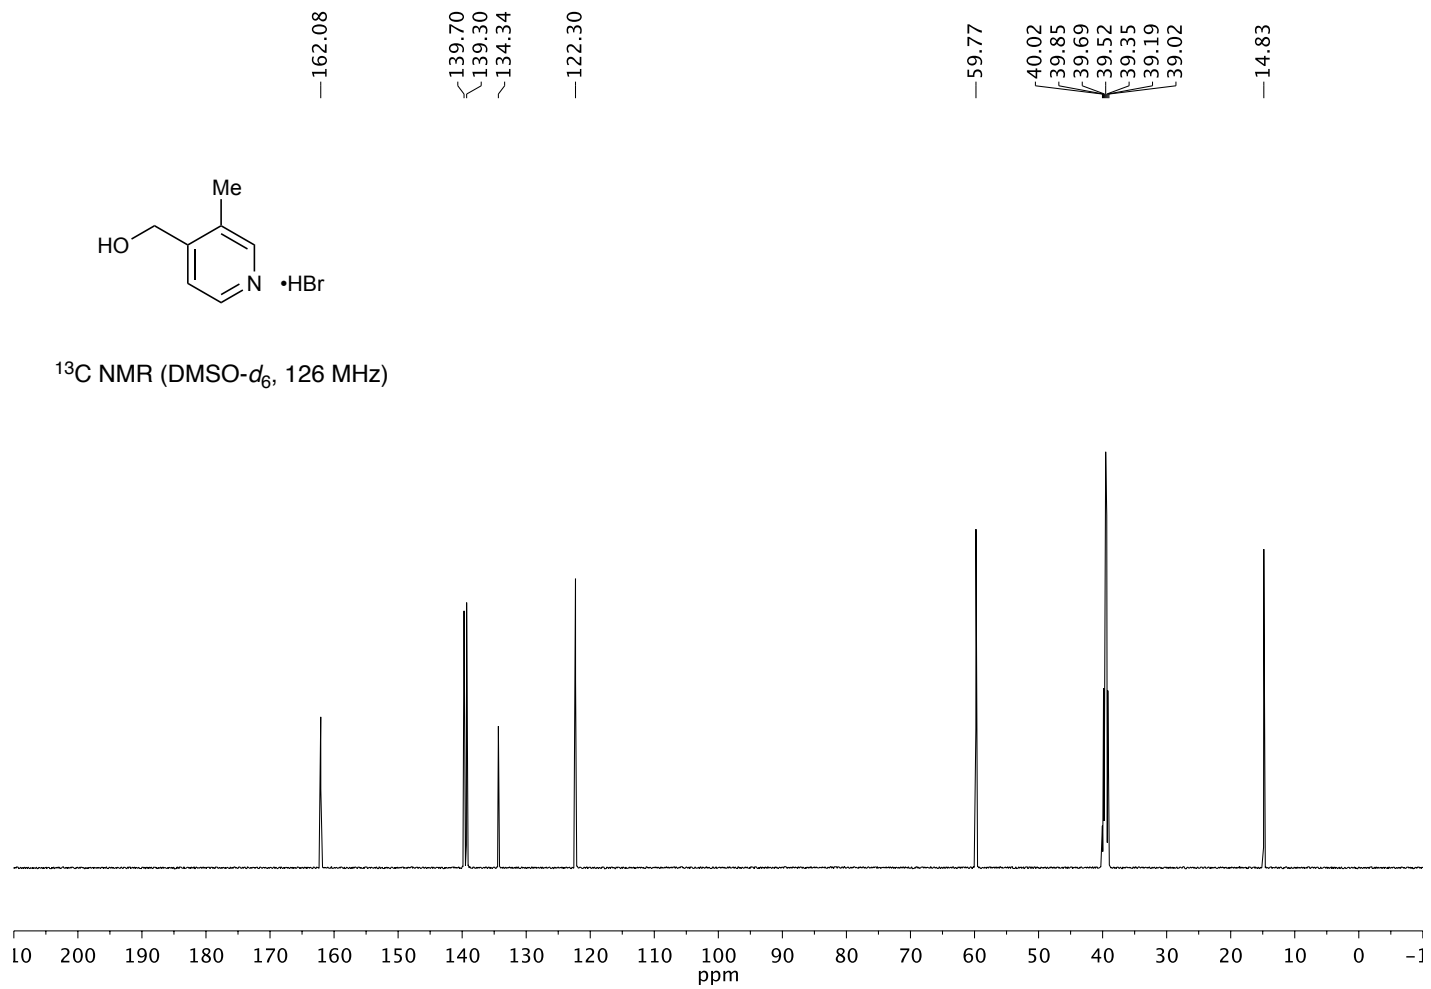

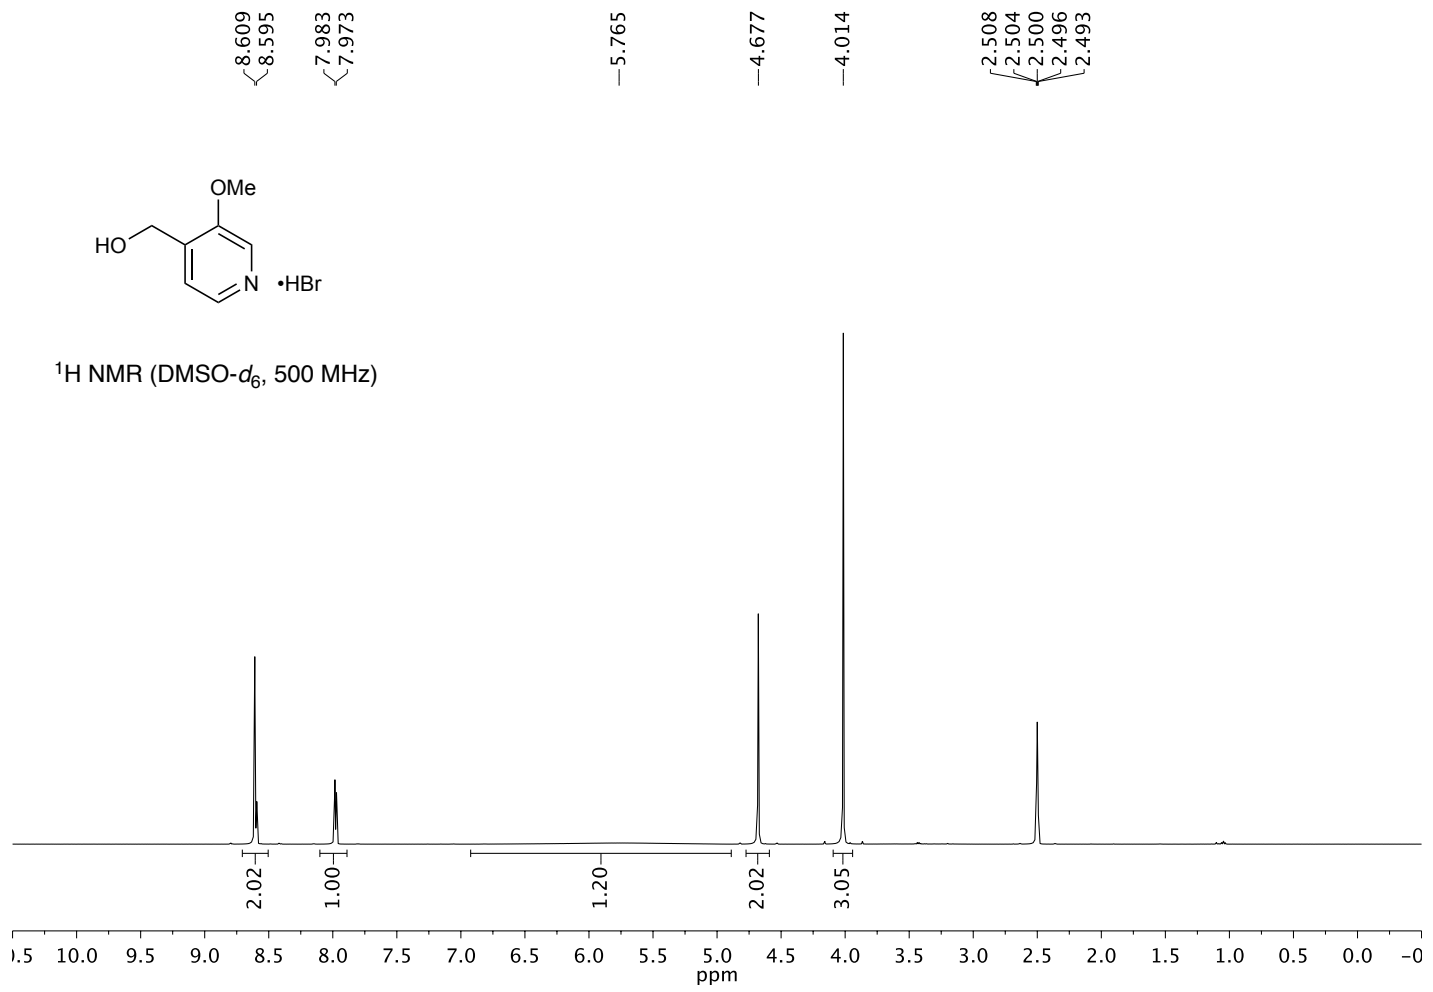

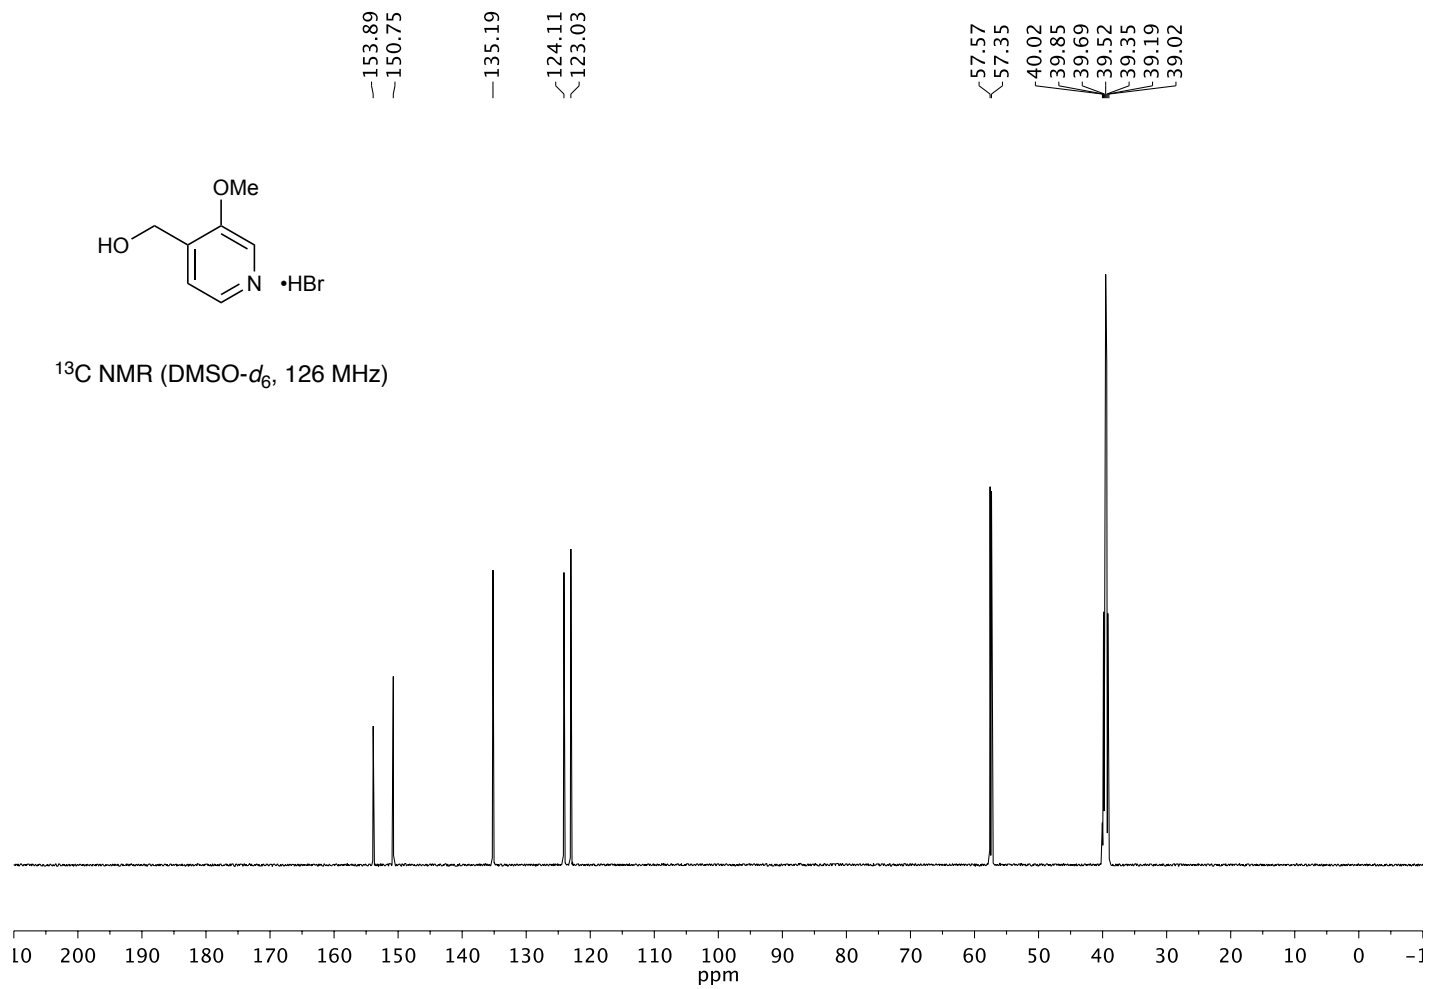

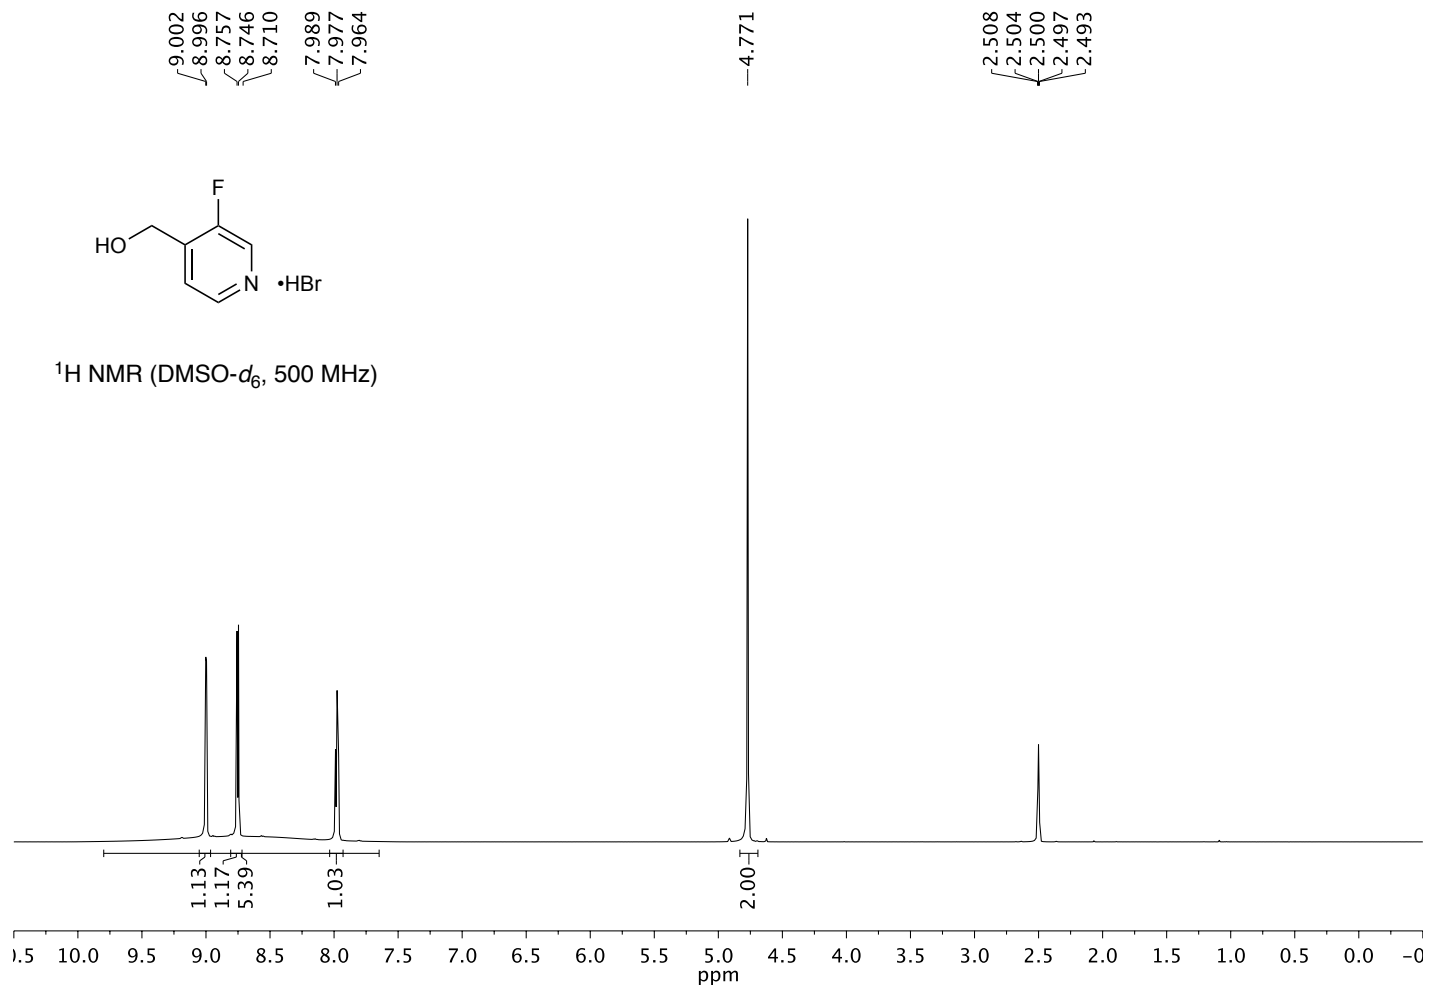



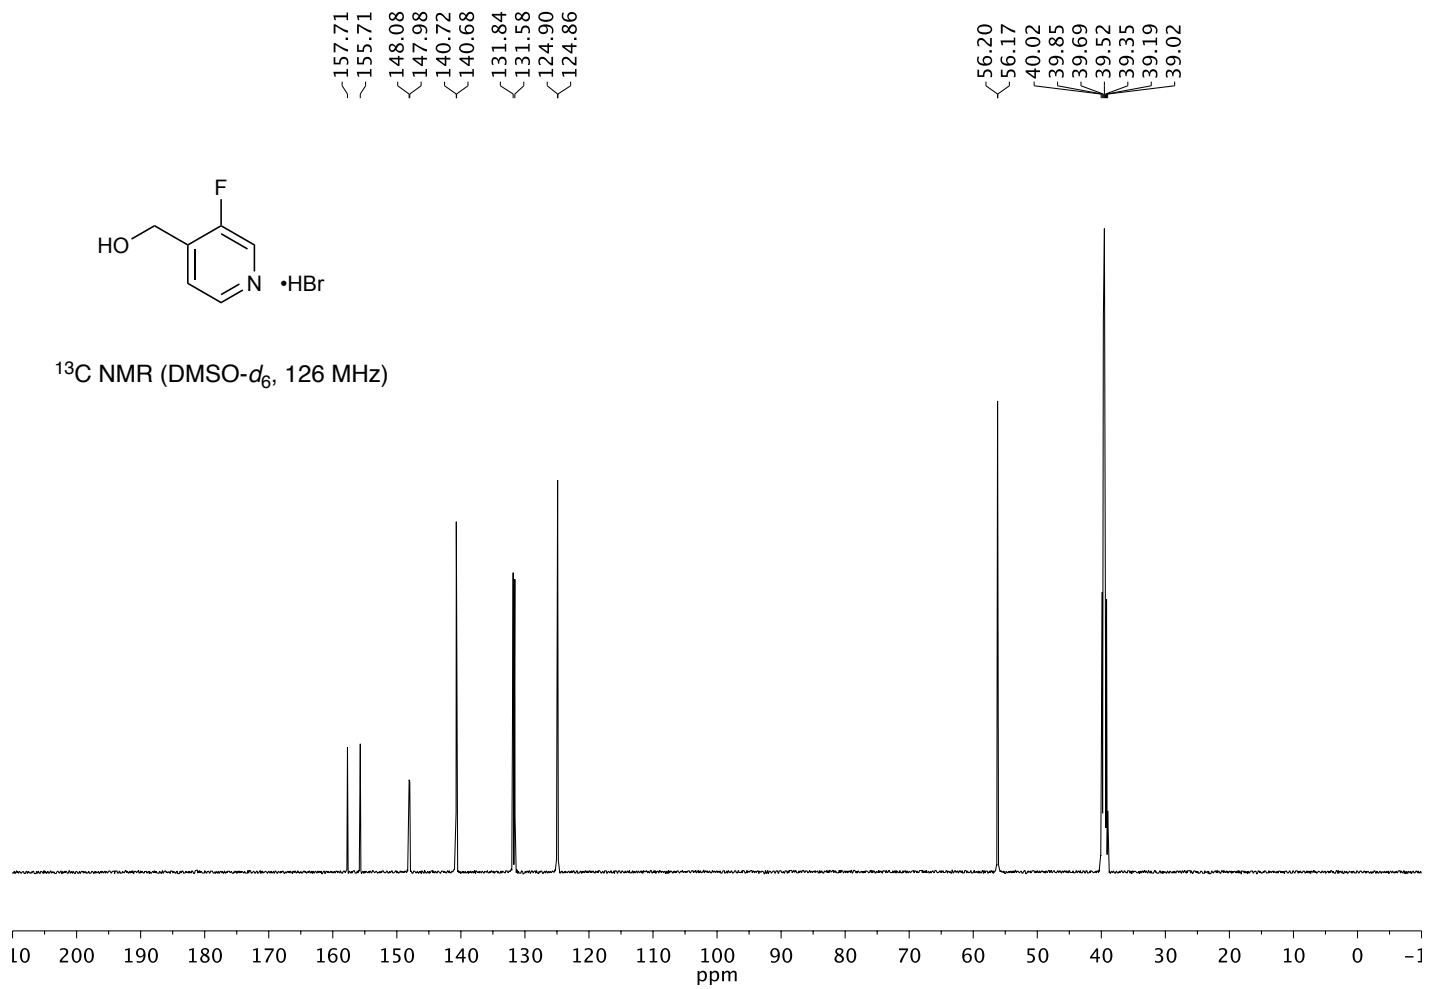

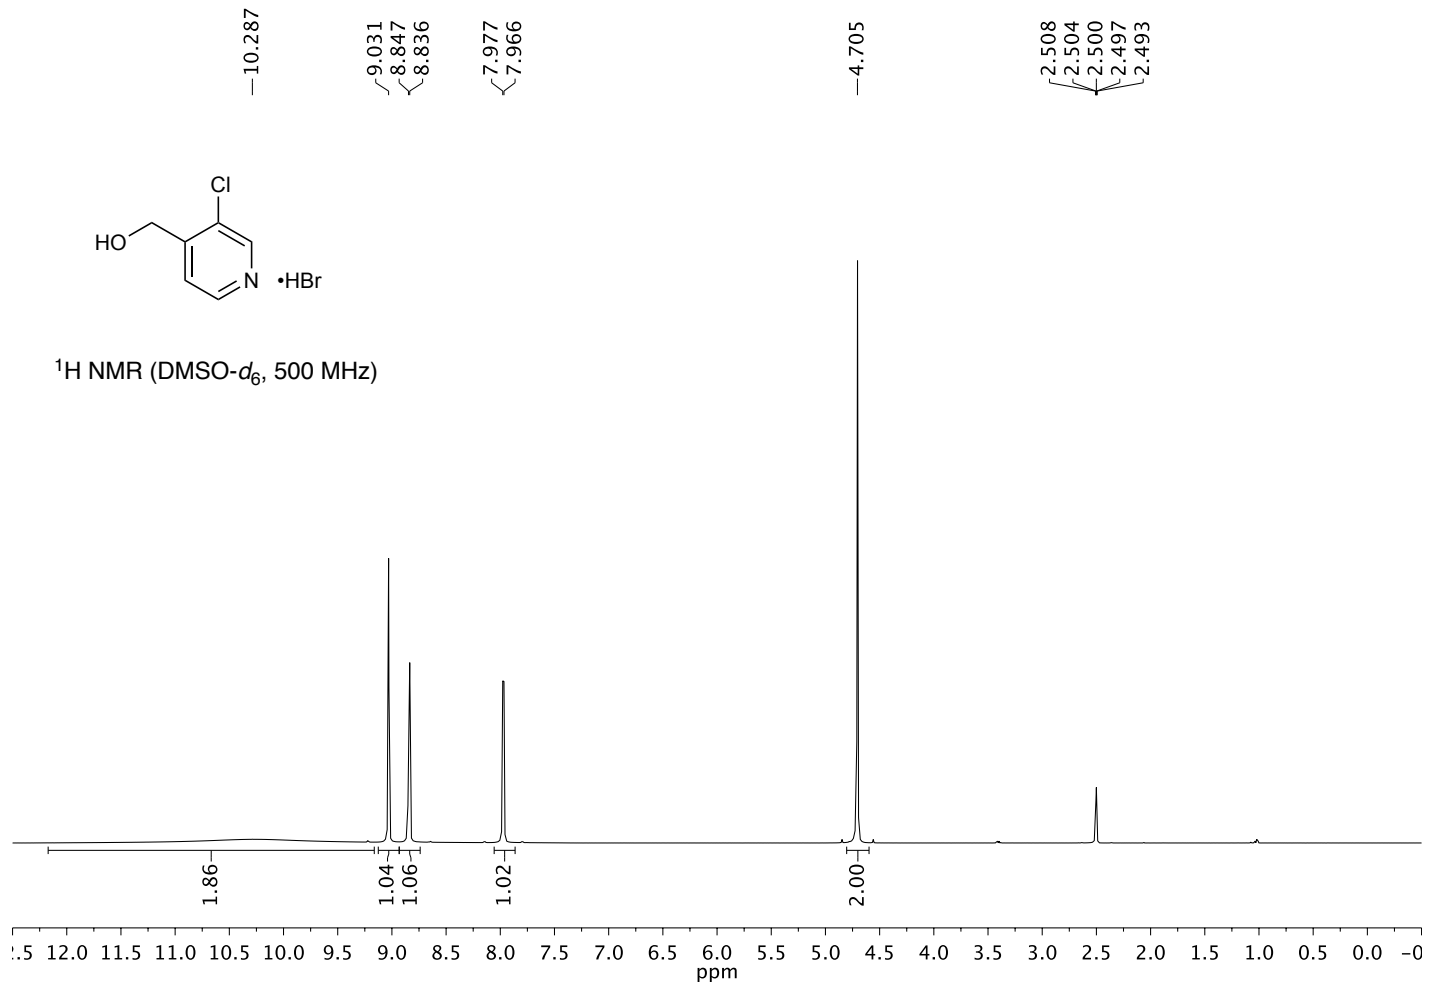

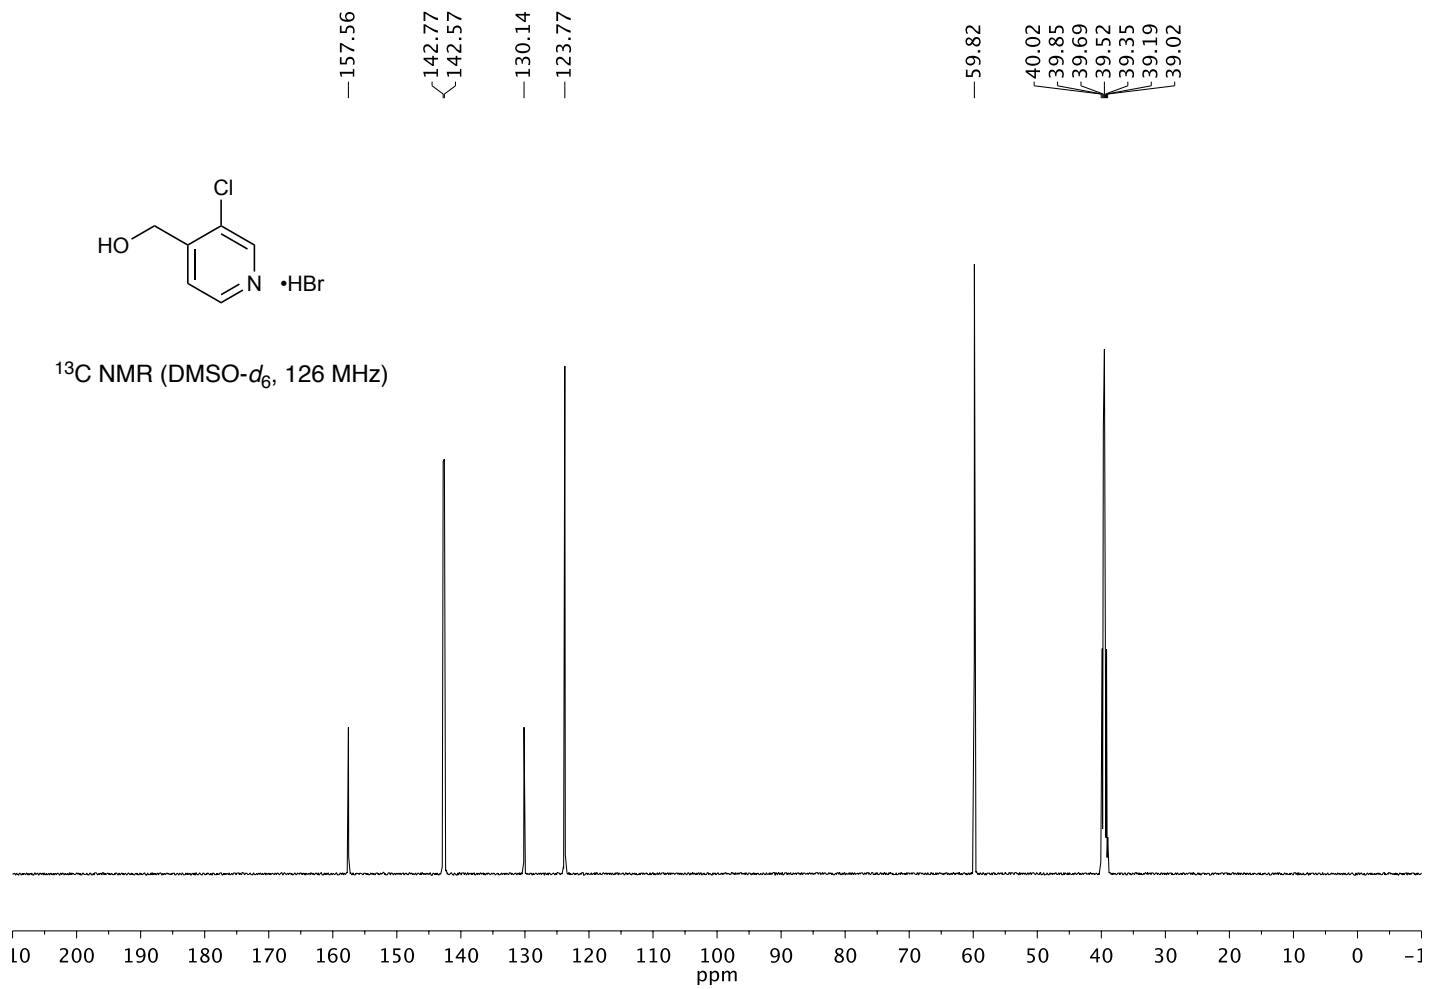

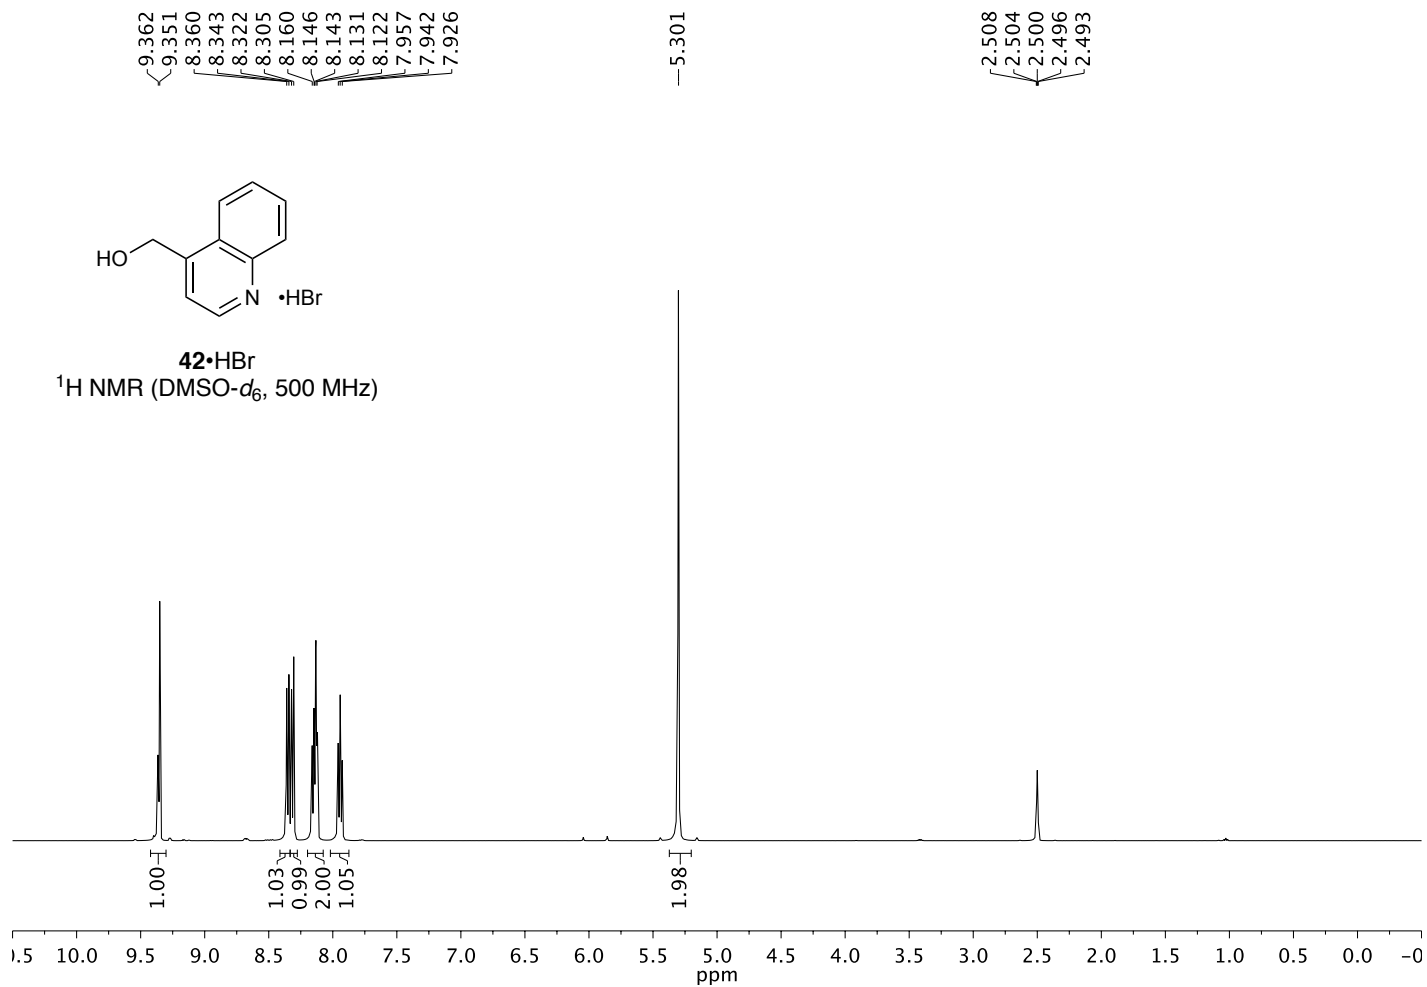

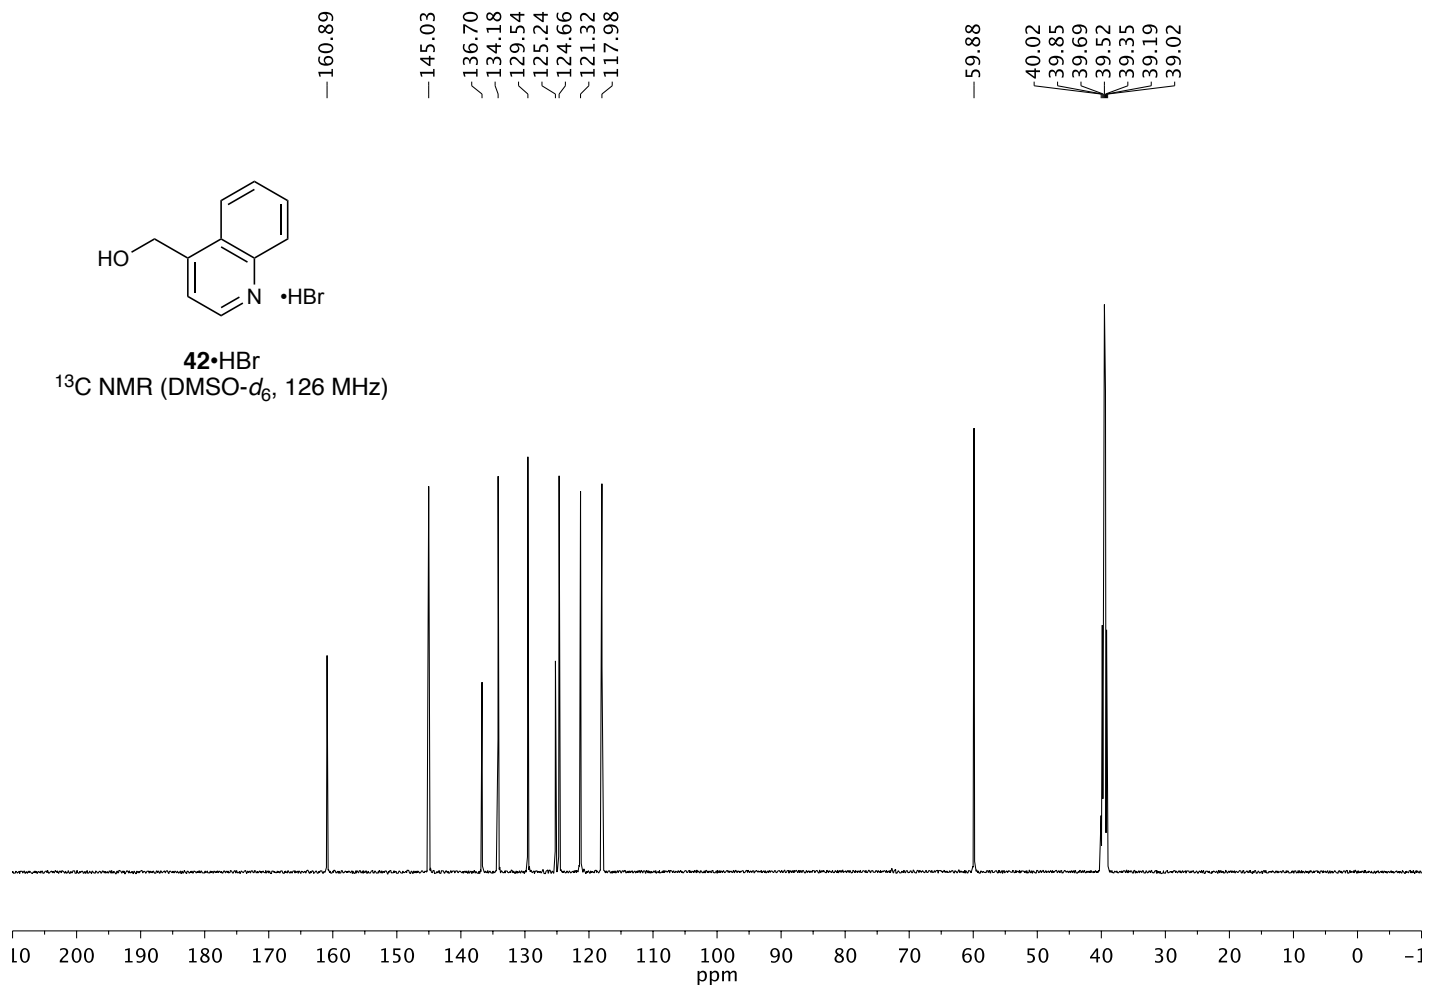

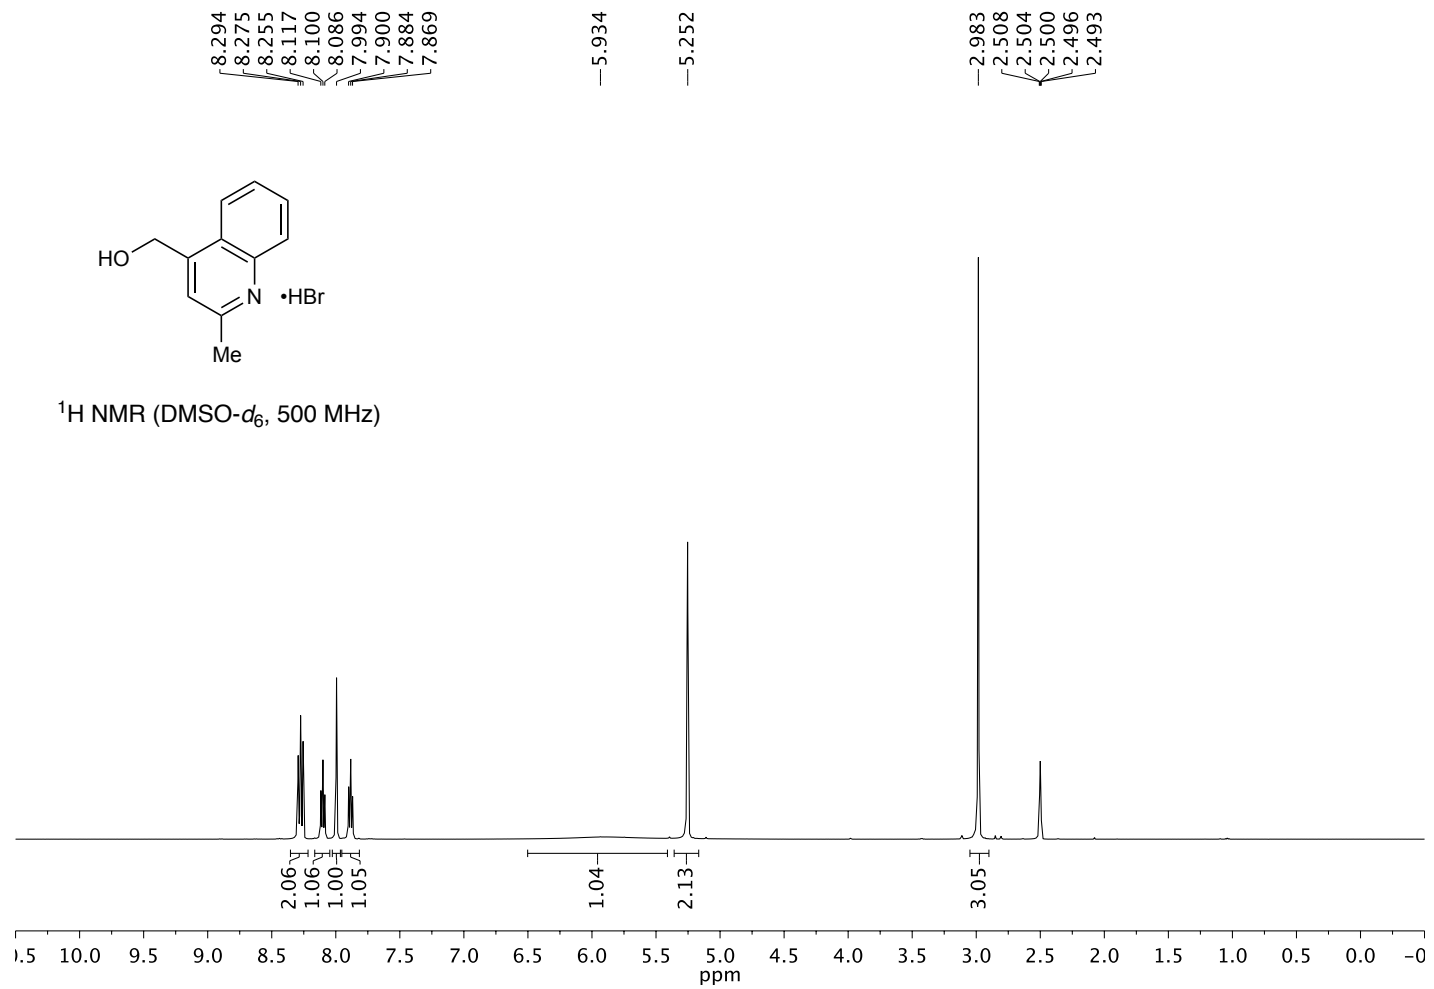

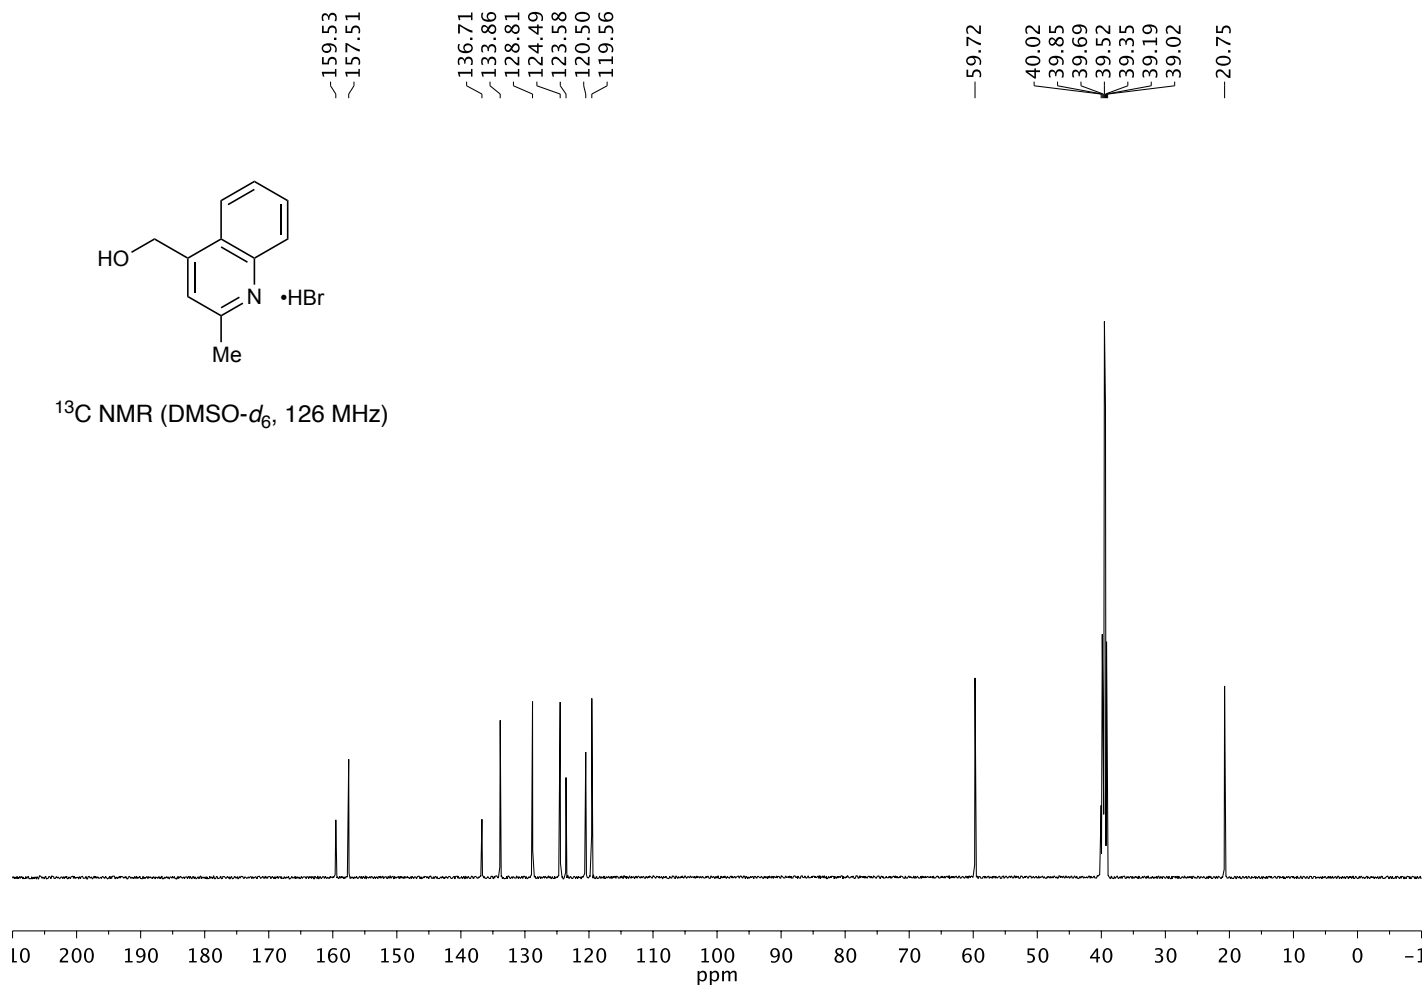

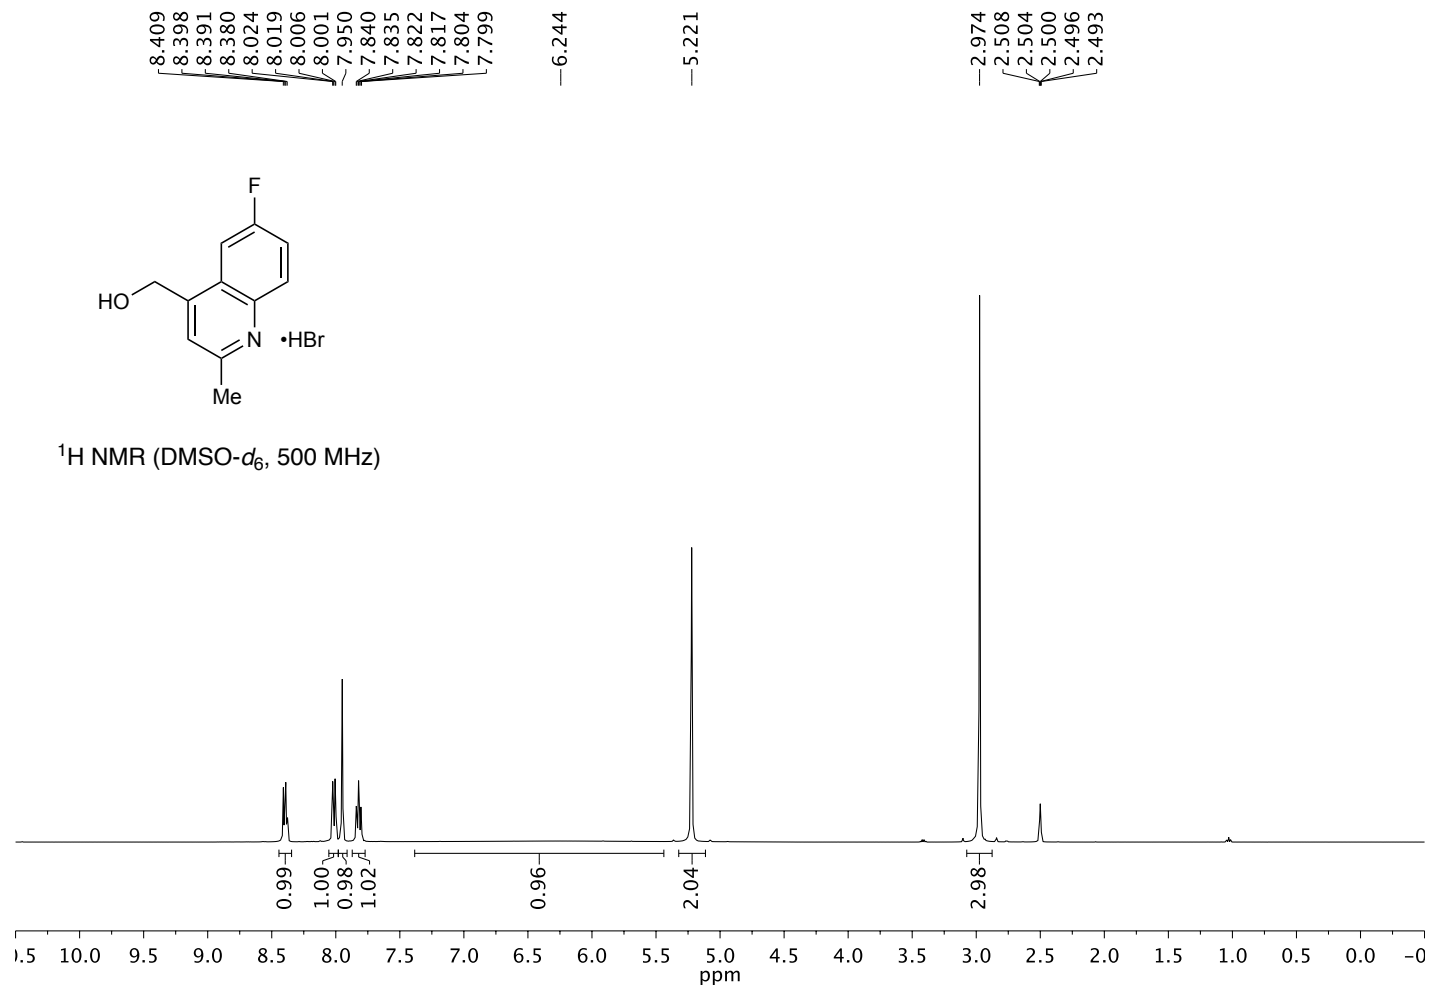



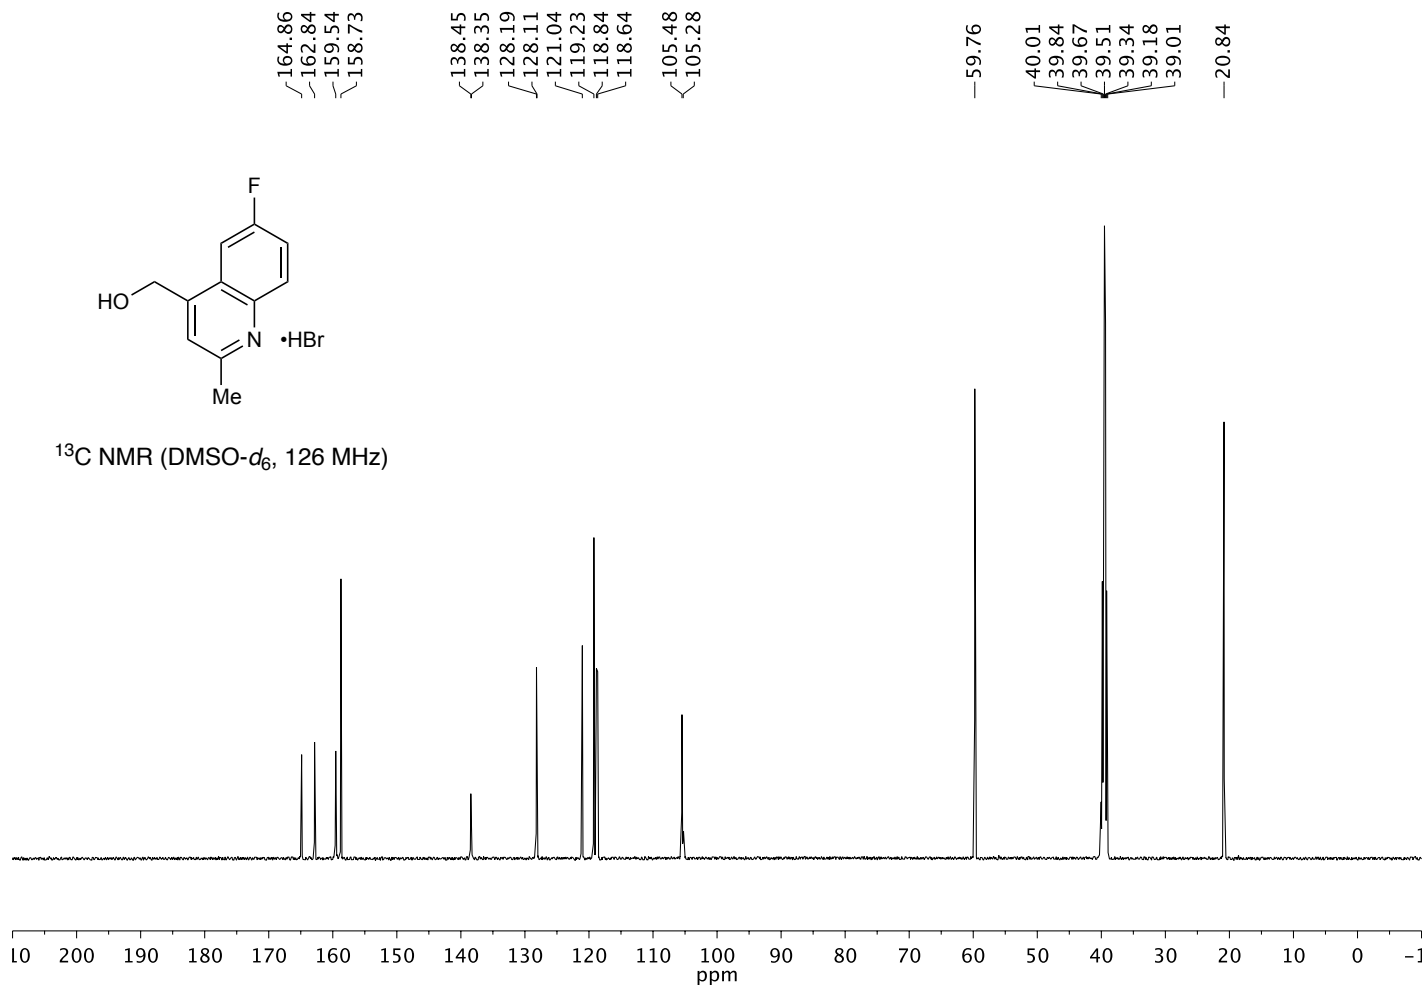

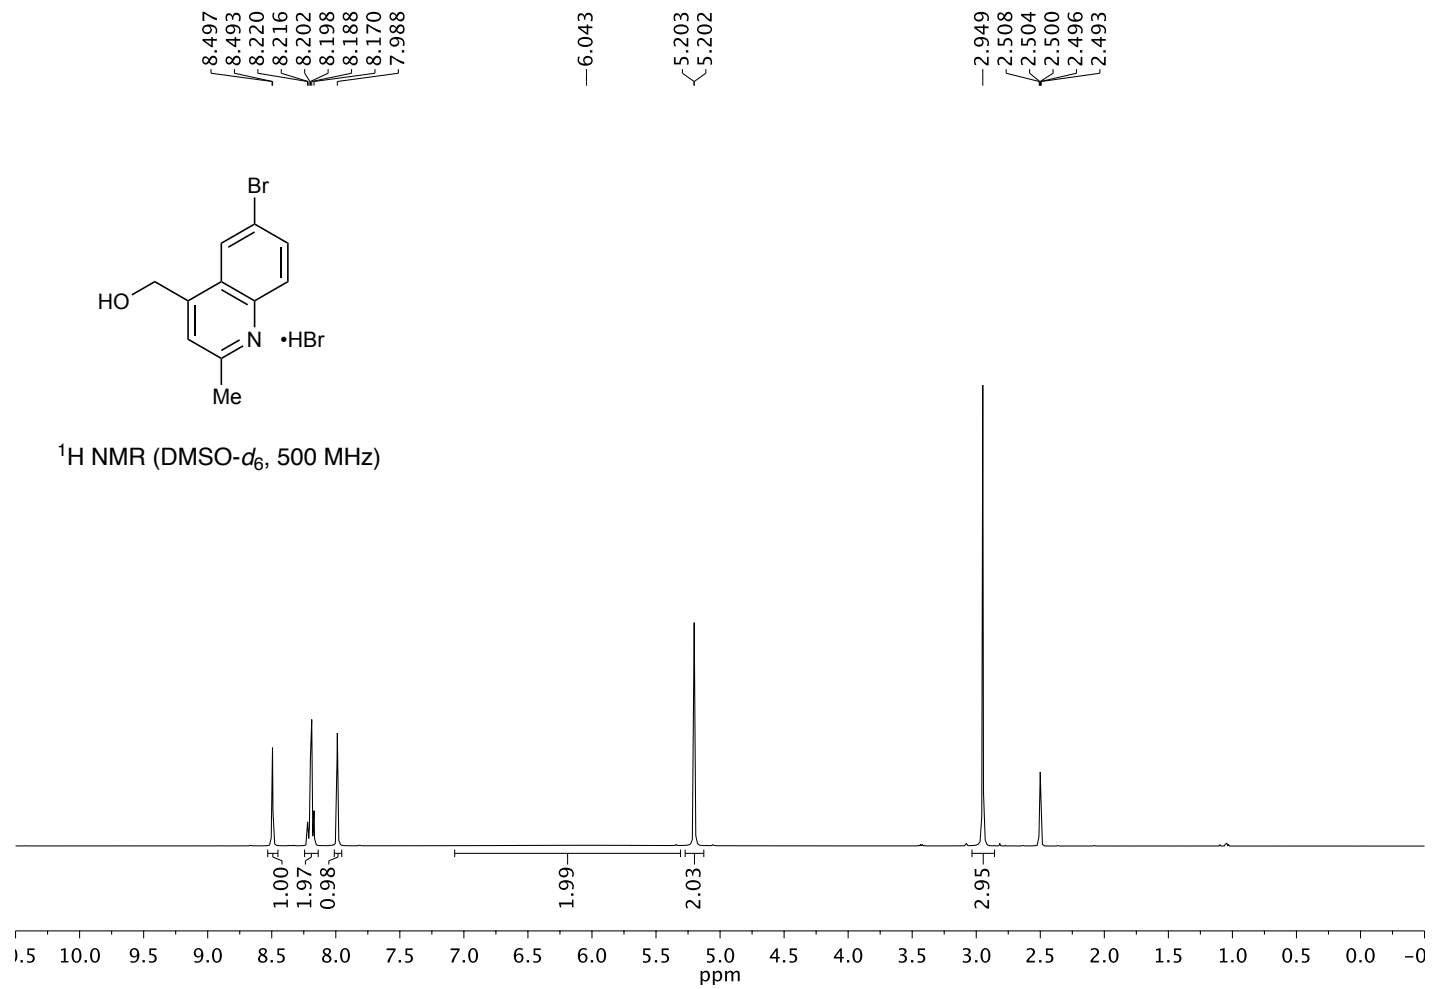

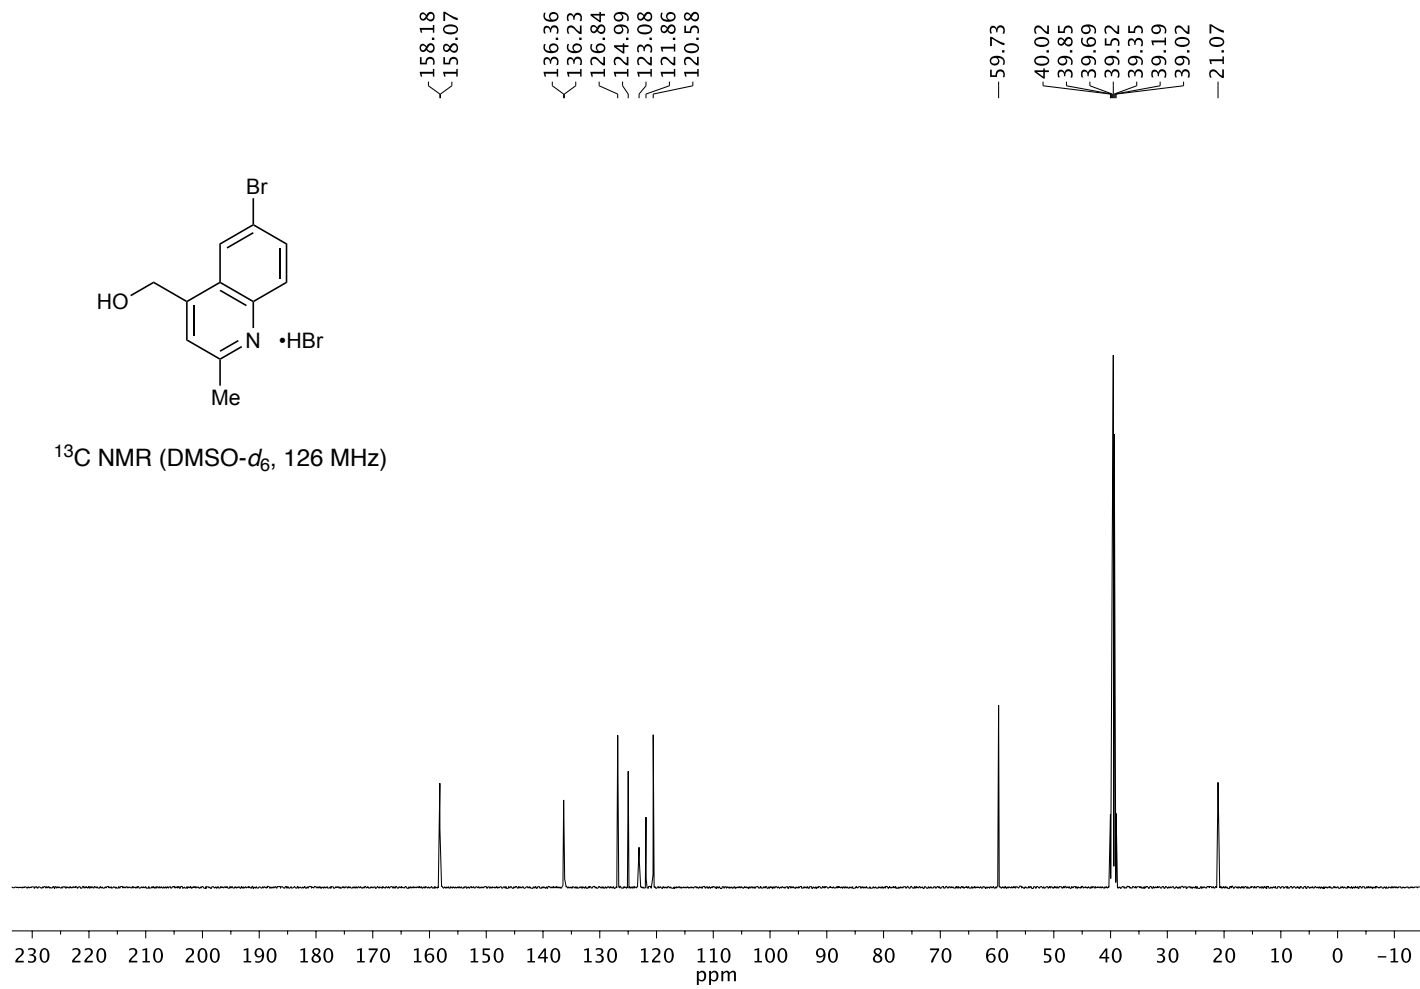

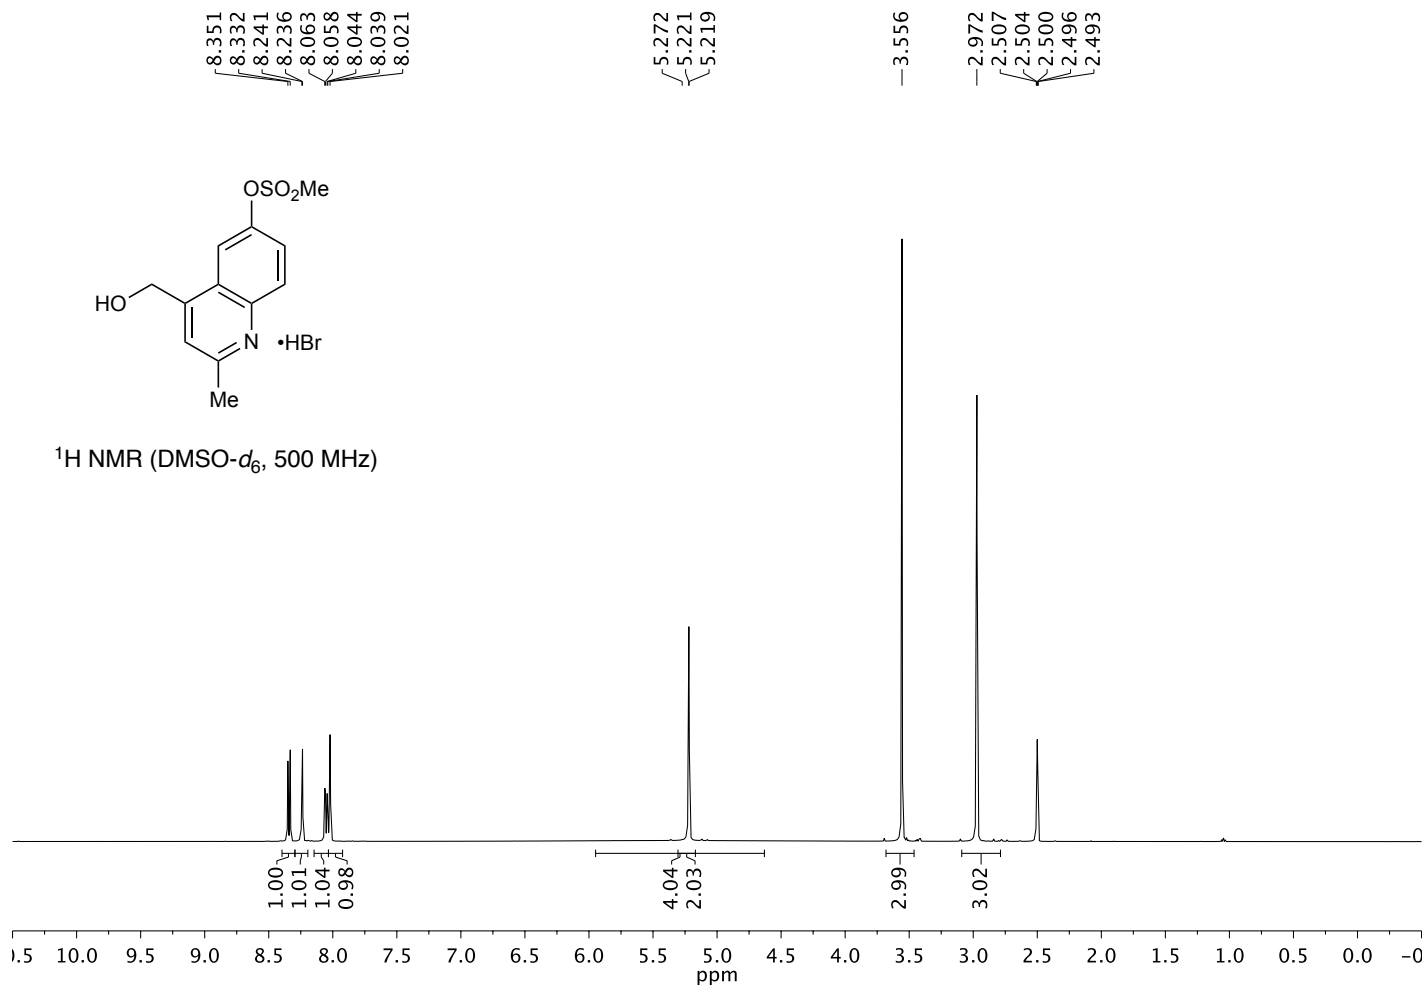

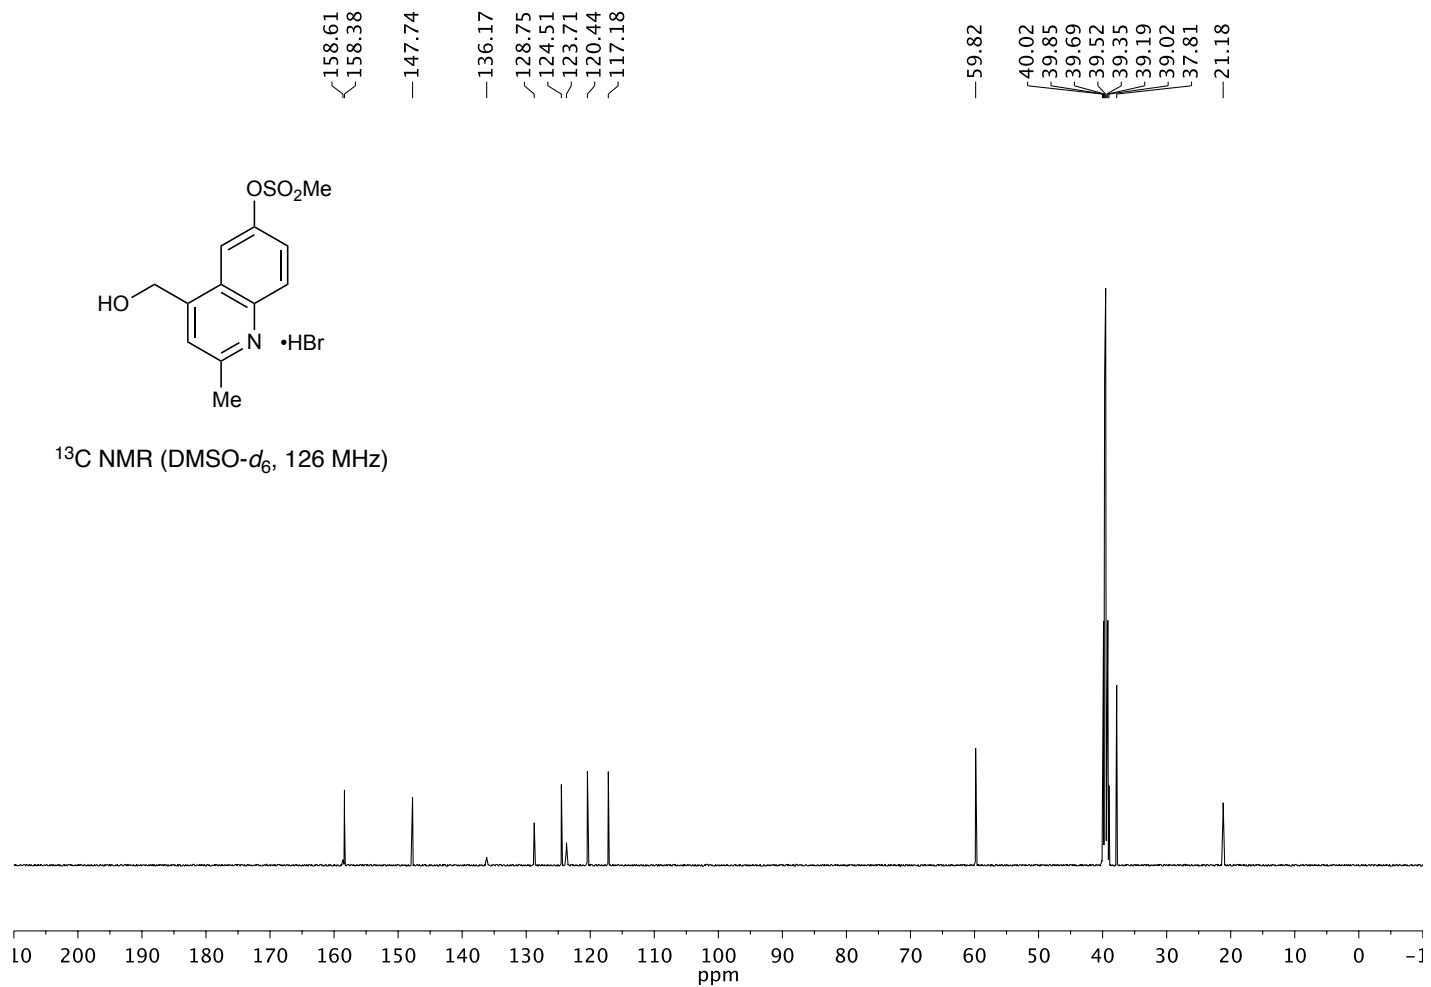

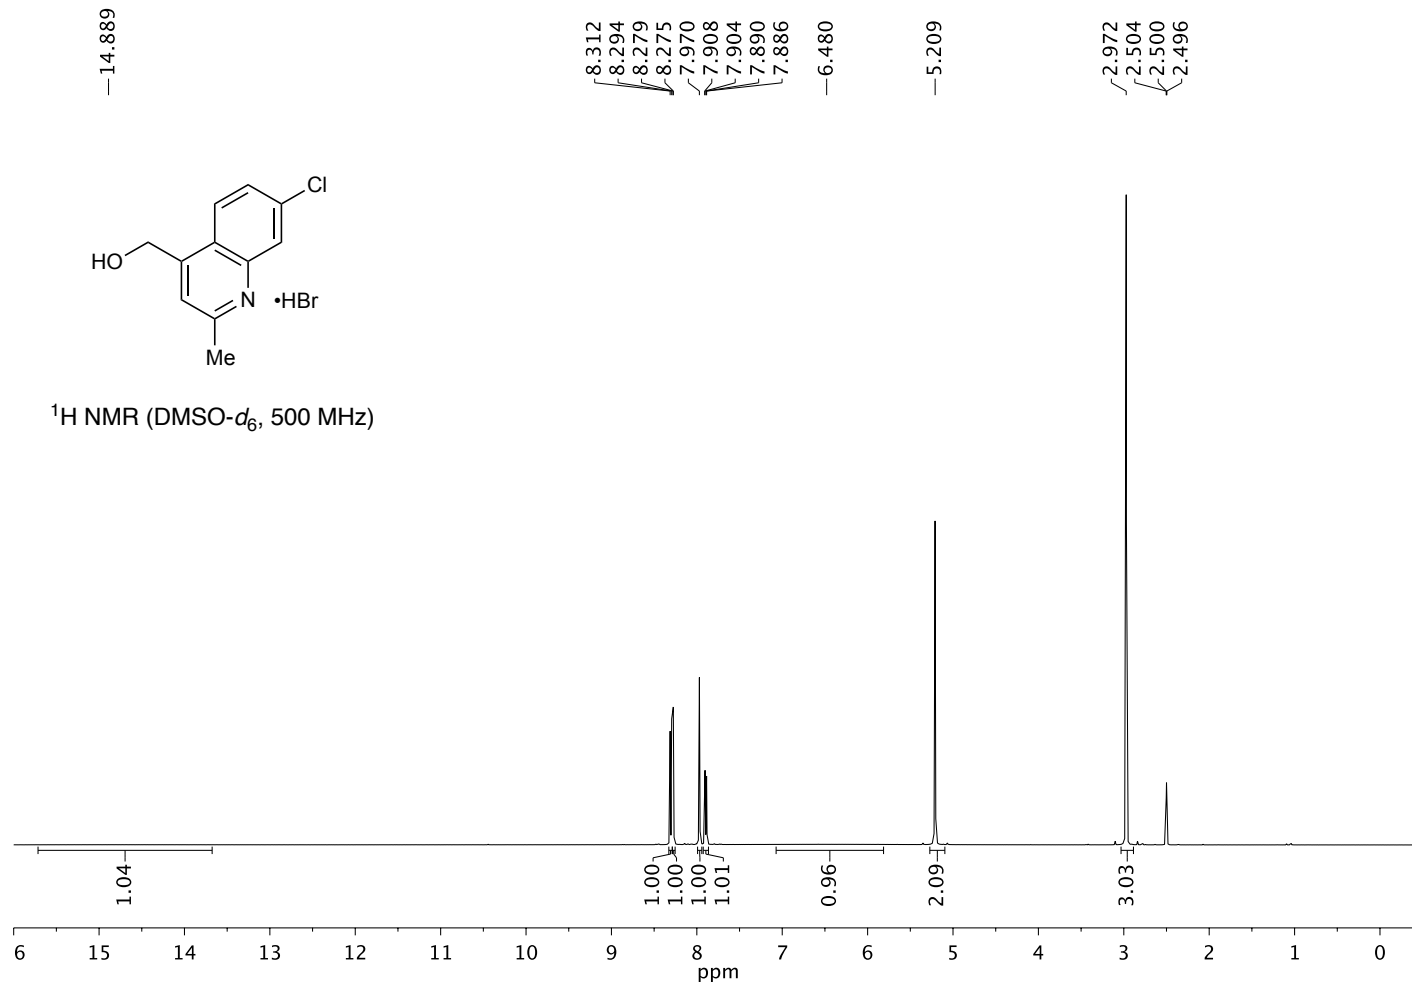

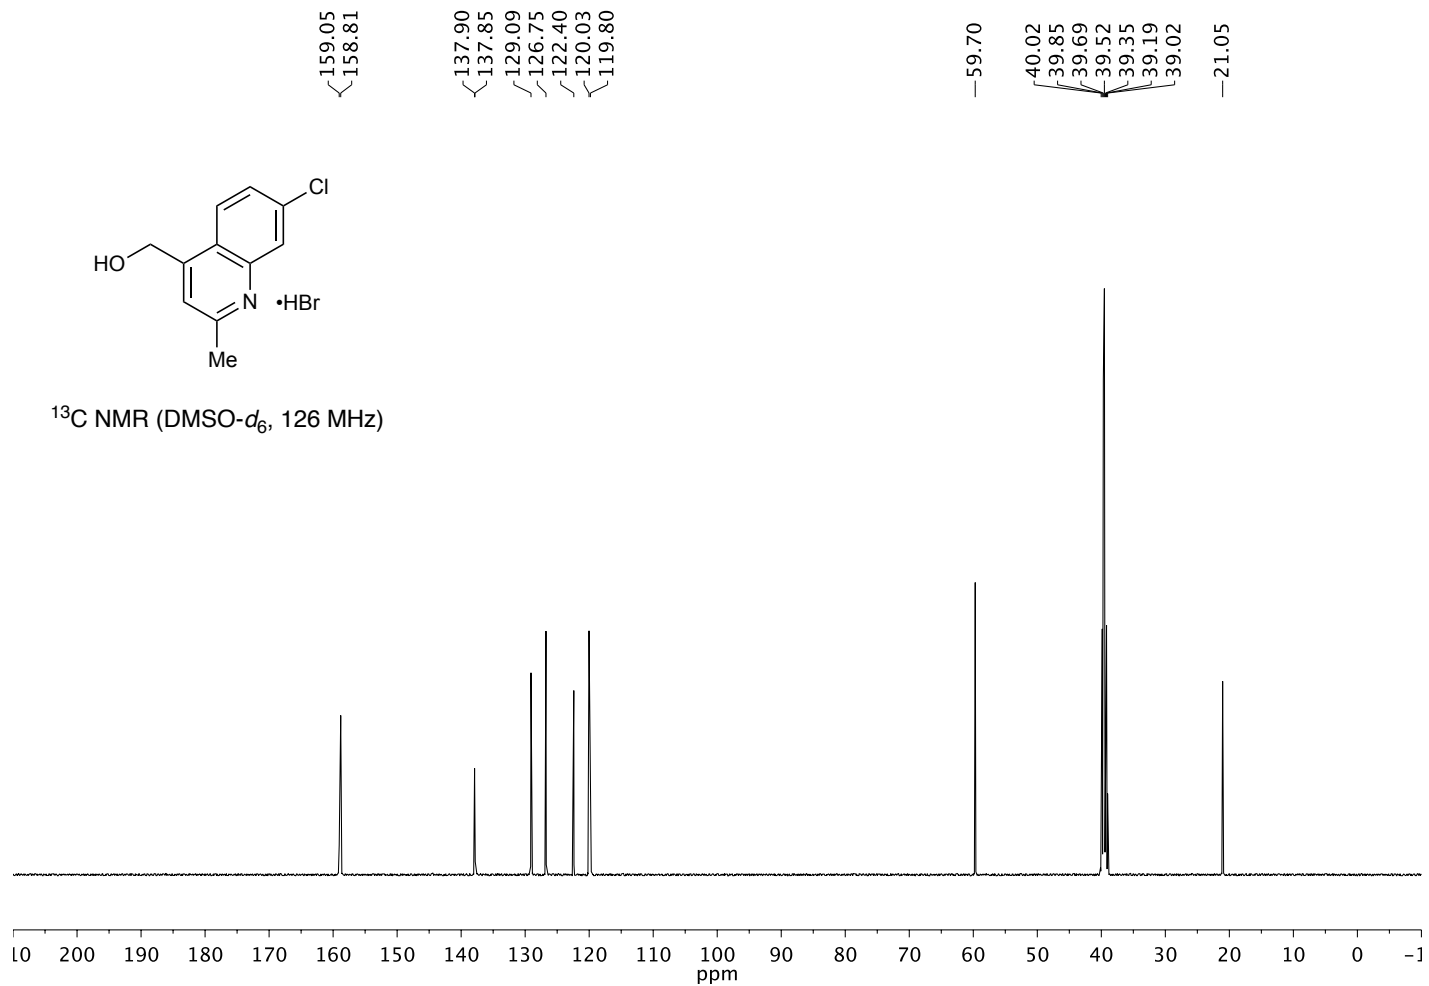

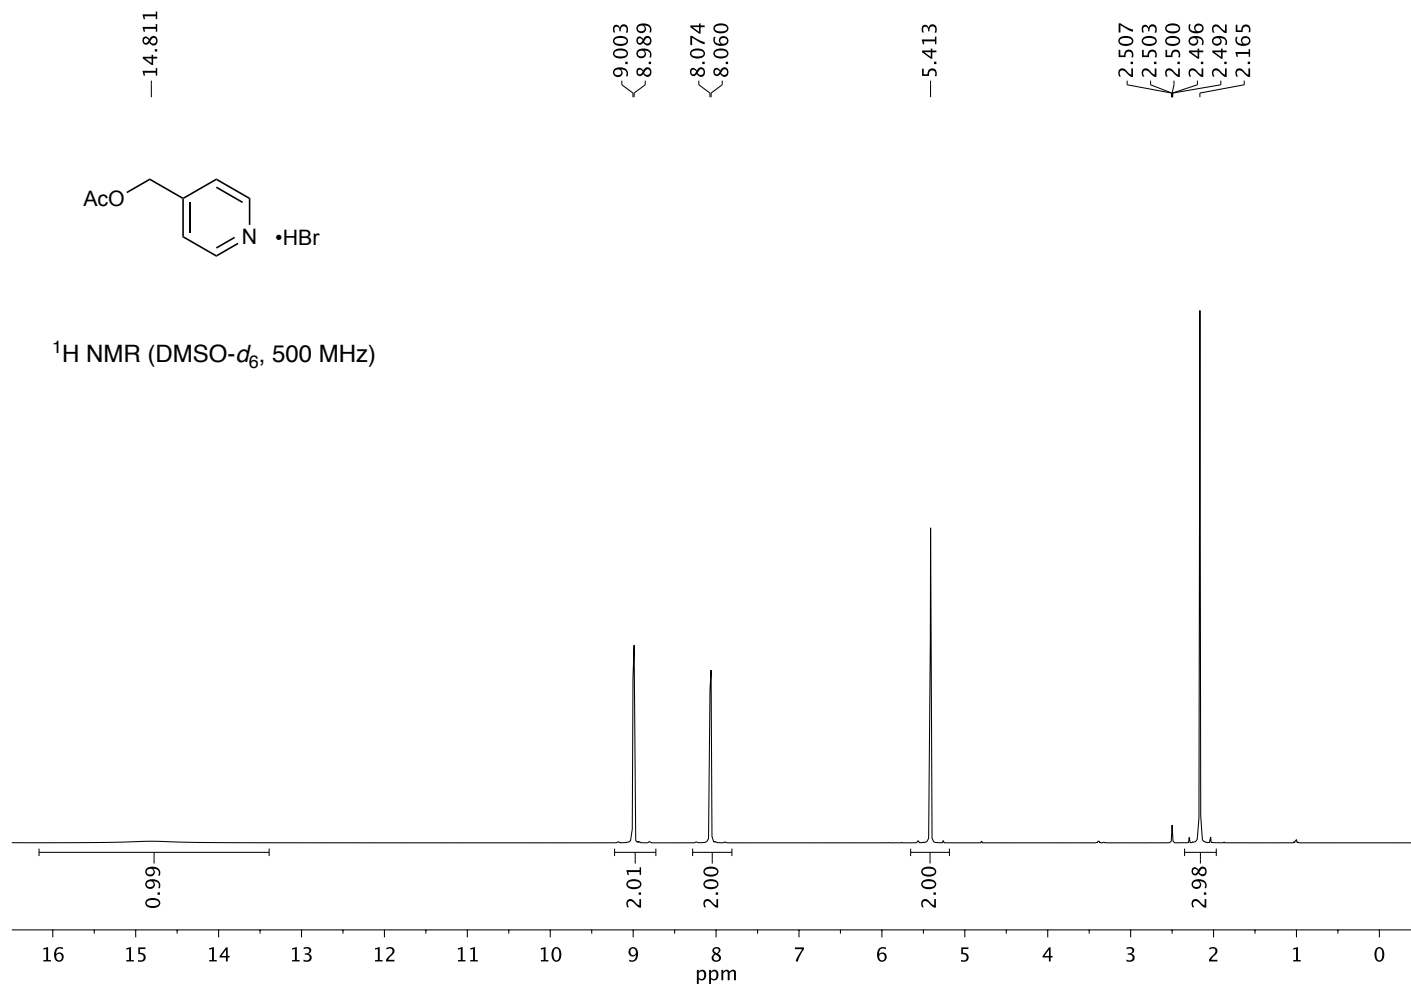



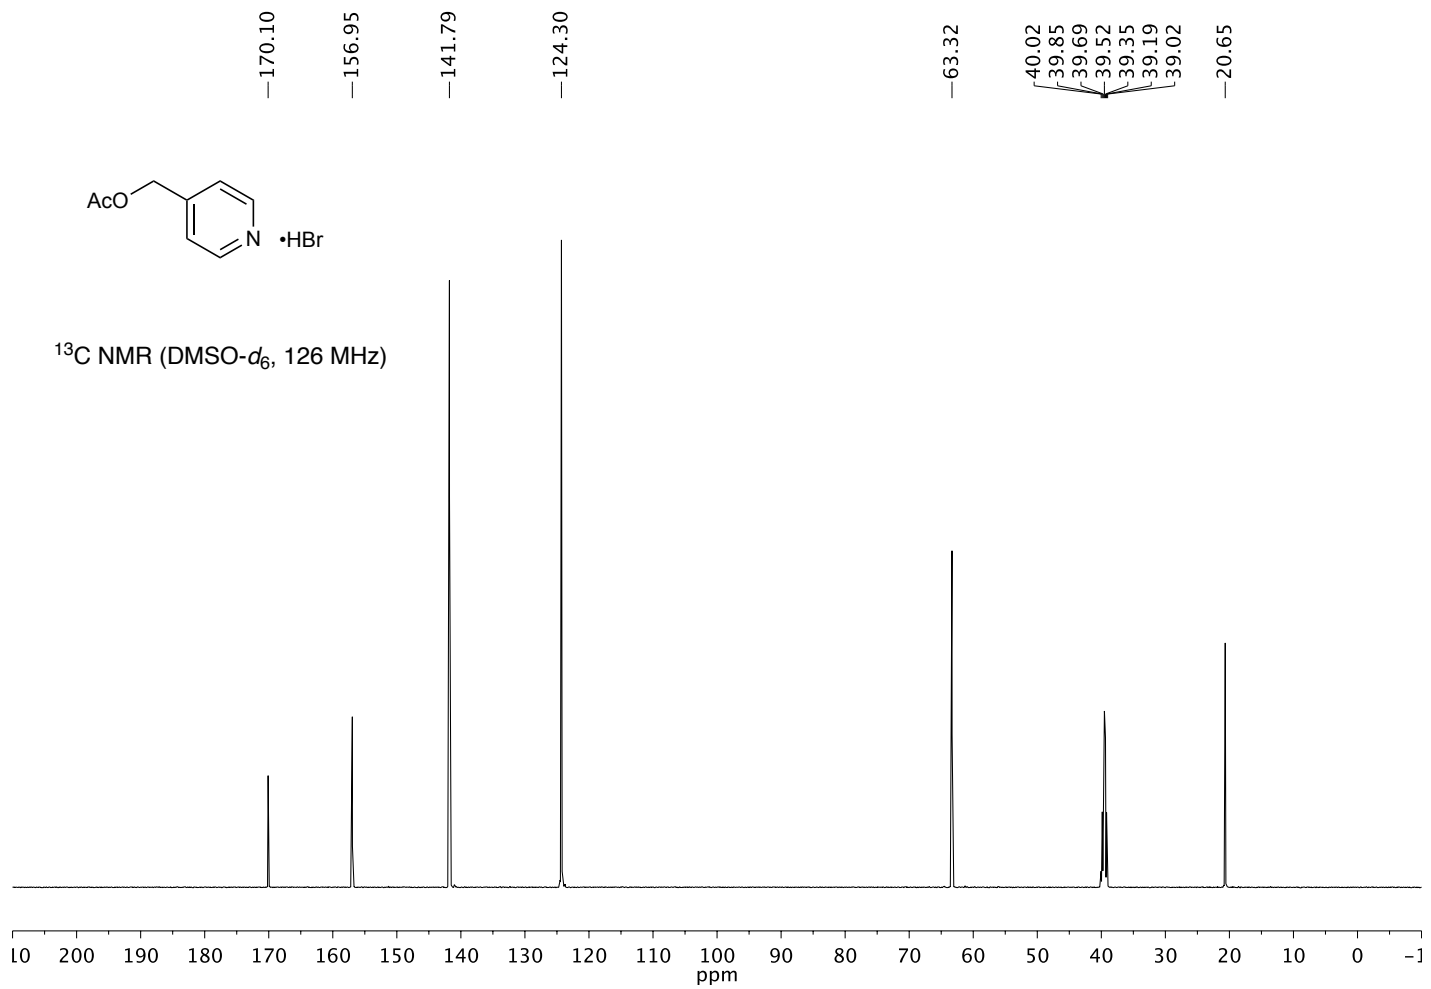

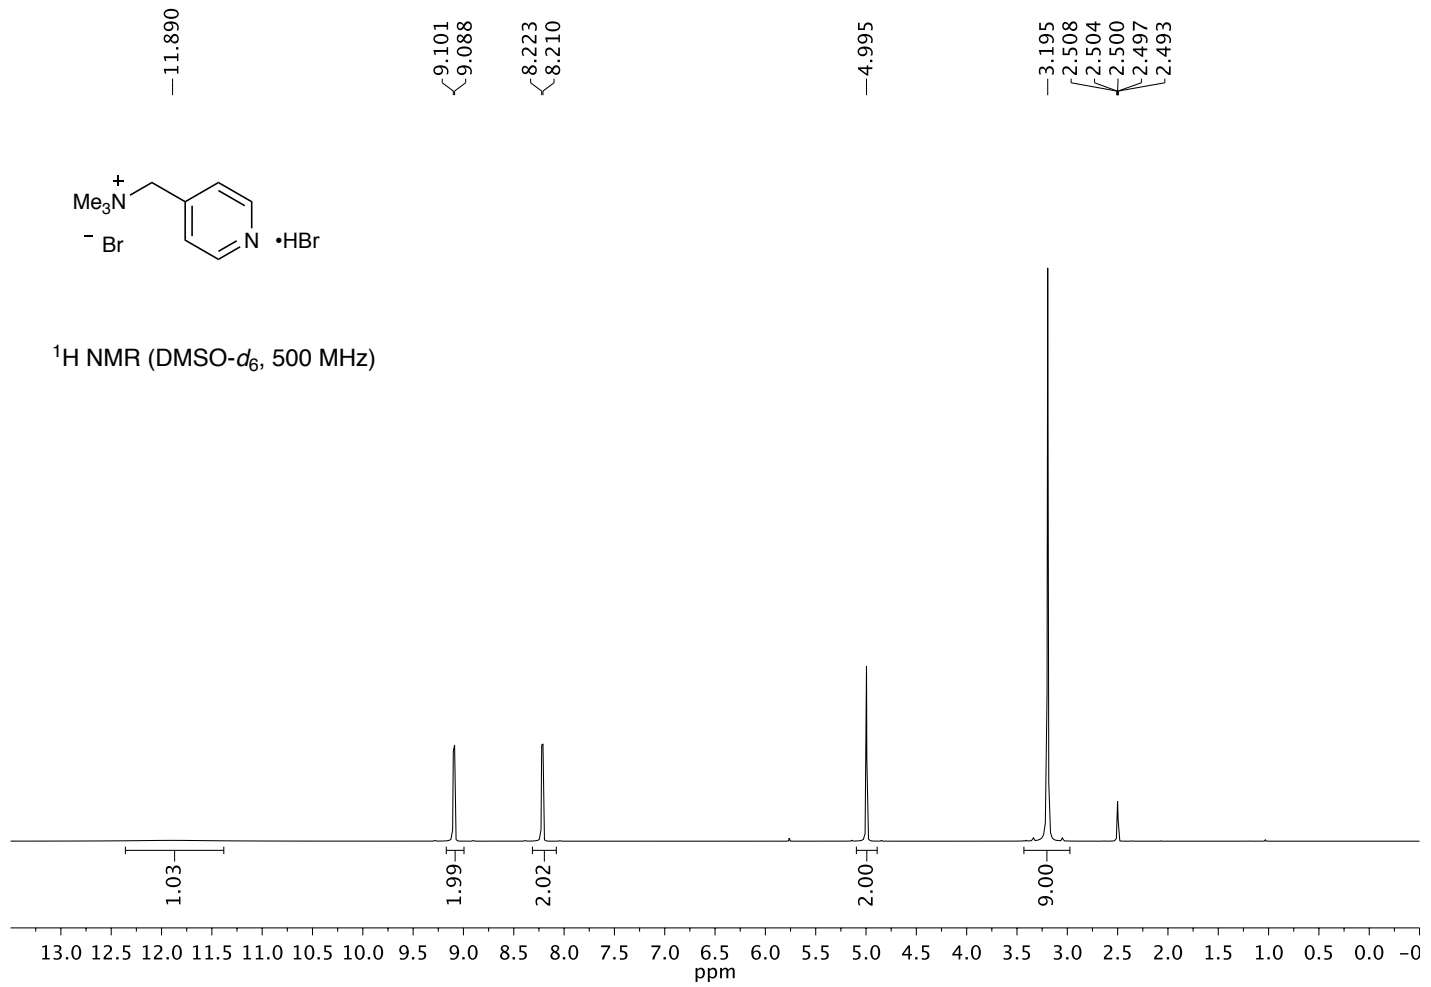

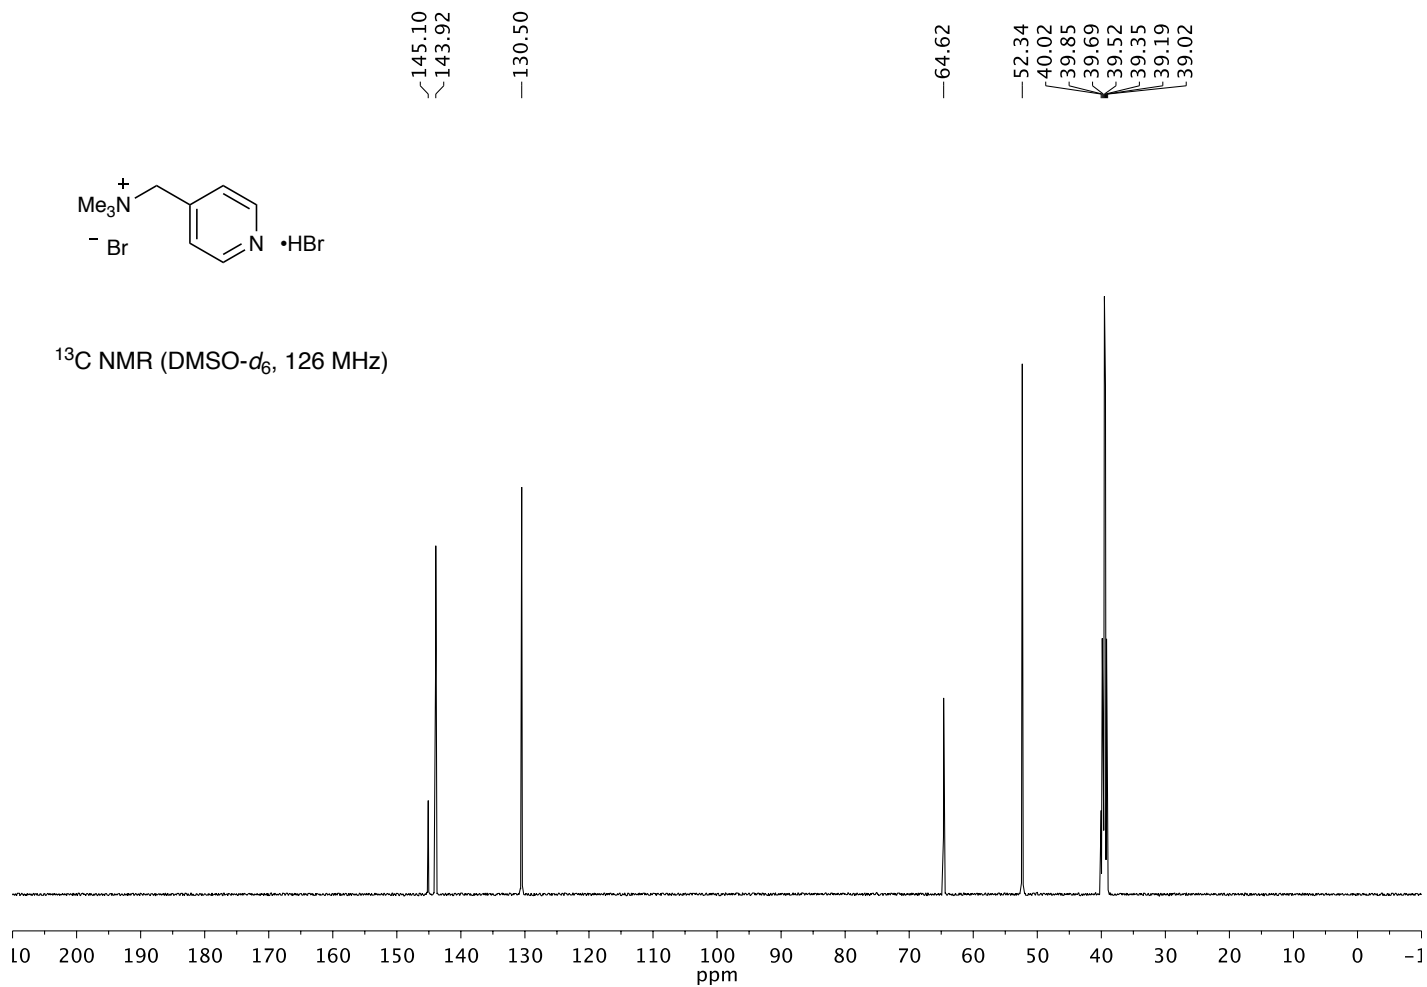

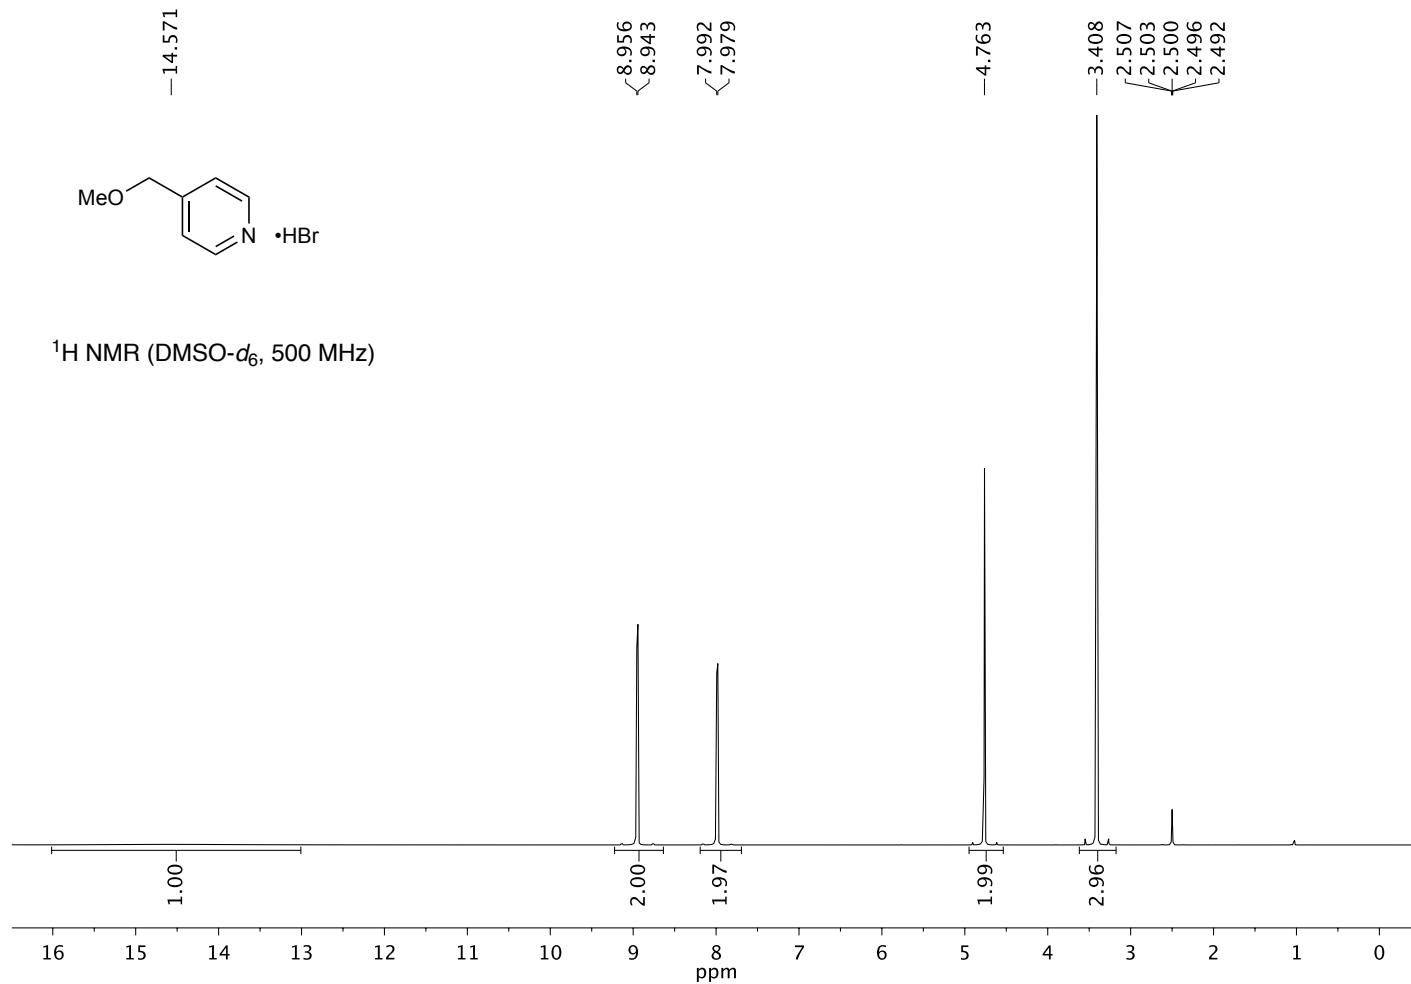

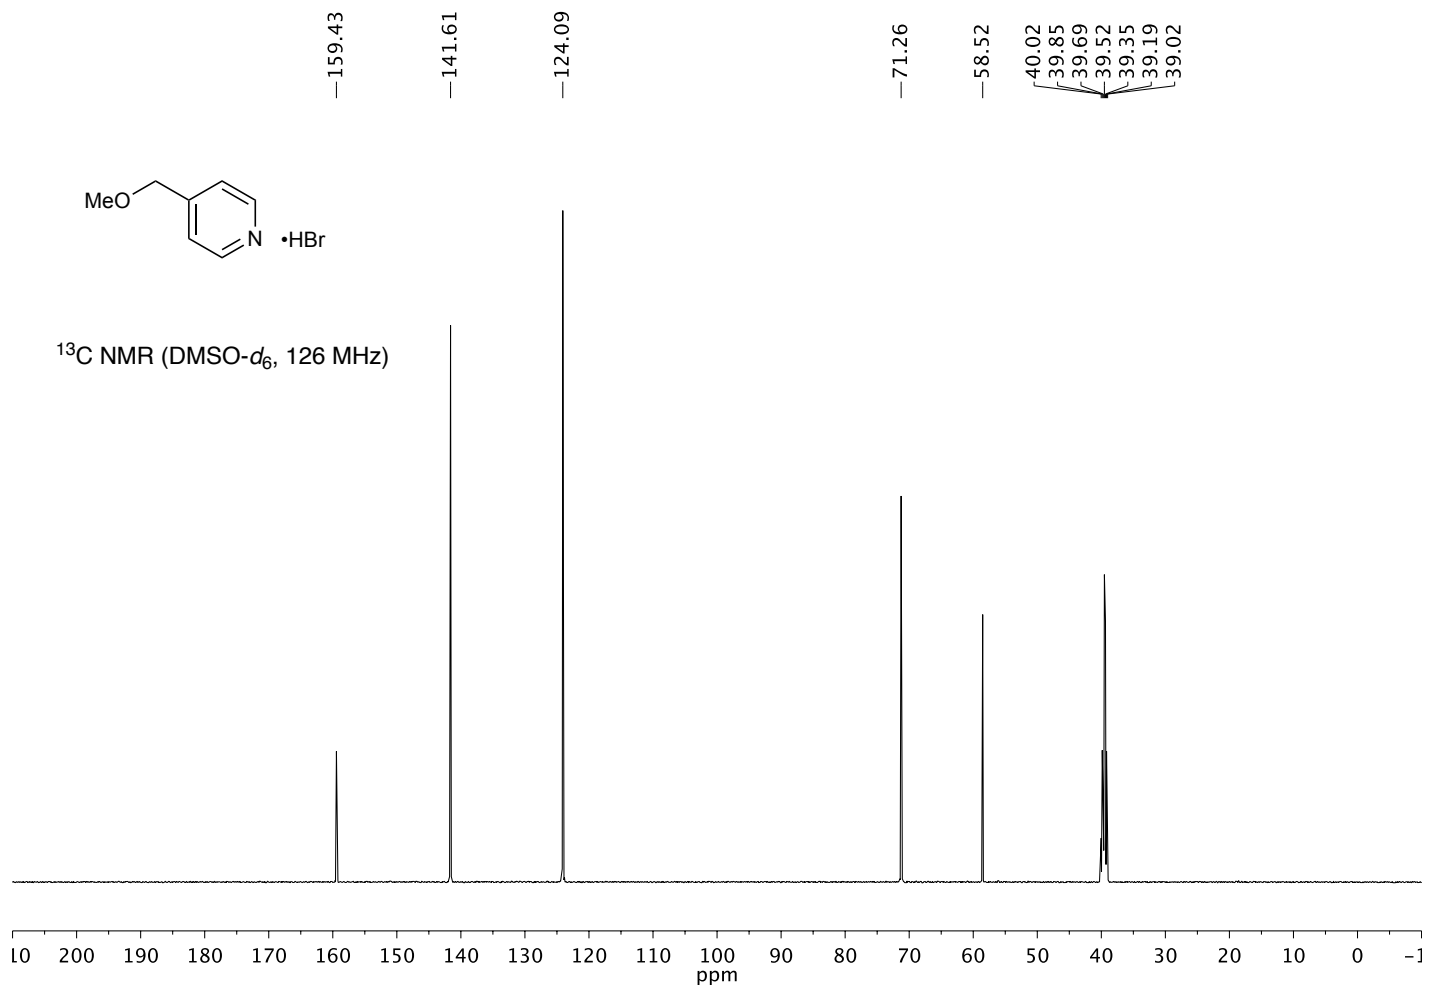



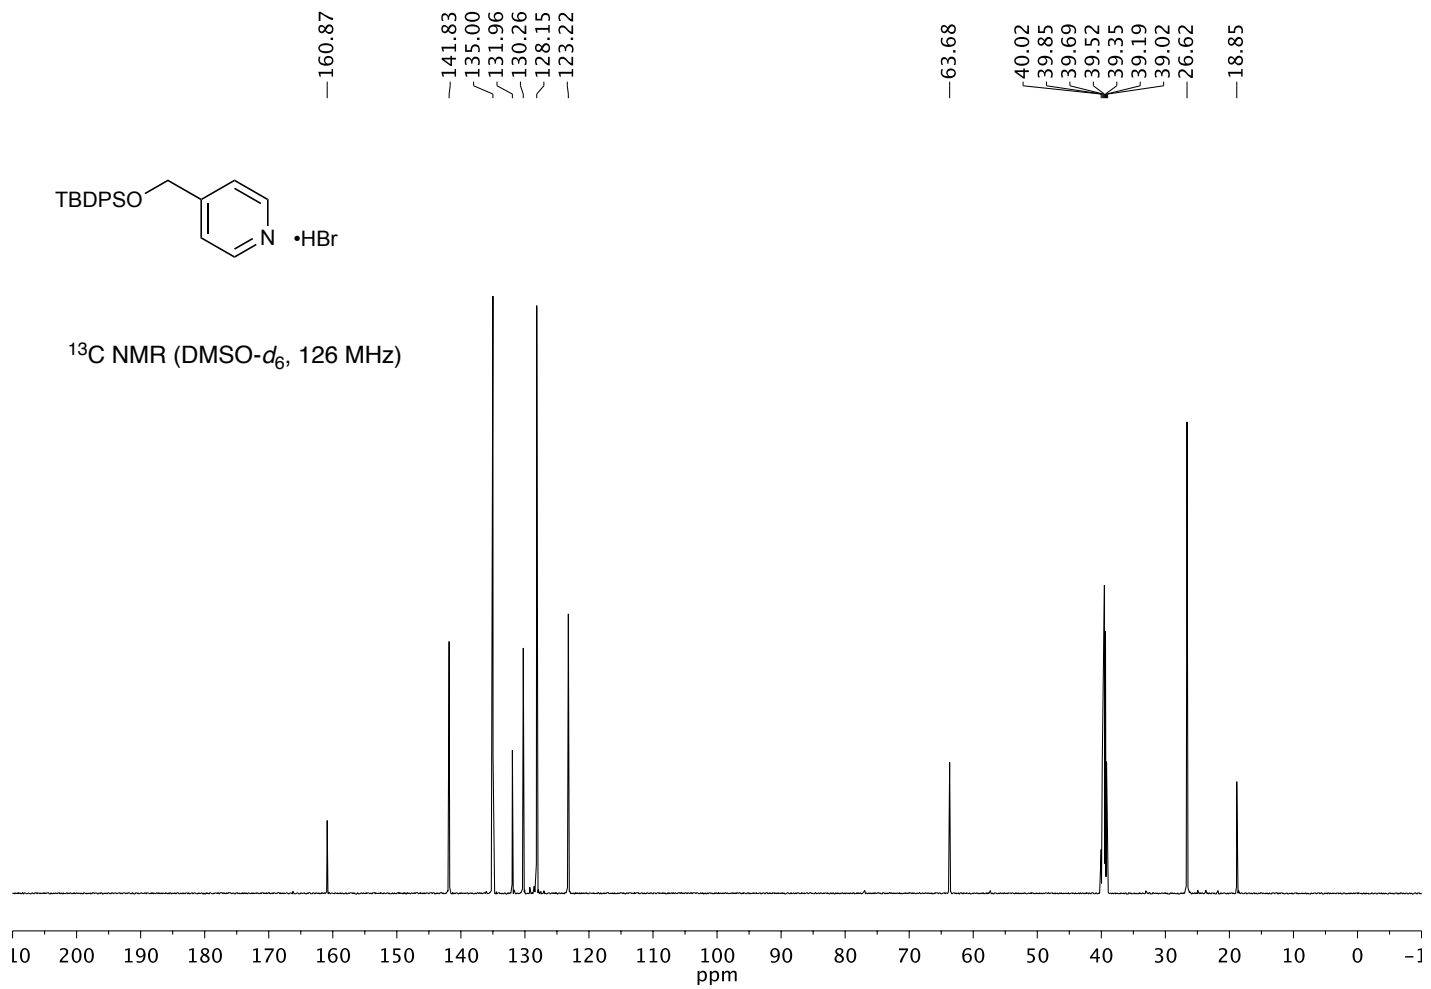

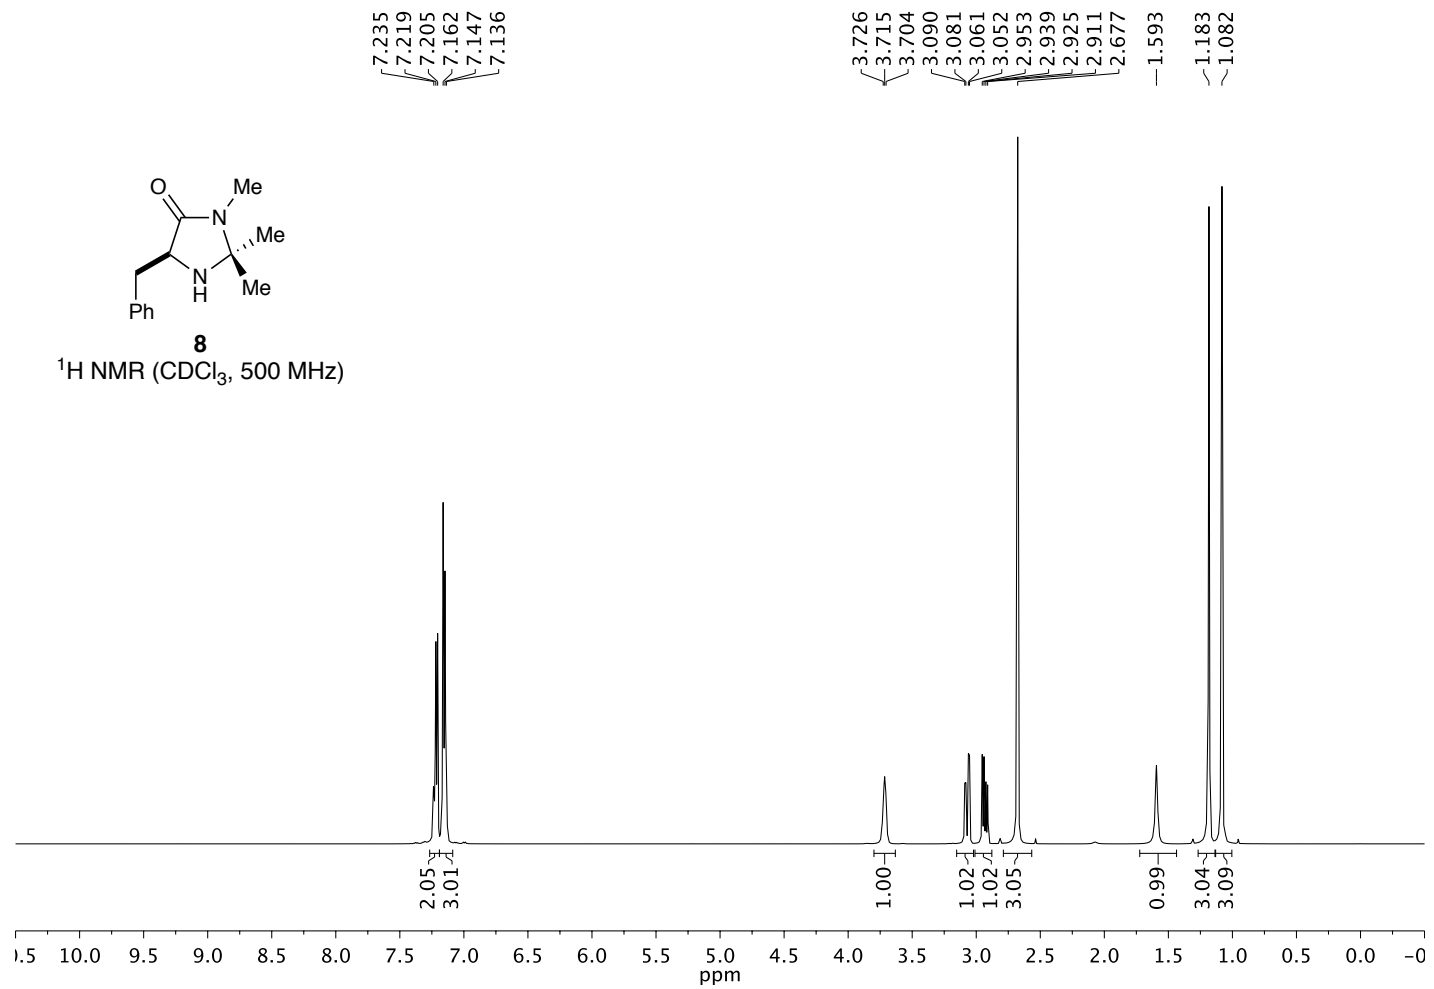



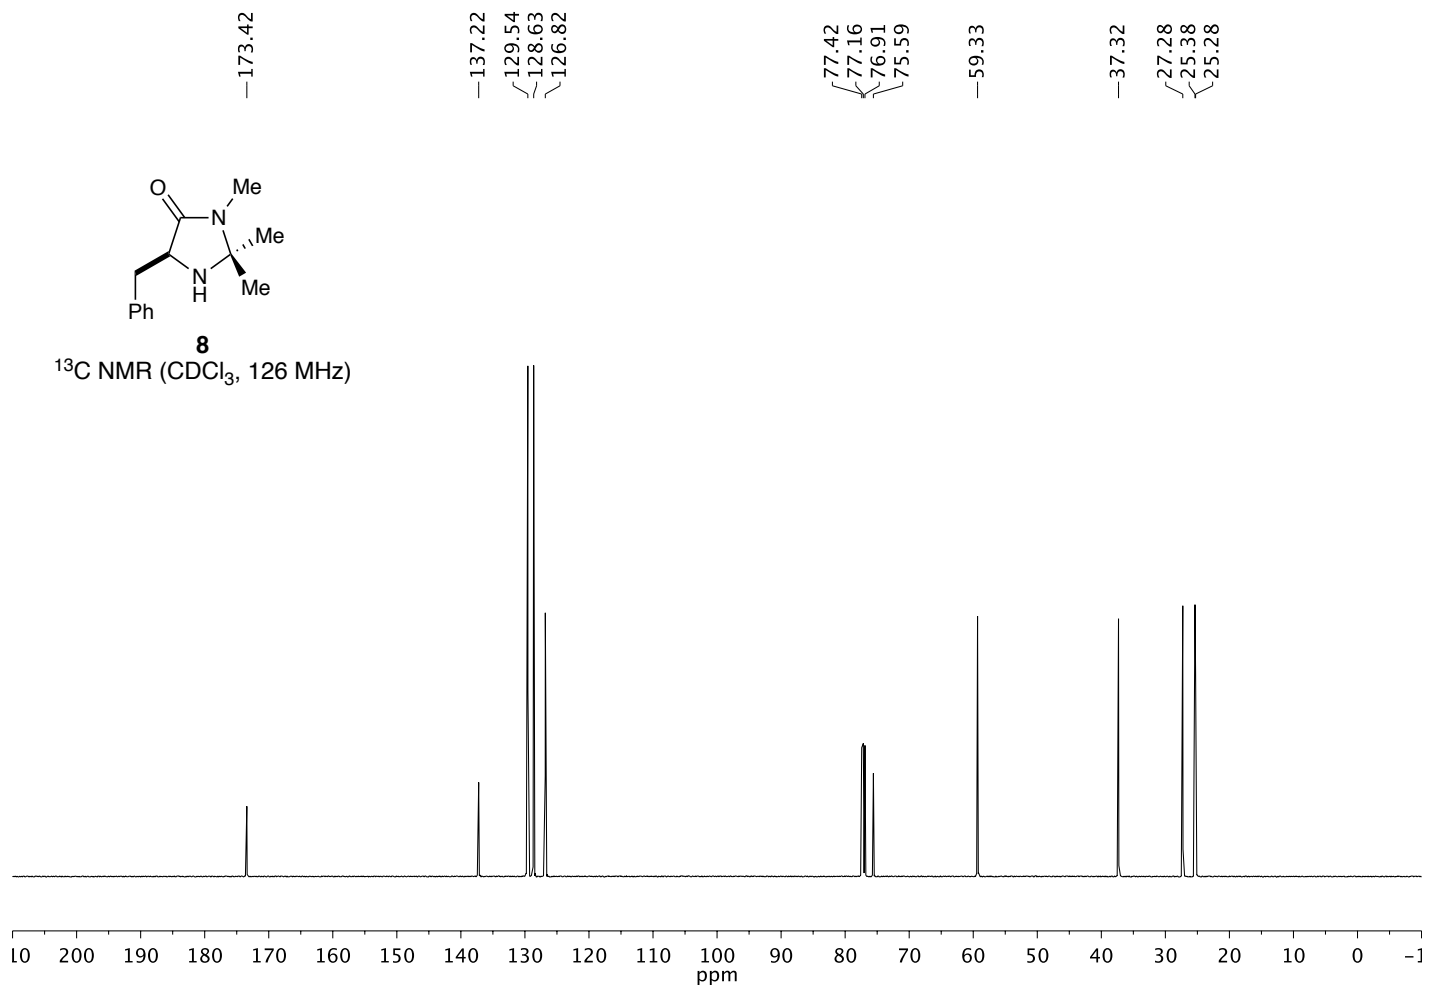

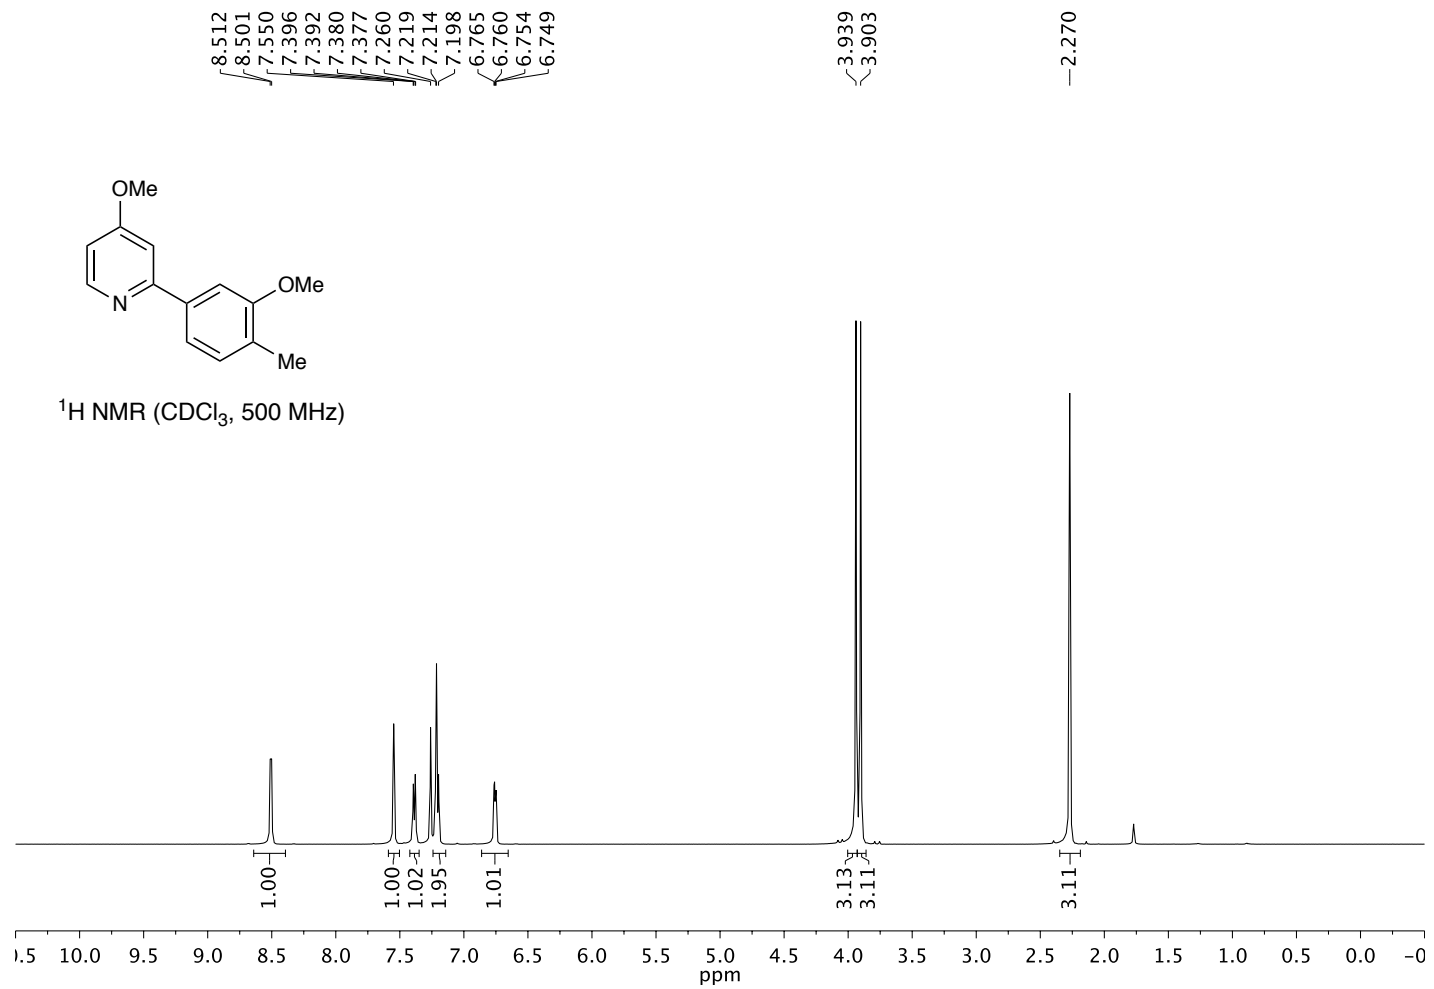

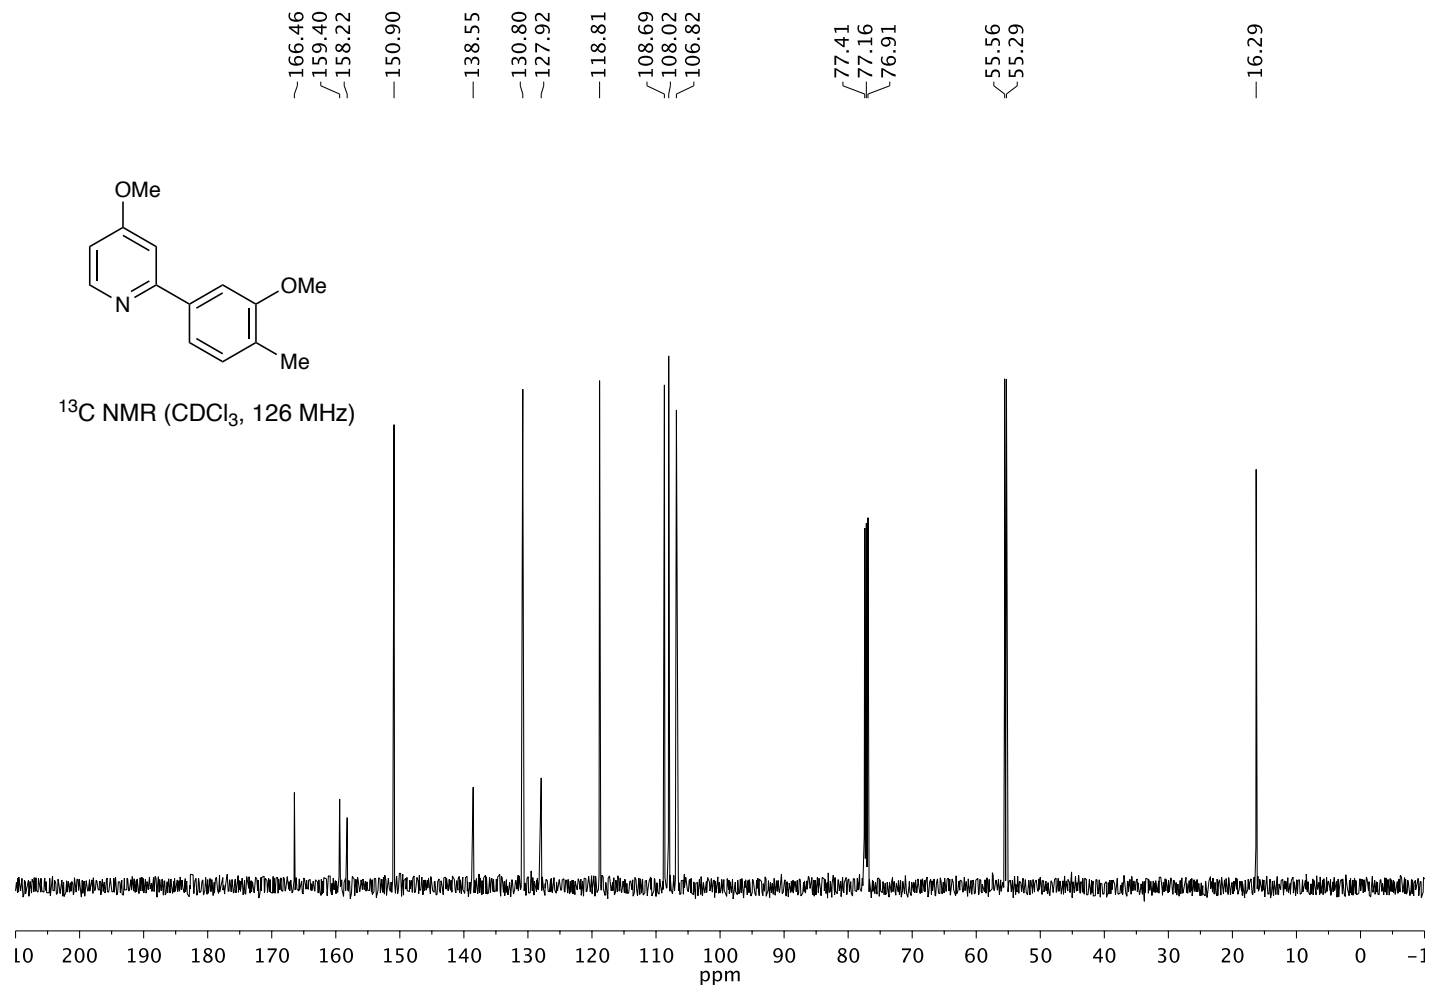

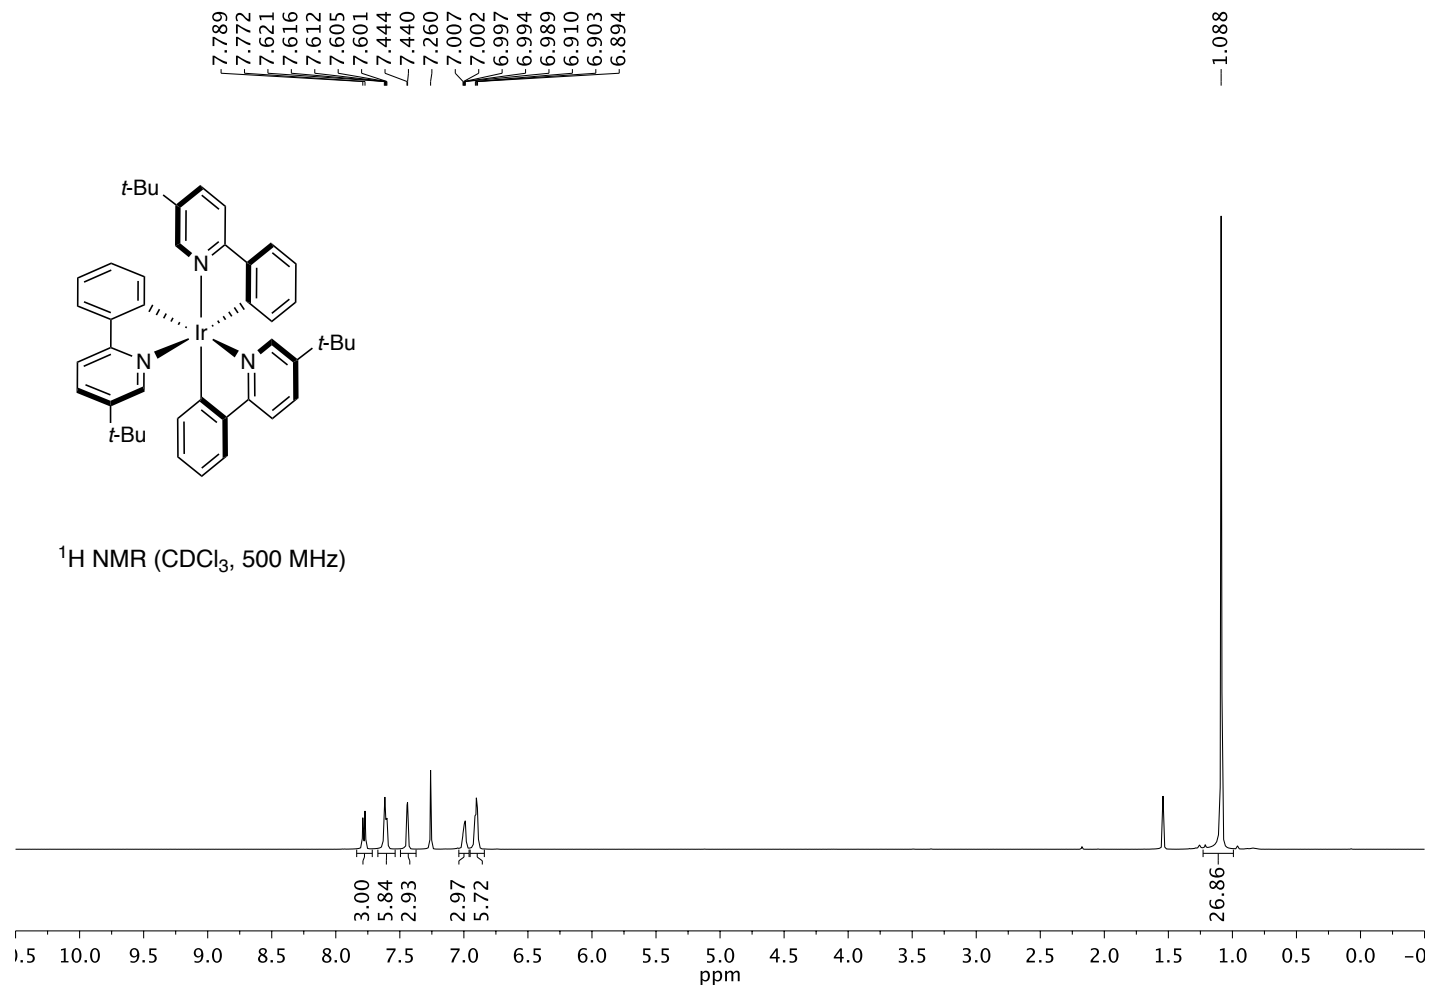

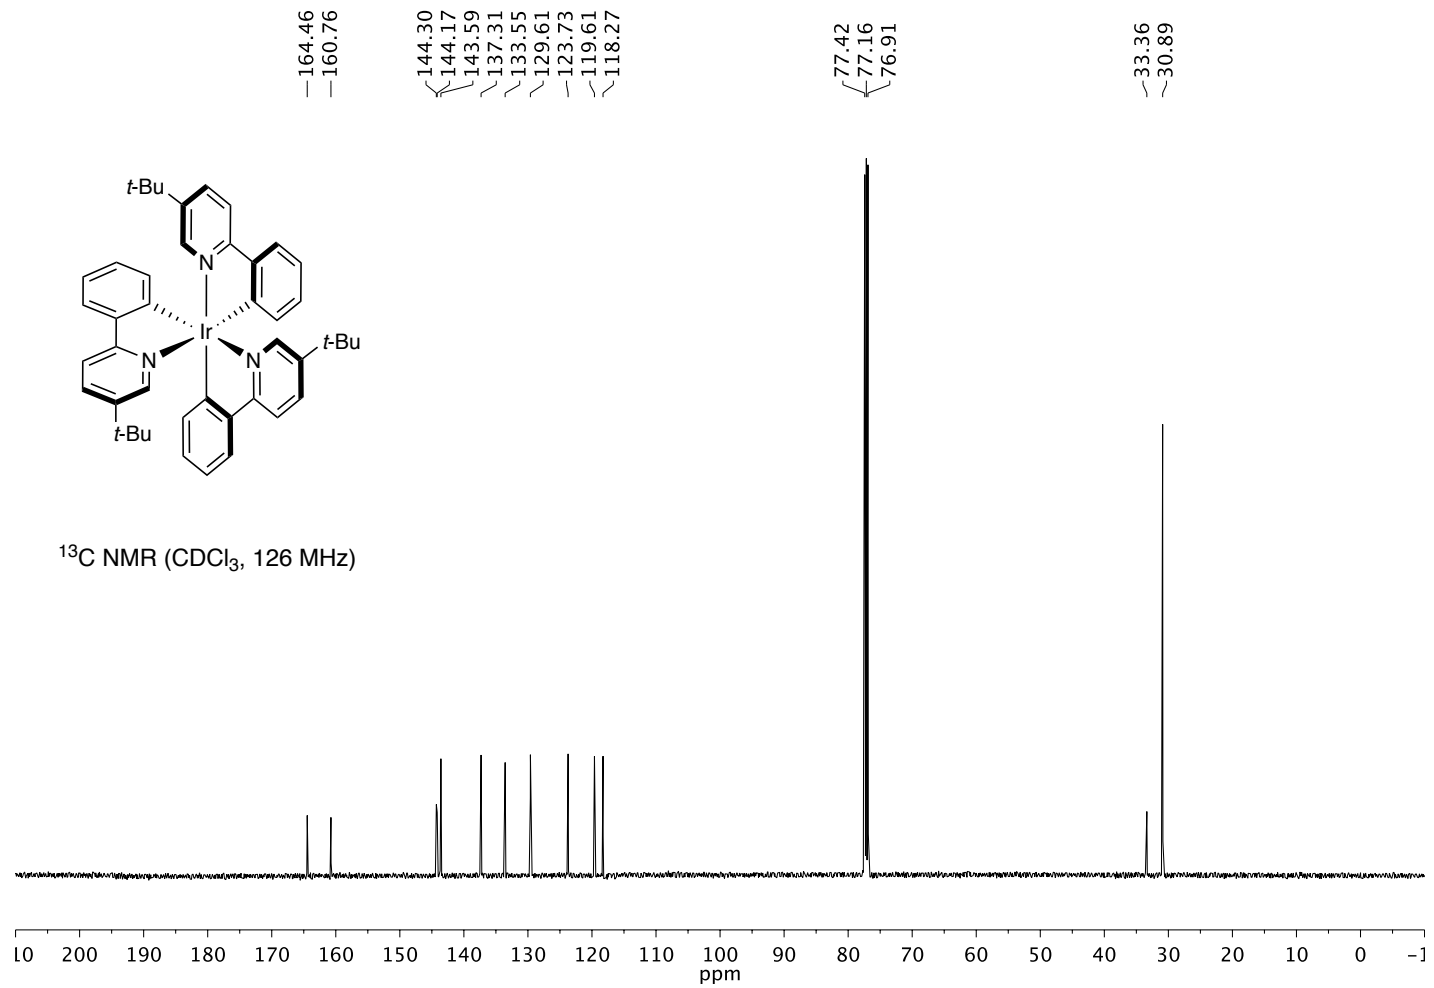

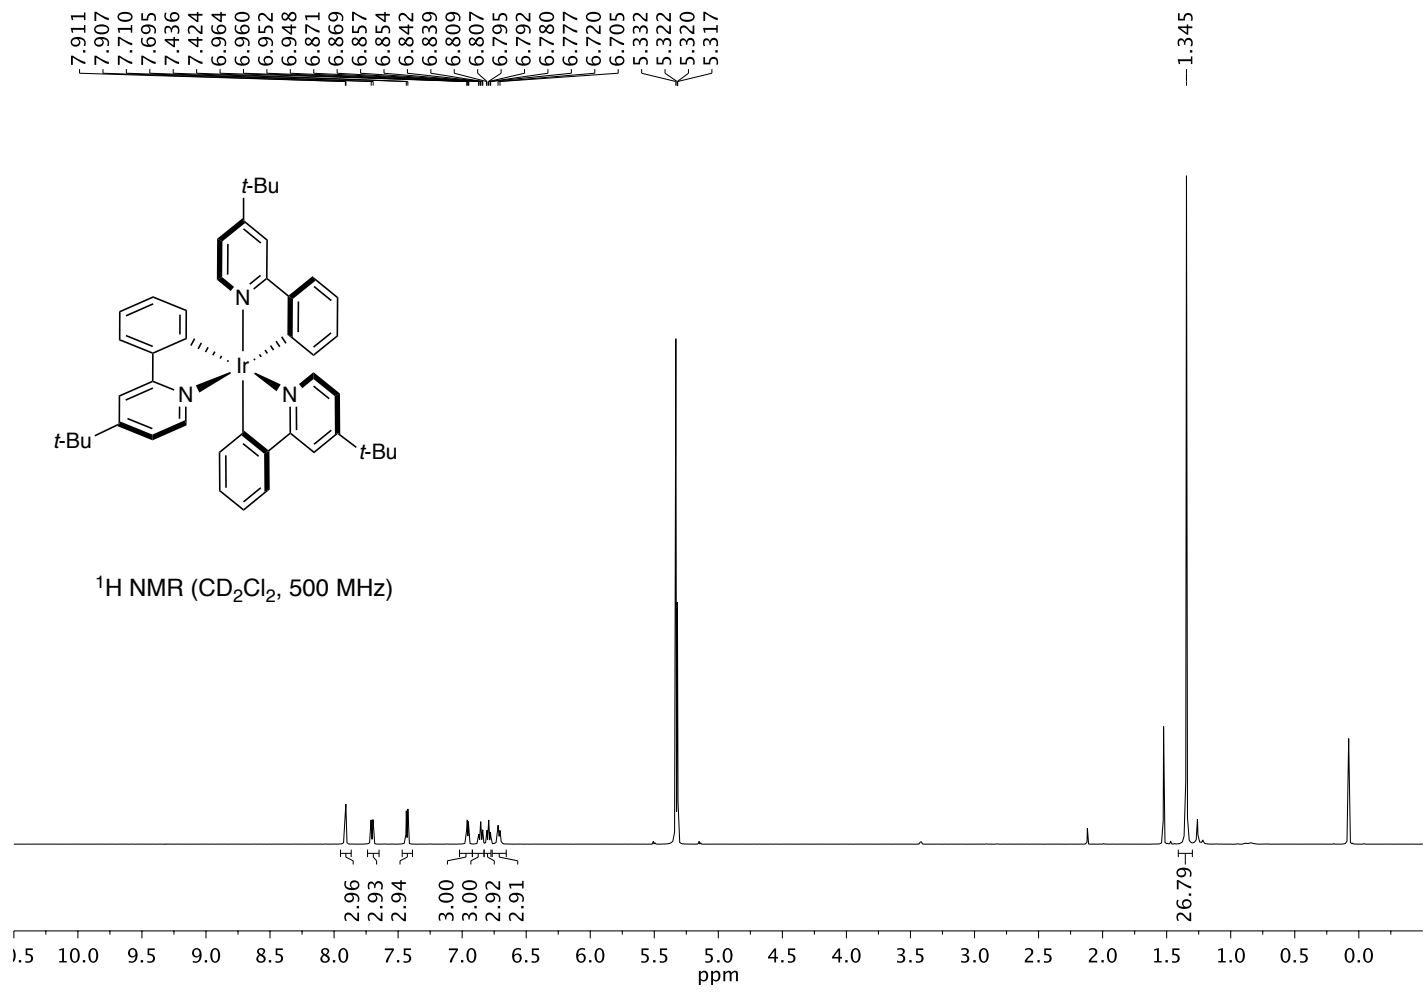

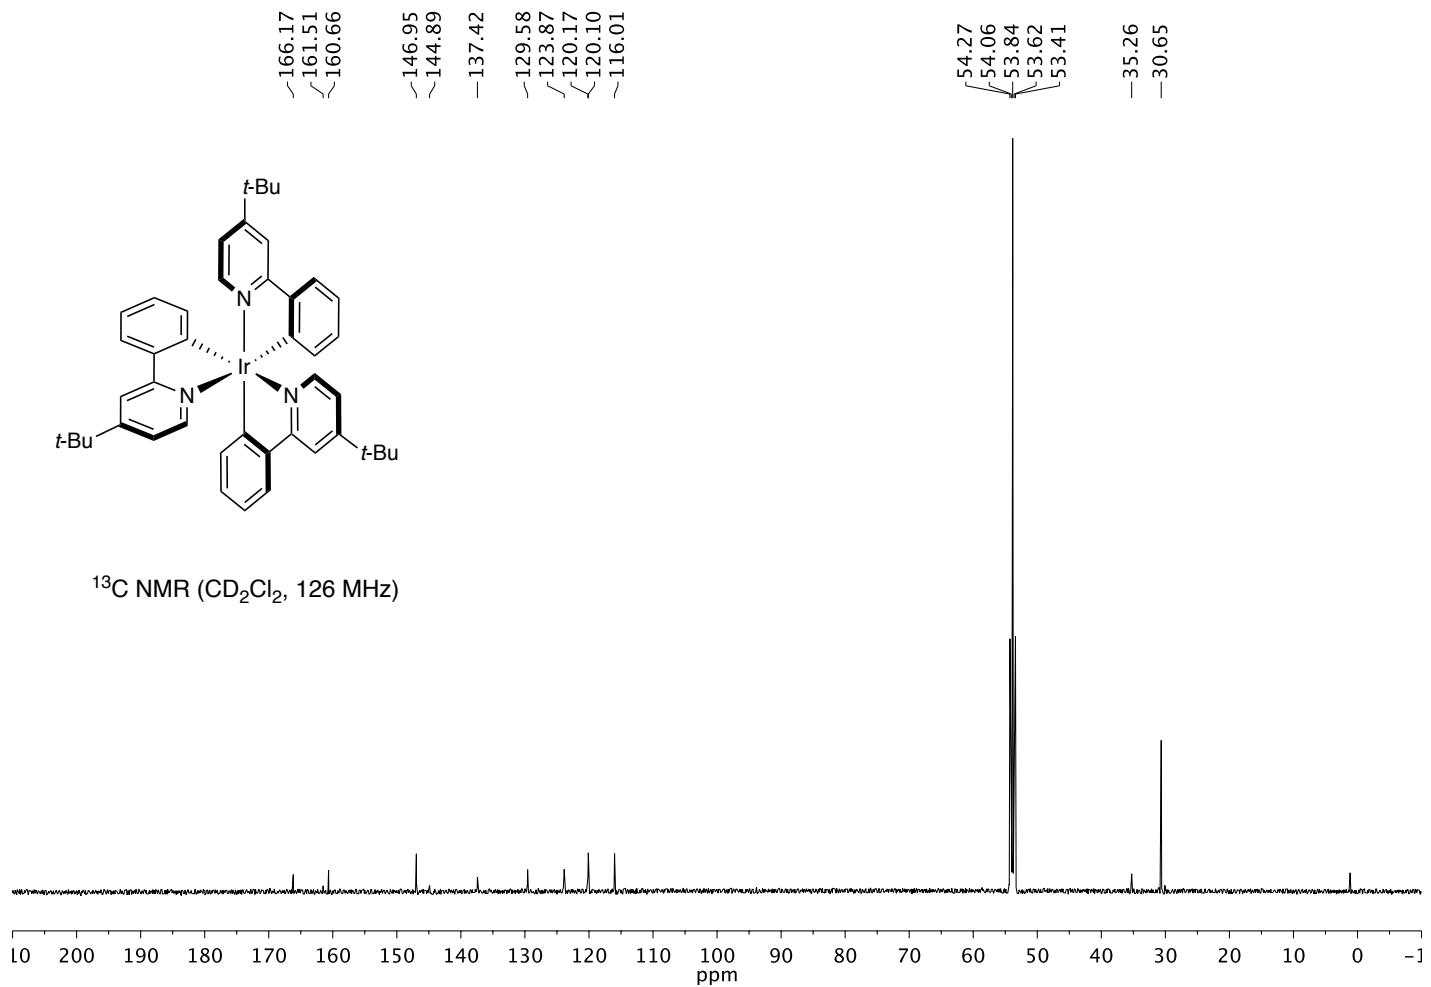

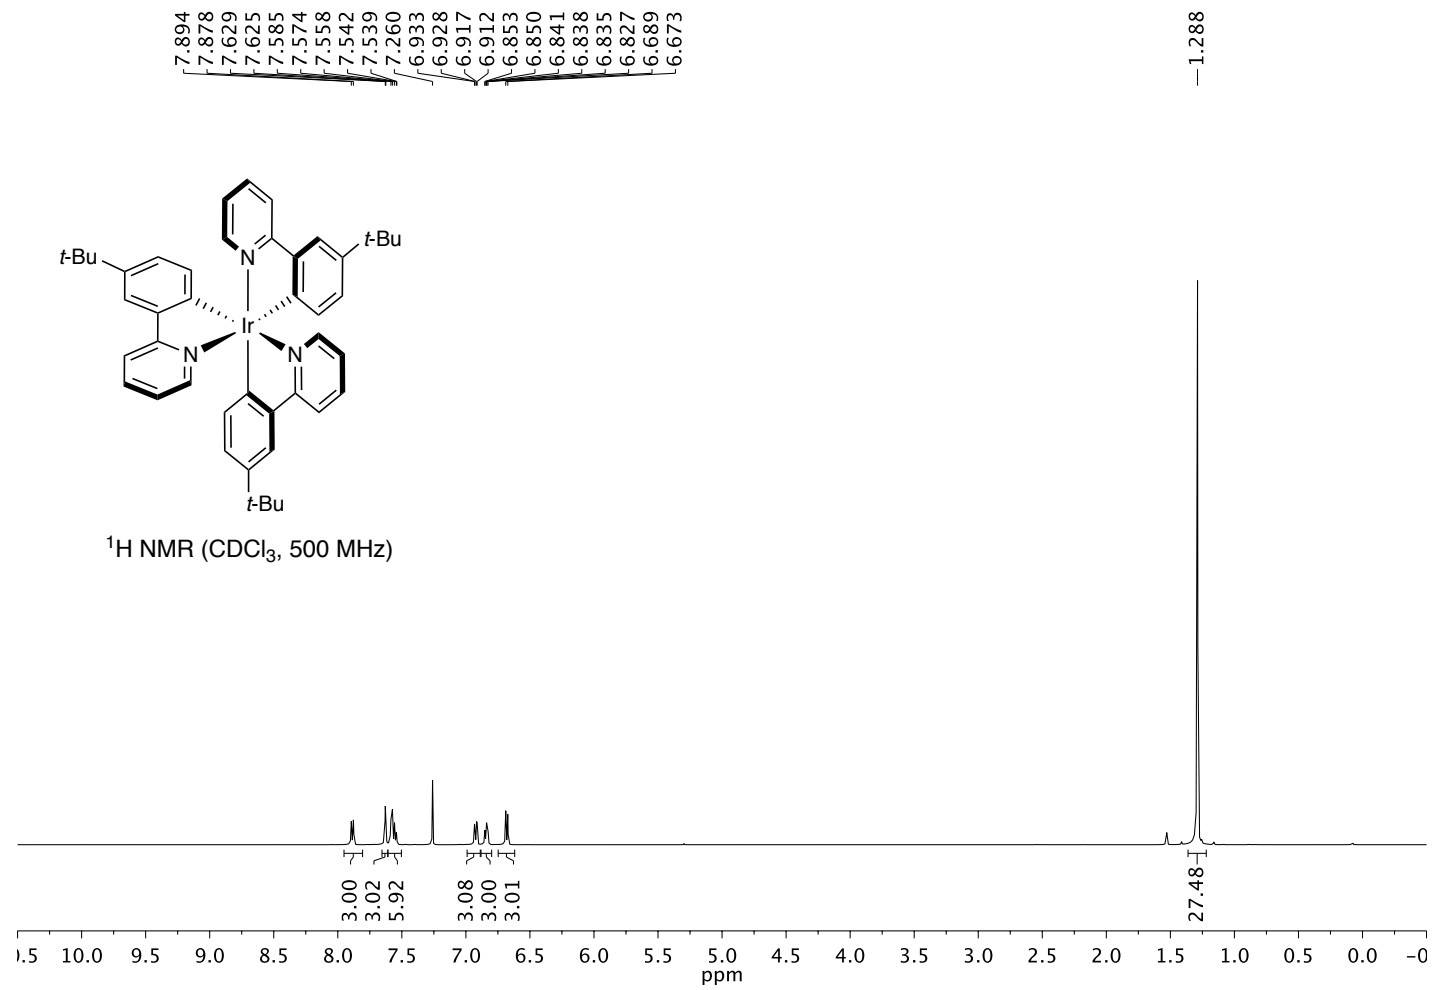



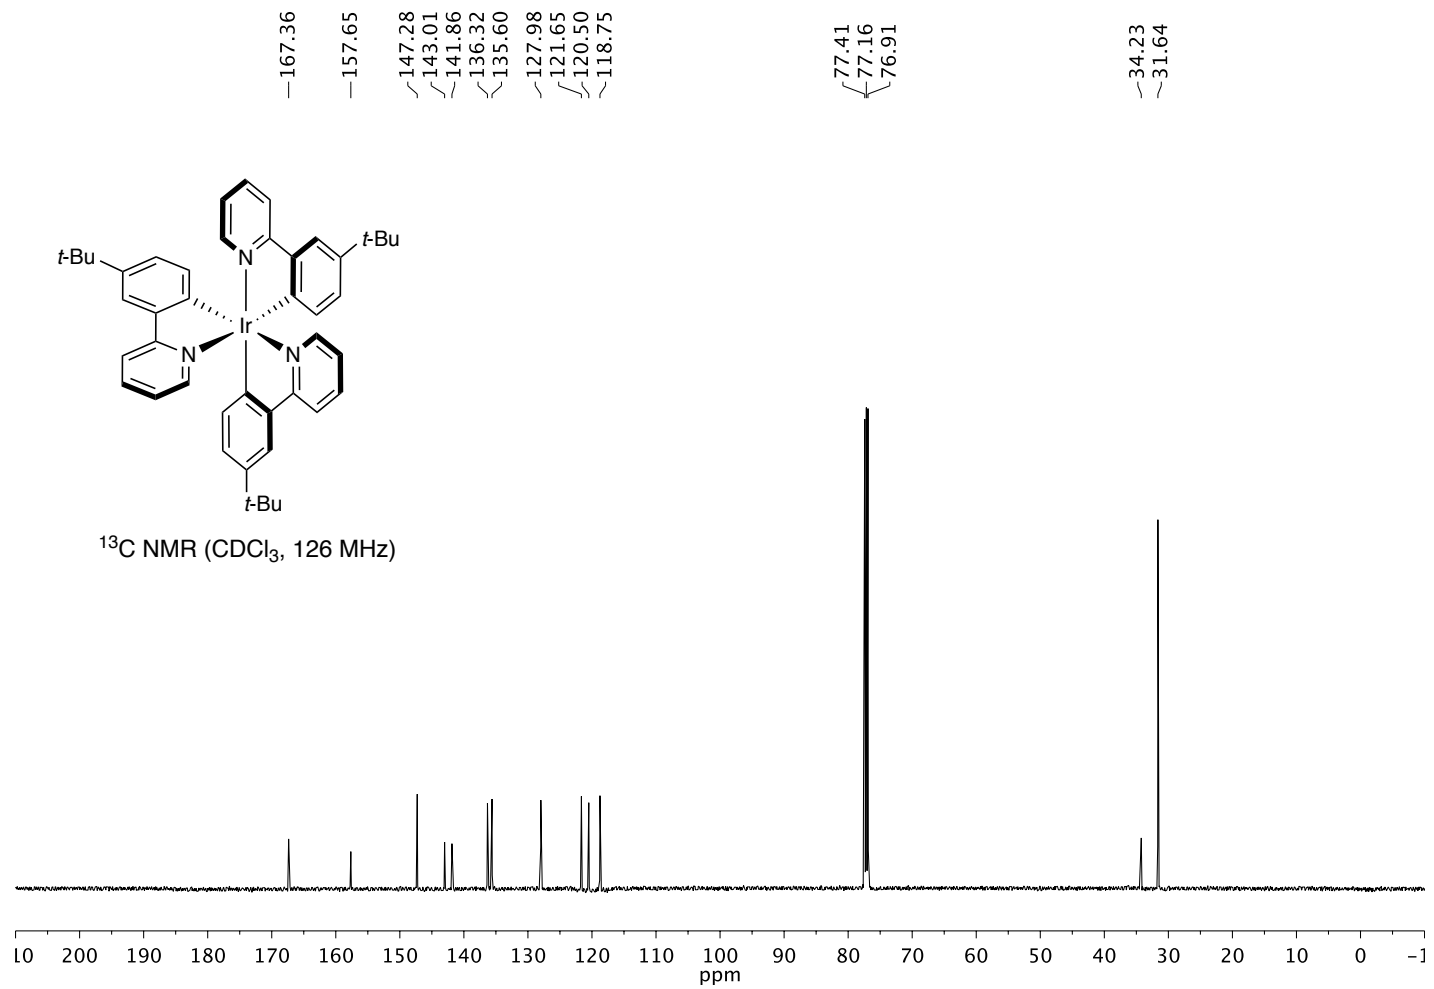

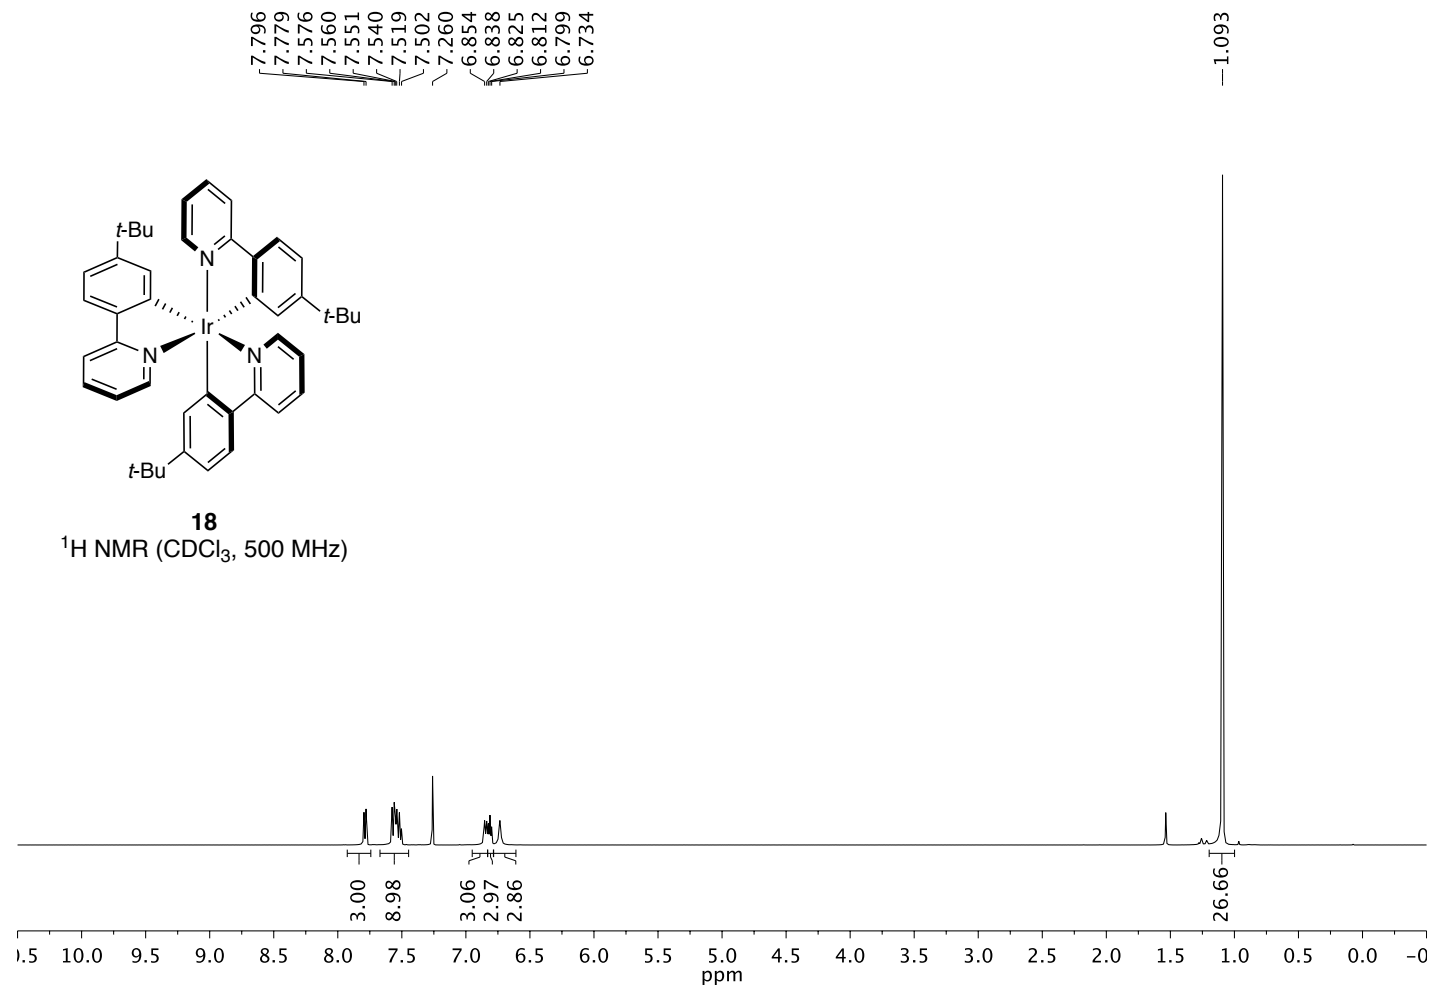

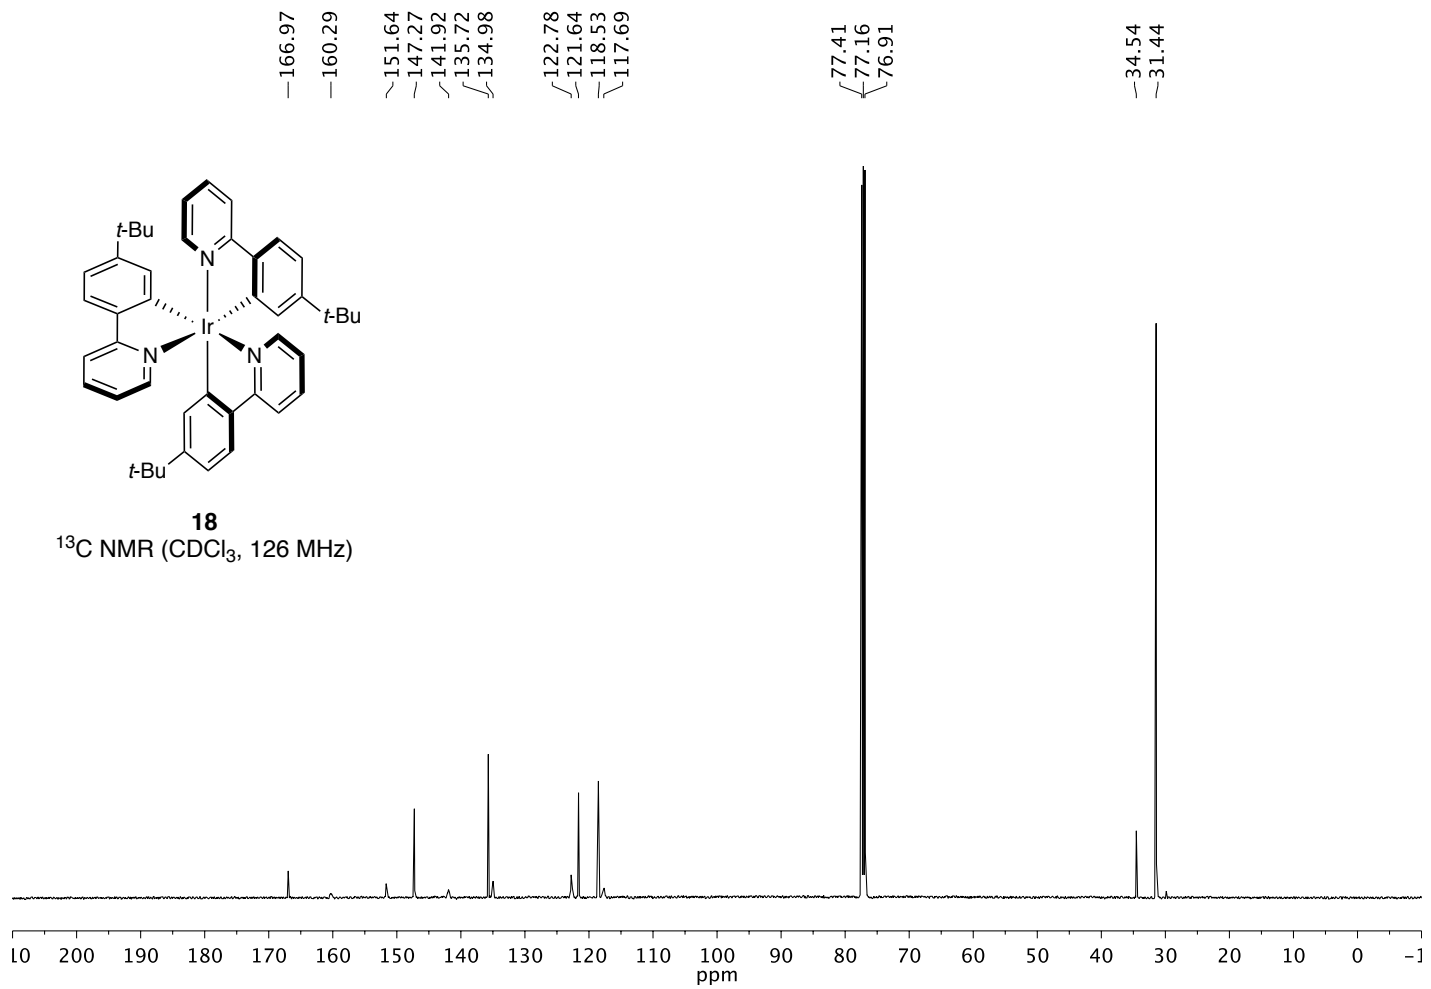

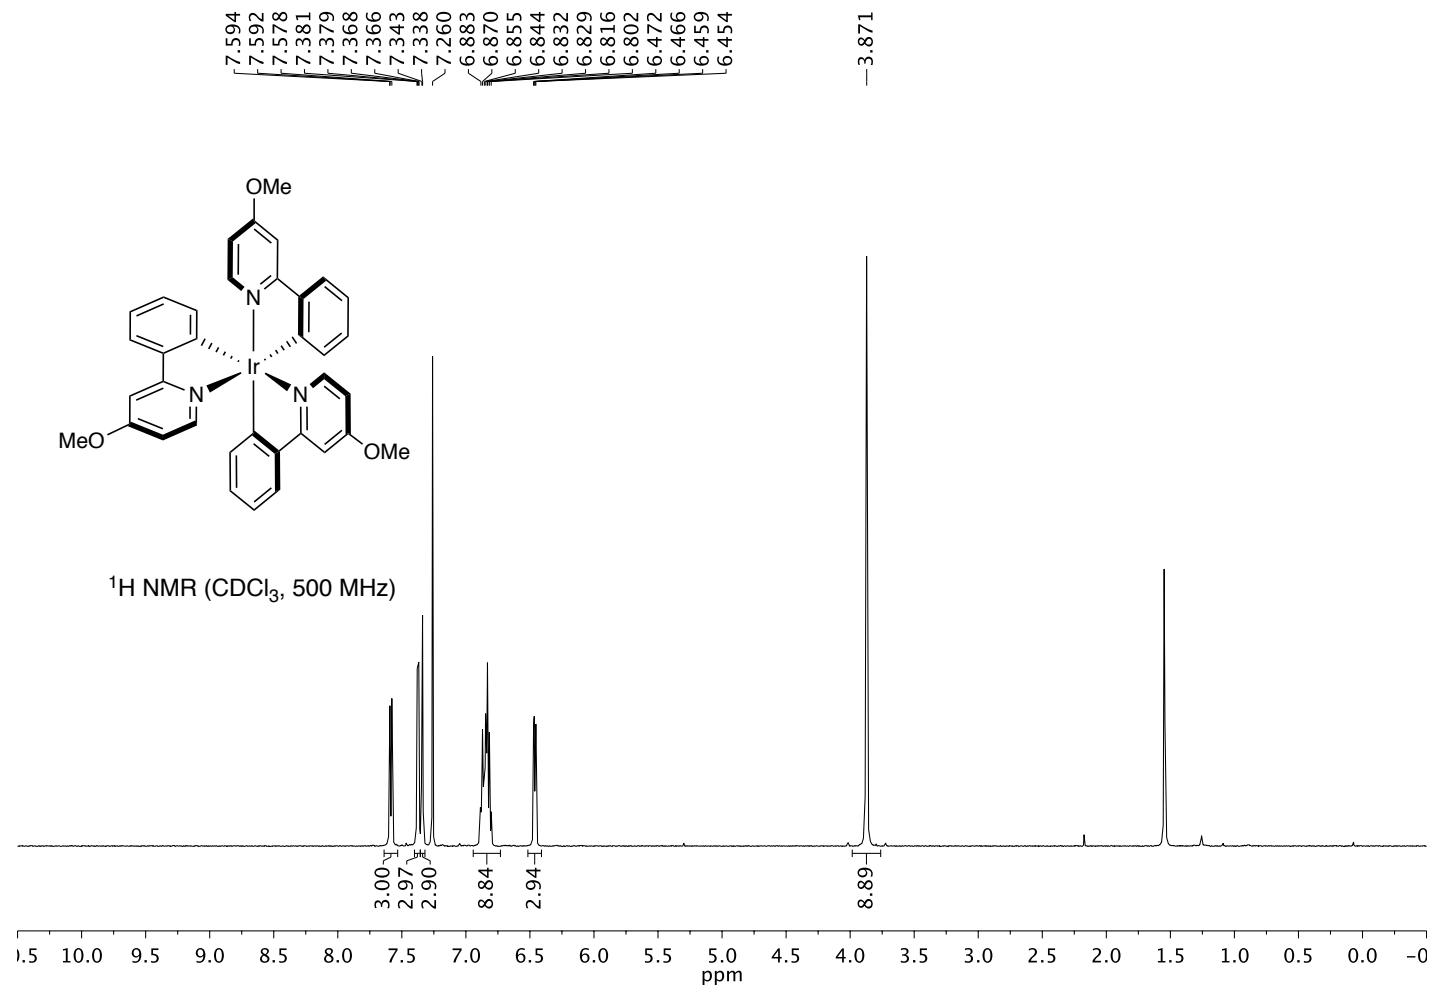



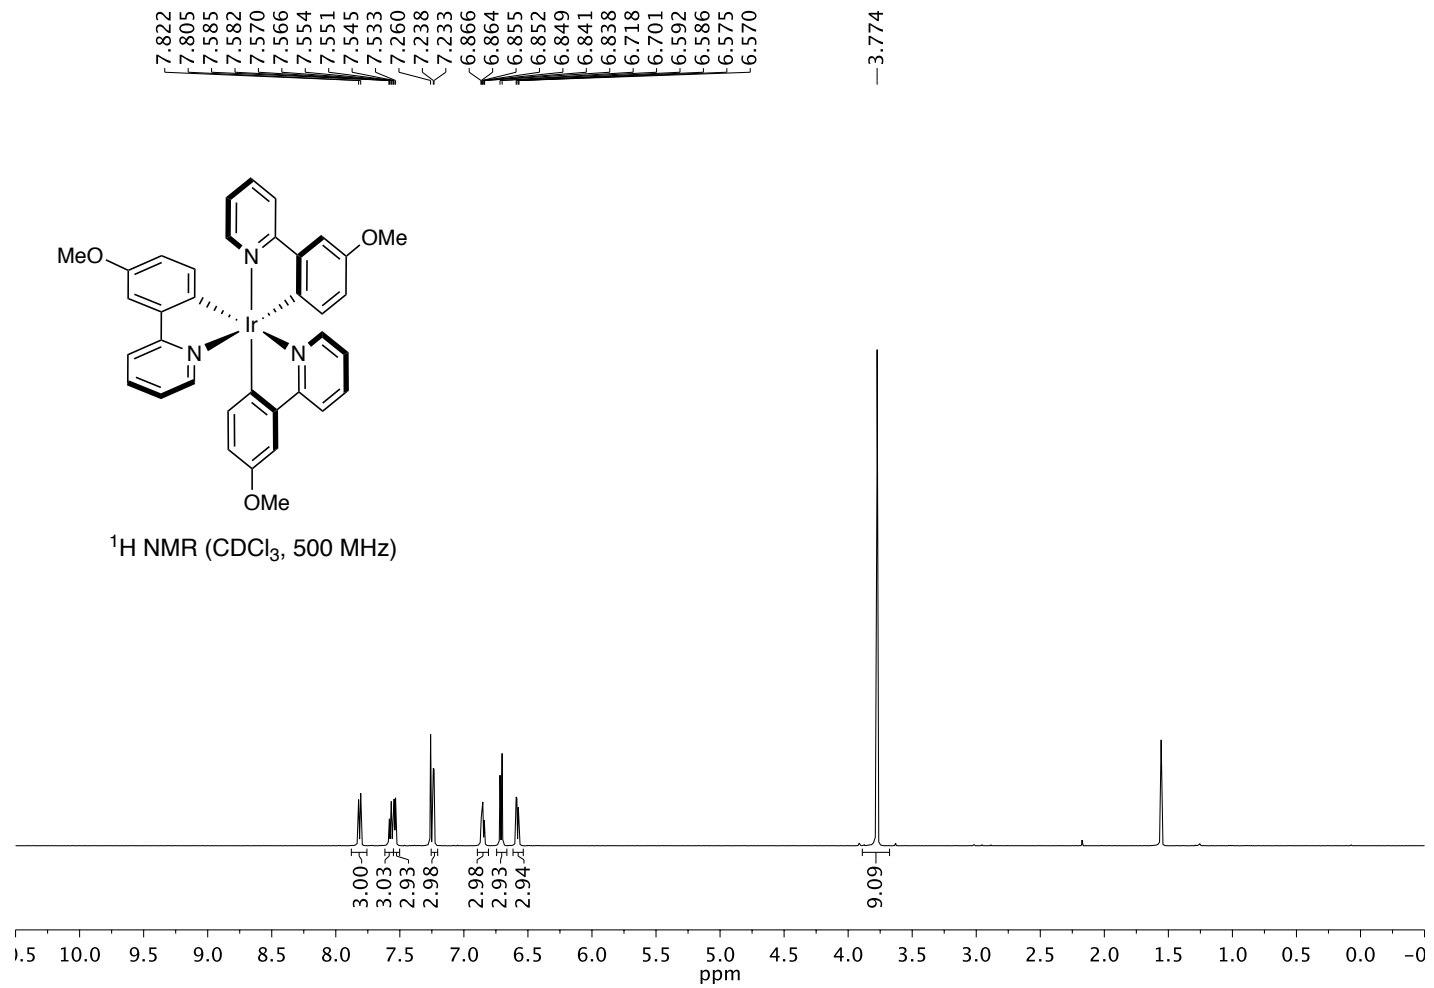

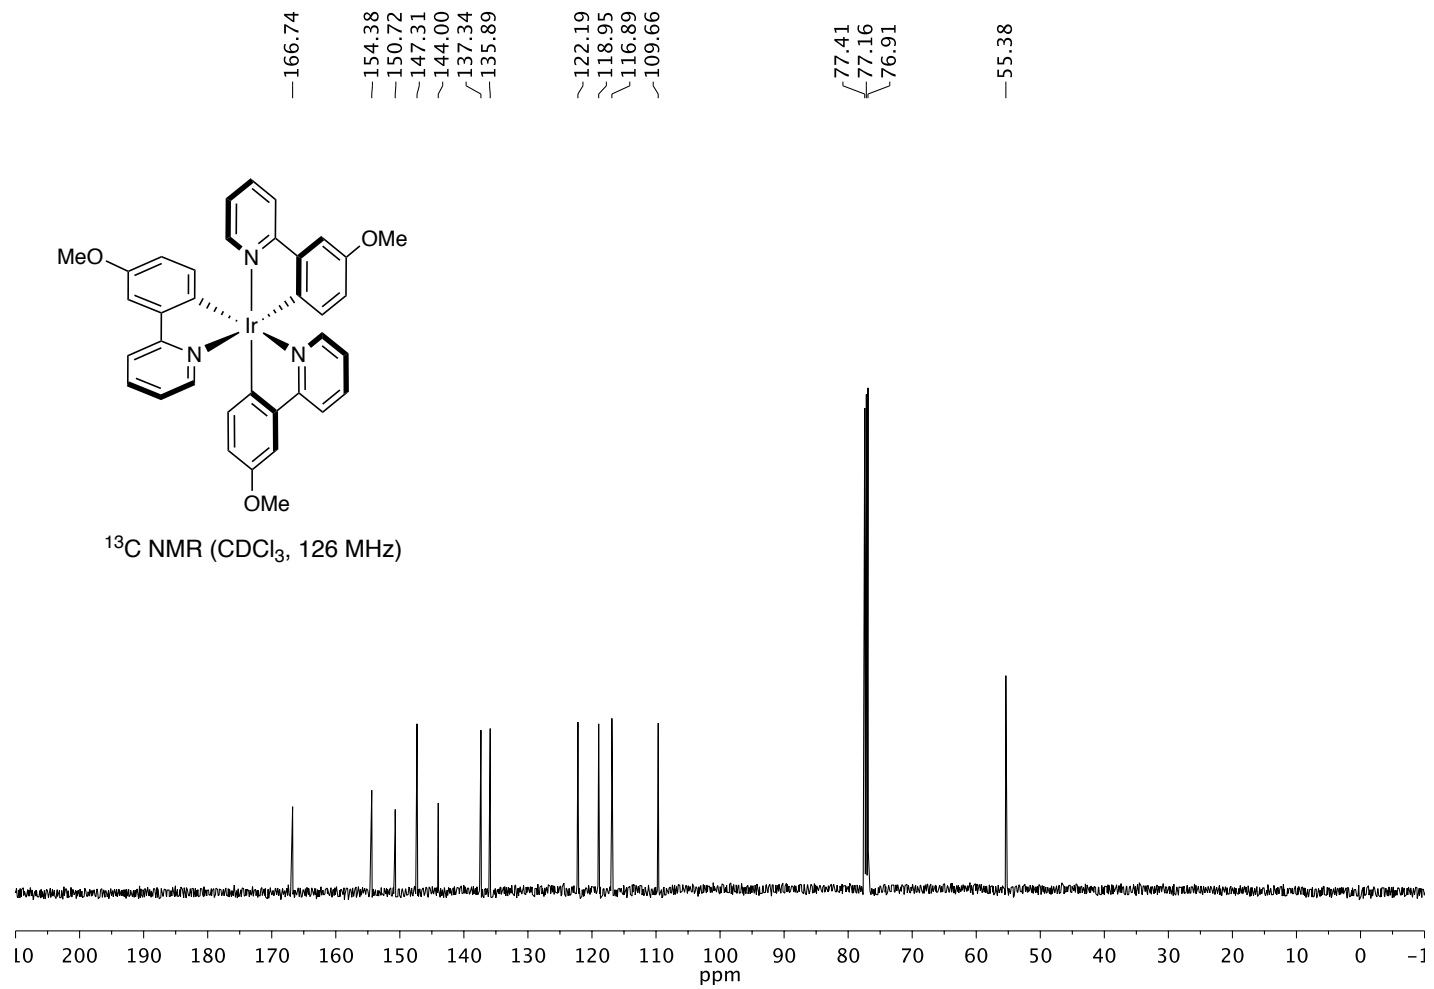

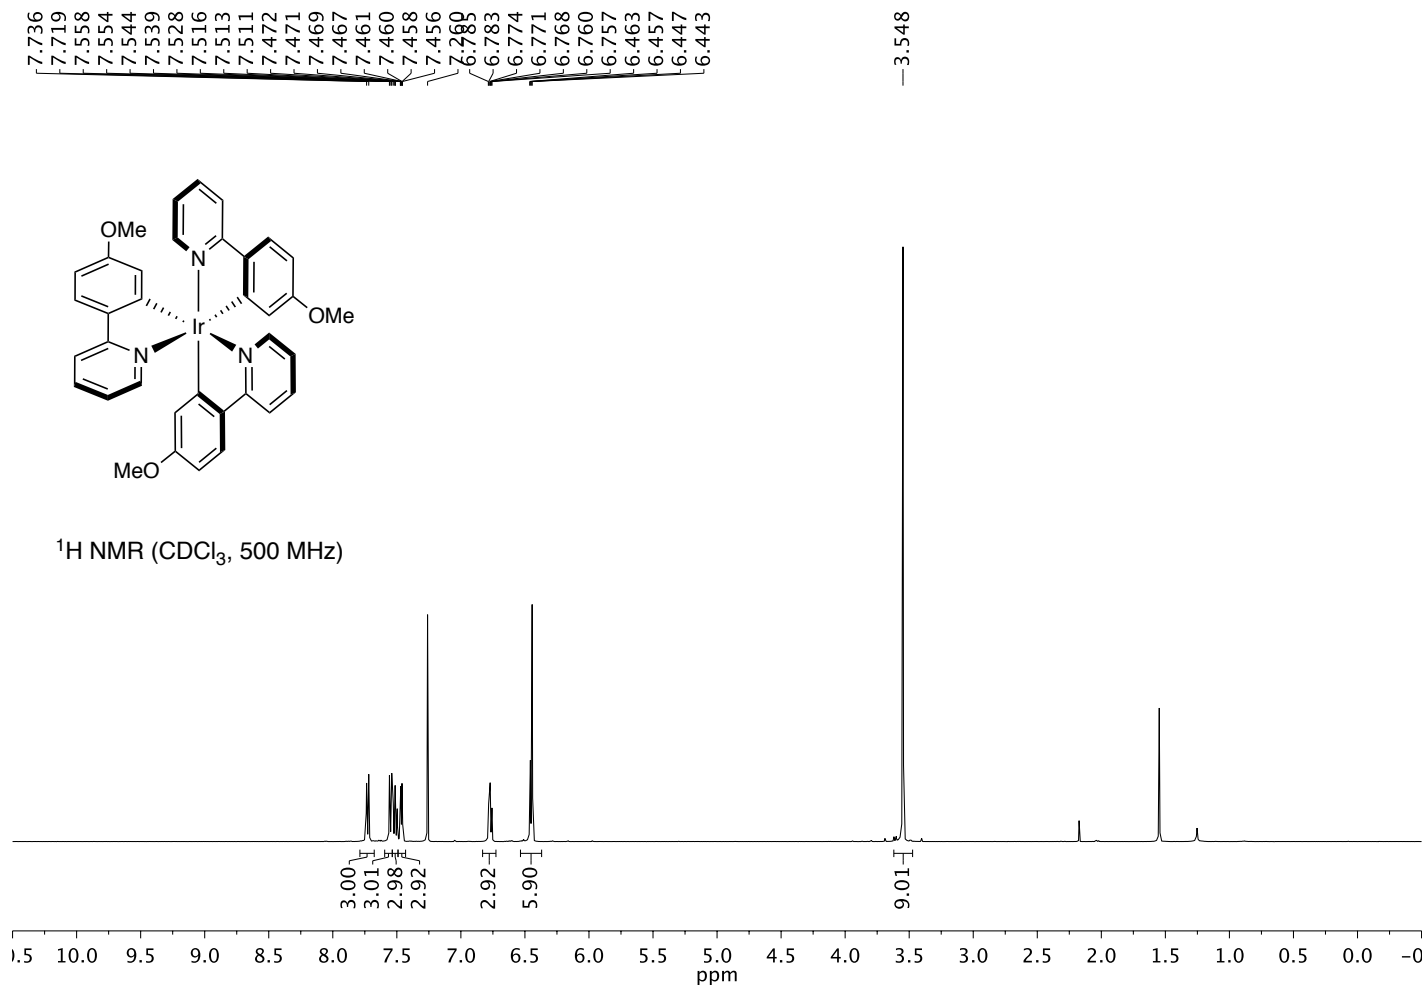



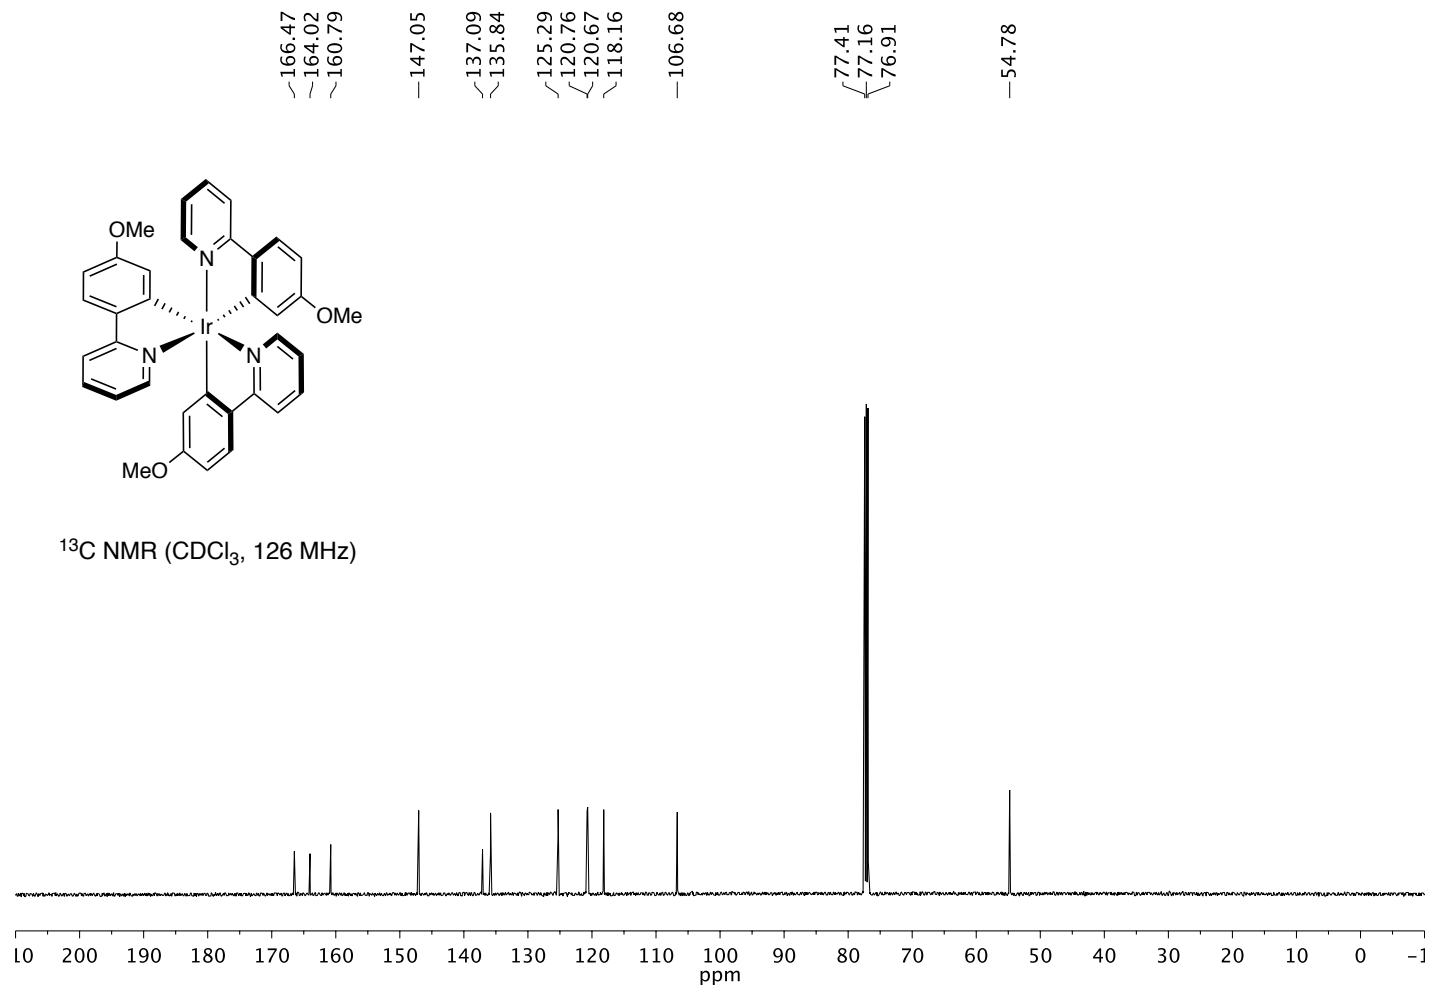

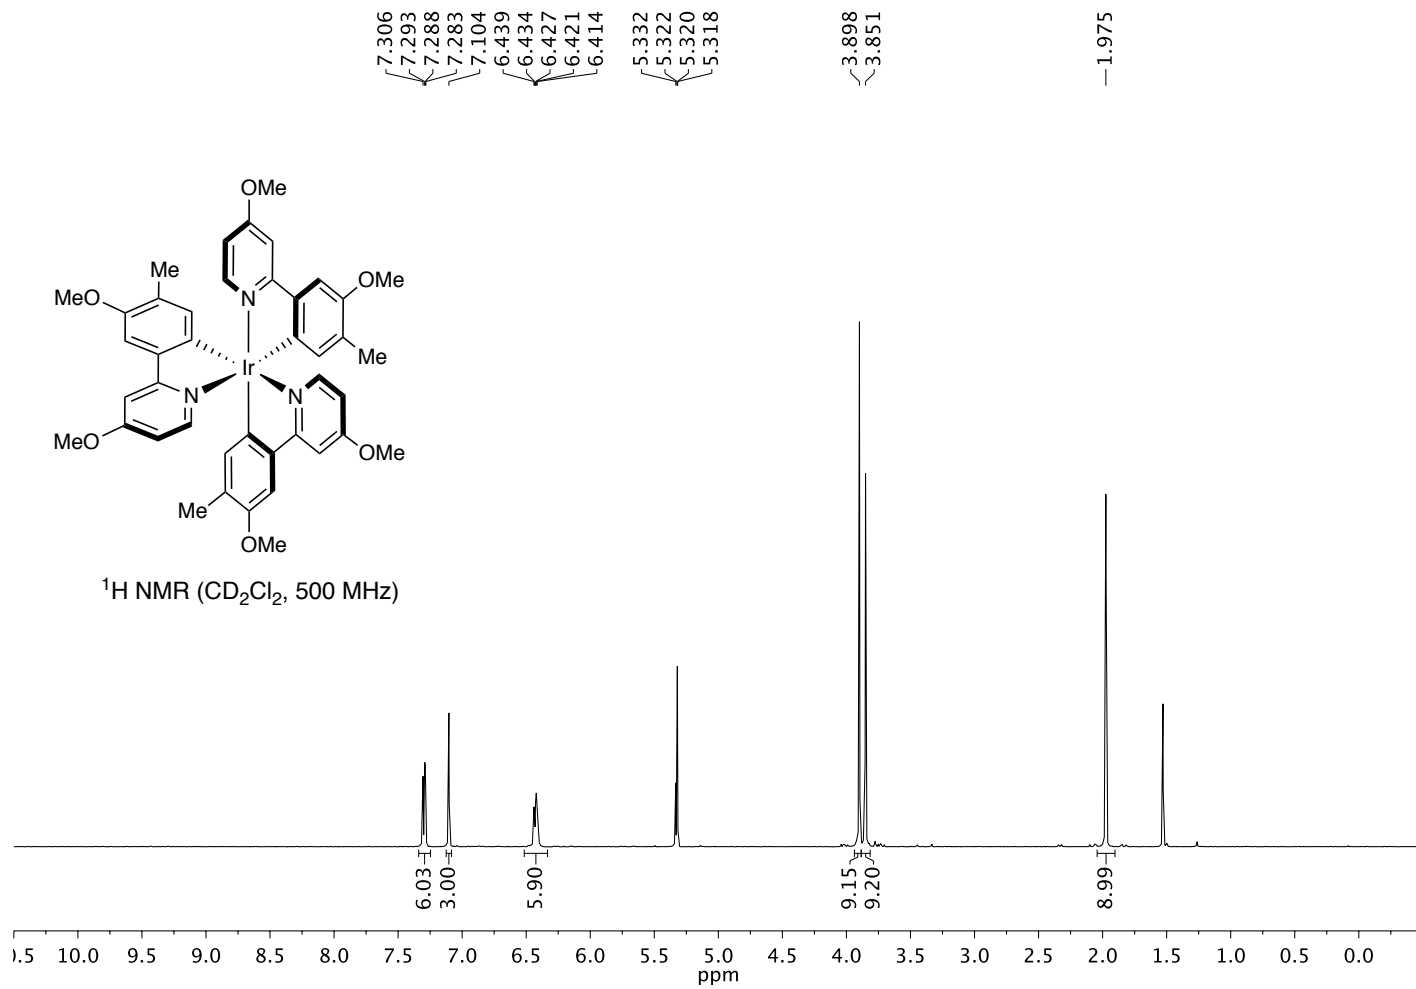

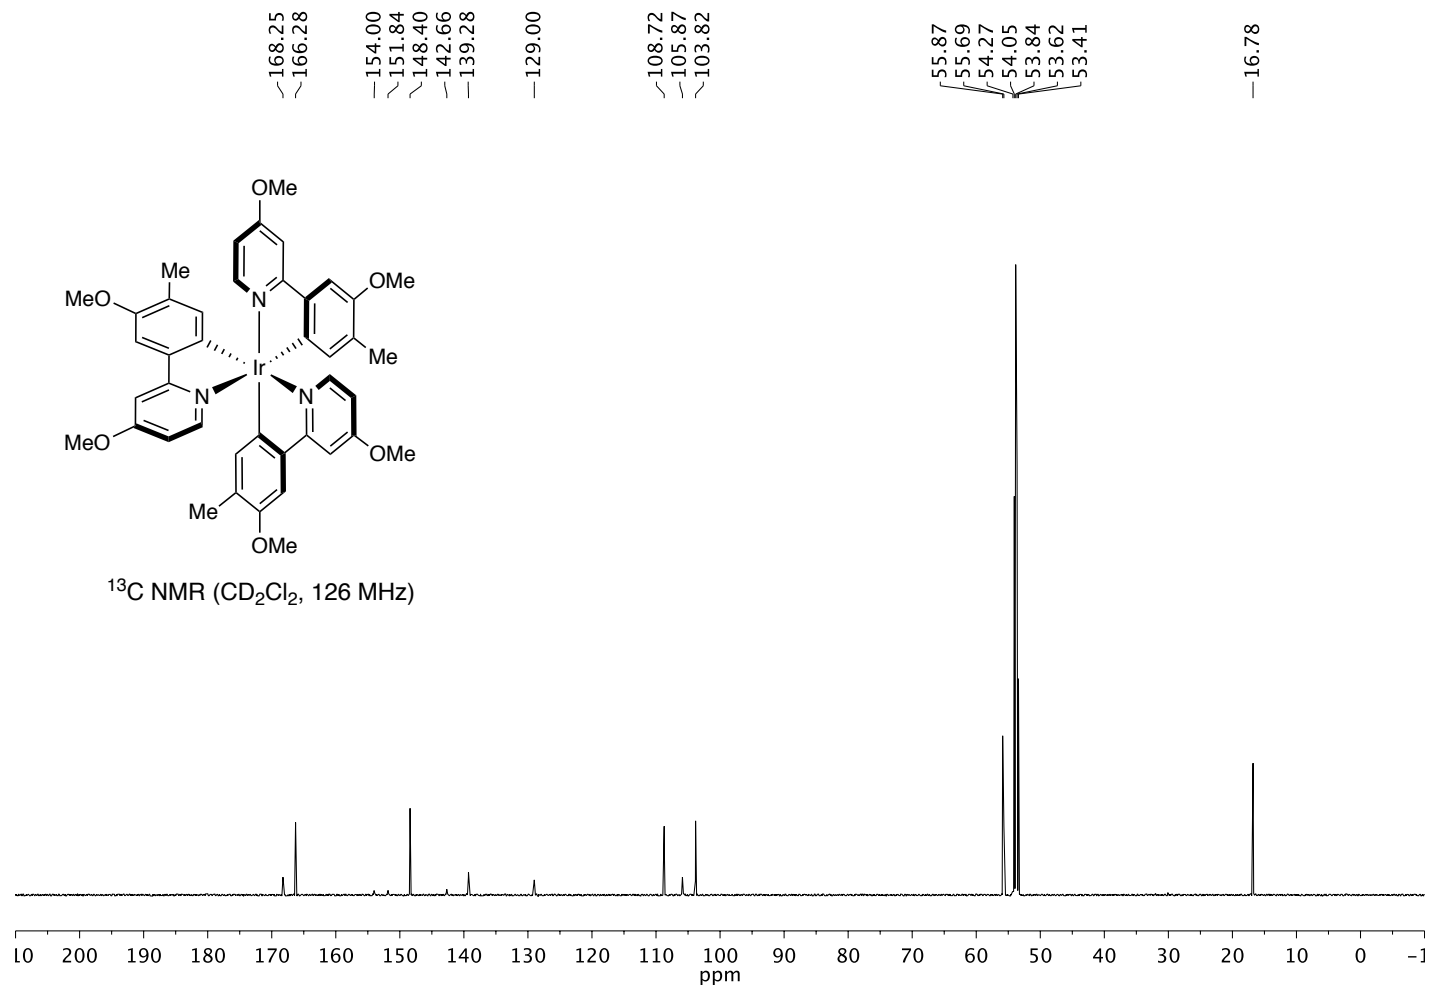

Supplement: NIHMS954729-supplement-SUP_INFO.pdf [file NIHMS954729-supplement-SUP_INFO.pdf]
